# Supplementary material for: A Transcriptomic Meta-Analysis Shows Lipid Metabolism Dysregulation as an Early Pathological Mechanism in the Spinal Cord of SOD1 Mice
Source: Int J Mol Sci. 2021 Sep 2;22(17):9553. doi: 10.3390/ijms22179553 (PMC8431303; doi:10.3390/ijms22179553)
Supplement: Supplementary file 1 [file ijms-22-09553-s001.zip]

Archive with 6 entries (6 files):
- Supplementary Files/Figura Supl.pdf
- Supplementary Files/Table S1 DESeq2 results of Study 1.xlsx
- Supplementary Files/Table S2 List of lipid genes.xlsx
- Supplementary Files/Table S3 List of genes found in the Early-MA and Late-Ma .xlsx
- Supplementary Files/Table S4 List of lipid genes found in the Early-MA and Late-MA.xlsx
- Supplementary Files/Table S5 List of primers used for qPCR validations.xlsx
