# Supplementary material for: A Transcriptomic Meta-Analysis Shows Lipid Metabolism Dysregulation as an Early Pathological Mechanism in the Spinal Cord of SOD1 Mice
Source: Int J Mol Sci. 2021 Sep 2;22(17):9553. doi: 10.3390/ijms22179553 (PMC8431303; doi:10.3390/ijms22179553)
Supplement: Supplementary file 1 [file ijms-22-09553-s001.zip › Supplementary Files/Table S1 DESeq2 results of Study 1.xlsx]

## Sheet: Study1_deseq2
Table S1. DESeq2 results of Study 1
GeneID	Base mean	log2FC	StdErr	Wald-Stats	P-value	P-adj
Serpina3n	2582.99	1.44345	0.0549314	26.2773	3.48e-152	5.75e-148
Itgax	78.2734	1.58357	0.0923031	17.1562	5.64e-66	4.66e-62
C4b	4742.83	1.12883	0.0689009	16.3834	2.51e-60	1.38e-56
Mpeg1	1272.26	1.00668	0.0639322	15.746	7.32e-56	3.02e-52
Lpl	367.532	1.27789	0.0831916	15.3608	3e-53	9.91e-50
Chodl	483.172	-1.27548	0.0841214	-15.1623	6.28e-52	1.73e-48
Gpnmb	182.754	1.3378	0.0890405	15.0246	5.07e-51	1.2e-47
Clec7a	105.06	1.37481	0.0922668	14.9003	3.28e-50	6.77e-47
Cd68	270.511	1.14652	0.0775899	14.7766	2.07e-49	3.8e-46
Grn	1578.26	0.679239	0.0485206	13.999	1.58e-44	2.61e-41
Tyrobp	441.392	0.99546	0.0715228	13.9181	4.92e-44	7.39e-41
C1qc	1225.44	0.758279	0.0576392	13.1556	1.58e-39	2.18e-36
C1qb	1442.5	0.727072	0.0571008	12.7331	3.87e-37	4.92e-34
Atf3	85.2104	1.15901	0.0923499	12.5502	3.96e-36	4.68e-33
Ctsb	18714	0.275035	0.0235552	11.6762	1.69e-31	1.86e-28
Nckap1l	375.838	0.741185	0.0635908	11.6555	2.15e-31	2.22e-28
Ccl3	34.8519	1.01654	0.0881163	11.5363	8.65e-31	7.94e-28
Slc14a1	1035.63	0.592945	0.0513974	11.5365	8.64e-31	7.94e-28
Laptm5	1033.44	0.670594	0.0582089	11.5205	1.04e-30	9.05e-28
Cst7	32.4717	0.977852	0.0850981	11.4909	1.47e-30	1.21e-27
C1qa	1516.38	0.694159	0.0612729	11.329	9.43e-30	7.42e-27
Ctsd	14100.3	0.500615	0.0444354	11.2661	1.93e-29	1.45e-26
Fcrls	533.026	0.869685	0.0785716	11.0687	1.78e-28	1.28e-25
Itgb2	273.42	0.855079	0.0778134	10.9888	4.32e-28	2.98e-25
Ctss	2520.75	0.642698	0.0586859	10.9515	6.54e-28	4.32e-25
Ly86	339.611	0.842019	0.0776774	10.8399	2.23e-27	1.41e-24
Hexb	3074.79	0.586196	0.0541849	10.8184	2.82e-27	1.72e-24
Lgals3	226.296	0.997318	0.0922518	10.8108	3.06e-27	1.81e-24
Csf1r	3041.39	0.533111	0.0493906	10.7938	3.68e-27	2.1e-24
Sprr1a	45.7677	0.90726	0.0844405	10.7444	6.3e-27	3.47e-24
Timp1	51.0925	0.979297	0.0922074	10.6206	2.39e-26	1.27e-23
Mmp12	24.0034	0.844555	0.0797188	10.5942	3.17e-26	1.64e-23
Plek	496.983	0.635827	0.0607081	10.4735	1.14e-25	5.72e-23
C3ar1	92.6712	0.921573	0.088686	10.3914	2.71e-25	1.32e-22
Olfml3	671.942	0.709227	0.0686563	10.3301	5.15e-25	2.43e-22
A230070E04Rik	13275.5	-0.598977	0.0581454	-10.3014	6.95e-25	3.19e-22
Ctsz	1351.78	0.62661	0.0614903	10.1904	2.19e-24	9.77e-22
Osmr	226.749	0.806039	0.0793631	10.1564	3.1e-24	1.35e-21
Ctsl	2671.5	0.416241	0.041751	9.96959	2.07e-23	8.77e-21
Trem2	328.329	0.744837	0.0764893	9.7378	2.08e-22	8.59e-20
Lag3	205.102	0.788025	0.0819262	9.61872	6.67e-22	2.69e-19
Itgam	756.776	0.544137	0.0570511	9.53771	1.46e-21	5.74e-19
Ptprc	183.799	0.808475	0.0861402	9.38557	6.26e-21	2.4e-18
Cd84	124.57	0.801352	0.0861023	9.30698	1.32e-20	4.94e-18
Mmp9	270.23	-0.741697	0.0800869	-9.26116	2.02e-20	7.42e-18
Myo1f	157.904	0.79242	0.0864102	9.17044	4.71e-20	1.69e-17
Dhrs1	2267.29	0.500472	0.0546545	9.15701	5.34e-20	1.88e-17
Ccl6	76.8818	0.824863	0.0922168	8.94482	3.73e-19	1.28e-16
Nefl	47471.9	-0.497544	0.05662	-8.78742	1.53e-18	5.16e-16
Nefh	24729.6	-0.582775	0.0668177	-8.72187	2.74e-18	9.04e-16
Cd109	179.423	0.74845	0.0858698	8.7161	2.88e-18	9.33e-16
S100a6	586.398	0.776424	0.0893057	8.694	3.5e-18	1.11e-15
Tmem176b	875.774	0.51569	0.0601414	8.57463	9.94e-18	3.1e-15
Sel1l3	981.892	0.395875	0.046548	8.50466	1.82e-17	5.57e-15
Sgpl1	1193.85	0.348879	0.0414307	8.42079	3.74e-17	1.12e-14
Clu	17680.8	0.340458	0.0407473	8.35536	6.52e-17	1.92e-14
Csf3r	304.311	0.655977	0.0786178	8.34387	7.19e-17	2.08e-14
Cd180	119.922	0.757785	0.0910024	8.32709	8.29e-17	2.36e-14
Cd9	1488.6	0.586362	0.0710169	8.25665	1.5e-16	4.2e-14
Tgfbr1	949.196	0.429835	0.0521552	8.24147	1.7e-16	4.68e-14
Cx3cr1	1278.33	0.476818	0.0582303	8.1885	2.65e-16	7.16e-14
Xpo1	2578.09	0.40032	0.0494337	8.09812	5.58e-16	1.49e-13
Pcyt1b	2377	-0.347557	0.0434324	-8.00224	1.22e-15	3.2e-13
Fyb	188.961	0.642331	0.0803355	7.99561	1.29e-15	3.33e-13
Susd2	1902.72	-0.423458	0.0534659	-7.92014	2.37e-15	6.02e-13
Fcgr2b	97.2024	0.716888	0.0905332	7.91851	2.4e-15	6.02e-13
Inpp5d	380.393	0.487096	0.0620214	7.85369	4.04e-15	9.96e-13
Nefm	43689	-0.518644	0.0660714	-7.84975	4.17e-15	1.01e-12
S1pr3	238.489	0.656861	0.0838257	7.83603	4.65e-15	1.11e-12
Ccl9	60.0593	0.721464	0.0921491	7.82931	4.91e-15	1.16e-12
Aldh1l2	713.028	0.551783	0.0710023	7.77134	7.77e-15	1.81e-12
Cd63	1284.13	0.476478	0.0617252	7.71935	1.17e-14	2.68e-12
Fcgr3	315.59	0.593936	0.0775847	7.65532	1.93e-14	4.36e-12
Man2b1	1433.04	0.3348	0.0438004	7.64376	2.11e-14	4.71e-12
Gusb	555.814	0.413402	0.0545549	7.57773	3.52e-14	7.75e-12
Fcer1g	179.382	0.627396	0.0829462	7.56388	3.91e-14	8.5e-12
Dock2	182.069	0.623155	0.082768	7.52895	5.12e-14	1.1e-11
Ccl4	14.0602	0.565645	0.0754098	7.50095	6.34e-14	1.34e-11
Kcnj14	486.893	-0.64979	0.0869556	-7.47267	7.86e-14	1.63e-11
Ggta1	176.024	0.63563	0.0850682	7.472	7.9e-14	1.63e-11
Rasal3	124.837	0.625183	0.0845149	7.39731	1.39e-13	2.83e-11
Cd52	72.862	0.658182	0.0908608	7.24385	4.36e-13	8.79e-11
Ccdc92	4056.09	-0.281122	0.0388733	-7.23176	4.77e-13	9.49e-11
Fxyd7	1021.23	-0.4357	0.060339	-7.22086	5.17e-13	1.02e-10
Itgb5	1804.45	0.341023	0.0473988	7.19477	6.26e-13	1.22e-10
Slc11a1	104.807	0.659881	0.0918428	7.18489	6.73e-13	1.29e-10
Arpc1b	596.808	0.53677	0.0751774	7.14005	9.33e-13	1.77e-10
Tnfrsf1a	568.17	0.424833	0.0598416	7.09929	1.25e-12	2.35e-10
Egr1	810.932	0.4699	0.0664718	7.06916	1.56e-12	2.89e-10
Mest	605.594	-0.388977	0.0551015	-7.05929	1.67e-12	3.07e-10
Dhcr24	5438.77	-0.309101	0.043807	-7.05599	1.71e-12	3.11e-10
Lilrb4a	34.3373	0.565326	0.0809736	6.98161	2.92e-12	5.24e-10
Lrrc49	3036.42	-0.341598	0.0493027	-6.92858	4.25e-12	7.55e-10
Capg	156.943	0.622999	0.0906844	6.86997	6.42e-12	1.13e-09
Pdgfd	666.541	-0.471472	0.0687165	-6.86112	6.83e-12	1.19e-09
Dffa	2456.28	-0.421397	0.0618017	-6.81853	9.2e-12	1.58e-09
Cyba	126.152	0.58995	0.0865652	6.8151	9.42e-12	1.6e-09
Anxa3	315.491	0.497393	0.0733084	6.78494	1.16e-11	1.96e-09
Hexa	1390.17	0.32588	0.0480715	6.77908	1.21e-11	2.02e-09
Cyth4	320.1	0.531702	0.0785489	6.76906	1.3e-11	2.1e-09
Slc10a4	479.569	-0.567703	0.0838585	-6.76978	1.29e-11	2.1e-09
Cd22	21.0395	0.579878	0.085663	6.7693	1.29e-11	2.1e-09
Erbin	4530.61	0.285931	0.0426978	6.69662	2.13e-11	3.42e-09
Tacr1	443.794	-0.396999	0.0594158	-6.68171	2.36e-11	3.75e-09
Hk2	136.73	0.575506	0.0862444	6.67297	2.51e-11	3.94e-09
Tmem63c	1301.49	-0.317288	0.0476635	-6.65685	2.8e-11	4.36e-09
Pld4	323.744	0.516732	0.0778306	6.63919	3.15e-11	4.87e-09
Hmox1	185.177	0.497043	0.0749092	6.63528	3.24e-11	4.95e-09
Irf8	187.404	0.591852	0.0893268	6.62569	3.46e-11	5.24e-09
Pik3ap1	137.475	0.557152	0.084119	6.62337	3.51e-11	5.27e-09
Sulf1	533.441	0.417711	0.0633186	6.59697	4.2e-11	6.19e-09
Slc5a3	1128.99	0.364105	0.0551818	6.59827	4.16e-11	6.19e-09
Ankrd35	918.66	-0.363842	0.055335	-6.57525	4.86e-11	7.1e-09
Itga5	114.657	0.603333	0.0917814	6.57359	4.91e-11	7.12e-09
Pdpn	219.534	0.540526	0.0823994	6.55982	5.39e-11	7.74e-09
Fgf21	12.2514	0.430449	0.065702	6.55155	5.69e-11	8.11e-09
Tmem176a	410.704	0.521914	0.0797781	6.54207	6.07e-11	8.57e-09
Ptx3	30.063	0.555161	0.085001	6.53122	6.52e-11	9.13e-09
Axl	2149.21	0.295364	0.0454769	6.49482	8.31e-11	1.15e-08
Ccdc85c	2335.72	-0.282938	0.0437971	-6.46021	1.05e-10	1.44e-08
Vav1	123.474	0.54023	0.0838151	6.44549	1.15e-10	1.57e-08
Aspg	154.947	0.570898	0.0889373	6.4191	1.37e-10	1.83e-08
Slc18a3	1169.78	-0.487295	0.0759145	-6.41899	1.37e-10	1.83e-08
Cybb	50.7359	0.577121	0.0898817	6.42089	1.35e-10	1.83e-08
Top2a	57.3601	0.579425	0.0904511	6.40594	1.49e-10	1.98e-08
Bin2	165.673	0.523329	0.0820708	6.37655	1.81e-10	2.37e-08
Hcls1	156.97	0.553871	0.0871577	6.35482	2.09e-10	2.71e-08
Adgre1	143.937	0.551233	0.0870127	6.33509	2.37e-10	3.06e-08
Slc15a3	129.449	0.522333	0.0825062	6.33084	2.44e-10	3.12e-08
Tlr7	98.1584	0.571113	0.0902968	6.32483	2.54e-10	3.22e-08
Unc93b1	477.353	0.424007	0.0671772	6.31177	2.76e-10	3.46e-08
Plau	86.1361	0.582605	0.092307	6.3116	2.76e-10	3.46e-08
Ftl1	5286.1	0.286477	0.0454624	6.30141	2.95e-10	3.66e-08
Lyz2	527.428	0.569215	0.0903713	6.29863	3e-10	3.7e-08
A2m	2868.42	0.549036	0.087477	6.27635	3.47e-10	4.24e-08
B2m	2300.5	0.341601	0.0545335	6.26406	3.75e-10	4.56e-08
Tcirg1	668.754	0.342203	0.0547709	6.2479	4.16e-10	5.02e-08
Golm1	521.976	0.349915	0.0561412	6.23278	4.58e-10	5.49e-08
Bcl3	48.9919	0.563713	0.0904624	6.23146	4.62e-10	5.49e-08
Crym	20.6914	0.518671	0.0834867	6.21262	5.21e-10	6.15e-08
Grin3b	260.858	-0.515788	0.0832358	-6.19671	5.77e-10	6.76e-08
Spi1	83.4145	0.551024	0.0890938	6.18476	6.22e-10	7.24e-08
Slamf9	35.7435	0.563234	0.0911887	6.17658	6.55e-10	7.57e-08
Arhgdib	169.33	0.490021	0.0793617	6.17452	6.64e-10	7.61e-08
Plxdc1	658.035	-0.345081	0.0560108	-6.16097	7.23e-10	8.24e-08
Naip2	58.7197	0.567968	0.0922104	6.15948	7.3e-10	8.26e-08
Pcp4l1	6027.34	-0.224123	0.0364435	-6.14988	7.75e-10	8.72e-08
Patj	2288.09	-0.285151	0.0465121	-6.13067	8.75e-10	9.77e-08
Ctsc	295.347	0.51026	0.0834213	6.11666	9.56e-10	1.06e-07
Ctsh	366.3	0.521506	0.0855168	6.09828	1.07e-09	1.18e-07
Ptpn6	155.094	0.501457	0.0825477	6.07476	1.24e-09	1.36e-07
S100a4	47.5245	0.533896	0.0880198	6.06563	1.31e-09	1.43e-07
Lsm11	1354.06	-0.280725	0.0463315	-6.05906	1.37e-09	1.48e-07
Arhgap45	308.831	0.4945	0.0816525	6.05615	1.39e-09	1.5e-07
P2ry6	62.7859	0.555616	0.0920835	6.03383	1.6e-09	1.71e-07
Csf1	1580.02	0.355093	0.0589073	6.028	1.66e-09	1.76e-07
Ikzf1	121.871	0.515224	0.0854934	6.02647	1.68e-09	1.76e-07
Tlr2	140.947	0.529934	0.0880626	6.0177	1.77e-09	1.85e-07
Slc39a14	1187.41	0.313818	0.0522559	6.00541	1.91e-09	1.98e-07
Hpgd	250.842	0.478983	0.0799302	5.99251	2.07e-09	2.13e-07
Prdx6	7155.16	0.299793	0.050161	5.97662	2.28e-09	2.34e-07
Cebpd	84.1699	0.551167	0.0923137	5.97058	2.36e-09	2.41e-07
Ppl	28.3582	0.501871	0.0844555	5.94243	2.81e-09	2.85e-07
Fos	367.61	0.45281	0.0763649	5.92955	3.04e-09	3.04e-07
Tesc	427.611	-0.432802	0.0729924	-5.9294	3.04e-09	3.04e-07
Ccn1	138.875	0.546711	0.0922351	5.92737	3.08e-09	3.06e-07
Rspo2	179.149	-0.520729	0.0882253	-5.90227	3.59e-09	3.53e-07
Tent5c	61.9422	0.542213	0.0918636	5.90237	3.58e-09	3.53e-07
Kcns3	552.2	-0.326005	0.0552505	-5.9005	3.62e-09	3.54e-07
Cd14	88.0936	0.535569	0.0908881	5.89262	3.8e-09	3.69e-07
Vipr2	127.659	-0.541534	0.09199	-5.88688	3.94e-09	3.8e-07
Ccn5	23.2481	0.417178	0.0709319	5.88139	4.07e-09	3.91e-07
Col27a1	702.406	0.440054	0.0749129	5.87421	4.25e-09	4.03e-07
Flnc	997.517	0.542601	0.0923552	5.87516	4.22e-09	4.03e-07
Slc39a1	860.743	0.304476	0.0519058	5.86594	4.47e-09	4.22e-07
1110008P14Rik	1326.75	-0.308539	0.0526258	-5.86289	4.55e-09	4.27e-07
Fndc4	2716.85	-0.246893	0.0423145	-5.83471	5.39e-09	5.01e-07
Hspb1	619.413	0.454681	0.0779303	5.83446	5.4e-09	5.01e-07
Vim	2602.14	0.529618	0.090921	5.82504	5.71e-09	5.27e-07
Ncf1	209.996	0.48294	0.0829754	5.82028	5.88e-09	5.39e-07
Hspa12a	7430.66	-0.209452	0.0360479	-5.81039	6.23e-09	5.69e-07
Itih3	3957.39	-0.410738	0.07112	-5.77528	7.68e-09	6.97e-07
Elf4	57.3433	0.532005	0.0922229	5.76869	7.99e-09	7.21e-07
Ckb	41655.7	-0.178904	0.0311264	-5.74766	9.05e-09	8.12e-07
Lgals3bp	810.596	0.412671	0.0719038	5.7392	9.51e-09	8.5e-07
Impdh1	1347.42	-0.265529	0.0462863	-5.73667	9.66e-09	8.58e-07
Ednrb	2351.19	0.397057	0.0692261	5.73565	9.71e-09	8.58e-07
Lair1	268.336	0.389359	0.0680621	5.72064	1.06e-08	9.33e-07
Cd53	170.164	0.477421	0.083522	5.71612	1.09e-08	9.53e-07
Tead1	758.807	0.333069	0.0585156	5.69198	1.26e-08	1.09e-06
Lat2	111.049	0.485569	0.0853427	5.68964	1.27e-08	1.1e-06
Gstm7	1260.02	-0.305647	0.0537374	-5.68778	1.29e-08	1.11e-06
Tagln2	419.274	0.459026	0.0809882	5.66781	1.45e-08	1.24e-06
Stbd1	80.3938	0.517503	0.0914765	5.65722	1.54e-08	1.31e-06
D17H6S56E-5	82.8882	0.517077	0.0916376	5.64263	1.67e-08	1.41e-06
Ggt5	166.392	0.504825	0.0894689	5.64246	1.68e-08	1.41e-06
Gpr84	35.3437	0.515227	0.0913693	5.63895	1.71e-08	1.43e-06
Tlr13	79.373	0.511001	0.0907295	5.63215	1.78e-08	1.49e-06
Arhgef4	8318.69	-0.182412	0.0324254	-5.62558	1.85e-08	1.53e-06
Arl16	653.544	-0.339585	0.0603866	-5.62352	1.87e-08	1.55e-06
Slc7a8	551.274	0.304195	0.0541065	5.62215	1.89e-08	1.55e-06
Rimkla	2792.31	-0.278216	0.0495059	-5.61985	1.91e-08	1.56e-06
Blnk	61.1277	0.518467	0.0923303	5.61535	1.96e-08	1.6e-06
Palld	326.225	0.41043	0.0731034	5.61438	1.97e-08	1.6e-06
Tpd52l1	376.229	-0.37965	0.0676665	-5.6106	2.02e-08	1.62e-06
Pdlim4	250.918	0.435501	0.0776334	5.60971	2.03e-08	1.63e-06
Fabp7	743.646	0.414652	0.0740923	5.59642	2.19e-08	1.75e-06
Nrg1	1167.82	-0.302676	0.0541876	-5.5857	2.33e-08	1.85e-06
Prune2	7080.89	-0.202344	0.0362871	-5.5762	2.46e-08	1.94e-06
Esyt1	2995.32	-0.234227	0.0421218	-5.56071	2.69e-08	2.11e-06
Dock8	185.825	0.452449	0.081522	5.55002	2.86e-08	2.24e-06
Capn3	140.431	0.461893	0.0833076	5.54444	2.95e-08	2.3e-06
Tgm1	17.0055	0.409872	0.0740035	5.53855	3.05e-08	2.37e-06
Aif1	110.625	0.483806	0.0877724	5.51205	3.55e-08	2.74e-06
Lyn	201.472	0.439534	0.0801066	5.48686	4.09e-08	3.14e-06
Cd86	58.4744	0.503631	0.0919903	5.47482	4.38e-08	3.35e-06
Clvs1	1761.55	-0.277351	0.0508211	-5.45741	4.83e-08	3.68e-06
Frmpd3	1622.61	-0.23654	0.0433665	-5.45444	4.91e-08	3.72e-06
Arhgap25	81.7569	0.495892	0.0910254	5.44784	5.1e-08	3.85e-06
Rbp1	222.805	0.502262	0.0922688	5.44347	5.23e-08	3.92e-06
Gpam	3281.29	0.227653	0.0419631	5.42507	5.79e-08	4.33e-06
Diras2	3431.63	-0.19091	0.0351988	-5.42376	5.84e-08	4.34e-06
Aqp4	16064.3	0.320825	0.0595532	5.3872	7.16e-08	5.3e-06
Galnt9	1520.59	-0.281323	0.0522384	-5.38538	7.23e-08	5.33e-06
Tjp1	3496.58	0.210308	0.0392442	5.35895	8.37e-08	6.15e-06
Atp1a1	10632.8	-0.289675	0.054218	-5.34278	9.15e-08	6.69e-06
St3gal5	1693.64	-0.209819	0.0394531	-5.31819	1.05e-07	7.63e-06
Vwa7	717.09	-0.336461	0.0634775	-5.30048	1.15e-07	8.33e-06
Epb41l3	15663.8	-0.220285	0.0415541	-5.30117	1.15e-07	8.33e-06
Anxa6	4682.22	-0.251745	0.047525	-5.29711	1.18e-07	8.45e-06
Ccdc190	408.236	0.389782	0.0737432	5.28567	1.25e-07	8.96e-06
Siglecf	28.2494	0.455145	0.0861504	5.28314	1.27e-07	9.04e-06
F11r	278.097	0.368881	0.0698932	5.27779	1.31e-07	9.27e-06
Gfm2	1444.96	0.276112	0.0523616	5.27317	1.34e-07	9.47e-06
Fbxo31	3493.44	-0.232446	0.0441244	-5.26798	1.38e-07	9.7e-06
Cd300c2	89.9335	0.476382	0.0908402	5.24418	1.57e-07	1.1e-05
Ssc5d	162.469	0.474139	0.090481	5.2402	1.6e-07	1.12e-05
Selplg	745.471	0.323244	0.061932	5.21934	1.8e-07	1.25e-05
Slc16a6	806.454	0.302323	0.05796	5.21607	1.83e-07	1.26e-05
Pbxip1	2994.38	0.209597	0.0401965	5.21431	1.85e-07	1.27e-05
Hk3	73.6968	0.472003	0.0905391	5.21325	1.86e-07	1.27e-05
Cgnl1	3411.15	-0.220883	0.0425866	-5.18668	2.14e-07	1.46e-05
Slco4a1	191.987	-0.437966	0.0845726	-5.17859	2.24e-07	1.52e-05
Ildr2	1140.45	0.270271	0.0521921	5.17839	2.24e-07	1.52e-05
Rab3b	636.471	-0.293346	0.0566569	-5.17759	2.25e-07	1.52e-05
Apoe	32922.9	0.247523	0.0478241	5.1757	2.27e-07	1.52e-05
Asic1	2355.75	-0.211982	0.0409875	-5.17186	2.32e-07	1.55e-05
Pld2	917.471	0.25305	0.0489499	5.16957	2.35e-07	1.56e-05
Runx1	51.8067	0.47101	0.0911339	5.16832	2.36e-07	1.57e-05
Ifitm10	1105.74	-0.284795	0.0551534	-5.1637	2.42e-07	1.6e-05
Lcp2	78.5228	0.459463	0.0891877	5.15164	2.58e-07	1.7e-05
Il1rn	6.90776	0.31141	0.0606706	5.1328	2.85e-07	1.87e-05
Bcl2a1b	22.1251	0.441253	0.0859691	5.13269	2.86e-07	1.87e-05
Ifi30	99.9646	0.456528	0.0890635	5.12586	2.96e-07	1.93e-05
Mmp15	1481.32	-0.296083	0.0579264	-5.11137	3.2e-07	2.07e-05
Kif5b	13981.9	-0.246364	0.0482604	-5.1049	3.31e-07	2.14e-05
Kcnab1	3360.74	-0.251846	0.0494064	-5.09743	3.44e-07	2.2e-05
Emp3	81.8708	0.470739	0.0923435	5.0977	3.44e-07	2.2e-05
Phactr1	4333.66	-0.16381	0.0321768	-5.09093	3.56e-07	2.27e-05
Plin2	429.57	0.360626	0.0708869	5.08734	3.63e-07	2.31e-05
Kirrel2	114.666	-0.467047	0.0918478	-5.08501	3.68e-07	2.33e-05
Csf2rb	54.7706	0.468427	0.0921403	5.08385	3.7e-07	2.33e-05
Eml1	4420.13	-0.320052	0.0630338	-5.07747	3.82e-07	2.4e-05
Ly9	22.9254	0.430996	0.0849167	5.07551	3.86e-07	2.42e-05
Fam102b	731.593	0.335687	0.0663262	5.06115	4.17e-07	2.6e-05
Arhgap30	129.791	0.421118	0.0834534	5.04614	4.51e-07	2.8e-05
Ndst1	3379.19	0.198059	0.0392733	5.0431	4.58e-07	2.83e-05
Kcng4	2836.37	-0.380579	0.0754708	-5.04273	4.59e-07	2.83e-05
Syndig1l	439.673	-0.323696	0.0642742	-5.03617	4.75e-07	2.92e-05
Tab2	1688.9	0.198981	0.0395518	5.03091	4.88e-07	2.99e-05
Casp12	86.4923	0.46387	0.0923406	5.02347	5.07e-07	3.09e-05
Sbno2	781.616	0.353095	0.0703113	5.02187	5.12e-07	3.11e-05
Hcar2	9.8253	0.343425	0.0685558	5.00942	5.46e-07	3.3e-05
Paqr9	1772.57	-0.197117	0.0394047	-5.00239	5.66e-07	3.41e-05
Plcg2	191.597	0.373617	0.0747215	5.00013	5.73e-07	3.44e-05
Adam23	7607.71	-0.230757	0.0462275	-4.99177	5.98e-07	3.58e-05
Socs3	91.1498	0.443032	0.088907	4.9831	6.26e-07	3.73e-05
Kcnk9	4237.41	-0.298808	0.0600166	-4.97875	6.4e-07	3.8e-05
Tifab	93.5689	0.447736	0.0900063	4.9745	6.54e-07	3.87e-05
Emp1	215.346	0.446876	0.0899027	4.97066	6.67e-07	3.94e-05
Lrsam1	1759.11	-0.24493	0.0493102	-4.96713	6.8e-07	3.98e-05
Grid2ip	412.32	-0.335119	0.067465	-4.9673	6.79e-07	3.98e-05
Ccdc88c	1145.52	-0.228012	0.045913	-4.96616	6.83e-07	3.99e-05
Hck	80.6225	0.445341	0.0899827	4.94919	7.45e-07	4.34e-05
Map1b	44100.2	-0.239269	0.0484706	-4.93638	7.96e-07	4.61e-05
Ankrd6	1157.83	-0.228311	0.0463	-4.93113	8.18e-07	4.72e-05
Cd44	510.529	0.454622	0.0922146	4.93004	8.22e-07	4.73e-05
Fbxo2	3066.88	-0.244861	0.0497578	-4.92107	8.61e-07	4.94e-05
Cpne6	1942.1	-0.256738	0.0522085	-4.91755	8.76e-07	4.99e-05
Ampd3	1043.47	0.20932	0.0425638	4.9178	8.75e-07	4.99e-05
Camk1d	4146.62	-0.232008	0.0471925	-4.9162	8.82e-07	5.01e-05
Cdh6	794.197	-0.321349	0.0653896	-4.91438	8.91e-07	5.04e-05
Cd34	735.786	0.325453	0.066491	4.89469	9.85e-07	5.53e-05
Stat3	2436.12	0.215374	0.0440011	4.89474	9.84e-07	5.53e-05
Clic1	279.667	0.41271	0.08447	4.88588	1.03e-06	5.77e-05
Mki67	66.8478	0.424089	0.0868294	4.88416	1.04e-06	5.8e-05
Mvp	455.002	0.343942	0.070548	4.87529	1.09e-06	6.04e-05
Ppp2r2b	2483.17	-0.222236	0.0457911	-4.85325	1.21e-06	6.73e-05
Tubb4b	8657.74	-0.208741	0.0430383	-4.85013	1.23e-06	6.82e-05
Adcy7	789.739	0.248372	0.0512306	4.84813	1.25e-06	6.86e-05
P4ha3	457.329	0.374558	0.0773554	4.84204	1.29e-06	7.05e-05
Hpgds	162.402	0.399175	0.0825265	4.83692	1.32e-06	7.21e-05
Cd37	97.938	0.421537	0.087203	4.83398	1.34e-06	7.3e-05
Csf2rb2	39.8111	0.439084	0.0909162	4.82955	1.37e-06	7.44e-05
Kcnk3	883.322	-0.251092	0.0520983	-4.81959	1.44e-06	7.77e-05
Sash3	59.5733	0.442631	0.0918291	4.82016	1.43e-06	7.77e-05
Naip5	60.0144	0.440402	0.0916384	4.80587	1.54e-06	8.29e-05
Gfap	56289.5	0.436406	0.0908255	4.80488	1.55e-06	8.31e-05
Irf9	351.051	0.330209	0.0687861	4.80052	1.58e-06	8.46e-05
Acly	11839.9	-0.255031	0.053212	-4.79274	1.65e-06	8.77e-05
Fcgr1	88.7467	0.426717	0.0891125	4.78851	1.68e-06	8.93e-05
Cd33	143.4	0.410592	0.0859402	4.77764	1.77e-06	9.39e-05
Spint1	37.6634	0.429741	0.0899714	4.77642	1.78e-06	9.42e-05
Sh3bgr	520.762	-0.368343	0.0771803	-4.7725	1.82e-06	9.57e-05
Car5b	222.51	0.3963	0.0832642	4.75955	1.94e-06	0.00010177
Tmem119	479.967	0.32972	0.0695349	4.74179	2.12e-06	0.000110757
Tbxas1	85.4201	0.427974	0.090399	4.73428	2.2e-06	0.000114579
Rgs1	9.06102	0.289317	0.0611942	4.72785	2.27e-06	0.000117896
Npnt	167.582	0.396523	0.0842336	4.70742	2.51e-06	0.000129934
Cd48	22.4025	0.389094	0.0827162	4.70396	2.55e-06	0.000131741
Cotl1	1676.71	0.187195	0.039821	4.70092	2.59e-06	0.000133306
Ch25h	24.8158	0.368491	0.0784273	4.69851	2.62e-06	0.000134467
Jak1	5294.74	-0.18049	0.0384314	-4.69643	2.65e-06	0.000135003
Mnx1	37.3289	-0.424382	0.0903515	-4.69701	2.64e-06	0.000135003
Rac2	87.7291	0.426957	0.0909533	4.69424	2.68e-06	0.000136038
Hebp2	432.321	-0.317394	0.067626	-4.69337	2.69e-06	0.0001362
Plxnb2	2000.24	0.285968	0.0609548	4.69147	2.71e-06	0.000137053
Pdcd1	10.397	0.301128	0.0643204	4.68168	2.85e-06	0.000143325
Vsir	1045.06	0.252227	0.0539072	4.67891	2.88e-06	0.000144831
Arsb	2184.32	0.211782	0.0453513	4.66981	3.01e-06	0.00015094
Masp1	491.1	0.293199	0.0628118	4.6679	3.04e-06	0.000151888
Bmp2k	934.149	0.232914	0.0499812	4.66002	3.16e-06	0.000157343
1700040D17Rik	367.552	-0.31733	0.0682967	-4.64634	3.38e-06	0.000166752
Slco2b1	702.374	0.322999	0.0695013	4.64738	3.36e-06	0.000166752
Iqgap3	25.714	0.385546	0.0829809	4.6462	3.38e-06	0.000166752
Carmil2	1743.08	-0.239088	0.0515184	-4.64082	3.47e-06	0.00017064
Pcdhgc3	1356.46	0.210665	0.0454013	4.64008	3.48e-06	0.00017075
Hapln2	3732.75	-0.229034	0.0493732	-4.63883	3.5e-06	0.000171272
Pcdhgc5	295.114	0.403712	0.0870754	4.63635	3.55e-06	0.00017283
Tnfrsf1b	185.743	0.35492	0.0766266	4.63181	3.62e-06	0.000176142
Pacsin3	1184.18	-0.258005	0.0557342	-4.62921	3.67e-06	0.000177847
Aqp6	69.434	-0.425959	0.0921795	-4.62097	3.82e-06	0.000184521
Il10ra	210.326	0.370487	0.0803104	4.61319	3.97e-06	0.000191011
Polr3g	254.14	-0.365006	0.0791532	-4.61138	4e-06	0.000191559
Hbegf	449.968	0.34483	0.074777	4.61144	4e-06	0.000191559
Pik3cg	112.264	0.395091	0.0863614	4.57485	4.77e-06	0.000227564
S100a10	689.563	0.304138	0.066558	4.56952	4.89e-06	0.000232751
Met	177.425	0.377689	0.0827749	4.56284	5.05e-06	0.000239601
Glipr2	265.972	0.37843	0.083017	4.55846	5.15e-06	0.000243945
Gpr137	2610.24	-0.175399	0.0385702	-4.54752	5.43e-06	0.000256243
Fgf1	7506.7	-0.302996	0.0667561	-4.53885	5.66e-06	0.000266237
Gns	2869.19	0.132933	0.0293344	4.53163	5.85e-06	0.000274725
Pigz	661.069	-0.232021	0.0512212	-4.52979	5.9e-06	0.000276351
Add3	3319	0.129616	0.0286288	4.52747	5.97e-06	0.000278609
Klc1	15499.7	-0.143605	0.0317592	-4.52169	6.13e-06	0.000285524
Abca1	1331.33	0.28584	0.0632346	4.52031	6.17e-06	0.000285779
Ltbr	340.215	0.32891	0.0727592	4.52052	6.17e-06	0.000285779
Ecel1	1176.24	0.291264	0.0645563	4.51178	6.43e-06	0.000296678
Hmgn1	967.137	0.256455	0.0568678	4.50967	6.49e-06	0.00029882
Fmo1	122.567	0.413524	0.091743	4.50742	6.56e-06	0.000301161
Slc29a4	1067.61	-0.227653	0.0505497	-4.50354	6.68e-06	0.00030586
Tmem47	3422.13	0.154562	0.0343317	4.50203	6.73e-06	0.000307136
Synpo	643.959	0.285351	0.0633903	4.50149	6.75e-06	0.000307136
Gm45916	353.738	0.316955	0.0704343	4.50001	6.8e-06	0.000308431
Klc2	8844.1	-0.177611	0.0395006	-4.4964	6.91e-06	0.000312842
Fermt3	180.517	0.36655	0.0817065	4.48618	7.25e-06	0.000327338
Odc1	2348.38	0.222026	0.0495053	4.4849	7.29e-06	0.000328406
Gpc1	3002.37	-0.183767	0.04102	-4.47993	7.47e-06	0.000334319
Slc44a2	1426.86	0.184178	0.0411111	4.48001	7.46e-06	0.000334319
B4galt1	171.401	0.372173	0.0831007	4.47858	7.51e-06	0.000335534
Necab3	1188.15	-0.245612	0.0549058	-4.47334	7.7e-06	0.000342939
Lhx4	67.815	-0.407595	0.0911363	-4.47237	7.74e-06	0.00034357
C5ar1	24.228	0.388817	0.0872467	4.45653	8.33e-06	0.00036896
Plekhd1	852.729	-0.243186	0.0546778	-4.44762	8.68e-06	0.000383564
Ifi204	20.266	0.35475	0.0798124	4.4448	8.8e-06	0.000387596
Cxcl16	94.9249	0.405249	0.091224	4.44235	8.9e-06	0.000389966
Mrvi1	248.585	-0.383754	0.0863767	-4.44279	8.88e-06	0.000389966
Ms4a6c	26.2698	0.369844	0.0832978	4.44002	9e-06	0.000393163
Stmn2	8896.97	-0.213706	0.048191	-4.43456	9.23e-06	0.000402203
Cnn3	3973.55	0.274585	0.0619875	4.42968	9.44e-06	0.00041033
Kcnc3	17027.2	-0.256857	0.0579953	-4.42893	9.47e-06	0.000410675
Pla2g15	393.419	0.271416	0.0613987	4.42055	9.85e-06	0.000425816
Fblim1	81.8292	0.404294	0.0915678	4.41524	1.01e-05	0.000435253
Treml2	14.3496	0.331779	0.0752162	4.41101	1.03e-05	0.000442693
Cdh22	1077.59	-0.262941	0.05963	-4.40954	1.04e-05	0.000444545
Apbb1ip	175.696	0.391429	0.088791	4.40843	1.04e-05	0.000445669
Apbb1	8706.07	-0.158784	0.0360664	-4.40254	1.07e-05	0.000456774
Ccdc124	1212.48	-0.183763	0.0417577	-4.40069	1.08e-05	0.0004595
Fes	149.864	0.369449	0.0839902	4.39871	1.09e-05	0.000462508
Kctd17	2674.25	-0.202415	0.046075	-4.39317	1.12e-05	0.000473254
Pros1	612.412	0.249639	0.0568453	4.39155	1.13e-05	0.000475561
Brsk1	8400.84	-0.169066	0.0385273	-4.3882	1.14e-05	0.000481722
Cdr2	1657.65	-0.206384	0.0470636	-4.38522	1.16e-05	0.000487123
Trib1	227.728	0.361899	0.0826633	4.37799	1.2e-05	0.00050228
Mlxipl	141.353	0.371724	0.0849581	4.37538	1.21e-05	0.000507044
Fam129b	1326.19	0.260973	0.0596675	4.37379	1.22e-05	0.000507655
Pycard	61.6842	0.402432	0.0920006	4.37423	1.22e-05	0.000507655
Il6st	4049.86	0.239088	0.0546678	4.37347	1.22e-05	0.000507655
Dock7	1148.88	0.266172	0.0608736	4.37254	1.23e-05	0.000508525
Chrm2	619.108	-0.305136	0.0700491	-4.35603	1.32e-05	0.000547056
Ppp1r1b	1224.52	-0.261115	0.0600857	-4.3457	1.39e-05	0.000572013
Dexi	1296.75	-0.234533	0.0540141	-4.34206	1.41e-05	0.000580129
Gpr34	226.572	0.345949	0.0797645	4.33713	1.44e-05	0.000591816
Pabpc1	2527.21	0.176333	0.0406873	4.33386	1.47e-05	0.000599208
Fxyd1	1033.8	0.296862	0.0685139	4.33287	1.47e-05	0.000599567
Cyp4v3	247.424	0.315037	0.0727125	4.33264	1.47e-05	0.000599567
Stat6	292.177	0.351014	0.0811123	4.3275	1.51e-05	0.000612208
Palm3	251.267	-0.3557	0.0822345	-4.32544	1.52e-05	0.000616455
Gm16596	800.627	-0.295741	0.0684189	-4.3225	1.54e-05	0.000623201
Itih5	2273.38	0.306291	0.0709391	4.31766	1.58e-05	0.000635463
Tlr1	25.1174	0.361183	0.0837287	4.31373	1.61e-05	0.000645294
Plekhm2	4419.41	-0.191867	0.0445163	-4.31004	1.63e-05	0.000654551
Sirpa	4280.53	0.173983	0.0404484	4.30136	1.7e-05	0.000679081
Htr7	599.226	-0.250397	0.05834	-4.29204	1.77e-05	0.000706542
Hecw2	1191.68	-0.198861	0.0463505	-4.29039	1.78e-05	0.000710101
Rhoc	380.23	0.303378	0.0707463	4.28825	1.8e-05	0.000715233
Trim25	288.137	0.2826	0.0660702	4.27726	1.89e-05	0.000749654
Marcks	2047.16	0.281914	0.0659261	4.27621	1.9e-05	0.000751051
Parva	4175.1	-0.155176	0.0362918	-4.27578	1.9e-05	0.000751051
Efna3	589.732	-0.224208	0.0526813	-4.25593	2.08e-05	0.000818942
Prss12	262.128	-0.314679	0.0739569	-4.2549	2.09e-05	0.000820788
Amotl1	1930.6	0.253667	0.0596295	4.25405	2.1e-05	0.000821945
Nnat	2054.01	0.334759	0.0787047	4.25335	2.11e-05	0.00082256
Npb	59.9155	-0.391996	0.0922456	-4.24949	2.14e-05	0.000834914
Nfya	431.104	0.272697	0.0642263	4.24588	2.18e-05	0.000846474
Flrt2	585.149	-0.251416	0.059259	-4.24266	2.21e-05	0.000856688
Prss23	202.972	0.364582	0.0859683	4.24089	2.23e-05	0.000861463
Cadm3	8459.92	-0.156047	0.0368277	-4.23721	2.26e-05	0.000869587
Slit2	1556.49	-0.212848	0.0502258	-4.23781	2.26e-05	0.000869587
Rnase4	328.546	0.323954	0.0764476	4.23759	2.26e-05	0.000869587
Mrps6	410.915	0.277386	0.0655093	4.2343	2.29e-05	0.00087887
Lgr6	167.267	-0.355964	0.0841194	-4.23165	2.32e-05	0.00088722
Lingo4	936.46	-0.311664	0.073807	-4.22269	2.41e-05	0.000921126
Cmtm6	879.205	0.250168	0.0592658	4.22112	2.43e-05	0.000925432
Fam57b	2672.58	-0.20967	0.0497547	-4.21407	2.51e-05	0.0009526
Uts2b	71.7595	-0.38689	0.0919868	-4.20593	2.6e-05	0.000983025
Slc43a3	45.3293	0.362563	0.0861958	4.20627	2.6e-05	0.000983025
Ptgs1	339.048	0.349512	0.0832899	4.19633	2.71e-05	0.00102235
Serpinf2	8.3612	0.231605	0.0551963	4.19602	2.72e-05	0.00102235
Cmpk2	894.331	-0.200401	0.047819	-4.19082	2.78e-05	0.00104369
Slitrk1	1597.78	-0.158256	0.0378746	-4.17842	2.94e-05	0.00109972
Parvg	94.0164	0.381952	0.0916105	4.1693	3.06e-05	0.00113952
Ywhag	32774.5	-0.146019	0.0350201	-4.16958	3.05e-05	0.00113952
Fgfr4	26.919	0.332082	0.0796966	4.16683	3.09e-05	0.00114933
Srgap1	1142.11	0.1933	0.0464028	4.1657	3.1e-05	0.00115061
Ctsa	3484.76	0.143138	0.0343622	4.16555	3.11e-05	0.00115061
Laptm4b	3838.66	-0.171992	0.0413112	-4.16333	3.14e-05	0.00115926
Neto2	951.969	0.281657	0.0677193	4.15919	3.19e-05	0.00117786
Ncs1	9875.37	-0.160781	0.0386782	-4.15689	3.23e-05	0.0011871
Dnase2a	121.002	0.340181	0.0822543	4.13573	3.54e-05	0.00129911
Nat8l	22163.6	-0.205245	0.0496611	-4.13291	3.58e-05	0.00131225
Mllt11	4386.09	-0.154158	0.0373133	-4.13145	3.6e-05	0.00131476
Arhgap36	850.083	-0.330459	0.0799789	-4.13182	3.6e-05	0.00131476
Gabra5	1293.71	-0.189721	0.0459612	-4.12785	3.66e-05	0.00133259
Flvcr1	564.313	0.233952	0.0567793	4.12038	3.78e-05	0.00137351
Skap2	631.122	0.26606	0.0646379	4.11617	3.85e-05	0.00139577
Rasal2	1998.41	-0.175894	0.042765	-4.11303	3.9e-05	0.00141177
Crtac1	2311.94	-0.189152	0.0460074	-4.11133	3.93e-05	0.00141913
Ppip5k2	1821.46	-0.21592	0.0526385	-4.10195	4.1e-05	0.00147471
Rab29	156.728	0.344333	0.0839885	4.09976	4.14e-05	0.00148544
Entpd3	1302.66	-0.218536	0.0533385	-4.09715	4.18e-05	0.00149903
Kctd12	1473.92	0.227928	0.0556861	4.09308	4.26e-05	0.00152233
Chat	735.256	-0.346096	0.0846256	-4.08973	4.32e-05	0.00154116
Dusp15	1664.83	-0.237447	0.058169	-4.08201	4.46e-05	0.00158979
Calcb	147.787	-0.375654	0.0920411	-4.08137	4.48e-05	0.00159074
S100a11	123.64	0.376137	0.0922113	4.07908	4.52e-05	0.00160307
Ube2o	5265.87	-0.13297	0.0326159	-4.07686	4.56e-05	0.00161168
Mylk	451.004	0.344691	0.0845486	4.07684	4.57e-05	0.00161168
P2rx5	386.963	-0.254667	0.0625986	-4.06825	4.74e-05	0.00166867
Shisal1	841.737	0.289684	0.0712655	4.06486	4.81e-05	0.00168952
Glyat	51.9472	-0.374746	0.0922926	-4.06041	4.9e-05	0.00171839
Habp4	6199.3	-0.164558	0.0405637	-4.05677	4.98e-05	0.00174169
Chst11	1172.37	0.176296	0.0435145	4.05144	5.09e-05	0.00177543
Lnx1	767.553	-0.187814	0.0463646	-4.0508	5.1e-05	0.00177543
Ar	683.49	-0.242141	0.0597722	-4.05106	5.1e-05	0.00177543
Gpr183	31.7137	0.361609	0.0893273	4.04813	5.16e-05	0.00178452
Kif5c	22025.4	-0.16334	0.0403469	-4.0484	5.16e-05	0.00178452
Kcnab2	13933.9	-0.186794	0.0461418	-4.04825	5.16e-05	0.00178452
Acat2	962.039	-0.202704	0.0501547	-4.04158	5.31e-05	0.00182749
Apobec1	83.3479	0.372131	0.0920746	4.04162	5.31e-05	0.00182749
Grid1	1196.48	-0.165661	0.0410063	-4.0399	5.35e-05	0.00183682
Sh3bp2	204.092	0.347407	0.0860196	4.0387	5.37e-05	0.00184237
Syk	128.523	0.368077	0.0912124	4.03538	5.45e-05	0.00186477
Arl11	18.4162	0.316047	0.0784348	4.02943	5.59e-05	0.00190864
P4htm	1628.84	-0.172093	0.0427154	-4.02882	5.61e-05	0.00190962
Lsp1	104.745	0.36507	0.0908179	4.0198	5.82e-05	0.00198018
Bcan	9965.53	-0.148293	0.0370032	-4.00756	6.13e-05	0.00207779
Plaur	20.9863	0.324265	0.0809149	4.00748	6.14e-05	0.00207779
Prelp	955.065	0.306401	0.076485	4.00603	6.17e-05	0.00208492
Nell1	1040.24	-0.234978	0.0586609	-4.0057	6.18e-05	0.00208492
Tmem229b	2284.86	-0.223994	0.0559582	-4.00287	6.26e-05	0.00210574
Them6	1645.74	-0.225446	0.0563335	-4.00199	6.28e-05	0.00210933
C3	2967.72	0.357709	0.08943	3.99988	6.34e-05	0.0021238
Eef1a1	33640.8	0.152858	0.0382202	3.99941	6.35e-05	0.0021238
Tec	93.4865	0.369322	0.0923556	3.99891	6.36e-05	0.00212399
Hcn2	8705.98	-0.237424	0.0594455	-3.99397	6.5e-05	0.00216434
Chl1	2692.2	0.212934	0.0533515	3.99115	6.58e-05	0.00218585
Rell2	4794.02	-0.184638	0.0463228	-3.98591	6.72e-05	0.00223019
Itpripl2	282.814	0.336506	0.0844752	3.98349	6.79e-05	0.00224855
Cptp	853.272	-0.219222	0.0550539	-3.98196	6.83e-05	0.00224956
Mgst3	1495.07	-0.227266	0.0570671	-3.98243	6.82e-05	0.00224956
Ifi207	14.9503	0.303093	0.0761081	3.9824	6.82e-05	0.00224956
Mdfic	90.2279	0.35768	0.089869	3.98001	6.89e-05	0.00226353
Camk2g	11083.8	-0.139824	0.0351488	-3.97806	6.95e-05	0.00227765
Klf6	716.98	0.25448	0.0640256	3.97466	7.05e-05	0.00230576
Dync1i1	3803.94	-0.185032	0.0465582	-3.9742	7.06e-05	0.00230576
Abhd17a	2094.22	-0.232892	0.0586221	-3.97276	7.1e-05	0.00231518
Calb2	3719.7	-0.26467	0.0666361	-3.97186	7.13e-05	0.00231934
Fkbp8	5853.83	-0.130924	0.0329685	-3.97118	7.15e-05	0.00232148
Ankrd55	580.097	-0.219782	0.0554297	-3.96505	7.34e-05	0.00237254
Nacc2	13017.3	-0.146331	0.0369049	-3.96509	7.34e-05	0.00237254
Ano4	1383.85	-0.176116	0.0444315	-3.96377	7.38e-05	0.00238074
Dst	21402	-0.13952	0.0352368	-3.95949	7.51e-05	0.00241906
Kndc1	9329.52	-0.138588	0.0350091	-3.95862	7.54e-05	0.00242318
Robo4	281.829	-0.273591	0.0691793	-3.95481	7.66e-05	0.00245731
Il13ra1	187.47	0.308923	0.0782914	3.9458	7.95e-05	0.0025466
Stmn3	9496.57	-0.174825	0.0443263	-3.94405	8.01e-05	0.00256033
Luzp2	2800.73	0.194456	0.0493281	3.9421	8.08e-05	0.00257628
Olig1	5696.53	-0.216605	0.0549582	-3.94127	8.11e-05	0.00258023
Myh14	3712.91	-0.194162	0.0493028	-3.93816	8.21e-05	0.00260882
Kcnc4	1824.18	-0.158799	0.0403384	-3.93666	8.26e-05	0.00262016
Tfrc	3397.69	-0.265201	0.0673973	-3.9349	8.32e-05	0.00263443
Ptbp1	844.885	0.248203	0.0630902	3.93409	8.35e-05	0.00263823
Fam219a	4172.63	-0.135225	0.0344091	-3.92993	8.5e-05	0.00267913
Suclg2	631.146	0.191954	0.0489003	3.92542	8.66e-05	0.00272464
Tomm40	1304.34	-0.160711	0.0409661	-3.92302	8.74e-05	0.00274674
Rcsd1	188.149	0.328737	0.0838842	3.91894	8.89e-05	0.00278833
Ppp1r18	288.787	0.26762	0.0683569	3.91505	9.04e-05	0.00282836
Uqcr11	1429.11	-0.178422	0.0455803	-3.91446	9.06e-05	0.00282991
Calm3	28524	-0.161586	0.0413036	-3.91216	9.15e-05	0.00285017
Gmip	294.248	0.304908	0.0779453	3.91182	9.16e-05	0.00285017
Sun2	2410.4	0.155074	0.0396866	3.90746	9.33e-05	0.00289667
Hhipl1	269.292	-0.272347	0.0697987	-3.9019	9.54e-05	0.00295296
Sult4a1	10021.4	-0.164261	0.0420941	-3.90223	9.53e-05	0.00295296
Lgi1	2090.11	-0.133698	0.034278	-3.9004	9.6e-05	0.00296569
Zmynd15	46.9066	0.358726	0.0920597	3.89666	9.75e-05	0.00300625
Nphs1	27.2208	-0.328027	0.0841943	-3.89607	9.78e-05	0.00300802
Faim2	20202.6	-0.139773	0.035907	-3.89265	9.92e-05	0.00304505
5730409E04Rik	2837.92	-0.149939	0.0385407	-3.8904	0.000100079	0.00306774
Herc3	3133.7	-0.161622	0.0416038	-3.8848	0.000102414	0.00313349
Ccr5	116.696	0.331917	0.0855285	3.88078	0.000104124	0.0031799
Ticam2	22.1695	0.316163	0.0814879	3.87988	0.000104508	0.00318575
Efemp2	413.121	0.268902	0.0693214	3.87907	0.000104858	0.00319055
Timm8b	1176.74	-0.190094	0.0490128	-3.87845	0.000105126	0.0031928
Trim17	181.608	-0.317346	0.0818783	-3.87582	0.000106266	0.00322151
Spire2	933.26	-0.19335	0.0499813	-3.86845	0.000109528	0.00330828
Layn	177.601	-0.338443	0.087486	-3.86854	0.00010949	0.00330828
Slc45a4	2250.01	-0.163591	0.0423467	-3.86314	0.000111941	0.00337497
Lpcat4	1991.78	-0.164819	0.042676	-3.8621	0.000112416	0.00338312
Omg	3081.84	-0.156785	0.0406091	-3.86083	0.000113002	0.00339426
D430041D05Rik	2084.74	-0.167592	0.043413	-3.86041	0.000113197	0.00339426
Vamp1	32648	-0.226102	0.0585847	-3.85941	0.00011366	0.00340198
Steap3	158.278	0.335015	0.0868248	3.85852	0.000114078	0.0034083
Klhl6	82.4184	0.352598	0.0914159	3.85708	0.000114752	0.00342226
Cend1	8598.86	-0.188545	0.0489361	-3.85288	0.000116737	0.00347519
Tspo	126.101	0.340126	0.088295	3.85216	0.000117081	0.00347916
Ecm1	176.568	0.349574	0.0907649	3.85142	0.000117435	0.00348342
Nfic	6826.56	-0.14407	0.0374419	-3.84784	0.000119163	0.00352202
Mypop	1230.04	-0.171308	0.044516	-3.84823	0.000118975	0.00352202
Rgma	1537.08	0.183964	0.0478815	3.84206	0.000122005	0.00359957
Thbs2	757.32	0.317424	0.082671	3.83961	0.00012323	0.00362925
Gcnt1	74.551	0.349098	0.0909354	3.83897	0.000123552	0.00363225
Lcp1	1035.53	-0.254001	0.0661808	-3.83798	0.000124052	0.00364047
Hr	1635.64	-0.265266	0.069186	-3.8341	0.000126025	0.00369021
Itpr3	583.068	-0.303138	0.0790704	-3.83377	0.000126193	0.00369021
Cltb	4400.42	-0.130792	0.0341199	-3.8333	0.000126438	0.00369082
Ccdc88b	171.973	0.307199	0.0801651	3.83208	0.000127066	0.00370261
Renbp	123.677	0.350328	0.0915873	3.82507	0.000130737	0.00380288
Slc22a4	724.672	0.18205	0.0476279	3.82234	0.000132193	0.00383849
Sspo	269.411	0.347852	0.0910459	3.82062	0.000133116	0.00385849
Lrrc75b	1861.21	-0.179826	0.0470834	-3.8193	0.000133831	0.00387241
Iqgap1	854.086	0.216091	0.05664	3.81516	0.000136094	0.00393101
Cdsn	27.8465	0.31422	0.0824165	3.81258	0.000137522	0.00396534
Peli3	1485.56	-0.194057	0.0509396	-3.80956	0.000139215	0.00400716
Syt3	2581.25	-0.180515	0.0473969	-3.80859	0.000139761	0.00401228
Asah1	1496.87	0.151596	0.0398059	3.80838	0.000139878	0.00401228
Capn1	1213.19	-0.204155	0.0536425	-3.80584	0.000141322	0.00404667
Mapk8ip2	7831.62	-0.167141	0.0439433	-3.80355	0.000142639	0.00407336
Stk32a	813.708	-0.32299	0.0849224	-3.80336	0.000142748	0.00407336
Fnip2	475.346	0.211598	0.0557027	3.7987	0.000145455	0.00414346
Gria4	4720.19	-0.181238	0.0477187	-3.79805	0.000145836	0.00414717
Dmtn	4516	-0.135425	0.0357301	-3.79023	0.000150505	0.00427212
Pgr	509.31	-0.241279	0.0636648	-3.78983	0.000150747	0.00427212
Lpar5	21.0596	0.312263	0.0824649	3.78662	0.000152713	0.00432043
Akap6	6703.41	-0.143589	0.0379859	-3.78006	0.000156791	0.00441312
P2rx6	460.206	-0.251163	0.0664417	-3.78021	0.000156698	0.00441312
Mpi	981.007	-0.169979	0.0449582	-3.78082	0.000156315	0.00441312
Mapk8ip1	10052.8	-0.13499	0.0357585	-3.77505	0.000159973	0.00449503
Slc35f3	787.959	-0.248605	0.0659287	-3.77082	0.00016271	0.00456416
Rtl8c	3103.77	-0.133928	0.0355408	-3.76829	0.000164367	0.00460284
Gmpr	1454.03	-0.228816	0.0607377	-3.76728	0.000165034	0.00461369
Rerg	463.447	-0.222036	0.0589568	-3.76608	0.000165829	0.0046281
Clcf1	63.0089	0.347531	0.0923423	3.76351	0.000167546	0.00466811
Syndig1	1194.55	-0.202735	0.0538996	-3.76134	0.000169006	0.00470087
Zc3hav1	296.786	0.254207	0.067656	3.75735	0.000171722	0.00476839
Gch1	82.4325	0.342686	0.0912204	3.75669	0.000172177	0.00477301
Igsf1	453.096	0.342408	0.0912333	3.7531	0.00017466	0.00483372
Emc10	4078.63	-0.12533	0.0334222	-3.7499	0.000176902	0.00488758
Cchcr1	236.603	0.283631	0.0756863	3.74746	0.000178634	0.0049272
Kif5a	57503.5	-0.122413	0.0326712	-3.74682	0.000179094	0.00493164
Tmem250-ps	2411.79	-0.168632	0.0450175	-3.74593	0.000179727	0.00494085
Rnft1	269.043	0.267816	0.07154	3.74358	0.000181414	0.00497068
Septin11	1017.29	0.179604	0.0479737	3.74379	0.000181262	0.00497068
Laptm4a	5030.38	0.153616	0.0410589	3.74136	0.000183025	0.00500653
Tnfrsf11b	93.3277	0.343701	0.0920577	3.73354	0.000188806	0.00515612
Wasf2	857.153	0.162808	0.0436232	3.73214	0.000189863	0.00517644
Slamf8	11.2563	0.268295	0.0720024	3.7262	0.000194388	0.00529107
Necap2	966.872	0.194372	0.0522011	3.72351	0.000196471	0.00533898
Klhl24	1403.63	0.146553	0.0393783	3.72168	0.000197905	0.00536911
Tgfb1	141.485	0.307202	0.0825824	3.71995	0.000199266	0.00539289
Pald1	611.421	0.247907	0.0666465	3.71973	0.000199434	0.00539289
BC034090	631.425	-0.197297	0.0530993	-3.71563	0.0002027	0.00547223
Pan3	651.034	0.201856	0.0543641	3.71305	0.000204777	0.00551931
Serinc2	45.0865	0.341586	0.092031	3.71164	0.00020592	0.00554105
Camkk1	3881.59	-0.158482	0.0427042	-3.71114	0.000206325	0.00554293
Copg1	9817.75	-0.128322	0.0345998	-3.70875	0.000208285	0.00556843
Inppl1	1169.23	0.194663	0.052484	3.709	0.000208081	0.00556843
Rnf122	245.595	0.286827	0.0773249	3.70937	0.000207774	0.00556843
Kcnh1	746.341	-0.193425	0.0521695	-3.70762	0.000209216	0.00558428
Sp110	45.6616	0.342266	0.092331	3.70694	0.000209775	0.00559016
Clstn2	1595.31	-0.194351	0.052535	-3.69947	0.000216052	0.00574816
Naprt	210.027	0.272463	0.0737175	3.69604	0.000218987	0.00581658
Guk1	1542.78	-0.172336	0.0466322	-3.69565	0.000219327	0.00581658
A830018L16Rik	867.49	-0.183626	0.0496944	-3.6951	0.000219803	0.00581984
Cacna2d3	2114.45	-0.213123	0.0577032	-3.69344	0.00022124	0.00583921
Sting1	110.577	0.316893	0.0857988	3.69344	0.000221241	0.00583921
Mmp19	192.965	0.313756	0.0850485	3.68914	0.00022501	0.00592425
Vcl	1502.57	0.161303	0.043726	3.68895	0.00022518	0.00592425
Atl1	1869.22	-0.159999	0.0434442	-3.68286	0.00023063	0.0060515
Spock1	7263.25	-0.104234	0.0283035	-3.68273	0.00023075	0.0060515
Dusp27	11.5927	0.255459	0.0694609	3.67774	0.000235312	0.00616138
Gabra4	398.337	0.243676	0.0662661	3.67724	0.000235776	0.00616374
Ache	5192.54	-0.137522	0.0374095	-3.67613	0.000236802	0.00618079
Myom1	78.7091	0.330725	0.0900395	3.67311	0.000239619	0.00623562
Fosl2	226.67	0.280537	0.0763769	3.67307	0.000239657	0.00623562
Apobr	45.7938	0.338542	0.0921824	3.67253	0.000240161	0.00623889
Sipa1l3	1896.97	-0.168484	0.0459648	-3.66551	0.000246849	0.00640257
Slc9a1	1839.35	-0.151214	0.0412846	-3.66273	0.000249545	0.00646236
Idh2	710.678	0.21063	0.0575131	3.6623	0.000249961	0.006463
Phospho1	1374.02	-0.23177	0.0633121	-3.66075	0.000251477	0.00649203
Hecw1	2228.67	-0.164949	0.045072	-3.65967	0.000252537	0.00650923
Syt2	20458.7	-0.17832	0.0487665	-3.65661	0.000255569	0.00657712
Sh3bp5l	1731.62	-0.15942	0.0436139	-3.65526	0.00025692	0.00660159
Zc3h12c	460.531	0.22371	0.0612571	3.652	0.000260211	0.00667578
Sugct	90.064	0.322868	0.0884624	3.64978	0.000262469	0.00672328
Cebpa	205.324	0.317235	0.0869665	3.64779	0.000264507	0.006765
Prph	1423.93	-0.335149	0.0919337	-3.64555	0.000266819	0.00681357
Slc35d3	236.378	-0.279022	0.0765902	-3.64305	0.000269423	0.00686946
Vdr	115.652	-0.331435	0.0910027	-3.64204	0.00027049	0.00688604
Trpm2	2118.16	-0.146384	0.0402681	-3.63523	0.000277737	0.00705964
Zfp281	837.17	0.199157	0.0548022	3.6341	0.000278957	0.00706891
Itprid2	2495.99	0.176036	0.0484362	3.6344	0.000278634	0.00706891
Kcnn3	412.289	0.258128	0.0710454	3.63328	0.000279842	0.00708049
Arhgef5	103.986	0.334599	0.0921876	3.62955	0.000283917	0.0071726
Fam129a	169.479	0.334511	0.092196	3.62826	0.000285341	0.00719758
Tecr	10836.1	-0.124711	0.0344221	-3.623	0.000291203	0.00733424
Adam19	1272.34	-0.235432	0.065071	-3.61809	0.000296789	0.00746355
Lonrf3	600.949	0.219019	0.0605618	3.61646	0.000298656	0.00749907
Lpxn	35.7398	0.327836	0.0907419	3.61284	0.000302865	0.00759323
Lcat	836.291	0.234836	0.0650228	3.6116	0.000304317	0.00761808
Tiam2	219.504	0.272283	0.075441	3.60922	0.000307123	0.00767154
Xirp1	10.0372	0.227003	0.0628993	3.609	0.000307382	0.00767154
Slc32a1	4261.79	-0.189837	0.052623	-3.6075	0.000309161	0.00769393
Themis2	39.0815	0.331827	0.0919835	3.60746	0.00030921	0.00769393
Mast1	4623.77	-0.151885	0.0421138	-3.60653	0.000310318	0.00770988
Nphs1os	8.19826	-0.240195	0.0666359	-3.60459	0.000312651	0.00775619
Usp5	5644.14	-0.131318	0.0364351	-3.60417	0.00031315	0.00775691
Scg3	7050.89	0.153265	0.0425436	3.60253	0.000315136	0.00778277
Ndufb7	1479.72	-0.178044	0.0494207	-3.60262	0.000315028	0.00778277
Cntn4	919.313	-0.171266	0.0475827	-3.59934	0.000319024	0.00786703
Lix1	341.227	0.313186	0.0870291	3.59864	0.000319886	0.00787654
Elmsan1	714.495	0.186952	0.0519765	3.59687	0.000322074	0.0079186
Pkd2l1	447.239	-0.320404	0.0891022	-3.59592	0.000323248	0.00793567
Cacng2	1567.64	-0.228454	0.0635636	-3.59411	0.000325505	0.00797923
Mob1a	334.931	0.224105	0.0623645	3.59347	0.000326304	0.00798695
Selenom	1865.36	-0.170526	0.0474624	-3.59287	0.000327051	0.00799341
Hdlbp	7063.99	-0.128326	0.0357381	-3.59073	0.000329759	0.00804421
Ndufs7	1996.3	-0.140538	0.0391421	-3.59045	0.000330104	0.00804421
Galnt6	1592.53	0.196227	0.0546603	3.58993	0.000330761	0.00804835
Tmem125	859.912	-0.214086	0.0596518	-3.58892	0.000332047	0.00806776
Havcr2	106.685	0.324773	0.0906201	3.5839	0.000338507	0.00821266
Ncf2	142.043	0.312115	0.0871151	3.58279	0.000339945	0.00823544
Trim14	36.8812	0.328827	0.091806	3.58176	0.000341286	0.00824374
Dhrs3	258.415	0.268993	0.0750932	3.58212	0.000340823	0.00824374
Cox6a1	3712.31	-0.173522	0.0484579	-3.58088	0.000342441	0.00825959
Ptpn5	2956.29	-0.146381	0.040894	-3.57952	0.00034423	0.00829063
Ccdc162	121.475	0.315604	0.0882096	3.57788	0.000346386	0.0083304
Prkcz	3612.99	-0.129291	0.0361477	-3.57675	0.00034789	0.00835442
Gfpt2	120.819	0.310275	0.0868437	3.5728	0.000353186	0.0084693
Car7	295.663	-0.250385	0.0702002	-3.56673	0.000361465	0.00865526
Stx18	1402.91	-0.159602	0.0447604	-3.56568	0.000362909	0.00867071
Podxl2	5537.46	-0.141257	0.0396177	-3.5655	0.00036316	0.00867071
H2bc6	148.108	-0.324053	0.0909419	-3.5633	0.000366221	0.00873118
Lars2	1706.02	0.27805	0.0781121	3.55963	0.000371381	0.00884142
Scn4b	14182.1	-0.197473	0.0554837	-3.55912	0.000372103	0.00884588
Sec61a1	1341.11	0.147159	0.0413597	3.55804	0.000373633	0.00886949
Agtrap	540.822	0.193511	0.0544003	3.55716	0.000374889	0.00888655
Chst12	604.214	-0.193136	0.0543372	-3.5544	0.000378844	0.00896742
Mcam	2026.29	-0.198693	0.0559361	-3.55214	0.000382113	0.00903187
Morc3	635.961	0.179851	0.0506408	3.5515	0.000383041	0.00904086
Rims1	2462.4	-0.123524	0.0347927	-3.55029	0.000384808	0.0090696
Fkbp9	1013.21	0.210297	0.0593447	3.54365	0.000394625	0.00928774
Tubb3	12706	-0.203932	0.0575964	-3.54072	0.000399044	0.00937839
Ptpn7	7.69956	0.225822	0.0638108	3.53893	0.000401746	0.0094151
Tmc3	106.587	0.317642	0.0897474	3.53928	0.000401214	0.0094151
Rps8	3940.19	0.124667	0.0352771	3.53393	0.000409424	0.00958145
Lgi4	1693.06	0.186534	0.0528115	3.53208	0.000412309	0.00963531
Kank2	454.872	0.280801	0.0795782	3.52862	0.000417732	0.00974825
Ano6	960.704	0.164136	0.0465475	3.52621	0.00042156	0.00979608
Parvb	751.431	0.214845	0.0609191	3.52673	0.000420725	0.00979608
Adap2	159.634	0.289902	0.082206	3.52653	0.000421036	0.00979608
Cttnbp2nl	1132.9	0.197148	0.055956	3.52328	0.000426249	0.00987101
Plscr2	107.248	0.313348	0.0889418	3.52307	0.000426577	0.00987101
Mtap	743.661	-0.222398	0.063123	-3.52325	0.000426284	0.00987101
Mmgt2	348.817	0.21193	0.0601807	3.52157	0.000429005	0.00991331
Gja1	7423.55	0.170759	0.0485338	3.51836	0.000434221	0.0100067
Apba2	3641.28	-0.108701	0.0308956	-3.51834	0.000434256	0.0100067
Plcb1	2457.49	-0.1754	0.0498708	-3.5171	0.000436294	0.0100396
Tmprss5	720.669	-0.284235	0.0808638	-3.51498	0.000439779	0.0101057
Mdp1	801.948	-0.161559	0.0459831	-3.51344	0.000442349	0.0101507
Tle5	10816.3	-0.118961	0.0338792	-3.51134	0.00044586	0.0102171
Maneal	1392.83	-0.144469	0.0411746	-3.5087	0.00045031	0.0103047
Zfyve28	1115.82	-0.210987	0.0601479	-3.50781	0.000451808	0.0103247
Olfr287	337.382	-0.257281	0.0733832	-3.50599	0.000454918	0.0103814
Mtmr11	443.19	0.237833	0.0678522	3.50516	0.000456335	0.0103994
H1f2	301.264	-0.270104	0.0770983	-3.50337	0.000459416	0.0104552
Chga	8709.11	-0.169333	0.0483917	-3.49921	0.000466637	0.0106049
Pacrg	345.016	-0.216679	0.061951	-3.49759	0.000469475	0.0106548
Ism1	78.6554	-0.319767	0.0914358	-3.49718	0.000470208	0.0106568
Cabp1	1844.72	-0.190929	0.0546729	-3.4922	0.000479056	0.0108424
Tln2	5332.25	-0.125611	0.0360202	-3.48725	0.000488021	0.0110227
Vstm5	413.259	-0.214576	0.0615349	-3.48706	0.000488357	0.0110227
Trim47	109.722	0.307251	0.0881715	3.48469	0.000492703	0.0111056
Vsx2	171.96	-0.284497	0.0816809	-3.48303	0.000495778	0.0111597
Shisa5	897.5	0.182256	0.0523353	3.48246	0.000496825	0.0111681
Lasp1	2137.72	0.146449	0.0420612	3.48182	0.000498021	0.0111756
Kcnk6	95.8993	0.313767	0.0901227	3.48155	0.000498513	0.0111756
Fgd2	143.857	0.294053	0.0844704	3.48114	0.000499292	0.0111779
Pdk3	680.696	-0.190773	0.0548276	-3.47951	0.000502323	0.0112306
Lrrk1	182.022	0.307369	0.0886362	3.46776	0.000524812	0.0117175
Pgp	1831.89	-0.193091	0.05575	-3.46351	0.000533175	0.0118881
Arhgap4	156.275	0.299747	0.0865689	3.46253	0.000535123	0.0119155
Unc5b	3090.44	-0.19175	0.055448	-3.45818	0.00054383	0.0120705
Sh3glb2	3907.18	-0.136051	0.0393419	-3.45817	0.000543863	0.0120705
Grm2	126.491	0.312185	0.0902802	3.45796	0.000544278	0.0120705
Mcl1	1838.7	0.168377	0.0487229	3.45581	0.000548641	0.0121347
St8sia2	175.705	0.301074	0.0871203	3.45585	0.000548566	0.0121347
Stab1	494.99	0.290606	0.0841188	3.45471	0.000550889	0.0121682
Atp13a5	382.101	0.257184	0.0744549	3.45423	0.000551873	0.0121736
Slf2	1268.39	0.143255	0.0414797	3.45363	0.000553095	0.0121843
Creg2	2018.64	-0.134917	0.0390911	-3.45136	0.000557766	0.0122708
Hoxd8	885.839	-0.298763	0.0865786	-3.45077	0.000558988	0.0122785
Hddc2	261.263	-0.2444	0.0708308	-3.45048	0.0005596	0.0122785
Irf5	305.449	0.235384	0.0682519	3.44875	0.000563198	0.0123411
Rtn2	2108.57	-0.146349	0.0424563	-3.44704	0.000566755	0.0124026
Acan	916.021	-0.213681	0.0620228	-3.4452	0.000570628	0.0124708
Flna	2979.3	0.253757	0.0736692	3.44455	0.00057202	0.0124847
Slc1a3	3958.71	0.248825	0.0722672	3.44312	0.00057504	0.0125341
Tbc1d9b	7714.34	-0.123938	0.036018	-3.44101	0.000579539	0.0126155
Nxpe3	1461.47	-0.170703	0.0496514	-3.43803	0.00058596	0.0127385
Rgs7bp	3241.14	-0.184403	0.0537055	-3.43359	0.00059564	0.0129319
Frmd4a	1638.03	0.142303	0.0414886	3.42993	0.000603732	0.0130904
Smco3	289.708	-0.262152	0.0765157	-3.42612	0.000612272	0.0132426
Prima1	413.862	-0.230243	0.0672031	-3.42608	0.000612354	0.0132426
Fam135b	558.48	-0.278249	0.0812845	-3.42314	0.000619013	0.0133691
Mmp17	817.963	-0.179773	0.052624	-3.41618	0.000635063	0.0136978
Mcu	661.11	-0.191465	0.0560543	-3.41571	0.000636166	0.0137037
Csnk1g2	2756.35	-0.112232	0.0328642	-3.41502	0.000637774	0.0137126
Vamp8	200.989	0.268753	0.0787046	3.41471	0.000638511	0.0137126
Pclaf	14.0742	0.249779	0.0731531	3.41447	0.00063907	0.0137126
Ehd2	297.406	0.303989	0.0890975	3.41186	0.000645201	0.0138262
Slc12a4	846.644	0.193864	0.0568492	3.41014	0.000649287	0.0138598
Zdhhc3	2716.96	-0.135074	0.0396076	-3.4103	0.000648921	0.0138598
Tlr4	53.7528	0.314775	0.092302	3.41027	0.000648983	0.0138598
Tns1	3999.38	-0.204696	0.0600472	-3.40892	0.000652202	0.0139041
Cdk5r2	1888.25	-0.185211	0.0543452	-3.40805	0.000654289	0.0139271
Hsd11b1	629.057	-0.279228	0.0819386	-3.40777	0.000654966	0.0139271
Tspan4	387.253	0.212856	0.0624805	3.40675	0.000657408	0.0139611
Apln	1698.19	-0.238027	0.0698812	-3.40616	0.000658824	0.0139732
Samd8	1493.01	0.146968	0.0431742	3.40406	0.000663914	0.0140631
Mlc1	5326.51	0.15114	0.0444405	3.40095	0.000671511	0.0142058
Ak1	2469.21	-0.152735	0.0449214	-3.40004	0.000673748	0.0142348
Il21r	57.9745	0.30889	0.0908674	3.39935	0.000675468	0.0142348
Rab32	58.2193	0.312514	0.091926	3.39963	0.000674773	0.0142348
Stk39	2990.33	-0.155869	0.0458754	-3.39766	0.000679643	0.0143045
Slc7a10	3001.24	-0.211392	0.062231	-3.39689	0.000681575	0.014327
Tnk2	10081.4	-0.129869	0.0382497	-3.3953	0.000685535	0.0143919
Milr1	33.8449	0.306393	0.0902671	3.3943	0.000688047	0.0144263
Nckipsd	2407.43	-0.156424	0.0461159	-3.39198	0.000693899	0.0145305
Zfp185	35.5138	0.296345	0.0873868	3.39119	0.000695893	0.0145539
Ncoa7	2217.11	-0.133447	0.0393668	-3.38984	0.000699334	0.0145889
Acrbp	204.304	0.284443	0.0839096	3.38987	0.00069925	0.0145889
Rbfox3	3498.38	-0.148242	0.0437419	-3.38903	0.000701414	0.0145964
Sh2d4a	11.5157	0.237187	0.0699873	3.38901	0.000701463	0.0145964
Endou	45.331	0.309403	0.0913197	3.38813	0.000703707	0.0146247
Mindy2	2031.16	0.123936	0.0365833	3.38778	0.000704615	0.0146252
Lrrc3	195.329	0.284046	0.0838641	3.38697	0.000706681	0.0146497
Clasp1	4220.24	-0.141178	0.0417572	-3.38092	0.000722426	0.0149573
Insig1	2895.81	-0.183136	0.0543368	-3.37039	0.000750617	0.0155215
Stk40	967.455	0.165126	0.0490011	3.36984	0.000752111	0.015533
Ptafr	44.7863	0.310971	0.0923029	3.36903	0.000754344	0.0155596
Lrrc75a	199.763	0.261285	0.0775784	3.36801	0.000757122	0.0155975
Cd300lb	8.17103	0.185831	0.0552299	3.36469	0.000766304	0.015767
Ndufb8	3958.52	-0.150051	0.0446889	-3.35768	0.000786009	0.0161523
Nkiras1	3194.11	-0.162797	0.0485453	-3.3535	0.000797963	0.0163776
Myof	165.825	0.307658	0.0918201	3.35066	0.000806198	0.0165261
Lats2	955.575	0.158111	0.0472388	3.34705	0.000816764	0.0167219
Slc13a3	761.853	0.280276	0.0838114	3.34413	0.00082541	0.016878
Hipk1	3049.71	0.125962	0.0376922	3.34185	0.000832227	0.0169964
Aard	223.511	-0.241817	0.0724536	-3.33755	0.000845218	0.0172404
Slc25a29	307.954	-0.224557	0.0672932	-3.33699	0.000846908	0.0172535
Cd151	1041.67	0.178899	0.0536261	3.33604	0.000849817	0.0172915
Rcor2	189.065	-0.256446	0.0769305	-3.33347	0.000857687	0.0174301
Mafb	344.857	0.247412	0.0742531	3.33201	0.000862217	0.0175007
Hmgn2	1016.83	0.188929	0.0567454	3.32941	0.000870298	0.017643
Prkaca	6294.06	-0.128177	0.0385085	-3.32855	0.000873002	0.0176762
Celf1	2026.09	0.159816	0.0480381	3.32686	0.000878312	0.0177619
Rasl11a	35.3919	0.302203	0.090856	3.32617	0.00088048	0.017784
Fam189b	1353.31	-0.175633	0.0528109	-3.3257	0.000881961	0.0177921
Ddit3	459.698	0.20223	0.0608147	3.32534	0.000883099	0.0177934
Stard4	1252.57	-0.170103	0.0512031	-3.32212	0.000893373	0.0179736
Uchl1	11872	-0.13311	0.0400749	-3.32154	0.000895228	0.0179736
Map6	3912.81	-0.129073	0.0388597	-3.32151	0.000895308	0.0179736
Sigmar1	949.841	-0.169415	0.0510417	-3.31915	0.00090291	0.0181042
Nfam1	78.6434	0.300732	0.0906405	3.31786	0.000907106	0.0181663
Tmem198b	388.724	0.25079	0.0756247	3.31625	0.000912347	0.0182491
Tgfbr2	694.202	0.233197	0.0703993	3.31249	0.00092471	0.0184518
Glis3	107.475	0.299846	0.0905138	3.31271	0.000923969	0.0184518
Pygm	3807.08	-0.212562	0.064183	-3.31181	0.000926953	0.0184742
B3galt5	5417.78	-0.185289	0.0559638	-3.31087	0.000930072	0.0184991
Cst3	16707.6	0.118756	0.0358698	3.31076	0.000930441	0.0184991
Adra1a	301.45	-0.249728	0.0754446	-3.31008	0.000932701	0.0185217
Septin9	1231.09	-0.17536	0.0530255	-3.3071	0.000942687	0.018646
Snn	5941.77	-0.118326	0.0357717	-3.30781	0.000940272	0.018646
Plpp3	3807.37	0.144739	0.0437648	3.30721	0.000942317	0.018646
Dkk3	2973.47	-0.173738	0.052544	-3.30653	0.000944603	0.018646
Etv1	1419.72	-0.20402	0.0616992	-3.30669	0.000944041	0.018646
Asah2	2194.28	-0.181444	0.0548937	-3.30536	0.000948531	0.0187012
Kcnip1	1105.91	-0.192288	0.0582213	-3.30271	0.000957545	0.0188556
Sft2d2	1079.23	0.158856	0.0481034	3.30239	0.000958642	0.0188556
Sptbn2	6631.58	-0.106289	0.0322258	-3.29827	0.000972837	0.019087
Slc7a14	4557.24	-0.169085	0.0512594	-3.29861	0.000971636	0.019087
Adamtsl3	118.805	0.303891	0.0921448	3.29797	0.000973876	0.019087
Nos1ap	1367.27	-0.193752	0.0588028	-3.29495	0.00098439	0.0192478
Cxcl10	25.096	0.277991	0.084369	3.29495	0.000984408	0.0192478
Cfap99	77.4457	-0.298215	0.0905424	-3.29365	0.000988972	0.0193142
Atp9a	9486.89	-0.096384	0.029302	-3.28933	0.00100428	0.01959
Tmem100	375.12	0.248787	0.0756647	3.28802	0.00100895	0.0196579
Vegfa	2320.5	-0.186469	0.0567195	-3.28756	0.00101059	0.019663
Reep2	2470.99	-0.130679	0.0397528	-3.28728	0.00101159	0.019663
Cmtm7	49.9602	0.301799	0.0918391	3.28617	0.0010156	0.0197177
Cabp7	5817.03	-0.214587	0.0653234	-3.285	0.00101984	0.0197589
Lrp3	2589.63	-0.121572	0.0370091	-3.28492	0.00102011	0.0197589
Rb1	988.315	0.162385	0.0494409	3.28443	0.00102189	0.0197701
Gas6	4315.56	-0.148062	0.0450928	-3.28349	0.00102529	0.0198126
Prrt3	997.929	-0.191169	0.0582455	-3.28212	0.00103028	0.0198859
Cdk6	91.6509	0.301923	0.092122	3.27743	0.00104758	0.0201962
Ndufa13	2594.24	-0.120463	0.0367624	-3.27679	0.00104994	0.020218
Rhoj	204.933	0.284907	0.0869637	3.27616	0.00105229	0.0202398
Galnt4	223.956	0.239814	0.0732105	3.27567	0.00105411	0.0202513
Igf2r	1334.22	0.142203	0.0434574	3.27223	0.00106703	0.0204756
A2ml1	113.674	-0.28116	0.0860581	-3.26709	0.00108659	0.0208267
Mcf2l	3519.06	-0.119091	0.0364787	-3.26468	0.00109588	0.0209804
Sik1	315.368	0.231518	0.0709281	3.26412	0.00109804	0.0209976
Tmed3	627.319	0.179813	0.0551317	3.26151	0.0011082	0.0211672
Arhgef26	1244.48	0.179458	0.0550473	3.26007	0.00111386	0.0212508
Ntrk1	37.273	0.237693	0.0729815	3.2569	0.00112637	0.0214444
Prkcd	621.957	0.244501	0.0750731	3.25684	0.0011266	0.0214444
Klhdc8b	390.371	0.240568	0.0738805	3.25617	0.00112925	0.02147
Stom	302.738	0.258402	0.0793859	3.255	0.00113391	0.0215338
Asb16	319.011	-0.247459	0.0761033	-3.25162	0.00114749	0.0217668
Slc25a23	5212.19	0.103169	0.0317331	3.25116	0.00114935	0.0217771
Dnm3	8555.65	-0.120234	0.0369868	-3.25073	0.00115109	0.021785
Ptch1	3268.51	-0.160844	0.0494914	-3.24993	0.00115433	0.0218213
Rps6ka3	977.156	0.164139	0.050526	3.2486	0.00115975	0.0218988
Prrx2	24.765	0.26268	0.0808778	3.24786	0.00116275	0.0219304
H1f0	2496.81	-0.134901	0.0415533	-3.24644	0.00116857	0.0220149
Wsb1	2688.31	0.167403	0.0515791	3.24556	0.0011722	0.0220582
Fgf9	852.075	-0.2005	0.0617908	-3.24481	0.00117528	0.0220798
Gpd1	4566.79	-0.206334	0.0635988	-3.24431	0.00117736	0.0220798
Il6ra	122.653	0.280887	0.0865717	3.24456	0.00117634	0.0220798
Gphn	1864.46	-0.122079	0.0376362	-3.24365	0.0011801	0.0221061
Rims4	267.955	0.296407	0.0914506	3.24117	0.00119039	0.0222736
Tcn2	746.935	0.17776	0.0548571	3.24042	0.00119355	0.0223054
Bst2	98.0974	0.298728	0.0921964	3.24012	0.00119479	0.0223054
Myl12b	4557.01	-0.106963	0.0330226	-3.2391	0.00119908	0.0223603
Dock9	7074.32	-0.150082	0.04634	-3.23871	0.00120073	0.0223658
4933431E20Rik	3822.6	-0.144154	0.0445648	-3.23471	0.00121767	0.0226558
Slc25a1	1712.65	-0.153238	0.0473936	-3.2333	0.00122371	0.0227425
Mapre3	3801.96	-0.113576	0.035139	-3.23219	0.00122846	0.0228052
Mchr1	192.627	-0.245737	0.0760544	-3.23107	0.00123329	0.0228691
Eps8l3	1397.15	-0.164855	0.0510804	-3.22736	0.00124939	0.0231417
Syt1	5255.37	0.236046	0.0731542	3.22669	0.0012523	0.0231587
Fxr2	3783.06	-0.120319	0.0372909	-3.22649	0.00125317	0.0231587
Ncf4	29.5518	0.281226	0.0871774	3.2259	0.00125577	0.0231587
Prss30	15.8978	0.220155	0.0682466	3.22587	0.00125591	0.0231587
Edem1	740.542	0.164597	0.0510393	3.22491	0.00126012	0.0232103
Nexn	363.039	-0.220797	0.0684847	-3.22403	0.00126399	0.0232558
Ina	8131.53	-0.135094	0.0419145	-3.22309	0.00126817	0.0233067
Caln1	1520.2	-0.252931	0.0784865	-3.22261	0.0012703	0.0233198
Sppl2b	1305.41	-0.222414	0.069102	-3.21863	0.00128805	0.0236195
Camta2	4716.17	-0.115858	0.03601	-3.21738	0.00129369	0.0236966
Metrn	2094.08	-0.173742	0.0540682	-3.21338	0.00131181	0.0239496
Birc7	11.7343	-0.230613	0.07177	-3.21323	0.00131252	0.0239496
0610030E20Rik	592.179	0.185726	0.0578034	3.21306	0.0013133	0.0239496
Ccnd2	742.117	0.244213	0.0760047	3.21313	0.00131297	0.0239496
Ttc39a	391.503	-0.232153	0.0723058	-3.21071	0.00132408	0.0241195
Cdk19	1899.14	0.12104	0.0377129	3.20951	0.0013296	0.0241934
A730020M07Rik	93.394	-0.295169	0.0919838	-3.20892	0.00133232	0.0242163
Atp13a2	5369.41	-0.109686	0.034188	-3.2083	0.0013352	0.0242419
Hs3st3b1	155.478	0.250472	0.0781083	3.20672	0.00134257	0.024349
Sez6l2	16208.1	-0.123939	0.0387018	-3.2024	0.00136286	0.0246899
Lgi3	8438.22	-0.142127	0.0443891	-3.20185	0.00136548	0.0247103
Megf10	2015.96	-0.158565	0.0495734	-3.19858	0.00138105	0.0249646
Mcm3	114.8	0.269995	0.0845239	3.1943	0.00140168	0.02531
Kctd11	102.169	0.2765	0.0865747	3.19378	0.00140425	0.0253286
Dpysl3	3112.18	-0.136425	0.0427271	-3.19295	0.00140828	0.0253737
Nfe2l2	781.604	0.193561	0.0606384	3.19206	0.00141264	0.0254245
Knl1	12.7013	0.236799	0.074192	3.19171	0.00141434	0.0254273
Gna15	51.377	0.293933	0.0922195	3.18732	0.00143599	0.0257885
Eme2	579.907	-0.160911	0.0505023	-3.18621	0.00144152	0.0258597
Tm4sf1	300.599	0.251722	0.079051	3.1843	0.00145104	0.0259866
Lgr5	645.074	-0.217412	0.0682791	-3.18416	0.00145174	0.0259866
Col5a3	590.174	0.271577	0.0853015	3.18373	0.00145391	0.0259973
Thoc3	699.064	-0.152833	0.0480256	-3.18232	0.00146099	0.0260957
Cpt1a	1761.29	-0.151022	0.0474641	-3.18182	0.0014635	0.0261123
Trhr	286.896	-0.270421	0.0850009	-3.18138	0.00146574	0.026124
Nkx2-9	147.355	-0.291374	0.0916349	-3.17973	0.00147412	0.0262451
Trpv1	14.8992	0.149644	0.0471087	3.17656	0.00149031	0.0265047
Rap1b	1003.83	0.168646	0.0531248	3.17453	0.00150079	0.0266624
Scamp1	5749.37	-0.114314	0.0360154	-3.17404	0.00150331	0.0266784
Srl	190.944	0.256339	0.0808136	3.17198	0.00151405	0.0268403
St6galnac5	152.326	0.262352	0.082719	3.17161	0.00151598	0.0268457
Fnbp1	9167.89	-0.109578	0.0345667	-3.17006	0.00152409	0.0269604
Micu1	2181.83	-0.131604	0.0415774	-3.16527	0.00154938	0.0273784
Abi3	1347.05	-0.194816	0.0615825	-3.16349	0.0015589	0.0274731
Npdc1	3229.43	-0.135329	0.0427806	-3.16334	0.00155973	0.0274731
Erlin1	330.984	0.214528	0.0678154	3.16341	0.00155933	0.0274731
Sptan1	25737.7	-0.122551	0.0387573	-3.162	0.0015669	0.0275153
Slc44a3	22.0117	0.259094	0.0819411	3.16196	0.00156711	0.0275153
Mapk6	2919.58	-0.112303	0.0355124	-3.16237	0.00156493	0.0275153
Lrrc4b	3336.79	-0.163739	0.0518115	-3.16028	0.00157617	0.0276156
Etnppl	1112.73	-0.28663	0.0906944	-3.1604	0.00157554	0.0276156
Gpx4	3978.45	-0.108627	0.0343797	-3.15962	0.00157973	0.0276486
Mustn1	32.1707	0.258838	0.08193	3.15925	0.00158175	0.0276546
Gcnt2	306.926	0.280254	0.0887457	3.15794	0.00158888	0.02775
Spred2	1053.44	-0.155046	0.0491083	-3.15722	0.00159281	0.0277892
Cacnb3	911.06	0.236553	0.0749638	3.15556	0.00160188	0.0279181
Creld1	1761.78	-0.133429	0.0423137	-3.15333	0.00161417	0.0281026
Wbp2	8601.14	-0.109703	0.0348135	-3.15116	0.00162621	0.0281058
Ctnnbip1	1143.89	-0.150193	0.0476634	-3.15111	0.0016265	0.0281058
Rph3a	22025.7	-0.142435	0.0451938	-3.15165	0.00162353	0.0281058
Fxyd5	196.254	0.264513	0.083898	3.1528	0.00161715	0.0281058
Tmsb4x	9630.74	0.189977	0.060294	3.15085	0.00162797	0.0281058
Alox8	281.146	-0.250382	0.0794619	-3.15097	0.00162731	0.0281058
Galnt15	331.358	0.280911	0.0891374	3.15143	0.0016247	0.0281058
Atp8a2	1615.91	-0.233038	0.0739207	-3.15255	0.00161854	0.0281058
1700003D09Rik	297.712	-0.241557	0.0766838	-3.15004	0.00163248	0.0281249
Lhx3	50.5749	-0.29085	0.092329	-3.15014	0.0016319	0.0281249
Gne	1149.85	-0.153789	0.0488473	-3.14837	0.00164185	0.0281982
Rgs10	693.498	0.173992	0.055261	3.14855	0.00164084	0.0281982
Iscu	2034.81	-0.175973	0.0558883	-3.14865	0.00164026	0.0281982
Atp7b	177.859	0.244774	0.0777546	3.14803	0.00164373	0.0282012
Msn	2645.82	0.225318	0.0715883	3.14742	0.0016472	0.0282314
Gpx8	94.6751	0.290533	0.0923274	3.14677	0.00165083	0.0282642
Abcb9	1467.39	-0.171448	0.0545039	-3.14562	0.00165737	0.0283469
Myh10	10072	-0.107947	0.0343283	-3.14456	0.00166338	0.028409
Ap3b2	4282.03	-0.0927801	0.0295067	-3.14437	0.00166444	0.028409
Ccdc50	1506.78	0.132492	0.0421779	3.14128	0.00168211	0.028681
Nacad	2980.93	-0.149446	0.0475898	-3.14029	0.00168779	0.0287184
Pgs1	2162.52	-0.153362	0.0488326	-3.14057	0.00168618	0.0287184
Ccl2	5.8712	0.15574	0.0496256	3.1383	0.00169929	0.0288845
Fzd1	519.314	0.210506	0.0671192	3.1363	0.00171097	0.029053
Pkd2	1158.53	0.171159	0.0546024	3.13464	0.00172064	0.0291873
Fgr	26.7937	0.274497	0.0876155	3.13298	0.00173043	0.0293232
Agtpbp1	4018.88	-0.130355	0.0416235	-3.13175	0.00173765	0.0294154
Cpne1	1034.53	0.143353	0.045796	3.13025	0.0017466	0.0295173
Ms4a6d	22.788	0.266492	0.0851376	3.13014	0.00174724	0.0295173
Btbd17	478.571	-0.248501	0.0794411	-3.12811	0.00175935	0.0296914
Zfp90	380.743	0.19668	0.0628913	3.12731	0.00176417	0.0297424
Glra1	2804.41	-0.221183	0.0707487	-3.12632	0.00177008	0.0298117
Cbx6	6247.4	-0.0969144	0.0310392	-3.12232	0.00179432	0.0301891
Tspan6	407.285	0.194887	0.0624328	3.12155	0.00179901	0.0302374
Rnf111	778.476	0.164295	0.0526377	3.12124	0.00180092	0.0302386
Vit	213.315	-0.245495	0.0787163	-3.11873	0.00181631	0.0304661
Copg2	2564.02	-0.118936	0.0381409	-3.11832	0.00181885	0.0304777
Pygb	10819.1	-0.107699	0.0345467	-3.11748	0.00182404	0.0305338
Syngr2	476.955	0.192508	0.0617655	3.11675	0.00182855	0.0305783
Ppa2	879.823	-0.153685	0.0493353	-3.11511	0.00183879	0.0307183
Mcm5	107.449	0.282967	0.0908602	3.11431	0.00184374	0.03077
Chdh	335.958	0.22371	0.0718519	3.11349	0.00184887	0.0308244
Ppp4r1l-ps	487.691	-0.189706	0.0609549	-3.11224	0.00185675	0.0309247
Kcnh2	3551.98	-0.125654	0.040398	-3.11041	0.00186827	0.0310851
Scn1b	6803.02	-0.136296	0.0438271	-3.10986	0.00187178	0.0311123
Hvcn1	411.381	0.193607	0.0622792	3.10869	0.00187916	0.0312035
Naglu	268.07	0.225797	0.072681	3.10669	0.00189198	0.0313734
Naga	614.82	0.175482	0.0564888	3.1065	0.00189319	0.0313734
Siglech	283.505	0.230874	0.0743624	3.10471	0.00190465	0.0315316
Bmp4	64.3582	0.279181	0.0899442	3.10394	0.00190964	0.0315826
Ccl12	10.7839	0.212376	0.068433	3.10341	0.00191305	0.0316074
Gls2	1112.99	-0.153517	0.0494729	-3.10306	0.00191531	0.0316131
Psmc5	5657.61	-0.164091	0.0529174	-3.10089	0.00192939	0.0317837
Gabra3	3063.3	-0.100917	0.0325446	-3.10088	0.00192949	0.0317837
Mef2c	519.015	0.184687	0.0595915	3.09923	0.00194028	0.0319295
Trnp1	2434.51	-0.185716	0.0600028	-3.09513	0.00196726	0.0323414
Ndufb6	1111.13	-0.142152	0.045943	-3.09409	0.00197414	0.0324223
Tmem150c	1700.07	-0.123835	0.0400287	-3.09366	0.00197704	0.0324375
Pde8b	1101.19	-0.144349	0.0466663	-3.09322	0.00197996	0.0324533
Arhgdig	957.024	-0.154002	0.0497971	-3.09259	0.00198416	0.0324604
Bnip3	2482.6	-0.148104	0.0478904	-3.09257	0.00198432	0.0324604
Tulp3	715.654	0.156091	0.0504856	3.09179	0.00198953	0.0325134
Aldh1a7	22.4777	-0.243012	0.0786177	-3.09106	0.00199444	0.0325615
Kcna1	15708.6	-0.146499	0.0474237	-3.08915	0.0020073	0.0327389
Pbk	12.8561	0.215045	0.0696259	3.08857	0.0020112	0.0327702
Als2cl	1188.64	0.213064	0.0690061	3.08761	0.00201774	0.0328445
Arhgap24	583.846	-0.177798	0.0576105	-3.08621	0.00202722	0.0329663
AI504432	432.407	0.238137	0.0771761	3.08564	0.00203116	0.0329978
Scn4a	6.46947	0.160423	0.0520415	3.08261	0.00205197	0.0333031
1700017B05Rik	330.889	0.221022	0.0718237	3.07729	0.00208895	0.03387
Map1lc3a	2701.67	-0.139121	0.0452151	-3.07687	0.0020919	0.0338846
Pou3f3	1315.93	-0.173082	0.0562746	-3.07567	0.00210033	0.0339459
Zmat5	1412.58	-0.17886	0.0581684	-3.07487	0.00210595	0.0339459
Cacnb4	3744.53	-0.0928212	0.0301842	-3.07516	0.00210392	0.0339459
Mccc1os	111.46	-0.270776	0.0880481	-3.07532	0.00210279	0.0339459
Aox4	33.2878	-0.258857	0.0841827	-3.07494	0.00210546	0.0339459
Clk1	2077.54	0.187093	0.06086	3.07415	0.00211105	0.0339608
Sap30l	796.735	-0.206041	0.0670301	-3.07387	0.00211305	0.0339608
Clec2l	1107.52	-0.160509	0.0522151	-3.074	0.00211209	0.0339608
Gna14	150.945	-0.282794	0.092053	-3.07208	0.00212572	0.0341313
Nectin2	168.841	0.250086	0.0814308	3.07115	0.00213239	0.0342052
Slc25a27	1924.71	-0.143513	0.0467361	-3.0707	0.00213557	0.0342229
Hsd17b11	1112.4	-0.182751	0.0595427	-3.06924	0.00214604	0.0343575
Parp3	338.28	0.249578	0.0813543	3.06779	0.00215651	0.0344917
Nedd4	12633	0.0801562	0.0261379	3.06667	0.00216461	0.0345877
Fbxo44	2948.86	-0.125533	0.0409493	-3.06557	0.00217258	0.0346816
Rundc3a	4861.64	-0.0865535	0.028247	-3.06416	0.0021828	0.0347616
Fam43b	544.354	-0.209964	0.0685248	-3.06406	0.00218358	0.0347616
Cav2	821.937	0.201213	0.0656697	3.06401	0.00218391	0.0347616
Wdr1	3556.02	0.0834177	0.0272278	3.0637	0.00218617	0.0347641
Uqcrq	1646.22	-0.155499	0.0507689	-3.06288	0.0021922	0.0348265
Tomm7	901.275	-0.146055	0.0476997	-3.06197	0.00219886	0.0348987
Acy3	227.367	-0.252862	0.0826306	-3.06015	0.00221224	0.0350775
Ddr2	265.775	0.281426	0.0920093	3.05866	0.00222326	0.0352183
Dna2	89.0109	0.274172	0.0896792	3.05726	0.00223373	0.0353502
Fbln2	157.707	0.2787	0.091202	3.05586	0.00224416	0.0354813
Yipf3	1096.52	-0.132338	0.0433358	-3.05377	0.00225985	0.0356953
Aplp1	35841	-0.135254	0.0443247	-3.05144	0.00227749	0.0359395
Lix1l	667.497	0.167118	0.0547908	3.05011	0.00228756	0.0360296
Pag1	1016.23	0.151514	0.0496713	3.05034	0.00228582	0.0360296
Gls	4554.53	0.179463	0.0588521	3.04939	0.00229306	0.0360818
Cdk16	6393.94	-0.101424	0.0332651	-3.04895	0.00229641	0.0361001
Dab2	385.794	0.268149	0.0880048	3.04698	0.00231151	0.0363029
Fam120b	2555.41	-0.0977874	0.0320979	-3.04653	0.00231496	0.0363226
Ap2a1	6771.45	-0.104002	0.0341613	-3.04443	0.00233121	0.0365429
Wdfy4	101.284	0.273886	0.0899958	3.04332	0.00233983	0.0366433
Plcb2	96.267	0.275137	0.0904925	3.04044	0.00236235	0.0369609
Plbd2	3413.69	-0.125139	0.0411824	-3.03866	0.00237629	0.0371439
Gjc2	1911.42	-0.235842	0.077626	-3.03818	0.00238015	0.037169
Atp5d	3485.95	-0.133984	0.044123	-3.03659	0.00239269	0.0373295
Tle3	1094.48	0.173435	0.057128	3.0359	0.00239821	0.0373805
Ptk2b	224.734	0.241903	0.0797075	3.03488	0.00240628	0.0374708
Smoc1	431.021	0.270266	0.0891097	3.03296	0.00242166	0.0376748
Lypd6	429.816	-0.19045	0.0628258	-3.0314	0.00243422	0.0378346
Tdrp	729.701	-0.198677	0.0656018	-3.02853	0.00245748	0.0381603
Tpm4	1015.41	0.213324	0.0704522	3.02792	0.00246244	0.0382013
Dpcd	1071.71	-0.168473	0.0556757	-3.02597	0.0024784	0.0384129
Dok7	904.729	-0.142794	0.0472269	-3.02358	0.00249803	0.0386808
Btk	42.8923	0.272411	0.0901182	3.02282	0.00250432	0.0387419
Vxn	1310.08	-0.159533	0.0527843	-3.02235	0.00250817	0.0387652
Peg10	1952.85	0.183652	0.0607865	3.02126	0.00251727	0.0388107
Cope	1767	-0.122678	0.0406034	-3.02137	0.00251633	0.0388107
Arl4a	395.469	0.203915	0.0674958	3.02115	0.00251816	0.0388107
Siglec1	26.5163	0.226324	0.0749459	3.01984	0.00252911	0.0389432
Tvp23a	1325.55	-0.149208	0.0494168	-3.01937	0.00253301	0.0389669
Pcdh11x	455.529	-0.180817	0.059894	-3.01895	0.00253652	0.0389845
Smyd2	1873.15	-0.139718	0.046334	-3.01546	0.00256589	0.0393434
Cplx1	28388.9	-0.152998	0.0507317	-3.01583	0.00256277	0.0393434
Entpd2	429.386	0.24769	0.0821436	3.01533	0.00256701	0.0393434
Ppfia3	2654.23	-0.103951	0.0344832	-3.01453	0.00257377	0.0394103
Hspb6	297.966	0.243679	0.0809048	3.01192	0.00259604	0.0397146
Tmtc1	2685.99	-0.114494	0.0380208	-3.01134	0.00260096	0.039753
Lrrtm3	638.219	-0.174334	0.0579008	-3.0109	0.00260474	0.0397741
Ngfr	156.349	0.232841	0.0773652	3.00963	0.00261565	0.0399038
Ccnb2	16.507	0.240172	0.079867	3.00715	0.00263707	0.0401935
Rnasel	311.476	-0.21961	0.0730775	-3.00517	0.00265436	0.0404197
Tgif2	138.807	0.261802	0.0871476	3.00413	0.00266346	0.0405209
Slc16a9	171.944	0.236862	0.0788893	3.00247	0.00267801	0.0407048
Ppp1r13b	1940.59	-0.131546	0.043828	-3.00141	0.00268731	0.0408085
Atp1b3	3990.4	0.154427	0.0514662	3.00055	0.00269496	0.0408872
Was	41.8284	0.273002	0.0910043	2.99988	0.00270088	0.0409393
Cybrd1	109.818	0.275666	0.0921117	2.99274	0.00276487	0.0418504
Casp1	53.8575	0.275796	0.092159	2.99261	0.00276605	0.0418504
Parm1	882.945	-0.179426	0.0599751	-2.99168	0.00277451	0.0419019
Insyn1	2334.8	-0.116232	0.0388518	-2.99167	0.00277453	0.0419019
Sfrp1	734.806	-0.182358	0.0609669	-2.99111	0.00277969	0.0419417
Borcs5	614.051	-0.166792	0.0557695	-2.99075	0.00278295	0.0419524
Ppp1r9b	7804.2	-0.0913038	0.030539	-2.98974	0.00279212	0.0419758
Limk1	6238.29	-0.144118	0.048196	-2.99024	0.00278754	0.0419758
Ccdc91	1521.89	-0.138362	0.0462779	-2.98981	0.0027915	0.0419758
Ifnar2	418.718	0.177868	0.0595168	2.98854	0.00280316	0.0421034
Acss2	2184.64	-0.130071	0.0435302	-2.98807	0.00280745	0.0421297
Ggt7	3124.14	-0.123464	0.0413396	-2.98659	0.00282108	0.0422957
Map7d1	7031.7	-0.0960359	0.0321719	-2.98509	0.00283494	0.0424649
Gpr179	187.824	0.267155	0.0895188	2.98434	0.0028419	0.0424921
Dhdds	2329.44	-0.129648	0.0434409	-2.98447	0.0028407	0.0424921
Neurl1b	47.7545	0.270112	0.0905217	2.98395	0.00284557	0.0425086
Slc27a4	2865.46	-0.119028	0.039898	-2.98331	0.00285153	0.0425592
Sgcg	13.3739	0.192205	0.0645071	2.9796	0.00288624	0.0430383
Gm15612	2331.73	-0.131001	0.0439772	-2.97884	0.00289346	0.0430692
Tubg1	983.331	-0.141509	0.0475048	-2.97883	0.00289352	0.0430692
Rgs20	223.113	0.233932	0.0785668	2.97749	0.00290622	0.0432192
Dnajc15	608.87	-0.187354	0.0629762	-2.975	0.00292989	0.0435321
Erlin2	1478.37	0.142808	0.0480123	2.97441	0.00293557	0.0435773
Sms	3054.11	-0.109918	0.0369898	-2.97159	0.00296267	0.04394
Calm1	48700.7	-0.111873	0.0376646	-2.97025	0.00297555	0.0440613
Lmo2	378.914	0.197074	0.0663505	2.97019	0.00297618	0.0440613
Rasa4	317.767	0.20904	0.0703996	2.96933	0.00298448	0.0441447
Asph	3503.59	-0.126372	0.0425814	-2.96777	0.00299973	0.0443305
Mcf2	637.915	-0.205709	0.0693241	-2.96735	0.0030038	0.044351
Ak4	678.367	0.164504	0.0554636	2.96599	0.00301713	0.0445081
Atp10b	244.355	-0.228097	0.0769244	-2.96521	0.00302479	0.0445813
Dynlrb1	1904.94	-0.10899	0.036803	-2.96144	0.00306201	0.0450897
Ppp1r1a	326.594	0.259635	0.0876863	2.96095	0.00306687	0.0451209
Ecm2	280.312	0.233831	0.0790364	2.95852	0.00309123	0.0454389
Olig2	1277.59	-0.226915	0.0767414	-2.95689	0.00310764	0.0456395
Adgrg2	110.14	0.268526	0.0908316	2.95631	0.00311346	0.0456438
Klhl4	1113.64	-0.169813	0.0574384	-2.95644	0.00311217	0.0456438
Sla	79.8134	0.269961	0.0913353	2.95572	0.00311942	0.0456906
Clmp	846.645	-0.186226	0.0630366	-2.95426	0.00313422	0.0458667
Gpr65	11.7236	0.208633	0.0706361	2.95364	0.00314051	0.0459181
Slc6a9	7932.54	-0.136905	0.0463633	-2.95286	0.0031484	0.0459522
Acot7	7966.7	-0.10289	0.0348417	-2.95308	0.00314624	0.0459522
Wdtc1	2163.86	-0.127828	0.0433016	-2.95204	0.00315684	0.0459942
Tigar	1068.41	-0.169396	0.0573816	-2.9521	0.00315624	0.0459942
Rnf38	1136.29	0.132771	0.045007	2.95002	0.00317753	0.0462547
Plat	1161.3	0.224768	0.0762178	2.94903	0.00318777	0.046363
Ipo11	1148.32	-0.139598	0.0473743	-2.94671	0.00321178	0.046671
Rapgef3	1749.64	0.165029	0.0560185	2.94598	0.00321938	0.0467404
Cd72	144.278	0.238131	0.0808823	2.94417	0.0032382	0.0469724
Kcnab3	2682.47	-0.132132	0.0448985	-2.9429	0.00325155	0.0471247
Magi3	1585.49	-0.144622	0.0491555	-2.94214	0.00325956	0.0471994
Cldn10	1135.25	-0.233348	0.0793252	-2.94166	0.00326453	0.0472299
Ifit3	267.144	0.266252	0.0905504	2.94037	0.00327822	0.04737
Ccdc136	2532.44	-0.125044	0.0425289	-2.94021	0.00327995	0.04737
Bcas1os2	1018.57	-0.213172	0.0725293	-2.93911	0.00329154	0.047496
Lamp5	6013.08	-0.175815	0.05985	-2.93759	0.00330771	0.047646
Sike1	545.054	0.154495	0.0525904	2.9377	0.00330656	0.047646
Gbp2	167.776	0.260036	0.0885814	2.93556	0.0033295	0.0479182
Oat	2273.02	0.101946	0.034773	2.93177	0.00337034	0.0484356
Mast2	3580.72	-0.100371	0.0342365	-2.93168	0.00337132	0.0484356
Hint1	2919.29	-0.118078	0.0402829	-2.93122	0.00337634	0.0484357
Herc6	195.057	0.22258	0.0759361	2.93114	0.00337719	0.0484357
Tmem150b	2696.25	-0.159472	0.0544192	-2.93043	0.00338489	0.048504
Bub1b	130.955	0.2697	0.0920667	2.92939	0.00339625	0.0486246
Ap1b1	5974.17	-0.157693	0.0538503	-2.92837	0.00340747	0.0487418
Tmem132b	1663.41	-0.14435	0.0492982	-2.92811	0.00341033	0.0487418
Cd7	6.53848	-0.174824	0.0597256	-2.92712	0.00342117	0.0488545
Nsg1	6681.41	-0.140011	0.0478507	-2.926	0.00343353	0.0489549
Dnaja4	1279.45	-0.152076	0.0519751	-2.92594	0.00343413	0.0489549
Ppp1r3f	958.416	-0.140182	0.0479226	-2.92518	0.00344253	0.0490323
Afap1l2	316.453	0.219444	0.0750318	2.92467	0.00344818	0.0490705
Thsd7a	1797	-0.150075	0.0513232	-2.92413	0.00345425	0.0491146
Rab4b	1529.56	-0.122096	0.04179	-2.92165	0.00348178	0.0494528
Dock6	714.087	0.223151	0.0763839	2.92144	0.00348414	0.0494528
Rps4x	4220.88	0.11561	0.0395836	2.92065	0.003493	0.0494528
Alpk1	190.693	0.241563	0.0827065	2.92073	0.00349216	0.0494528
9930111J21Rik1	13.4705	0.221183	0.0757243	2.92089	0.00349028	0.0494528
Abr	9023.66	-0.0883376	0.0302513	-2.92013	0.00349891	0.049494
St14	37.3565	0.263543	0.0902803	2.91916	0.00350971	0.0496043
Napa	4356.15	-0.101474	0.0347767	-2.91788	0.00352415	0.0497658
D2hgdh	291.239	0.188419	0.0645899	2.91716	0.00353239	0.0498396
Agl	2463.1	-0.128588	0.0440867	-2.91671	0.0035375	0.0498691
Sacs	3325.52	-0.134978	0.0462871	-2.9161	0.00354439	0.0499236
Ube3b	2611.13	-0.120744	0.0414336	-2.91416	0.00356643	0.0501913
Shc3	3491.39	-0.102307	0.0351184	-2.91319	0.00357759	0.0503055
Arap1	883.828	0.19532	0.0671065	2.9106	0.00360731	0.0506803
Plch1	649.224	-0.156339	0.053732	-2.90961	0.00361884	0.0507991
Lacc1	117.068	0.262588	0.0902928	2.90818	0.0036354	0.0509449
Gjc3	3938.96	-0.161801	0.055636	-2.90821	0.00363509	0.0509449
Eno2	24340.7	-0.123966	0.0426397	-2.9073	0.00364565	0.0510452
Ptprz1	5158.54	0.109742	0.0377677	2.90572	0.00366414	0.0512173
Cdh19	589.003	-0.172627	0.059405	-2.90593	0.00366167	0.0512173
Fam163a	175.98	0.263471	0.0908203	2.90102	0.00371953	0.0519476
Thy1	13489.9	-0.126005	0.0434416	-2.90057	0.00372486	0.0519781
Aip	2125.98	-0.126297	0.0435559	-2.89965	0.00373584	0.0520873
Slc1a1	2211.67	-0.103444	0.0357027	-2.89736	0.00376317	0.05238
Fads2b	202.35	0.255529	0.0881878	2.89756	0.00376078	0.05238
Smim12	957.7	-0.15614	0.0539168	-2.89595	0.00378013	0.0525719
Fam78b	740.093	-0.147708	0.0510277	-2.89466	0.00379565	0.0527154
Slc25a25	3565.93	-0.133345	0.0460673	-2.89457	0.00379683	0.0527154
Igfbp5	2417.88	0.261986	0.0905294	2.89393	0.00380449	0.0527397
Lrfn5	941.971	-0.148276	0.0512376	-2.89389	0.00380497	0.0527397
Ankrd12	1013.26	0.16278	0.0562626	2.89322	0.0038131	0.0528081
Akr1b8	43.4064	0.264789	0.0915586	2.89202	0.00382773	0.0529663
Sqle	2272.59	-0.149548	0.0517206	-2.89146	0.00383462	0.0530172
Isg20l2	299.307	0.205448	0.0710619	2.89111	0.0038388	0.0530307
Casp3	207.955	0.220248	0.0762136	2.88987	0.00385399	0.0531072
Gjb1	1993.7	-0.170919	0.0591416	-2.89	0.00385245	0.0531072
Maml2	346.081	0.186503	0.064535	2.88996	0.00385291	0.0531072
Maob	655.907	0.165423	0.0572477	2.8896	0.00385733	0.053109
Pirb	18.2683	0.241845	0.0837422	2.88797	0.00387732	0.0533398
Pdlim5	1100.73	0.138198	0.0478578	2.88768	0.00388099	0.0533459
Ttbk1	3102.71	-0.123221	0.0426935	-2.88618	0.00389946	0.0535553
Ankub1	111.041	-0.262169	0.0908759	-2.88491	0.00391523	0.0536826
Fbxo40	169.194	-0.256523	0.0889152	-2.88503	0.00391377	0.0536826
Cflar	624.466	0.184695	0.0640488	2.88366	0.00393083	0.0538517
Pttg1ip	1757	0.123617	0.0428808	2.88281	0.00394141	0.0539519
Shisa4	2446.37	-0.142655	0.0495446	-2.87932	0.00398538	0.0544636
Lamtor3	743.953	-0.150153	0.0521477	-2.87939	0.00398447	0.0544636
Slc2a12	95.2666	0.255213	0.0887365	2.87607	0.00402659	0.0548453
Fgf18	164.599	-0.250924	0.087223	-2.87682	0.00401711	0.0548453
Col16a1	2169.96	0.173048	0.0601669	2.87614	0.00402572	0.0548453
Tagln	269.903	0.235751	0.0819637	2.87629	0.0040238	0.0548453
Cdk2	89.2942	0.257034	0.0893837	2.87562	0.00403237	0.0548787
Neurl3	50.351	0.264119	0.0918771	2.8747	0.00404415	0.0549938
Ankrd34a	729.944	-0.147439	0.051301	-2.87401	0.00405302	0.055069
Xk	670.168	-0.170065	0.0591873	-2.87334	0.00406157	0.0551399
Smpd3	523.177	0.218247	0.0760634	2.86928	0.00411407	0.0558067
Smo	745.701	0.172855	0.0602781	2.86763	0.00413556	0.0560523
Emp2	715.953	0.243583	0.0850786	2.86303	0.00419608	0.0568259
Psap	39775.9	0.0753916	0.0263354	2.86274	0.00419991	0.0568312
Pyroxd2	54.3394	0.262377	0.0916658	2.86232	0.00420555	0.056861
1500009C09Rik	1858.62	-0.170847	0.0597266	-2.86048	0.00423002	0.057145
Hpcal1	1562.86	-0.140705	0.0491956	-2.86011	0.00423488	0.057164
Opn4	50.1486	-0.257804	0.0901466	-2.85983	0.00423865	0.0571682
Itpkb	5263.44	0.132425	0.0463338	2.85807	0.00426223	0.0572686
Igsf6	46.6339	0.263805	0.0923	2.85813	0.00426148	0.0572686
Slc16a2	579.569	0.222984	0.0780117	2.85834	0.00425858	0.0572686
Ifnlr1	52.7251	-0.263502	0.0921986	-2.85798	0.00426343	0.0572686
Grin2b	1611.93	-0.150286	0.0525695	-2.8588	0.00425244	0.0572686
Abca9	286.808	0.239979	0.0839808	2.85754	0.00426933	0.0573013
Pappa	259.85	-0.263395	0.0921866	-2.85719	0.00427403	0.0573179
Csdc2	4575.93	-0.164603	0.0576159	-2.85691	0.00427787	0.0573228
Rab3a	10460.2	-0.131244	0.0459603	-2.8556	0.00429558	0.0574581
E2f1	233.595	-0.205122	0.0718406	-2.85524	0.00430042	0.0574581
Acy1	437.421	-0.177949	0.0623261	-2.85513	0.00430188	0.0574581
Il1r1	140.038	0.263193	0.0921635	2.85572	0.00429393	0.0574581
Tpgs2	1437.88	-0.138857	0.0486828	-2.85228	0.00434067	0.0579093
Eya4	112.06	0.243614	0.0854147	2.85213	0.00434267	0.0579093
Serpine1	24.7768	0.239113	0.0838462	2.85181	0.00434714	0.0579221
Foxj1	836.001	-0.160559	0.0563226	-2.85069	0.0043624	0.0580786
Il1a	24.7993	0.244423	0.0857684	2.84981	0.0043746	0.0581941
Pkn1	999.451	0.125394	0.0440153	2.84888	0.0043874	0.0583175
Cdk4	804.413	0.14693	0.0515941	2.84782	0.00440201	0.0584646
Cartpt	165.335	-0.256047	0.0899772	-2.84569	0.00443149	0.0588013
Tmem255a	2852.14	-0.15014	0.0527692	-2.84522	0.00443804	0.0588013
Irak4	97.6765	0.249112	0.087553	2.84527	0.00443739	0.0588013
Mkrn1	2674.22	-0.103541	0.0363948	-2.84495	0.00444183	0.0588044
Tmem25	2253.48	-0.109318	0.0384511	-2.84304	0.00446849	0.05911
Fchsd1	3626.21	-0.150026	0.0528125	-2.84073	0.00450107	0.0594933
Vamp2	7924.74	0.127145	0.0447681	2.84008	0.00451023	0.059532
Tpp1	2592.23	0.0954258	0.0336005	2.84001	0.0045112	0.059532
Dennd1c	63.9782	0.260912	0.0919392	2.83787	0.00454151	0.0598841
Pcx	3251.39	-0.0985687	0.0347414	-2.83721	0.00455096	0.0599609
Cables2	1478.35	-0.144749	0.0510578	-2.83501	0.00458237	0.0602606
Ubc	4494.73	-0.136262	0.0480666	-2.83486	0.00458465	0.0602606
Cd36	23.3939	0.224809	0.079295	2.83509	0.00458124	0.0602606
Rab11fip5	3332.34	-0.119981	0.0423311	-2.83435	0.00459194	0.0602997
Mrgprf	17.6682	0.162951	0.0574957	2.83414	0.00459492	0.0602997
Cpxm2	212.844	0.256413	0.0904951	2.83344	0.00460498	0.0603838
Maged2	2072.17	-0.102952	0.0363454	-2.83261	0.00461692	0.0604354
Ndufc2	1336.31	-0.130882	0.0462042	-2.8327	0.00461567	0.0604354
Pprc1	645.824	0.174602	0.0616446	2.83241	0.0046199	0.0604354
Ptpn18	42.498	0.260421	0.0921055	2.82742	0.00469253	0.061337
Rps18	2317.74	0.1187	0.0420064	2.82577	0.00471672	0.0615558
Rgs19	246.361	0.206668	0.073132	2.82596	0.00471397	0.0615558
Gstm5	2332.64	-0.152027	0.0538355	-2.82391	0.00474412	0.0618645
Glrx5	889.141	-0.172451	0.0611199	-2.82152	0.00477973	0.0622797
Mast4	3388.15	-0.127916	0.0453463	-2.82086	0.00478949	0.0623577
Pik3cb	1220.99	-0.133235	0.0472744	-2.81833	0.00482739	0.0628016
2700054A10Rik	87.4918	0.257056	0.0912229	2.81789	0.00483402	0.0628384
Igsf21	493.172	-0.168651	0.0598811	-2.81643	0.00485604	0.0630751
Enc1	1762.78	0.144819	0.0514342	2.81561	0.00486845	0.0631866
Ly6e	2141.37	0.105434	0.0374585	2.8147	0.00488226	0.063316
Pacsin1	10787.3	-0.120887	0.0429577	-2.8141	0.00489141	0.063385
Ripk1	218.745	0.209534	0.0744805	2.81327	0.004904	0.0634983
Ccnb1	12.9709	0.204441	0.0726884	2.81257	0.00491479	0.0635883
Oplah	886.924	0.160411	0.0570468	2.81192	0.00492465	0.063666
Ndufs8	1706.03	-0.135282	0.0481403	-2.81016	0.00495174	0.0639661
Cited2	449.151	0.168696	0.0600509	2.80922	0.00496614	0.0641021
Elovl2	634.017	-0.222548	0.079237	-2.80864	0.00497517	0.0641684
Sapcd1	157.284	-0.243685	0.0868168	-2.80688	0.00500232	0.0644185
Adcyap1r1	7124.46	0.0932009	0.0332044	2.80688	0.00500236	0.0644185
Gal3st4	183.075	0.218913	0.0780733	2.80395	0.00504814	0.0649575
Gale	283.18	-0.188155	0.0671273	-2.80295	0.00506369	0.0651068
Nomo1	3667.44	-0.0980497	0.0349857	-2.80256	0.00506981	0.0651348
Nat8	57.7408	-0.258075	0.0921335	-2.8011	0.00509291	0.0653808
Nudt3	5778.1	-0.110581	0.0394814	-2.80084	0.00509695	0.0653819
Sac3d1	206.756	-0.228784	0.0817202	-2.7996	0.00511657	0.0655826
Tmcc2	5828.06	-0.120027	0.0428874	-2.79866	0.00513156	0.0657238
Ahsa1	2973.1	-0.120032	0.0429015	-2.79786	0.00514426	0.0658354
Samsn1	42.1189	0.249854	0.0893159	2.79742	0.00515119	0.065873
Dmxl2	5505.26	-0.128798	0.0460569	-2.79649	0.00516611	0.0660127
Cyp27a1	1210.2	-0.169973	0.0608046	-2.7954	0.00518355	0.0660935
Smdt1	1693.5	-0.123836	0.0443122	-2.79462	0.00519601	0.0660935
Ehbp1l1	363.13	0.174673	0.0624873	2.79534	0.00518451	0.0660935
Efhd2	3471.65	0.114588	0.0410033	2.7946	0.00519644	0.0660935
Man2b2	1080.33	0.131197	0.046931	2.79554	0.0051813	0.0660935
Shroom2	2789.88	-0.0998756	0.0357328	-2.79507	0.00518887	0.0660935
Trib2	1096.55	-0.141688	0.050759	-2.7914	0.00524809	0.0666479
Foxp1	615.295	0.16933	0.0606595	2.79148	0.00524669	0.0666479
Rbm12	363.704	0.182718	0.0654708	2.79084	0.00525719	0.0667122
Stxbp2	336.46	0.174939	0.0626955	2.7903	0.00526589	0.0667271
A930006I01Rik	38.1976	-0.24063	0.0862391	-2.79027	0.00526644	0.0667271
Pln	24.743	0.201726	0.072325	2.78916	0.00528452	0.0669048
Tnip2	296.096	0.209112	0.0750019	2.78809	0.00530201	0.0670749
Lxn	1333.53	0.197407	0.0708166	2.78758	0.00531029	0.0671282
Dnajc21	924.515	-0.167955	0.0602638	-2.787	0.00531984	0.0671976
Cldn11	10001.4	0.171723	0.0617043	2.783	0.00538593	0.0679805
Med14	1562.11	-0.108393	0.0389734	-2.7812	0.0054158	0.0683052
Tmem204	242.636	-0.230196	0.0827837	-2.78069	0.00542427	0.0683599
Psmb7	2222.94	-0.146387	0.0526566	-2.78002	0.0054355	0.0684492
Fam111a	81.5906	0.255415	0.0918998	2.77927	0.00544807	0.0685553
Mageh1	625.079	-0.153232	0.0551447	-2.77873	0.00545712	0.0686168
Ehd3	3104.07	-0.130058	0.0468134	-2.77823	0.00546566	0.068672
Txnrd3	271.878	-0.21755	0.0783214	-2.77766	0.00547515	0.0686931
Ajuba	66.3679	0.255881	0.0921221	2.77763	0.00547566	0.0686931
Dlgap2	342.344	-0.183911	0.0662176	-2.77737	0.0054801	0.0686967
Sp140	31.7084	0.246604	0.0888238	2.77633	0.00549765	0.0687988
Borcs6	701.535	-0.178083	0.0641476	-2.77615	0.00550074	0.0687988
Mylip	286.282	0.212616	0.0765773	2.77649	0.0054949	0.0687988
Ldhb	14722.8	-0.150022	0.0540528	-2.77548	0.00551209	0.0688887
Tmx2	5754.7	-0.14236	0.0513024	-2.77493	0.00552135	0.0689521
Bad	546.55	-0.154347	0.0556324	-2.7744	0.00553031	0.0689598
Bmp1	1109.73	0.157244	0.0566743	2.77451	0.00552841	0.0689598
Rian	10064	-0.104603	0.0377094	-2.77393	0.00553843	0.069009
Rap2b	461.713	0.19238	0.0693963	2.77219	0.00556804	0.0693089
Sh3d19	664.657	0.184453	0.066541	2.77202	0.00557089	0.0693089
Kctd9	1909.98	-0.183973	0.066382	-2.77143	0.005581	0.0693825
Nkd1	642.314	-0.182891	0.0660223	-2.77014	0.00560325	0.0695965
Rec8	484.457	0.186266	0.0672453	2.76994	0.00560664	0.0695965
Lrig1	3254.83	0.140717	0.0508142	2.76925	0.00561855	0.0696397
Atp2b2	14109	-0.104053	0.0375718	-2.76946	0.00561499	0.0696397
Sdc4	3091.04	0.19388	0.0700253	2.76872	0.00562774	0.0697013
Vat1l	4751.89	-0.115528	0.0417582	-2.76659	0.00566451	0.0701041
Chrna2	93.3253	-0.253792	0.0918002	-2.76462	0.00569896	0.0704777
Tmeff2	2017.58	-0.144338	0.0522607	-2.76188	0.00574701	0.0710188
Gpr176	404.439	-0.206373	0.0747617	-2.76042	0.00577277	0.0712838
Impa2	167.102	-0.227265	0.0823412	-2.76004	0.00577936	0.0713119
Zbtb34	301.696	0.201348	0.0729699	2.75933	0.00579198	0.0714142
Carlr	72.7261	-0.253764	0.092034	-2.75728	0.00582842	0.07181
Rps4l	554.636	0.242352	0.0879312	2.75615	0.00584855	0.0720043
Slc9a3r2	1684.62	-0.133933	0.0486129	-2.7551	0.00586748	0.0721836
Egfl6	237.99	-0.230429	0.0836509	-2.75464	0.00587559	0.0722296
Myadml2	209.437	-0.222718	0.0809433	-2.75153	0.00593179	0.0728121
Sdf4	7354.32	-0.0738594	0.0268419	-2.75165	0.00592963	0.0728121
Oga	5246.19	0.0865569	0.0314908	2.74864	0.00598431	0.0734022
Fgf11	1643.42	-0.169048	0.0615313	-2.74736	0.00600776	0.0736352
Apcdd1	649.235	0.188023	0.0684528	2.74676	0.00601881	0.0737159
Dynll2	21048.1	-0.131666	0.0479533	-2.74571	0.00603797	0.0738958
Ckmt1	8083.17	-0.150024	0.0546851	-2.74342	0.00608037	0.0743597
Rp2	336.895	0.189239	0.0690006	2.74258	0.00609593	0.0744398
Cryzl2	362.971	0.184345	0.0672109	2.74279	0.00609204	0.0744398
Ccdc82	834.044	0.13284	0.0484475	2.74194	0.00610767	0.074528
Tuba4a	10206.4	-0.148134	0.0540751	-2.73942	0.00615481	0.0750478
Elf1	261.448	0.214271	0.0782633	2.73782	0.00618479	0.0753439
Mvk	610.998	-0.147473	0.0538688	-2.73764	0.00618822	0.0753439
Angpt1	198.88	0.249555	0.0911897	2.73666	0.00620669	0.0754577
Mcur1	538.667	0.151383	0.0553155	2.73672	0.00620556	0.0754577
Sv2b	3595.65	-0.185938	0.0679586	-2.73605	0.00621807	0.0754849
Ifngr1	507.38	0.179707	0.0656763	2.73625	0.00621437	0.0754849
Plekhb2	8499.82	-0.104017	0.0380241	-2.73555	0.00622759	0.075545
Pcdhgb2	172.203	0.232094	0.084896	2.73386	0.00625965	0.0758781
Pde6b	27.209	-0.217694	0.0796479	-2.73321	0.00627209	0.0759732
Crim1	2192.16	-0.121895	0.0446106	-2.73243	0.0062869	0.0760968
Slc16a3	60.2344	0.252314	0.0923557	2.73198	0.00629551	0.0761453
Fam110b	594.104	-0.148592	0.0544008	-2.73142	0.00630613	0.0762179
Gm38462	63.617	-0.250773	0.091826	-2.73096	0.00631501	0.0762269
Fndc10	991.877	-0.165065	0.0604456	-2.73079	0.0063182	0.0762269
Atg7	797.838	-0.134266	0.0491742	-2.73042	0.00632533	0.0762269
Nlrp3	35.7905	0.248161	0.0908813	2.73061	0.00632174	0.0762269
Ccdc84	216.826	0.201288	0.0737496	2.72934	0.00634605	0.0763096
Myo1c	664.844	0.190634	0.0698344	2.7298	0.00633723	0.0763096
Cdca2	10.5271	0.185316	0.0678968	2.72938	0.00634536	0.0763096
Gjc1	107.252	0.245768	0.0900825	2.72826	0.006367	0.0765059
Tppp3	4803.1	-0.178089	0.0652908	-2.72764	0.00637901	0.0765944
Hacd4	67.9363	0.251571	0.0923267	2.72479	0.00643424	0.0772015
Flywch1	12031.3	-0.0935208	0.0343504	-2.72255	0.00647796	0.0776697
Hebp1	251.465	0.187177	0.068827	2.71953	0.00653753	0.0783271
Cxadr	365.818	0.198887	0.073148	2.71897	0.00654864	0.0783762
Fam189a2	384.252	0.167345	0.0615503	2.71884	0.00655112	0.0783762
1700034G24Rik	10.685	-0.192919	0.0709685	-2.71838	0.00656019	0.0784279
Kcnk4	148.314	-0.222794	0.0819721	-2.71793	0.00656921	0.078479
Rpl10	2972.38	0.0977615	0.0359746	2.71751	0.00657744	0.0785206
Ramp1	1476.63	-0.130692	0.0480988	-2.71716	0.00658451	0.0785482
Fmnl3	425.292	0.206158	0.0759205	2.71545	0.00661857	0.0788975
Tnfrsf21	3209.93	-0.12208	0.0449743	-2.71445	0.00663868	0.0790233
Myot	11.5424	0.115576	0.0425755	2.71461	0.00663546	0.0790233
Map1a	51494.2	-0.104884	0.0386461	-2.71395	0.00664866	0.0790851
Casq2	88.8106	0.246824	0.0909757	2.71307	0.00666623	0.079237
Gal	107.157	0.250291	0.0922785	2.71235	0.00668084	0.0792971
Frs2	1779.5	-0.112833	0.0415998	-2.71235	0.00668089	0.0792971
Pkm	38525.1	-0.129532	0.0477734	-2.71138	0.00670037	0.0794336
Asb2	62.7307	0.249189	0.0919077	2.7113	0.006702	0.0794336
Efnb2	307.007	0.223944	0.0826361	2.71	0.00672832	0.0796884
Slc7a1	1680.48	0.114422	0.0422351	2.70917	0.0067451	0.0797309
Pmvk	1053.63	-0.117715	0.0434514	-2.70911	0.00674639	0.0797309
Akna	181.401	0.234088	0.0863941	2.70954	0.00673769	0.0797309
Filip1l	77.6477	0.248758	0.0918622	2.70794	0.00677016	0.0799547
Alox5ap	85.8561	0.240194	0.0887324	2.70695	0.00679051	0.0801378
Ppm1h	1564.75	-0.125479	0.0463721	-2.70592	0.00681147	0.0803278
Slc25a4	17239.2	-0.11688	0.0432064	-2.70517	0.00682702	0.0804537
Lrpprc	2194.24	-0.128854	0.0476378	-2.70487	0.00683311	0.0804681
Naalad2	61.7709	0.249528	0.0922658	2.70444	0.00684188	0.0805139
Pgm5	745.408	0.236015	0.0872831	2.70402	0.00685061	0.0805592
Mira	504.142	-0.242927	0.0898817	-2.70275	0.00687694	0.0807678
Abca6	182.736	-0.235634	0.0871852	-2.70269	0.00687812	0.0807678
Dag1	2806.57	0.111192	0.0411472	2.70231	0.00688604	0.0807897
Slc10a4l	15.0975	-0.20211	0.0747968	-2.70213	0.00688976	0.0807897
Mapk9	8424.01	-0.0997591	0.0369276	-2.70148	0.00690324	0.0808903
Isoc1	958.28	-0.162927	0.0603426	-2.70004	0.00693311	0.0811827
Rnf157	10887.9	-0.121286	0.0449466	-2.69846	0.00696621	0.0815126
Trafd1	839.313	0.132591	0.0491802	2.69603	0.00701717	0.0820508
Mbnl2	5456.36	-0.104887	0.0389447	-2.69324	0.00707623	0.0825128
Eef1a2	28487.5	-0.113542	0.0421559	-2.69339	0.00707285	0.0825128
Gpr88	299.771	0.151571	0.0562797	2.69317	0.00707755	0.0825128
Acot11	3481.96	-0.145387	0.0539884	-2.69292	0.00708285	0.0825128
Amz1	178.231	0.224409	0.0833386	2.69274	0.00708665	0.0825128
Trim12c	110.446	0.232819	0.0864572	2.69288	0.00708371	0.0825128
Ret	3675.13	-0.165098	0.061329	-2.692	0.00710247	0.0826387
Lrp12	1461.12	-0.11016	0.0409549	-2.68978	0.00714985	0.0830147
Pank1	764.65	-0.158062	0.0587609	-2.68992	0.00714685	0.0830147
Pvr	181.705	0.210991	0.0784394	2.68986	0.0071483	0.0830147
Sv2c	4900.74	-0.191311	0.0711905	-2.68732	0.00720288	0.0835717
1700086O06Rik	84.8967	-0.236782	0.0881469	-2.68622	0.0072265	0.0837869
Th	119.941	0.240328	0.0894806	2.68581	0.0072354	0.0838312
Efna2	172.633	-0.204783	0.0762621	-2.68525	0.00724761	0.0839138
Clk4	1192.67	0.130177	0.0485166	2.68315	0.00729312	0.0842636
Ncdn	23889.5	-0.105288	0.03924	-2.68317	0.00729285	0.0842636
H2-DMb1	48.1988	0.243913	0.0908961	2.68343	0.00728719	0.0842636
Atcay	4977.05	-0.103401	0.0385413	-2.68285	0.00729974	0.0842812
Osbpl7	1291.65	-0.179272	0.0668823	-2.6804	0.00735336	0.0846635
Rasgrf2	3399.57	-0.113437	0.0423175	-2.68063	0.00734841	0.0846635
Gm10814	133.756	-0.22464	0.0837905	-2.68097	0.00734102	0.0846635
Lamp2	3475.78	0.13117	0.048928	2.68087	0.00734311	0.0846635
Cenpm	34.3794	-0.244511	0.0912376	-2.67994	0.00736348	0.0847211
Tango2	1979.23	-0.111479	0.0416028	-2.6796	0.00737106	0.0847493
Mybpc3	31.3349	-0.237949	0.0888361	-2.67851	0.00739496	0.0849649
Tmem72	5.92324	0.115209	0.0430307	2.67738	0.00742006	0.0851941
Igsf9	91.2018	0.243216	0.0908974	2.67572	0.00745683	0.0854974
Ddr1	5233.42	0.129888	0.0485429	2.67573	0.00745668	0.0854974
Cntfr	2623.85	-0.14414	0.0539225	-2.67309	0.00751558	0.0861112
Ttc9b	320.818	-0.20508	0.0767283	-2.67281	0.00752178	0.0861226
Mcmbp	612.789	0.138752	0.051918	2.67252	0.00752833	0.0861379
Gpr173	331.049	0.17129	0.0641481	2.67023	0.00757996	0.0866686
H2bc4	547.627	-0.159872	0.0598774	-2.66999	0.00758535	0.0866702
Arv1	273.843	0.186208	0.0697978	2.66782	0.0076346	0.0871727
Hipk4	1184.25	-0.134501	0.0504379	-2.66667	0.00766065	0.0874097
Tmem151a	6299.39	-0.141407	0.0530357	-2.66627	0.00766985	0.0874543
Prkar1b	15115.4	-0.078324	0.0293823	-2.66569	0.00768311	0.0875451
Lgals9	280.541	0.229483	0.0861006	2.66529	0.00769221	0.0875884
Htra3	189.637	0.199628	0.0749306	2.66417	0.00771776	0.0878187
Mfap3	519.088	0.16589	0.0622985	2.66282	0.00774892	0.0881127
Psmd3	2510.05	-0.0926593	0.0348046	-2.66227	0.00776149	0.0881948
Luzp1	5387.45	-0.130562	0.0490747	-2.66048	0.00780292	0.0886048
Ndufa11	1682.27	-0.111913	0.0420706	-2.66012	0.00781134	0.0886394
Prss53	128.684	0.219448	0.0825344	2.65887	0.00784037	0.0886411
Mir100hg	1522.87	0.119524	0.0449465	2.65926	0.00783127	0.0886411
Atp5o	3777.65	-0.12321	0.0463375	-2.65896	0.0078382	0.0886411
4930447M23Rik	84.1311	-0.241012	0.0906101	-2.65988	0.0078169	0.0886411
Phf13	324.963	0.176163	0.0662367	2.65959	0.00782347	0.0886411
Dock5	1941.93	-0.141006	0.0530353	-2.65873	0.00784368	0.0886411
Mfsd12	1018.89	-0.136462	0.0513495	-2.65752	0.0078718	0.0887161
Clstn1	20559.1	-0.0850213	0.0319903	-2.65772	0.00786709	0.0887161
Bace1	3968.66	-0.104931	0.0394768	-2.65804	0.00785971	0.0887161
Hsd17b2	71.4722	-0.242272	0.091157	-2.65775	0.0078665	0.0887161
Atf4	2508.12	0.117097	0.0440702	2.65706	0.00788264	0.0887777
Nkx2-2	313.018	-0.22325	0.0840454	-2.6563	0.00790041	0.0889173
Cnnm2	746.03	-0.139772	0.0526313	-2.65568	0.00791497	0.0890206
Mpc2	1154.79	-0.164756	0.062092	-2.65341	0.0079683	0.0895594
Nrarp	204.997	-0.224575	0.0846893	-2.65175	0.00800764	0.0898792
Dlgap3	2108.48	-0.15172	0.0572105	-2.65195	0.00800279	0.0898792
Yap1	517.401	0.14887	0.0561474	2.65142	0.00801546	0.0899059
Phf2	1363	0.113726	0.0429036	2.65074	0.00803154	0.0899533
Chst9	28.362	-0.228137	0.0860713	-2.65055	0.00803601	0.0899533
Aldoa	29335.4	-0.0975401	0.0367937	-2.651	0.00802539	0.0899533
Lypd6b	676.945	-0.165238	0.0623635	-2.64959	0.00805888	0.0900871
Xlr3a	55.2543	-0.235422	0.08885	-2.64965	0.00805743	0.0900871
Gm16897	109.378	0.237003	0.0894853	2.64852	0.00808462	0.0903138
Rabl6	3330.65	-0.0851506	0.0321686	-2.64701	0.00812065	0.0906549
Zfp105	143.521	0.207917	0.078563	2.64651	0.00813282	0.0907296
Kcna2	14312.5	-0.114459	0.0432711	-2.64516	0.00816532	0.0909079
Ttc39b	2341.85	-0.119156	0.0450402	-2.64555	0.00815574	0.0909079
Smim18	96.2989	-0.23466	0.088712	-2.64519	0.00816454	0.0909079
Cyc1	3625.26	-0.120965	0.0457354	-2.64489	0.00817169	0.0909177
Rnf152	960.424	0.155777	0.0589204	2.64385	0.00819691	0.0911369
Hdac5	4250.83	-0.0975658	0.0369193	-2.64268	0.00822535	0.0913916
Maff	60.9225	0.24369	0.0922545	2.6415	0.00825391	0.0916472
Dctn3	1171.71	-0.121646	0.0460695	-2.6405	0.00827838	0.091816
Otud7a	802.996	-0.139106	0.0526834	-2.64042	0.00828022	0.091816
Slc22a3	16.1874	0.188974	0.0716018	2.63924	0.00830915	0.0920749
Pnkd	11354.8	-0.120627	0.0457126	-2.63882	0.00831949	0.0921278
Trappc12	1849.58	-0.0938324	0.0355715	-2.63786	0.0083432	0.0923285
Lpin1	2817.06	-0.122869	0.0465914	-2.63716	0.00836031	0.0924558
Piezo2	281.248	0.216781	0.0822277	2.63635	0.00838044	0.0926164
Psmd9	595.172	-0.138161	0.0524223	-2.63553	0.00840058	0.092777
Rnf41	1718.41	-0.103498	0.0392908	-2.63414	0.00843507	0.0930562
Pls3	4166.94	-0.114582	0.0435	-2.63406	0.00843712	0.0930562
Ppp4r4	794.644	-0.132954	0.0504808	-2.63375	0.00844466	0.0930772
Tbcb	1558.39	-0.112768	0.0428223	-2.6334	0.0084534	0.0931114
Mboat2	1029.24	-0.114397	0.0434497	-2.63287	0.00846679	0.0931968
Susd6	1326.73	0.141955	0.0539299	2.63222	0.0084829	0.0933119
Tbc1d20	1079.97	0.108736	0.0413145	2.63192	0.00849036	0.0933275
Edil3	6623.38	-0.127358	0.0483935	-2.63171	0.00849561	0.0933275
Tagap	51.1483	0.242778	0.0923224	2.62967	0.00854674	0.0938267
Pla2g3	297.118	-0.226723	0.0862474	-2.62875	0.00856988	0.0939559
Krt222	1306.86	-0.160437	0.0610267	-2.62897	0.00856432	0.0939559
Loxl4	33.5951	-0.212557	0.0808788	-2.6281	0.00858637	0.0940624
Zcchc12	2205.62	0.141688	0.0539171	2.6279	0.00859149	0.0940624
Gsap	167.475	0.213854	0.081385	2.62769	0.00859667	0.0940624
Mapkapk2	960.888	0.121224	0.0461484	2.62684	0.00861831	0.0941744
Efnb3	6315.56	-0.127495	0.048534	-2.62692	0.00861616	0.0941744
Bin1	7571.64	-0.0861335	0.0328077	-2.62541	0.00865448	0.0945071
Map3k21	82.6624	-0.232983	0.0887514	-2.62513	0.00866171	0.0945237
Scd2	23503.3	-0.133483	0.0508778	-2.62361	0.00870029	0.0948567
Bcl7b	978.912	-0.10868	0.0414258	-2.62348	0.00870372	0.0948567
Abcf2	2483.9	-0.0937822	0.0357525	-2.62309	0.0087135	0.0949007
Cacng7	4022.42	-0.0949779	0.0362239	-2.62197	0.00874236	0.0951524
Irgm1	316.114	0.168108	0.0641428	2.62084	0.00877143	0.0953431
Liph	16.8161	0.205407	0.07837	2.62099	0.00876748	0.0953431
Cnr2	13.0074	0.197901	0.0755482	2.61953	0.00880515	0.0954163
6430548M08Rik	7577.23	-0.0861943	0.0328998	-2.6199	0.00879555	0.0954163
Igdcc4	2212.47	0.114433	0.0436829	2.61964	0.00880231	0.0954163
Adcy6	1335.61	0.159679	0.060951	2.61979	0.00879846	0.0954163
Tmem273	15.48	0.202402	0.0772687	2.61946	0.00880704	0.0954163
Arnt	1048.86	0.120628	0.0460853	2.6175	0.0088577	0.0959023
Nek6	703.129	0.139506	0.0533402	2.6154	0.00891225	0.0962168
Car14	1845.96	-0.15407	0.0588988	-2.61584	0.0089008	0.0962168
Cyp4x1os	28.2273	-0.228852	0.0875035	-2.61535	0.00891357	0.0962168
Camk1	1032.64	0.139215	0.0532302	2.61533	0.00891412	0.0962168
Serpinb8	18.913	0.205325	0.0785102	2.61526	0.00891586	0.0962168
Zc3h11a	2543.92	0.0915567	0.0350239	2.61412	0.00894569	0.0964125
Ucp2	1255.99	0.154913	0.0592602	2.61412	0.00894565	0.0964125
Epha5	1088.54	0.165328	0.0632494	2.6139	0.0089515	0.0964125
Tubb6	296.762	0.185908	0.0711416	2.61321	0.00896972	0.0965458
Tmem189	2164.06	-0.130198	0.049851	-2.61174	0.00900819	0.0968892
Dsn1	108.142	0.22543	0.0863206	2.61155	0.00901336	0.0968892
Pcmt1	3947.06	-0.101149	0.0387582	-2.60974	0.00906109	0.097339
Agt	4952.47	0.158138	0.0606023	2.60943	0.00906927	0.0973635
Stk24	1742.44	-0.142948	0.0547923	-2.6089	0.00908344	0.0974523
Serpinb1a	951.215	-0.178332	0.0683619	-2.60864	0.00909029	0.0974625
Pou4f1	241.111	0.200286	0.0767958	2.60803	0.00910654	0.0975734
Hlf	1615.45	0.156571	0.0600627	2.60679	0.0091396	0.0978642
Pml	273.41	0.185435	0.0711597	2.6059	0.00916323	0.0980537
Crb2	100.253	0.227551	0.0873397	2.60535	0.00917801	0.0981483
Nrm	72.0813	0.23798	0.0913601	2.60486	0.00919119	0.0982256
Epb41l1	21973.4	-0.0981642	0.0377139	-2.60287	0.00924474	0.0986703
St3gal2	2609.56	-0.0920392	0.0353581	-2.60306	0.00923953	0.0986703
Eci1	469.777	-0.144904	0.0557136	-2.60087	0.00929883	0.0991835
Vgll4	731.634	-0.143371	0.0551531	-2.5995	0.00933595	0.0995152
Slc7a3	167.467	0.212888	0.0819247	2.59858	0.0093611	0.099719
Cab39	6378.53	-0.102404	0.0394121	-2.59829	0.00936895	0.0997383
Fn1	2237.16	0.224369	0.0863979	2.59693	0.00940615	0.100048
Cnot2	1094.49	0.124747	0.048039	2.59678	0.00941012	0.100048
Pfn2	9813.71	-0.115966	0.044684	-2.59524	0.00945237	0.100371
Dpy19l2	7.75648	0.168136	0.0647866	2.59523	0.00945269	0.100371
B230312C02Rik	194.114	-0.193802	0.0746867	-2.59487	0.00946263	0.100412
Pgr15l	50.9286	0.235475	0.0907813	2.59387	0.00949019	0.10064
Rimklb	1149.58	0.136287	0.0525534	2.59331	0.00950582	0.100741
Camk2n2	3280.19	-0.132315	0.051033	-2.59273	0.00952169	0.100844
Mpped1	1471.23	-0.165671	0.0639262	-2.5916	0.00955318	0.101113
LOC102632463	92.6116	-0.232211	0.0896219	-2.591	0.00956965	0.101223
Sipa1l1	3478.33	-0.09604	0.0370766	-2.59031	0.00958896	0.101311
Cd83	1750.83	-0.103211	0.0398459	-2.59026	0.00959028	0.101311
Sccpdh	4309.28	-0.160828	0.0621166	-2.58913	0.00962175	0.101514
Gbgt1	30.1238	0.224835	0.0868322	2.58931	0.00961689	0.101514
Tmem150a	323.599	0.162019	0.0625858	2.58875	0.00963255	0.101563
Melk	7.56934	0.162764	0.0628818	2.58841	0.00964209	0.101599
Mtch1	6626.98	-0.0724743	0.0280262	-2.58595	0.00971106	0.102226
Psmb8	108.57	0.231526	0.0895359	2.58585	0.00971397	0.102226
Slit3	355.965	-0.205031	0.0792981	-2.58557	0.00972168	0.102242
Emilin2	768.959	-0.177933	0.0688384	-2.58479	0.00974389	0.102379
Surf1	1340.49	-0.116645	0.0451332	-2.58445	0.00975337	0.102379
Trim2	9135.65	-0.0884416	0.0342194	-2.58455	0.0097507	0.102379
Cd99l2	4216.58	-0.117351	0.0454127	-2.5841	0.00976337	0.102419
Slitrk4	749.021	-0.148637	0.0575276	-2.58376	0.00977304	0.102456
Mthfsd	1301.6	-0.116242	0.0450068	-2.58276	0.00980127	0.102686
Alox12	18.7582	0.205611	0.0796263	2.58219	0.00981747	0.102764
Zmiz1	3438.28	0.102436	0.0396855	2.5812	0.00984578	0.102764
Srsf7	1875.67	0.11453	0.0443709	2.58119	0.00984597	0.102764
Ntng2	315.629	-0.184676	0.0715325	-2.58171	0.00983108	0.102764
Magi2	2034.72	-0.09172	0.0355309	-2.58142	0.00983958	0.102764
Pgrmc1	3287.02	0.117769	0.045622	2.5814	0.0098401	0.102764
Brdt	256.082	-0.181395	0.0703292	-2.57924	0.00990193	0.103022
Eml2	6969.57	-0.108036	0.0418804	-2.57962	0.00989082	0.103022
Pik3c3	1272.48	-0.109004	0.0422516	-2.57989	0.00988331	0.103022
Celf6	365.786	0.205822	0.0797791	2.5799	0.00988297	0.103022
Kcnj2	282.458	0.188091	0.072924	2.57928	0.00990079	0.103022
Gapdh	3460.55	-0.123221	0.0477792	-2.57896	0.00990977	0.103039
Plaat1	603.96	-0.159947	0.062029	-2.57858	0.00992061	0.103087
Rab37	1403.8	-0.171933	0.0667107	-2.57729	0.00995784	0.103279
Ppp1r14b	267.316	0.199391	0.0773626	2.57736	0.0099559	0.103279
Ghsr	43.1523	-0.236571	0.0917813	-2.57755	0.00995032	0.103279
Gtpbp2	1433.46	0.106503	0.0413281	2.57702	0.00996559	0.103295
Khk	354.25	-0.171908	0.0667262	-2.57632	0.00998586	0.10344
Src	1459.35	0.112048	0.0435068	2.57541	0.0100123	0.103648
Gfm1	1346.05	-0.139332	0.0541131	-2.57483	0.010029	0.103756
Entpd1	337.876	0.191196	0.0742757	2.57414	0.0100489	0.103828
Magi1	3943.26	-0.0906827	0.0352311	-2.57394	0.0100548	0.103828
Crybb1	71.3965	-0.237322	0.092191	-2.57424	0.010046	0.103828
Spock2	20654.8	-0.0986845	0.0383846	-2.57094	0.0101423	0.104319
Gabrg2	2835.43	-0.126391	0.0491615	-2.57093	0.0101425	0.104319
Zyx	1914.2	-0.100641	0.0391395	-2.57134	0.0101306	0.104319
Tpi1	10994.2	-0.121995	0.0474495	-2.57104	0.0101393	0.104319
Ano10	989.426	-0.129721	0.0504467	-2.57145	0.0101273	0.104319
Chic1	1567.97	-0.134508	0.0523083	-2.57145	0.0101273	0.104319
Cnih3	171.622	0.236089	0.091835	2.5708	0.0101465	0.104319
Ttll4	769.835	0.13295	0.0517448	2.56935	0.010189	0.10469
Hrk	123.62	0.232012	0.0903077	2.56912	0.0101956	0.104694
Rrp7a	2189.66	-0.10808	0.0420882	-2.56793	0.0102307	0.104989
Mog	5347.94	-0.152679	0.0594763	-2.56706	0.0102564	0.105187
Vstm2a	1997.57	-0.135574	0.0528244	-2.56651	0.0102727	0.105244
Egr3	100.519	0.236278	0.0920641	2.56645	0.0102747	0.105244
Pgghg	213.664	0.198394	0.0773346	2.56539	0.0103058	0.105498
Map2k4	5576.97	-0.109763	0.0428119	-2.56384	0.0103522	0.105776
Bola2	457.488	-0.156865	0.0611763	-2.56415	0.010343	0.105776
Clec5a	47.8514	0.23583	0.09198	2.56393	0.0103494	0.105776
Ppp2r1a	10129.4	-0.0942509	0.0367954	-2.56149	0.0104225	0.106363
Mrpl42	955.488	-0.136448	0.0532653	-2.56167	0.0104171	0.106363
Twsg1	752.001	0.199367	0.0778553	2.56073	0.0104451	0.106527
Traf3ip3	49.1926	0.235539	0.0919938	2.56037	0.0104559	0.106572
Capn6	73.7164	0.232897	0.0909802	2.55987	0.0104713	0.106662
Tns3	3814.92	0.131334	0.0513189	2.55918	0.010492	0.106807
Atp2a3	228.75	0.212011	0.0828637	2.55855	0.0105109	0.106934
Aatk	14291.4	-0.115571	0.0451866	-2.55763	0.0105388	0.107
Gpsm3	63.0944	0.233772	0.0913892	2.55798	0.0105281	0.107
Tacc2	1435.51	-0.116481	0.045545	-2.55748	0.0105433	0.107
Il10rb	226.041	0.218871	0.0855737	2.55769	0.010537	0.107
Cyp39a1	272.663	-0.203667	0.0796441	-2.55721	0.0105514	0.107017
Slc6a7	741.586	0.173258	0.0677672	2.55667	0.0105679	0.107064
Nup98	1159.16	0.0994414	0.0388954	2.55663	0.010569	0.107064
Tspyl5	1009	-0.126412	0.0494595	-2.55587	0.0105923	0.107103
Prdm6	12.5516	0.136759	0.0535041	2.55605	0.0105868	0.107103
Flt3l	75.4161	0.235961	0.092318	2.55596	0.0105895	0.107103
Pcdhac2	763.274	-0.136449	0.0534054	-2.55497	0.0106196	0.107313
Mob1b	293.241	0.192551	0.0753772	2.5545	0.0106339	0.107392
Etfdh	871.294	-0.129978	0.0509096	-2.55312	0.0106761	0.107753
Phlda3	1459.26	-0.135415	0.0530654	-2.55185	0.0107151	0.108034
Rbm24	62.2793	0.233576	0.0915343	2.55179	0.0107171	0.108034
Gnai3	926.713	0.124554	0.0488738	2.54849	0.0108191	0.108996
Gripap1	2300.12	-0.0816691	0.0320526	-2.54797	0.0108352	0.109091
Scrt1	5755.03	-0.130568	0.0512575	-2.5473	0.010856	0.109234
Banp	418.049	0.207183	0.0813528	2.54673	0.0108739	0.109348
Prelid1	2061.39	-0.106752	0.0419314	-2.54588	0.0109002	0.109524
Lrrtm4	359.228	-0.193343	0.0759478	-2.54574	0.0109047	0.109524
Acadsb	1740.14	0.104226	0.0409489	2.54528	0.0109191	0.109602
Sec13	1378.11	-0.112434	0.0442014	-2.54367	0.0109696	0.110042
Ccdc171	157.137	-0.199374	0.0784586	-2.54114	0.0110491	0.110772
Dcun1d4	3121.17	-0.110313	0.0434193	-2.54064	0.0110648	0.110816
Thap2	496.547	0.167942	0.0661037	2.54058	0.0110668	0.110816
Scyl1	1970.74	-0.108033	0.0425449	-2.53928	0.0111081	0.111162
Scn1a	9535.55	-0.122981	0.0484368	-2.539	0.0111169	0.111182
Thrb	525.324	-0.141727	0.0558306	-2.53852	0.0111323	0.11127
C1ql1	440.092	0.20608	0.0811943	2.5381	0.0111455	0.111334
Fdps	1352.5	-0.111073	0.0437697	-2.53768	0.0111591	0.111402
Lrp1	19230.3	0.137628	0.0542983	2.53467	0.0112553	0.112295
Arid2	976.996	0.117769	0.0464721	2.53418	0.0112711	0.112384
Fam171b	5316.64	-0.0925464	0.0365255	-2.53375	0.0112849	0.112454
Pbx1	1611.48	0.0985574	0.0389238	2.53206	0.0113394	0.112793
Ctnna1	2647.21	0.109348	0.043183	2.5322	0.011335	0.112793
Soga1	2930.76	0.127277	0.050265	2.53213	0.0113373	0.112793
Tmem37	19.7765	0.201012	0.0794252	2.53083	0.0113792	0.113121
Ccnt1	1027.84	0.1157	0.0457347	2.52981	0.0114125	0.113384
Nrxn2	5773.17	-0.107734	0.0425935	-2.52935	0.0114275	0.113397
Lpcat1	816.042	0.120438	0.047613	2.52951	0.0114222	0.113397
Rplp0	4501.14	0.0975789	0.0385859	2.52887	0.0114429	0.113413
Cntnap5b	455.656	-0.170009	0.0672229	-2.52903	0.0114377	0.113413
Gng12	2129.09	-0.117319	0.0463972	-2.52857	0.0114527	0.113442
Ube2v1	1314.37	-0.108611	0.04297	-2.5276	0.0114846	0.11369
Tspan14	879.177	0.140012	0.0554246	2.52618	0.0115312	0.114075
Slc6a1	11120.5	-0.0613305	0.0242798	-2.52599	0.0115373	0.114075
Lrrn2	1530.98	-0.0912896	0.0361477	-2.52546	0.0115546	0.114177
Kif13a	1947.06	0.110757	0.0438814	2.524	0.0116028	0.114586
Pdk2	3089.16	-0.123958	0.0491276	-2.52318	0.0116299	0.114716
Mdm4	2986.33	0.101747	0.0403233	2.52329	0.0116263	0.114716
Brsk2	3479.95	-0.0836351	0.0331571	-2.52238	0.0116562	0.114907
Nkain4	478.149	-0.152632	0.0605499	-2.52076	0.0117101	0.115369
AB124611	13.5531	0.184909	0.0733702	2.52022	0.0117282	0.115439
Nfatc1	206.859	0.195402	0.0775367	2.52013	0.0117312	0.115439
Espl1	47.6639	0.232559	0.0923373	2.51858	0.011783	0.11588
Sox1	214.316	-0.215763	0.0857089	-2.5174	0.0118226	0.1162
Cyb5r1	595.209	0.16085	0.0639025	2.51712	0.0118318	0.116222
Ndnf	336.781	0.217527	0.0864781	2.51539	0.01189	0.116724
Pip5k1c	4598.44	-0.0849633	0.0337877	-2.51462	0.0119161	0.116889
Pimreg	9.1115	0.166467	0.0662036	2.51447	0.011921	0.116889
Etfb	716.115	-0.128682	0.0511934	-2.51365	0.011949	0.117094
Gatd3a	1622.65	-0.120122	0.047804	-2.5128	0.0119777	0.117306
Tapbp	1061.79	0.123956	0.0493351	2.51253	0.0119869	0.117327
Psme1	447.128	0.173343	0.0690287	2.51117	0.0120331	0.11757
Blvrb	202.763	-0.184385	0.0734154	-2.51153	0.0120208	0.11757
Fas	71.1928	0.231921	0.0923556	2.51118	0.0120329	0.11757
Klk6	3104.09	0.22643	0.0901895	2.5106	0.0120525	0.11769
Dctn1	11212.3	-0.0703753	0.0280371	-2.51008	0.0120704	0.117755
Nsdhl	814.769	-0.134434	0.0535594	-2.50999	0.0120734	0.117755
Focad	1235.24	-0.103965	0.0414496	-2.50824	0.0121335	0.118114
Ankrd13a	2087.23	0.135661	0.0540805	2.5085	0.0121246	0.118114
Tusc2	1378.16	-0.115598	0.0460901	-2.50808	0.0121388	0.118114
Desi2	546.199	0.138248	0.0551115	2.5085	0.0121243	0.118114
Snf8	1061.08	-0.11633	0.0463892	-2.50769	0.0121524	0.118176
Bmp6	238.174	0.215662	0.0860849	2.50522	0.0122375	0.118934
Map2	23126.9	-0.0944973	0.0377351	-2.50423	0.0122719	0.119128
Scube1	473.348	-0.189067	0.0754957	-2.50435	0.0122677	0.119128
Apc2	6268.08	-0.115238	0.0460324	-2.50341	0.0123005	0.119335
Cpox	1738.48	-0.146735	0.058619	-2.50319	0.0123079	0.119338
Kif1b	37405.6	-0.0893297	0.0356897	-2.50295	0.0123162	0.119348
Dbnl	1832.8	-0.0859944	0.0343694	-2.50206	0.0123472	0.119365
Rgl2	1314.27	0.113849	0.045494	2.50251	0.0123315	0.119365
Calm2	16269.8	-0.107621	0.0430199	-2.50166	0.0123614	0.119365
Notch2	908.751	0.191912	0.0767119	2.50172	0.012359	0.119365
Ston1	142.932	0.229507	0.0917402	2.50171	0.0123596	0.119365
Cfh	801.679	0.21359	0.0853577	2.50229	0.0123392	0.119365
Pef1	1440.39	-0.116941	0.046764	-2.50067	0.0123959	0.119629
Dgka	371.986	0.154997	0.062009	2.49959	0.0124336	0.119783
Slc38a6	304.425	0.175133	0.0700634	2.49964	0.0124319	0.119783
Gbp7	204.845	0.18842	0.0753783	2.49966	0.0124313	0.119783
Fnta	2188.42	-0.134414	0.0537944	-2.49866	0.0124664	0.120029
Mfhas1	1139.93	0.130395	0.0522076	2.49762	0.012503	0.120312
Ndufs4	1147.43	-0.123787	0.0495695	-2.49724	0.0125163	0.120369
Elk3	256.245	0.182068	0.0729253	2.49664	0.0125377	0.120505
Sarm1	758.764	-0.125642	0.0503338	-2.49617	0.0125542	0.120593
Alkbh6	595.468	-0.143827	0.0576265	-2.49584	0.0125659	0.120636
H4c8	23.8725	-0.216045	0.086588	-2.49509	0.0125925	0.120741
Rcn1	486.142	0.18813	0.0754056	2.49491	0.0125988	0.120741
Spry3	261.488	-0.165324	0.0662642	-2.49493	0.0125984	0.120741
Pcyt2	2562.83	-0.090212	0.0361705	-2.49408	0.0126285	0.120885
Pmm1	2378.19	-0.10408	0.0417296	-2.49415	0.0126259	0.120885
Cd300a	27.2022	0.221741	0.0889286	2.49347	0.01265	0.121021
Pcdhb9	227.812	-0.17521	0.0702926	-2.49258	0.0126819	0.121185
Trim56	151.735	0.20889	0.0837986	2.49276	0.0126755	0.121185
Tnfsf13b	177.965	-0.206773	0.0829677	-2.49221	0.012695	0.121241
Hmox2	2007.08	-0.10968	0.0440146	-2.4919	0.0127063	0.121279
Plekha2	364.74	0.199154	0.0799399	2.4913	0.0127278	0.121414
Grina	10761.2	-0.0918286	0.0368691	-2.49066	0.0127505	0.12156
Parp14	173.943	0.216662	0.0870232	2.48971	0.0127848	0.121767
Frat1	260.882	-0.190161	0.0763808	-2.48965	0.0127869	0.121767
Loxl3	311.094	0.164974	0.0662748	2.48924	0.0128017	0.121768
Panx1	266.996	-0.178295	0.0716242	-2.48932	0.0127988	0.121768
Nras	1210.7	0.140474	0.0564813	2.48709	0.0128793	0.12237
Adra2c	212.692	-0.219157	0.0881184	-2.48707	0.0128799	0.12237
Abcd2	1616.78	-0.116739	0.046944	-2.48676	0.0128911	0.122407
Epb41l2	3183.14	0.139385	0.0560573	2.48647	0.0129018	0.122437
Phactr3	1743.49	-0.106819	0.0429722	-2.48578	0.0129269	0.122535
Prpf38b	1038.89	0.127173	0.0511578	2.48589	0.0129229	0.122535
Celf2	1837.14	0.17539	0.0705769	2.4851	0.0129516	0.122699
Acyp2	648.26	-0.136241	0.0548463	-2.48405	0.0129897	0.122919
Klri1	11.9258	-0.180999	0.0728602	-2.4842	0.0129843	0.122919
Zmym1	585.732	0.166423	0.0670234	2.48306	0.0130259	0.12319
Bop1	967.886	-0.110011	0.0443098	-2.48278	0.0130363	0.123218
Rnf187	5526.14	-0.10653	0.0429153	-2.48234	0.0130523	0.123299
Plagl2	252.439	0.173275	0.0698319	2.48131	0.0130899	0.123583
Lmnb1	228.334	0.186419	0.0751743	2.47982	0.0131449	0.124032
Ackr1	841.807	-0.149565	0.0603288	-2.47916	0.0131693	0.124191
Arsa	1165.08	0.104791	0.0422769	2.47867	0.0131872	0.124219
Capsl	12.4904	0.187955	0.0758229	2.47886	0.0131802	0.124219
Grip1	487.269	-0.143966	0.058122	-2.47696	0.0132508	0.124746
Hmgb2	105.097	0.228573	0.0923223	2.47581	0.0132933	0.125075
Thrsp	492.714	-0.165751	0.0669664	-2.47514	0.0133184	0.12524
Kcnma1	813.478	-0.163778	0.0661779	-2.47481	0.0133307	0.125284
Strn3	1486.21	0.113701	0.0459516	2.47436	0.0133476	0.1253
Lpcat3	600.548	0.140003	0.0565786	2.47448	0.013343	0.1253
Zfp629	739.073	0.124675	0.0503917	2.47412	0.0133565	0.125313
Phf3	1713.16	0.0970544	0.0392473	2.47289	0.0134024	0.12553
Pde1b	3761.3	-0.0701337	0.0283613	-2.47287	0.0134034	0.12553
Uqcc3	278.406	-0.160032	0.0647101	-2.47306	0.0133961	0.12553
Plp2	45.5846	0.224863	0.0909388	2.47269	0.0134101	0.12553
Nectin4	373.007	-0.175	0.0707882	-2.47216	0.0134298	0.125644
Supv3l1	564.74	-0.153173	0.0619961	-2.47069	0.0134853	0.125794
Rtn3	27834.1	-0.0956553	0.0387099	-2.47108	0.0134706	0.125794
Glrb	7799.52	-0.134395	0.0543908	-2.4709	0.0134772	0.125794
Slc7a11	536.295	0.219861	0.0889661	2.47129	0.0134627	0.125794
Spaar	33.0187	-0.216824	0.0877394	-2.47123	0.0134649	0.125794
Il1rl2	30.5891	0.217885	0.0881939	2.47052	0.0134915	0.125794
Lrrc4c	1264.54	-0.11002	0.04454	-2.47014	0.0135062	0.12586
Asb13	2146.17	-0.123348	0.0499505	-2.4694	0.013534	0.126047
Dner	3962.16	0.119557	0.0484447	2.46791	0.0135905	0.126503
Slc35c1	300.98	0.159928	0.0648252	2.46707	0.0136225	0.126729
Dtnb	1365.26	-0.114447	0.0464089	-2.46607	0.0136605	0.12694
1110017D15Rik	26.4954	-0.210264	0.0852617	-2.46611	0.0136591	0.12694
Miga2	2308.37	-0.121138	0.0491546	-2.46444	0.0137229	0.127447
Ddx24	4526.93	-0.0895802	0.0363653	-2.46334	0.0137648	0.127766
Fads2	4799.09	0.123733	0.0502417	2.46275	0.0137875	0.127904
Ap3s2	3056.62	-0.128755	0.0523012	-2.46179	0.0138245	0.128175
Akap12	4021.41	-0.126401	0.0513695	-2.46062	0.0138699	0.128471
Syt11	24446.5	-0.0857724	0.0348589	-2.46056	0.0138719	0.128471
Scn8a	10797.2	-0.102589	0.0416994	-2.4602	0.013886	0.128529
Fam227b	69.1886	-0.223532	0.0908683	-2.45996	0.0138954	0.128544
Dek	950.335	0.140629	0.0571895	2.459	0.0139326	0.128672
Spr	638.867	-0.157846	0.0641903	-2.45904	0.013931	0.128672
Insrr	14.2518	0.150957	0.0613882	2.45906	0.01393	0.128672
Fzd3	1525.48	0.148146	0.0602739	2.45789	0.0139757	0.128998
Timm13	753.307	-0.134799	0.054857	-2.45728	0.0139995	0.129145
Gm10684	104.686	-0.217589	0.0885623	-2.4569	0.014014	0.129207
Myh9	2745.72	0.137784	0.0561074	2.45572	0.0140602	0.129561
Tpcn1	1563.13	0.122878	0.050052	2.455	0.0140886	0.129656
Ggct	333.316	-0.166553	0.067838	-2.45516	0.0140821	0.129656
Pomgnt2	1009.64	-0.111521	0.0454289	-2.45486	0.0140941	0.129656
Mdh2	7278.53	-0.11098	0.0452714	-2.45144	0.0142285	0.130675
Mtpn	3193.93	0.101752	0.0415064	2.45149	0.0142267	0.130675
Tgm2	558.762	0.210984	0.0860648	2.45145	0.0142282	0.130675
Myom3	13.5166	0.142367	0.0581075	2.45006	0.0142832	0.131104
Ybx1	1698.85	0.11784	0.0481119	2.44929	0.0143139	0.131292
Pkd1l2	95.7858	-0.221628	0.0904919	-2.44914	0.0143196	0.131292
Col4a6	77.6733	0.225807	0.0922371	2.44812	0.0143605	0.131521
Gosr1	1331.81	0.088348	0.0360871	2.44819	0.0143575	0.131521
Serpinh1	605.91	0.21685	0.0886464	2.44623	0.0144358	0.132137
Ndufa10	3454.96	-0.127906	0.0523017	-2.44553	0.0144638	0.132296
Gm13446	236.193	-0.186966	0.0764623	-2.4452	0.0144771	0.132296
Rbm5	2271	0.100057	0.0409167	2.44538	0.0144698	0.132296
AI597479	833.538	0.115985	0.0474458	2.44457	0.0145024	0.13238
Cox4i1	9845.16	-0.120839	0.0494311	-2.44459	0.0145015	0.13238
Rev1	646.101	0.12684	0.051908	2.44355	0.0145437	0.132684
Pi4k2a	2677.13	-0.0961952	0.0393773	-2.44291	0.0145693	0.132845
Meis1	530.442	0.139509	0.0571436	2.44137	0.0146317	0.13334
Tmem63a	3775.61	-0.141128	0.0578352	-2.44018	0.0146801	0.133707
Abhd16a	1803.13	-0.0881127	0.036118	-2.43958	0.0147044	0.133774
Crh	109.737	0.108394	0.0444274	2.43979	0.0146956	0.133774
Mat2a	5663.49	0.131986	0.0541104	2.4392	0.0147198	0.133774
Tmem59l	5729.05	-0.098426	0.0403489	-2.43937	0.0147128	0.133774
Bphl	595.909	-0.121503	0.0498252	-2.43858	0.0147451	0.13393
Vapb	5538.94	-0.0912003	0.0374146	-2.43756	0.0147867	0.134234
Tmem209	710.292	0.118096	0.0484669	2.43663	0.0148249	0.134507
Cacna1s	15.5741	0.117827	0.0483712	2.43589	0.014855	0.134706
Dusp5	40.574	0.222029	0.0911797	2.43507	0.0148889	0.134939
Kars	2101.89	-0.0978961	0.0402152	-2.4343	0.0149205	0.135152
Gfra1	2065.14	-0.130263	0.0535226	-2.43378	0.0149419	0.135271
Zfp677	76.5524	0.218328	0.0897341	2.43306	0.0149719	0.135468
Ttll1	867.047	-0.12433	0.0511144	-2.43238	0.0149999	0.135574
Hps4	551.03	0.130921	0.0538222	2.43247	0.0149962	0.135574
Gtf3c3	1085.37	-0.14229	0.058514	-2.43173	0.015027	0.135744
Nlrc5	80.7169	0.224373	0.0922963	2.43101	0.0150568	0.135873
Olfr1033	21.2707	0.207258	0.0852565	2.43099	0.0150577	0.135873
Gnai2	5134.56	0.126472	0.0520308	2.43071	0.0150694	0.135904
Nln	541.441	0.12851	0.0528755	2.43043	0.015081	0.135935
Slc6a17	5448.2	0.15702	0.0646787	2.4277	0.0151951	0.136888
Rbm12b1	131.892	0.207114	0.0853607	2.42634	0.0152521	0.137327
Pcdhga6	284.304	0.189437	0.0780835	2.42609	0.0152626	0.137347
Ppp1r3c	1540.72	0.133695	0.0551433	2.42451	0.0153291	0.13787
Htra1	4608.07	-0.157858	0.0651268	-2.42386	0.0153565	0.137962
Mx1	13.0921	0.158119	0.0652393	2.42367	0.0153644	0.137962
Per1	1423.69	0.223578	0.092236	2.42398	0.0153513	0.137962
Ankzf1	723.74	0.124213	0.05131	2.42083	0.0154852	0.138971
Kif21a	8463.1	-0.092265	0.0381166	-2.4206	0.0154949	0.138983
Arxes1	199.387	-0.188663	0.0779657	-2.41982	0.0155283	0.139207
Kdm5c	2419.89	0.0929589	0.0384312	2.41884	0.01557	0.139354
4930447C04Rik	143.869	0.216244	0.0893941	2.41899	0.0155636	0.139354
Sfxn1	597.936	0.133425	0.0551546	2.41911	0.0155585	0.139354
Bub1	7.81978	0.149873	0.0619704	2.41847	0.015586	0.139422
Bckdhb	688.793	-0.129577	0.0535943	-2.41773	0.0156175	0.139628
H2bu2	173.618	-0.217254	0.0898976	-2.41668	0.0156627	0.139654
Apobec3	100.404	0.219385	0.0907674	2.417	0.0156488	0.139654
Hdhd2	2581.36	-0.103783	0.0429441	-2.41671	0.0156617	0.139654
Ankrd9	311.726	-0.184465	0.0763224	-2.41692	0.0156524	0.139654
Adam11	3835.75	0.0984305	0.0407211	2.41719	0.0156409	0.139654
Rap1gap	6132.66	-0.092349	0.0382189	-2.41632	0.0156782	0.139657
Mad1l1	631.517	-0.125532	0.0519525	-2.41628	0.0156799	0.139657
Pcdhgb4	148.161	0.206578	0.0855048	2.41598	0.015693	0.139698
Apbb3	932.747	-0.118927	0.0492356	-2.41546	0.0157153	0.139746
Ifrd2	140.263	0.203524	0.0842577	2.4155	0.0157138	0.139746
Serinc3	6068.23	0.122487	0.0507321	2.41438	0.0157621	0.140087
Socs2	97.339	0.218272	0.0904782	2.41243	0.0158466	0.140744
Asap3	843.751	0.156175	0.0647418	2.41228	0.0158531	0.140744
Trim12a	71.2686	0.222711	0.0923343	2.412	0.0158652	0.140776
Sned1	549.369	0.201559	0.0835829	2.41149	0.0158876	0.140879
Pde1c	668.945	-0.144247	0.05982	-2.41134	0.0158938	0.140879
Slc1a4	1892.78	0.110063	0.0456574	2.41063	0.0159252	0.141081
Bcas1	16344.4	-0.167842	0.069645	-2.40997	0.0159539	0.14126
Nat8f3	56.9021	-0.222349	0.0923048	-2.40886	0.0160025	0.141614
Adora1	6291.19	-0.0914383	0.0379717	-2.40807	0.0160373	0.141691
Rbm22	627.126	0.122437	0.0508383	2.40837	0.0160239	0.141691
Zfp609	1396.13	0.0986026	0.04095	2.40788	0.0160455	0.141691
Galnt3	24.1697	0.210826	0.0875438	2.40824	0.0160297	0.141691
Phb	2134.23	-0.096314	0.0400028	-2.40768	0.0160541	0.141691
S1pr4	14.4404	-0.179736	0.0746641	-2.40727	0.0160724	0.141773
Fam180a	23.0554	0.159538	0.0662785	2.40708	0.0160805	0.141773
Elovl1	1044.59	-0.139005	0.0577675	-2.40629	0.0161157	0.141856
Chrm1	28.5555	0.210488	0.0874685	2.40644	0.0161088	0.141856
Nadk	1287.24	0.114232	0.0474673	2.40655	0.0161042	0.141856
Peli1	607.447	0.127839	0.0531662	2.40451	0.0161943	0.142472
Tfg	1708.48	-0.105723	0.0439767	-2.40407	0.0162138	0.142567
Pth1r	354.518	0.185018	0.0769716	2.40371	0.0162295	0.14263
Nav2	1411.97	0.121739	0.0506759	2.4023	0.0162921	0.143104
Setd1b	1095.2	0.12689	0.0528393	2.40142	0.0163314	0.143373
Luc7l2	4918.26	0.087606	0.0365071	2.3997	0.0164086	0.143974
Flcn	1371.46	0.111174	0.0463936	2.39633	0.0165601	0.144779
Gps1	1677.56	-0.101777	0.0424715	-2.39635	0.0165594	0.144779
Tmem252	120.386	0.218507	0.0911671	2.39678	0.01654	0.144779
Asap1	2916.04	-0.0833334	0.0347759	-2.3963	0.0165617	0.144779
Arap3	370.23	0.17174	0.0716368	2.39737	0.0165131	0.144779
Tarm1	15.8498	-0.190531	0.0795093	-2.39634	0.0165598	0.144779
2610005L07Rik	195.737	0.199026	0.0830296	2.39705	0.0165278	0.144779
Gstm4	205.94	0.188163	0.0785419	2.3957	0.0165885	0.144936
Ttll7	9522.26	-0.0994164	0.0415023	-2.39544	0.0166002	0.144962
Nudt6	136.926	0.198262	0.0827805	2.39504	0.0166188	0.145048
A630076J17Rik	8.88887	0.1421	0.0593568	2.394	0.0166659	0.145306
Mef2a	2006.86	0.110724	0.0462481	2.39413	0.0166598	0.145306
Nat8f4	336.211	-0.168222	0.0703366	-2.39167	0.0167717	0.146074
Gm9962	191.468	-0.18383	0.0768591	-2.39178	0.0167668	0.146074
Coch	71.3209	0.193243	0.0808198	2.39103	0.016801	0.146165
Cdc42se1	1470.23	0.121378	0.0507714	2.39067	0.0168176	0.146165
9330182L06Rik	1983.89	-0.11461	0.0479304	-2.39117	0.0167948	0.146165
Man2a2	5733.95	0.0890877	0.0372617	2.39086	0.0168088	0.146165
Ctdsp2	1216.49	0.12851	0.053768	2.39008	0.0168449	0.146262
Srrm2	17514.3	0.0931254	0.0389639	2.39004	0.0168464	0.146262
Cdc42ep1	1862.5	-0.168533	0.07054	-2.38918	0.0168859	0.146297
H1f10	252.116	-0.210357	0.0880436	-2.38923	0.0168835	0.146297
Heph	511.49	-0.194844	0.0815478	-2.38933	0.0168792	0.146297
Aqp1	34.0715	0.0975432	0.0408212	2.38952	0.0168702	0.146297
Cd24a	1459.41	-0.218998	0.0916785	-2.38876	0.0169052	0.146311
Ctxn1	359.111	0.184041	0.0770396	2.38892	0.0168982	0.146311
Susd4	3225.91	-0.0894724	0.0374599	-2.38848	0.0169181	0.146346
Pdhb	2639.66	-0.117514	0.0492251	-2.38727	0.016974	0.146536
Gap43	2834.96	0.119951	0.0502438	2.38738	0.0169687	0.146536
Gm2115	466.515	-0.155439	0.0651072	-2.38744	0.0169662	0.146536
AW549877	1877.7	0.0955611	0.04003	2.38724	0.0169755	0.146536
Slc3a2	2959.42	0.0953258	0.0399386	2.38681	0.0169952	0.146629
Eif2b4	722.004	-0.116357	0.0487732	-2.38567	0.0170482	0.146856
Lamb2	1330.5	0.217613	0.0912167	2.38567	0.017048	0.146856
Rab9b	1267.92	-0.105438	0.0441924	-2.38588	0.0170382	0.146856
Abcf3	2118.02	-0.0998844	0.041874	-2.38536	0.0170625	0.146892
Eri3	1924.41	-0.0856089	0.0358918	-2.38519	0.0170701	0.146892
Hoxa4	201.198	0.218919	0.0918194	2.38424	0.0171145	0.147197
Iglon5	2697.92	-0.126446	0.0530411	-2.38392	0.0171294	0.147249
Adap1	4015.83	-0.115675	0.0485298	-2.38358	0.0171449	0.147306
Itga2	20.3727	0.182569	0.0766293	2.3825	0.0171955	0.147664
Gfod1	1988.98	-0.125315	0.0526182	-2.38159	0.0172382	0.147901
Snai2	19.4349	0.190894	0.0801562	2.38153	0.0172411	0.147901
Ttll5	2070.85	-0.114181	0.0479496	-2.38127	0.0172531	0.147927
Dact3	1851.51	-0.182541	0.0766694	-2.38088	0.0172714	0.147973
Tmie	442.839	0.204257	0.0857945	2.38077	0.0172764	0.147973
Prrx1	178.291	0.185818	0.0781199	2.37862	0.0173774	0.148678
Pde5a	161.158	0.218292	0.0917877	2.37823	0.0173961	0.148678
Ndufb2	1084.97	-0.109978	0.0462469	-2.37807	0.0174036	0.148678
Klhl33	914.552	-0.104115	0.0437767	-2.37833	0.0173912	0.148678
Ipo4	2505.93	-0.104359	0.043874	-2.37862	0.0173776	0.148678
Plod2	272.462	0.167279	0.0703523	2.37774	0.0174191	0.148733
Gm17660	10.1458	-0.163003	0.068564	-2.37739	0.0174356	0.148764
Amer1	587.302	-0.136111	0.0572549	-2.37728	0.0174407	0.148764
Shd	881.077	-0.110907	0.0466722	-2.3763	0.0174874	0.148854
Brd3	1105.92	0.0997888	0.0419917	2.37639	0.0174828	0.148854
Nr4a1	277.652	0.187281	0.0788111	2.37633	0.0174857	0.148854
Oasl2	194.567	0.215041	0.0904928	2.37633	0.017486	0.148854
Chd7	838.62	0.128429	0.0540722	2.37515	0.017542	0.149242
Trim30a	109.487	0.216207	0.0910415	2.37482	0.0175575	0.149297
4930429B21Rik	101.405	-0.212683	0.0895743	-2.37437	0.0175789	0.149402
Ldlr	1929.49	-0.138535	0.0583608	-2.37377	0.0176074	0.149568
Clgn	1557.04	-0.155792	0.0656621	-2.37263	0.017662	0.149954
Tfpi	112.549	0.212318	0.0894998	2.37228	0.0176788	0.15002
Lilr4b	6.4814	0.119059	0.0501961	2.37187	0.0176982	0.150108
Cenpf	28.9458	0.200101	0.0844097	2.37059	0.0177598	0.150553
Cnp	24713.9	-0.127157	0.0536653	-2.36944	0.017815	0.150944
Becn1	2120.49	-0.0753737	0.0318164	-2.36902	0.0178351	0.151036
Plcd3	245.193	0.184394	0.0778455	2.36872	0.01785	0.151085
Fkbpl	171.08	-0.185206	0.0782254	-2.36759	0.0179044	0.151468
Gm16740	578.587	-0.124742	0.0526926	-2.36736	0.0179155	0.151484
Osbpl6	3047.74	-0.0711015	0.0300386	-2.36701	0.0179326	0.151551
Fbxo7	2045.22	-0.0954592	0.040346	-2.36601	0.0179808	0.151587
Poc1b	214.33	0.179301	0.0757875	2.36583	0.0179895	0.151587
AW495222	48.5203	-0.217424	0.0918948	-2.36601	0.017981	0.151587
Elob	2076.76	-0.0918588	0.0388168	-2.36647	0.0179585	0.151587
Tmem246	1831.65	-0.0928278	0.0392376	-2.36579	0.0179918	0.151587
Adcyap1	659.039	0.161582	0.068295	2.36594	0.0179842	0.151587
Bsg	8770.69	-0.0789772	0.0333929	-2.36509	0.0180258	0.151795
Ubn1	1138.41	0.113827	0.0481509	2.36397	0.0180805	0.152178
Zfp36l1	719.852	0.190943	0.0808138	2.36275	0.01814	0.152601
4931408D14Rik	52.4084	-0.210975	0.0893047	-2.36242	0.0181563	0.152661
Slc29a1	473.634	0.148883	0.0630493	2.36138	0.0182072	0.153006
Chp1	4476.97	-0.12189	0.051622	-2.3612	0.0182159	0.153006
Patl2	8.71359	-0.14701	0.0622906	-2.36006	0.0182719	0.153398
2900052L18Rik	401.203	-0.210333	0.0891425	-2.35952	0.0182986	0.153545
Armcx2	2879.51	-0.0970664	0.0411453	-2.35911	0.0183186	0.153635
Ctr9	1751.45	-0.0923623	0.0391553	-2.35887	0.0183307	0.153658
Xylt2	644.13	-0.140214	0.0594595	-2.35814	0.0183666	0.153881
Sowahc	451.724	0.140714	0.059696	2.35717	0.0184146	0.153993
Psme2	317.206	0.161598	0.0685572	2.35712	0.0184173	0.153993
Gnl1	3364.16	-0.0871286	0.0369583	-2.35748	0.0183993	0.153993
Wdr76	105.563	0.201995	0.0856796	2.35757	0.0183951	0.153993
Isoc2a	597.537	-0.147161	0.0624676	-2.35579	0.0184832	0.154466
Mogat1	75.3872	-0.212156	0.0901018	-2.35462	0.0185415	0.154797
Rin3	76.8364	0.215038	0.0913238	2.35468	0.0185387	0.154797
Eif4a1	3316.57	0.0818869	0.0347852	2.35408	0.0185688	0.154947
Myl2	16.1577	0.10952	0.0465284	2.35384	0.0185805	0.154965
Slc7a7	76.2939	0.214647	0.0911993	2.3536	0.0185926	0.154989
Tbcd	1774.83	-0.104924	0.0445843	-2.35339	0.0186031	0.154997
L3mbtl4	49.6421	-0.217293	0.0923511	-2.3529	0.0186276	0.155096
2410004I01Rik	14.0935	0.165115	0.0701785	2.35278	0.0186337	0.155096
Serpinb6a	1120.09	-0.137421	0.0584253	-2.35208	0.0186689	0.155311
Mpnd	1630.84	-0.10851	0.0461513	-2.35117	0.0187144	0.155612
Idnk	402.334	-0.138139	0.0587894	-2.34973	0.0187871	0.156137
Tmc7	928.78	-0.132931	0.0566045	-2.34841	0.0188537	0.156611
Kctd8	363.241	-0.173829	0.0740396	-2.34778	0.0188856	0.156798
Rnf215	690.432	0.113987	0.048558	2.34743	0.0189032	0.156865
Ado	2501.37	-0.117455	0.050075	-2.34557	0.0189978	0.157515
Ctbp1	4205.92	-0.0670772	0.028598	-2.34552	0.0190006	0.157515
Amhr2	70.7501	-0.215905	0.0920706	-2.34499	0.0190276	0.157583
Msr1	8.14454	0.140787	0.0600375	2.34499	0.0190278	0.157583
Brinp3	626.226	-0.133707	0.0570386	-2.34415	0.0190703	0.157604
Ckmt2	13.0282	0.101793	0.043427	2.344	0.0190781	0.157604
Smim17	1009.67	-0.129236	0.0551218	-2.34455	0.0190502	0.157604
[truncated: 23,234 more rows]

## Sheet: All_degs
GeneID	Base mean	log2FC	StdErr	Wald-Stats	P-value	P-adj
Itgax	78.2734	1.58357	0.0923031	17.1562	5.64e-66	4.66e-62
Serpina3n	2582.99	1.44345	0.0549314	26.2773	3.48e-152	5.75e-148
Clec7a	105.06	1.37481	0.0922668	14.9003	3.28e-50	6.77e-47
Gpnmb	182.754	1.3378	0.0890405	15.0246	5.07e-51	1.2e-47
Lpl	367.532	1.27789	0.0831916	15.3608	3e-53	9.91e-50
Atf3	85.2104	1.15901	0.0923499	12.5502	3.96e-36	4.68e-33
Cd68	270.511	1.14652	0.0775899	14.7766	2.07e-49	3.8e-46
C4b	4742.83	1.12883	0.0689009	16.3834	2.51e-60	1.38e-56
Ccl3	34.8519	1.01654	0.0881163	11.5363	8.65e-31	7.94e-28
Mpeg1	1272.26	1.00668	0.0639322	15.746	7.32e-56	3.02e-52
Lgals3	226.296	0.997318	0.0922518	10.8108	3.06e-27	1.81e-24
Tyrobp	441.392	0.99546	0.0715228	13.9181	4.92e-44	7.39e-41
Timp1	51.0925	0.979297	0.0922074	10.6206	2.39e-26	1.27e-23
Cst7	32.4717	0.977852	0.0850981	11.4909	1.47e-30	1.21e-27
C3ar1	92.6712	0.921573	0.088686	10.3914	2.71e-25	1.32e-22
Sprr1a	45.7677	0.90726	0.0844405	10.7444	6.3e-27	3.47e-24
Fcrls	533.026	0.869685	0.0785716	11.0687	1.78e-28	1.28e-25
Itgb2	273.42	0.855079	0.0778134	10.9888	4.32e-28	2.98e-25
Mmp12	24.0034	0.844555	0.0797188	10.5942	3.17e-26	1.64e-23
Ly86	339.611	0.842019	0.0776774	10.8399	2.23e-27	1.41e-24
Ccl6	76.8818	0.824863	0.0922168	8.94482	3.73e-19	1.28e-16
Ptprc	183.799	0.808475	0.0861402	9.38557	6.26e-21	2.4e-18
Osmr	226.749	0.806039	0.0793631	10.1564	3.1e-24	1.35e-21
Cd84	124.57	0.801352	0.0861023	9.30698	1.32e-20	4.94e-18
Myo1f	157.904	0.79242	0.0864102	9.17044	4.71e-20	1.69e-17
Lag3	205.102	0.788025	0.0819262	9.61872	6.67e-22	2.69e-19
S100a6	586.398	0.776424	0.0893057	8.694	3.5e-18	1.11e-15
C1qc	1225.44	0.758279	0.0576392	13.1556	1.58e-39	2.18e-36
Cd180	119.922	0.757785	0.0910024	8.32709	8.29e-17	2.36e-14
Cd109	179.423	0.74845	0.0858698	8.7161	2.88e-18	9.33e-16
Trem2	328.329	0.744837	0.0764893	9.7378	2.08e-22	8.59e-20
Nckap1l	375.838	0.741185	0.0635908	11.6555	2.15e-31	2.22e-28
C1qb	1442.5	0.727072	0.0571008	12.7331	3.87e-37	4.92e-34
Ccl9	60.0593	0.721464	0.0921491	7.82931	4.91e-15	1.16e-12
Fcgr2b	97.2024	0.716888	0.0905332	7.91851	2.4e-15	6.02e-13
Olfml3	671.942	0.709227	0.0686563	10.3301	5.15e-25	2.43e-22
C1qa	1516.38	0.694159	0.0612729	11.329	9.43e-30	7.42e-27
Grn	1578.26	0.679239	0.0485206	13.999	1.58e-44	2.61e-41
Laptm5	1033.44	0.670594	0.0582089	11.5205	1.04e-30	9.05e-28
Slc11a1	104.807	0.659881	0.0918428	7.18489	6.73e-13	1.29e-10
Cd52	72.862	0.658182	0.0908608	7.24385	4.36e-13	8.79e-11
S1pr3	238.489	0.656861	0.0838257	7.83603	4.65e-15	1.11e-12
Csf3r	304.311	0.655977	0.0786178	8.34387	7.19e-17	2.08e-14
Ctss	2520.75	0.642698	0.0586859	10.9515	6.54e-28	4.32e-25
Fyb	188.961	0.642331	0.0803355	7.99561	1.29e-15	3.33e-13
Plek	496.983	0.635827	0.0607081	10.4735	1.14e-25	5.72e-23
Ggta1	176.024	0.63563	0.0850682	7.472	7.9e-14	1.63e-11
Fcer1g	179.382	0.627396	0.0829462	7.56388	3.91e-14	8.5e-12
Ctsz	1351.78	0.62661	0.0614903	10.1904	2.19e-24	9.77e-22
Rasal3	124.837	0.625183	0.0845149	7.39731	1.39e-13	2.83e-11
Dock2	182.069	0.623155	0.082768	7.52895	5.12e-14	1.1e-11
Capg	156.943	0.622999	0.0906844	6.86997	6.42e-12	1.13e-09
Itga5	114.657	0.603333	0.0917814	6.57359	4.91e-11	7.12e-09
Fcgr3	315.59	0.593936	0.0775847	7.65532	1.93e-14	4.36e-12
Slc14a1	1035.63	0.592945	0.0513974	11.5365	8.64e-31	7.94e-28
Irf8	187.404	0.591852	0.0893268	6.62569	3.46e-11	5.24e-09
Cyba	126.152	0.58995	0.0865652	6.8151	9.42e-12	1.6e-09
Cd9	1488.6	0.586362	0.0710169	8.25665	1.5e-16	4.2e-14
Hexb	3074.79	0.586196	0.0541849	10.8184	2.82e-27	1.72e-24
Plau	86.1361	0.582605	0.092307	6.3116	2.76e-10	3.46e-08
Cd22	21.0395	0.579878	0.085663	6.7693	1.29e-11	2.1e-09
Top2a	57.3601	0.579425	0.0904511	6.40594	1.49e-10	1.98e-08
Cybb	50.7359	0.577121	0.0898817	6.42089	1.35e-10	1.83e-08
Hk2	136.73	0.575506	0.0862444	6.67297	2.51e-11	3.94e-09
Tlr7	98.1584	0.571113	0.0902968	6.32483	2.54e-10	3.22e-08
Aspg	154.947	0.570898	0.0889373	6.4191	1.37e-10	1.83e-08
Lyz2	527.428	0.569215	0.0903713	6.29863	3e-10	3.7e-08
Naip2	58.7197	0.567968	0.0922104	6.15948	7.3e-10	8.26e-08
Ccl4	14.0602	0.565645	0.0754098	7.50095	6.34e-14	1.34e-11
Lilrb4a	34.3373	0.565326	0.0809736	6.98161	2.92e-12	5.24e-10
Bcl3	48.9919	0.563713	0.0904624	6.23146	4.62e-10	5.49e-08
Slamf9	35.7435	0.563234	0.0911887	6.17658	6.55e-10	7.57e-08
Pik3ap1	137.475	0.557152	0.084119	6.62337	3.51e-11	5.27e-09
P2ry6	62.7859	0.555616	0.0920835	6.03383	1.6e-09	1.71e-07
Ptx3	30.063	0.555161	0.085001	6.53122	6.52e-11	9.13e-09
Hcls1	156.97	0.553871	0.0871577	6.35482	2.09e-10	2.71e-08
Aldh1l2	713.028	0.551783	0.0710023	7.77134	7.77e-15	1.81e-12
Adgre1	143.937	0.551233	0.0870127	6.33509	2.37e-10	3.06e-08
Cebpd	84.1699	0.551167	0.0923137	5.97058	2.36e-09	2.41e-07
Spi1	83.4145	0.551024	0.0890938	6.18476	6.22e-10	7.24e-08
A2m	2868.42	0.549036	0.087477	6.27635	3.47e-10	4.24e-08
Ccn1	138.875	0.546711	0.0922351	5.92737	3.08e-09	3.06e-07
Itgam	756.776	0.544137	0.0570511	9.53771	1.46e-21	5.74e-19
Flnc	997.517	0.542601	0.0923552	5.87516	4.22e-09	4.03e-07
Tent5c	61.9422	0.542213	0.0918636	5.90237	3.58e-09	3.53e-07
Pdpn	219.534	0.540526	0.0823994	6.55982	5.39e-11	7.74e-09
Vav1	123.474	0.54023	0.0838151	6.44549	1.15e-10	1.57e-08
Arpc1b	596.808	0.53677	0.0751774	7.14005	9.33e-13	1.77e-10
Cd14	88.0936	0.535569	0.0908881	5.89262	3.8e-09	3.69e-07
S100a4	47.5245	0.533896	0.0880198	6.06563	1.31e-09	1.43e-07
Csf1r	3041.39	0.533111	0.0493906	10.7938	3.68e-27	2.1e-24
Elf4	57.3433	0.532005	0.0922229	5.76869	7.99e-09	7.21e-07
Cyth4	320.1	0.531702	0.0785489	6.76906	1.3e-11	2.1e-09
Tlr2	140.947	0.529934	0.0880626	6.0177	1.77e-09	1.85e-07
Vim	2602.14	0.529618	0.090921	5.82504	5.71e-09	5.27e-07
Bin2	165.673	0.523329	0.0820708	6.37655	1.81e-10	2.37e-08
Slc15a3	129.449	0.522333	0.0825062	6.33084	2.44e-10	3.12e-08
Tmem176a	410.704	0.521914	0.0797781	6.54207	6.07e-11	8.57e-09
Ctsh	366.3	0.521506	0.0855168	6.09828	1.07e-09	1.18e-07
Crym	20.6914	0.518671	0.0834867	6.21262	5.21e-10	6.15e-08
Blnk	61.1277	0.518467	0.0923303	5.61535	1.96e-08	1.6e-06
Stbd1	80.3938	0.517503	0.0914765	5.65722	1.54e-08	1.31e-06
D17H6S56E-5	82.8882	0.517077	0.0916376	5.64263	1.67e-08	1.41e-06
Pld4	323.744	0.516732	0.0778306	6.63919	3.15e-11	4.87e-09
Tmem176b	875.774	0.51569	0.0601414	8.57463	9.94e-18	3.1e-15
Gpr84	35.3437	0.515227	0.0913693	5.63895	1.71e-08	1.43e-06
Ikzf1	121.871	0.515224	0.0854934	6.02647	1.68e-09	1.76e-07
Tlr13	79.373	0.511001	0.0907295	5.63215	1.78e-08	1.49e-06
Ctsc	295.347	0.51026	0.0834213	6.11666	9.56e-10	1.06e-07
Ggt5	166.392	0.504825	0.0894689	5.64246	1.68e-08	1.41e-06
Cd86	58.4744	0.503631	0.0919903	5.47482	4.38e-08	3.35e-06
Rbp1	222.805	0.502262	0.0922688	5.44347	5.23e-08	3.92e-06
Ppl	28.3582	0.501871	0.0844555	5.94243	2.81e-09	2.85e-07
Ptpn6	155.094	0.501457	0.0825477	6.07476	1.24e-09	1.36e-07
Ctsd	14100.3	0.500615	0.0444354	11.2661	1.93e-29	1.45e-26
Dhrs1	2267.29	0.500472	0.0546545	9.15701	5.34e-20	1.88e-17
Anxa3	315.491	0.497393	0.0733084	6.78494	1.16e-11	1.96e-09
Hmox1	185.177	0.497043	0.0749092	6.63528	3.24e-11	4.95e-09
Arhgap25	81.7569	0.495892	0.0910254	5.44784	5.1e-08	3.85e-06
Arhgap45	308.831	0.4945	0.0816525	6.05615	1.39e-09	1.5e-07
Arhgdib	169.33	0.490021	0.0793617	6.17452	6.64e-10	7.61e-08
Inpp5d	380.393	0.487096	0.0620214	7.85369	4.04e-15	9.96e-13
Lat2	111.049	0.485569	0.0853427	5.68964	1.27e-08	1.1e-06
Aif1	110.625	0.483806	0.0877724	5.51205	3.55e-08	2.74e-06
Ncf1	209.996	0.48294	0.0829754	5.82028	5.88e-09	5.39e-07
Hpgd	250.842	0.478983	0.0799302	5.99251	2.07e-09	2.13e-07
Cd53	170.164	0.477421	0.083522	5.71612	1.09e-08	9.53e-07
Cx3cr1	1278.33	0.476818	0.0582303	8.1885	2.65e-16	7.16e-14
Cd63	1284.13	0.476478	0.0617252	7.71935	1.17e-14	2.68e-12
Cd300c2	89.9335	0.476382	0.0908402	5.24418	1.57e-07	1.1e-05
Ssc5d	162.469	0.474139	0.090481	5.2402	1.6e-07	1.12e-05
Hk3	73.6968	0.472003	0.0905391	5.21325	1.86e-07	1.27e-05
Runx1	51.8067	0.47101	0.0911339	5.16832	2.36e-07	1.57e-05
Emp3	81.8708	0.470739	0.0923435	5.0977	3.44e-07	2.2e-05
Egr1	810.932	0.4699	0.0664718	7.06916	1.56e-12	2.89e-10
Csf2rb	54.7706	0.468427	0.0921403	5.08385	3.7e-07	2.33e-05
Casp12	86.4923	0.46387	0.0923406	5.02347	5.07e-07	3.09e-05
Capn3	140.431	0.461893	0.0833076	5.54444	2.95e-08	2.3e-06
Lcp2	78.5228	0.459463	0.0891877	5.15164	2.58e-07	1.7e-05
Tagln2	419.274	0.459026	0.0809882	5.66781	1.45e-08	1.24e-06
Ifi30	99.9646	0.456528	0.0890635	5.12586	2.96e-07	1.93e-05
Siglecf	28.2494	0.455145	0.0861504	5.28314	1.27e-07	9.04e-06
Hspb1	619.413	0.454681	0.0779303	5.83446	5.4e-09	5.01e-07
Cd44	510.529	0.454622	0.0922146	4.93004	8.22e-07	4.73e-05
Fos	367.61	0.45281	0.0763649	5.92955	3.04e-09	3.04e-07
Dock8	185.825	0.452449	0.081522	5.55002	2.86e-08	2.24e-06
Tifab	93.5689	0.447736	0.0900063	4.9745	6.54e-07	3.87e-05
Emp1	215.346	0.446876	0.0899027	4.97066	6.67e-07	3.94e-05
Hck	80.6225	0.445341	0.0899827	4.94919	7.45e-07	4.34e-05
Socs3	91.1498	0.443032	0.088907	4.9831	6.26e-07	3.73e-05
Sash3	59.5733	0.442631	0.0918291	4.82016	1.43e-06	7.77e-05
Bcl2a1b	22.1251	0.441253	0.0859691	5.13269	2.86e-07	1.87e-05
Naip5	60.0144	0.440402	0.0916384	4.80587	1.54e-06	8.29e-05
Col27a1	702.406	0.440054	0.0749129	5.87421	4.25e-09	4.03e-07
Lyn	201.472	0.439534	0.0801066	5.48686	4.09e-08	3.14e-06
Csf2rb2	39.8111	0.439084	0.0909162	4.82955	1.37e-06	7.44e-05
Gfap	56289.5	0.436406	0.0908255	4.80488	1.55e-06	8.31e-05
Pdlim4	250.918	0.435501	0.0776334	5.60971	2.03e-08	1.63e-06
Ly9	22.9254	0.430996	0.0849167	5.07551	3.86e-07	2.42e-05
Fgf21	12.2514	0.430449	0.065702	6.55155	5.69e-11	8.11e-09
Tgfbr1	949.196	0.429835	0.0521552	8.24147	1.7e-16	4.68e-14
Spint1	37.6634	0.429741	0.0899714	4.77642	1.78e-06	9.42e-05
Tbxas1	85.4201	0.427974	0.090399	4.73428	2.2e-06	0.000114579
Rac2	87.7291	0.426957	0.0909533	4.69424	2.68e-06	0.000136038
Fcgr1	88.7467	0.426717	0.0891125	4.78851	1.68e-06	8.93e-05
Tnfrsf1a	568.17	0.424833	0.0598416	7.09929	1.25e-12	2.35e-10
Mki67	66.8478	0.424089	0.0868294	4.88416	1.04e-06	5.8e-05
Unc93b1	477.353	0.424007	0.0671772	6.31177	2.76e-10	3.46e-08
Cd37	97.938	0.421537	0.087203	4.83398	1.34e-06	7.3e-05
Arhgap30	129.791	0.421118	0.0834534	5.04614	4.51e-07	2.8e-05
Sulf1	533.441	0.417711	0.0633186	6.59697	4.2e-11	6.19e-09
Ccn5	23.2481	0.417178	0.0709319	5.88139	4.07e-09	3.91e-07
Ctsl	2671.5	0.416241	0.041751	9.96959	2.07e-23	8.77e-21
Fabp7	743.646	0.414652	0.0740923	5.59642	2.19e-08	1.75e-06
Fmo1	122.567	0.413524	0.091743	4.50742	6.56e-06	0.000301161
Gusb	555.814	0.413402	0.0545549	7.57773	3.52e-14	7.75e-12
Clic1	279.667	0.41271	0.08447	4.88588	1.03e-06	5.77e-05
Lgals3bp	810.596	0.412671	0.0719038	5.7392	9.51e-09	8.5e-07
Cd33	143.4	0.410592	0.0859402	4.77764	1.77e-06	9.39e-05
Palld	326.225	0.41043	0.0731034	5.61438	1.97e-08	1.6e-06
Tgm1	17.0055	0.409872	0.0740035	5.53855	3.05e-08	2.37e-06
Cxcl16	94.9249	0.405249	0.091224	4.44235	8.9e-06	0.000389966
Fblim1	81.8292	0.404294	0.0915678	4.41524	1.01e-05	0.000435253
Pcdhgc5	295.114	0.403712	0.0870754	4.63635	3.55e-06	0.00017283
Pycard	61.6842	0.402432	0.0920006	4.37423	1.22e-05	0.000507655
Xpo1	2578.09	0.40032	0.0494337	8.09812	5.58e-16	1.49e-13
Hpgds	162.402	0.399175	0.0825265	4.83692	1.32e-06	7.21e-05
Ednrb	2351.19	0.397057	0.0692261	5.73565	9.71e-09	8.58e-07
Npnt	167.582	0.396523	0.0842336	4.70742	2.51e-06	0.000129934
Car5b	222.51	0.3963	0.0832642	4.75955	1.94e-06	0.00010177
Sel1l3	981.892	0.395875	0.046548	8.50466	1.82e-17	5.57e-15
Pik3cg	112.264	0.395091	0.0863614	4.57485	4.77e-06	0.000227564
Apbb1ip	175.696	0.391429	0.088791	4.40843	1.04e-05	0.000445669
Ccdc190	408.236	0.389782	0.0737432	5.28567	1.25e-07	8.96e-06
Lair1	268.336	0.389359	0.0680621	5.72064	1.06e-08	9.33e-07
Cd48	22.4025	0.389094	0.0827162	4.70396	2.55e-06	0.000131741
C5ar1	24.228	0.388817	0.0872467	4.45653	8.33e-06	0.00036896
Iqgap3	25.714	0.385546	0.0829809	4.6462	3.38e-06	0.000166752
Parvg	94.0164	0.381952	0.0916105	4.1693	3.06e-05	0.00113952
Glipr2	265.972	0.37843	0.083017	4.55846	5.15e-06	0.000243945
Met	177.425	0.377689	0.0827749	4.56284	5.05e-06	0.000239601
S100a11	123.64	0.376137	0.0922113	4.07908	4.52e-05	0.00160307
P4ha3	457.329	0.374558	0.0773554	4.84204	1.29e-06	7.05e-05
Plcg2	191.597	0.373617	0.0747215	5.00013	5.73e-07	3.44e-05
B4galt1	171.401	0.372173	0.0831007	4.47858	7.51e-06	0.000335534
Apobec1	83.3479	0.372131	0.0920746	4.04162	5.31e-05	0.00182749
Mlxipl	141.353	0.371724	0.0849581	4.37538	1.21e-05	0.000507044
Il10ra	210.326	0.370487	0.0803104	4.61319	3.97e-06	0.000191011
Ms4a6c	26.2698	0.369844	0.0832978	4.44002	9e-06	0.000393163
Fes	149.864	0.369449	0.0839902	4.39871	1.09e-05	0.000462508
Tec	93.4865	0.369322	0.0923556	3.99891	6.36e-05	0.00212399
F11r	278.097	0.368881	0.0698932	5.27779	1.31e-07	9.27e-06
Ch25h	24.8158	0.368491	0.0784273	4.69851	2.62e-06	0.000134467
Syk	128.523	0.368077	0.0912124	4.03538	5.45e-05	0.00186477
Fermt3	180.517	0.36655	0.0817065	4.48618	7.25e-06	0.000327338
Lsp1	104.745	0.36507	0.0908179	4.0198	5.82e-05	0.00198018
Prss23	202.972	0.364582	0.0859683	4.24089	2.23e-05	0.000861463
Slc5a3	1128.99	0.364105	0.0551818	6.59827	4.16e-11	6.19e-09
Slc43a3	45.3293	0.362563	0.0861958	4.20627	2.6e-05	0.000983025
Trib1	227.728	0.361899	0.0826633	4.37799	1.2e-05	0.00050228
Gpr183	31.7137	0.361609	0.0893273	4.04813	5.16e-05	0.00178452
Tlr1	25.1174	0.361183	0.0837287	4.31373	1.61e-05	0.000645294
Plin2	429.57	0.360626	0.0708869	5.08734	3.63e-07	2.31e-05
Zmynd15	46.9066	0.358726	0.0920597	3.89666	9.75e-05	0.00300625
C3	2967.72	0.357709	0.08943	3.99988	6.34e-05	0.0021238
Mdfic	90.2279	0.35768	0.089869	3.98001	6.89e-05	0.00226353
Csf1	1580.02	0.355093	0.0589073	6.028	1.66e-09	1.76e-07
Tnfrsf1b	185.743	0.35492	0.0766266	4.63181	3.62e-06	0.000176142
Ifi204	20.266	0.35475	0.0798124	4.4448	8.8e-06	0.000387596
Sbno2	781.616	0.353095	0.0703113	5.02187	5.12e-07	3.11e-05
Klhl6	82.4184	0.352598	0.0914159	3.85708	0.000114752	0.00342226
Stat6	292.177	0.351014	0.0811123	4.3275	1.51e-05	0.000612208
Renbp	123.677	0.350328	0.0915873	3.82507	0.000130737	0.00380288
Golm1	521.976	0.349915	0.0561412	6.23278	4.58e-10	5.49e-08
Ecm1	176.568	0.349574	0.0907649	3.85142	0.000117435	0.00348342
Ptgs1	339.048	0.349512	0.0832899	4.19633	2.71e-05	0.00102235
Gcnt1	74.551	0.349098	0.0909354	3.83897	0.000123552	0.00363225
Sgpl1	1193.85	0.348879	0.0414307	8.42079	3.74e-17	1.12e-14
Sspo	269.411	0.347852	0.0910459	3.82062	0.000133116	0.00385849
Clcf1	63.0089	0.347531	0.0923423	3.76351	0.000167546	0.00466811
Sh3bp2	204.092	0.347407	0.0860196	4.0387	5.37e-05	0.00184237
Gpr34	226.572	0.345949	0.0797645	4.33713	1.44e-05	0.000591816
Hbegf	449.968	0.34483	0.074777	4.61144	4e-06	0.000191559
Mylk	451.004	0.344691	0.0845486	4.07684	4.57e-05	0.00161168
Rab29	156.728	0.344333	0.0839885	4.09976	4.14e-05	0.00148544
Mvp	455.002	0.343942	0.070548	4.87529	1.09e-06	6.04e-05
Tnfrsf11b	93.3277	0.343701	0.0920577	3.73354	0.000188806	0.00515612
Hcar2	9.8253	0.343425	0.0685558	5.00942	5.46e-07	3.3e-05
Gch1	82.4325	0.342686	0.0912204	3.75669	0.000172177	0.00477301
Igsf1	453.096	0.342408	0.0912333	3.7531	0.00017466	0.00483372
Sp110	45.6616	0.342266	0.092331	3.70694	0.000209775	0.00559016
Tcirg1	668.754	0.342203	0.0547709	6.2479	4.16e-10	5.02e-08
B2m	2300.5	0.341601	0.0545335	6.26406	3.75e-10	4.56e-08
Serinc2	45.0865	0.341586	0.092031	3.71164	0.00020592	0.00554105
Itgb5	1804.45	0.341023	0.0473988	7.19477	6.26e-13	1.22e-10
Clu	17680.8	0.340458	0.0407473	8.35536	6.52e-17	1.92e-14
Dnase2a	121.002	0.340181	0.0822543	4.13573	3.54e-05	0.00129911
Tspo	126.101	0.340126	0.088295	3.85216	0.000117081	0.00347916
Apobr	45.7938	0.338542	0.0921824	3.67253	0.000240161	0.00623889
Itpripl2	282.814	0.336506	0.0844752	3.98349	6.79e-05	0.00224855
Fam102b	731.593	0.335687	0.0663262	5.06115	4.17e-07	2.6e-05
Steap3	158.278	0.335015	0.0868248	3.85852	0.000114078	0.0034083
Man2b1	1433.04	0.3348	0.0438004	7.64376	2.11e-14	4.71e-12
Nnat	2054.01	0.334759	0.0787047	4.25335	2.11e-05	0.00082256
Arhgef5	103.986	0.334599	0.0921876	3.62955	0.000283917	0.0071726
Fam129a	169.479	0.334511	0.092196	3.62826	0.000285341	0.00719758
Tead1	758.807	0.333069	0.0585156	5.69198	1.26e-08	1.09e-06
Fgfr4	26.919	0.332082	0.0796966	4.16683	3.09e-05	0.00114933
Ccr5	116.696	0.331917	0.0855285	3.88078	0.000104124	0.0031799
Themis2	39.0815	0.331827	0.0919835	3.60746	0.00030921	0.00769393
Treml2	14.3496	0.331779	0.0752162	4.41101	1.03e-05	0.000442693
Myom1	78.7091	0.330725	0.0900395	3.67311	0.000239619	0.00623562
Irf9	351.051	0.330209	0.0687861	4.80052	1.58e-06	8.46e-05
Tmem119	479.967	0.32972	0.0695349	4.74179	2.12e-06	0.000110757
Ltbr	340.215	0.32891	0.0727592	4.52052	6.17e-06	0.000285779
Trim14	36.8812	0.328827	0.091806	3.58176	0.000341286	0.00824374
Rcsd1	188.149	0.328737	0.0838842	3.91894	8.89e-05	0.00278833
Lpxn	35.7398	0.327836	0.0907419	3.61284	0.000302865	0.00759323
Hexa	1390.17	0.32588	0.0480715	6.77908	1.21e-11	2.02e-09
Cd34	735.786	0.325453	0.066491	4.89469	9.85e-07	5.53e-05
Havcr2	106.685	0.324773	0.0906201	3.5839	0.000338507	0.00821266
Plaur	20.9863	0.324265	0.0809149	4.00748	6.14e-05	0.00207779
Rnase4	328.546	0.323954	0.0764476	4.23759	2.26e-05	0.000869587
Selplg	745.471	0.323244	0.061932	5.21934	1.8e-07	1.25e-05
Slco2b1	702.374	0.322999	0.0695013	4.64738	3.36e-06	0.000166752
Sugct	90.064	0.322868	0.0884624	3.64978	0.000262469	0.00672328
Aqp4	16064.3	0.320825	0.0595532	5.3872	7.16e-08	5.3e-06
Tmc3	106.587	0.317642	0.0897474	3.53928	0.000401214	0.0094151
Thbs2	757.32	0.317424	0.082671	3.83961	0.00012323	0.00362925
Cebpa	205.324	0.317235	0.0869665	3.64779	0.000264507	0.006765
Gm45916	353.738	0.316955	0.0704343	4.50001	6.8e-06	0.000308431
Sting1	110.577	0.316893	0.0857988	3.69344	0.000221241	0.00583921
Ticam2	22.1695	0.316163	0.0814879	3.87988	0.000104508	0.00318575
Arl11	18.4162	0.316047	0.0784348	4.02943	5.59e-05	0.00190864
Ccdc162	121.475	0.315604	0.0882096	3.57788	0.000346386	0.0083304
Cyp4v3	247.424	0.315037	0.0727125	4.33264	1.47e-05	0.000599567
Tlr4	53.7528	0.314775	0.092302	3.41027	0.000648983	0.0138598
Cdsn	27.8465	0.31422	0.0824165	3.81258	0.000137522	0.00396534
Slc39a14	1187.41	0.313818	0.0522559	6.00541	1.91e-09	1.98e-07
Kcnk6	95.8993	0.313767	0.0901227	3.48155	0.000498513	0.0111756
Mmp19	192.965	0.313756	0.0850485	3.68914	0.00022501	0.00592425
Plscr2	107.248	0.313348	0.0889418	3.52307	0.000426577	0.00987101
Lix1	341.227	0.313186	0.0870291	3.59864	0.000319886	0.00787654
Rab32	58.2193	0.312514	0.091926	3.39963	0.000674773	0.0142348
Lpar5	21.0596	0.312263	0.0824649	3.78662	0.000152713	0.00432043
Grm2	126.491	0.312185	0.0902802	3.45796	0.000544278	0.0120705
Ncf2	142.043	0.312115	0.0871151	3.58279	0.000339945	0.00823544
Il1rn	6.90776	0.31141	0.0606706	5.1328	2.85e-07	1.87e-05
Ptafr	44.7863	0.310971	0.0923029	3.36903	0.000754344	0.0155596
Gfpt2	120.819	0.310275	0.0868437	3.5728	0.000353186	0.0084693
Endou	45.331	0.309403	0.0913197	3.38813	0.000703707	0.0146247
Il13ra1	187.47	0.308923	0.0782914	3.9458	7.95e-05	0.0025466
Il21r	57.9745	0.30889	0.0908674	3.39935	0.000675468	0.0142348
Myof	165.825	0.307658	0.0918201	3.35066	0.000806198	0.0165261
Lrrk1	182.022	0.307369	0.0886362	3.46776	0.000524812	0.0117175
Trim47	109.722	0.307251	0.0881715	3.48469	0.000492703	0.0111056
Tgfb1	141.485	0.307202	0.0825824	3.71995	0.000199266	0.00539289
Ccdc88b	171.973	0.307199	0.0801651	3.83208	0.000127066	0.00370261
Prelp	955.065	0.306401	0.076485	4.00603	6.17e-05	0.00208492
Milr1	33.8449	0.306393	0.0902671	3.3943	0.000688047	0.0144263
Itih5	2273.38	0.306291	0.0709391	4.31766	1.58e-05	0.000635463
Gmip	294.248	0.304908	0.0779453	3.91182	9.16e-05	0.00285017
Slc39a1	860.743	0.304476	0.0519058	5.86594	4.47e-09	4.22e-07
Slc7a8	551.274	0.304195	0.0541065	5.62215	1.89e-08	1.55e-06
S100a10	689.563	0.304138	0.066558	4.56952	4.89e-06	0.000232751
Ehd2	297.406	0.303989	0.0890975	3.41186	0.000645201	0.0138262
Adamtsl3	118.805	0.303891	0.0921448	3.29797	0.000973876	0.019087
Rhoc	380.23	0.303378	0.0707463	4.28825	1.8e-05	0.000715233
Ifi207	14.9503	0.303093	0.0761081	3.9824	6.82e-05	0.00224956
Slc16a6	806.454	0.302323	0.05796	5.21607	1.83e-07	1.26e-05
Rasl11a	35.3919	0.302203	0.090856	3.32617	0.00088048	0.017784
Cdk6	91.6509	0.301923	0.092122	3.27743	0.00104758	0.0201962
Cmtm7	49.9602	0.301799	0.0918391	3.28617	0.0010156	0.0197177
Pdcd1	10.397	0.301128	0.0643204	4.68168	2.85e-06	0.000143325
St8sia2	175.705	0.301074	0.0871203	3.45585	0.000548566	0.0121347
Nfam1	78.6434	0.300732	0.0906405	3.31786	0.000907106	0.0181663
Glis3	107.475	0.299846	0.0905138	3.31271	0.000923969	0.0184518
Prdx6	7155.16	0.299793	0.050161	5.97662	2.28e-09	2.34e-07
Arhgap4	156.275	0.299747	0.0865689	3.46253	0.000535123	0.0119155
Bst2	98.0974	0.298728	0.0921964	3.24012	0.00119479	0.0223054
Fxyd1	1033.8	0.296862	0.0685139	4.33287	1.47e-05	0.000599567
Rims4	267.955	0.296407	0.0914506	3.24117	0.00119039	0.0222736
Zfp185	35.5138	0.296345	0.0873868	3.39119	0.000695893	0.0145539
Axl	2149.21	0.295364	0.0454769	6.49482	8.31e-11	1.15e-08
Fgd2	143.857	0.294053	0.0844704	3.48114	0.000499292	0.0111779
Gna15	51.377	0.293933	0.0922195	3.18732	0.00143599	0.0257885
Masp1	491.1	0.293199	0.0628118	4.6679	3.04e-06	0.000151888
Ecel1	1176.24	0.291264	0.0645563	4.51178	6.43e-06	0.000296678
Stab1	494.99	0.290606	0.0841188	3.45471	0.000550889	0.0121682
Gpx8	94.6751	0.290533	0.0923274	3.14677	0.00165083	0.0282642
Adap2	159.634	0.289902	0.082206	3.52653	0.000421036	0.00979608
Shisal1	841.737	0.289684	0.0712655	4.06486	4.81e-05	0.00168952
Rgs1	9.06102	0.289317	0.0611942	4.72785	2.27e-06	0.000117896
Rnf122	245.595	0.286827	0.0773249	3.70937	0.000207774	0.00556843
Ftl1	5286.1	0.286477	0.0454624	6.30141	2.95e-10	3.66e-08
Plxnb2	2000.24	0.285968	0.0609548	4.69147	2.71e-06	0.000137053
Erbin	4530.61	0.285931	0.0426978	6.69662	2.13e-11	3.42e-09
Abca1	1331.33	0.28584	0.0632346	4.52031	6.17e-06	0.000285779
Synpo	643.959	0.285351	0.0633903	4.50149	6.75e-06	0.000307136
Rhoj	204.933	0.284907	0.0869637	3.27616	0.00105229	0.0202398
Acrbp	204.304	0.284443	0.0839096	3.38987	0.00069925	0.0145889
Lrrc3	195.329	0.284046	0.0838641	3.38697	0.000706681	0.0146497
Cchcr1	236.603	0.283631	0.0756863	3.74746	0.000178634	0.0049272
Mcm5	107.449	0.282967	0.0908602	3.11431	0.00184374	0.03077
Trim25	288.137	0.2826	0.0660702	4.27726	1.89e-05	0.000749654
Marcks	2047.16	0.281914	0.0659261	4.27621	1.9e-05	0.000751051
Neto2	951.969	0.281657	0.0677193	4.15919	3.19e-05	0.00117786
Ddr2	265.775	0.281426	0.0920093	3.05866	0.00222326	0.0352183
Ncf4	29.5518	0.281226	0.0871774	3.2259	0.00125577	0.0231587
Galnt15	331.358	0.280911	0.0891374	3.15143	0.0016247	0.0281058
Il6ra	122.653	0.280887	0.0865717	3.24456	0.00117634	0.0220798
Kank2	454.872	0.280801	0.0795782	3.52862	0.000417732	0.00974825
Fosl2	226.67	0.280537	0.0763769	3.67307	0.000239657	0.00623562
Slc13a3	761.853	0.280276	0.0838114	3.34413	0.00082541	0.016878
Gcnt2	306.926	0.280254	0.0887457	3.15794	0.00158888	0.02775
Bmp4	64.3582	0.279181	0.0899442	3.10394	0.00190964	0.0315826
Fbln2	157.707	0.2787	0.091202	3.05586	0.00224416	0.0354813
Lars2	1706.02	0.27805	0.0781121	3.55963	0.000371381	0.00884142
Cxcl10	25.096	0.277991	0.084369	3.29495	0.000984408	0.0192478
Mrps6	410.915	0.277386	0.0655093	4.2343	2.29e-05	0.00087887
Kctd11	102.169	0.2765	0.0865747	3.19378	0.00140425	0.0253286
Gfm2	1444.96	0.276112	0.0523616	5.27317	1.34e-07	9.47e-06
Casp1	53.8575	0.275796	0.092159	2.99261	0.00276605	0.0418504
Cybrd1	109.818	0.275666	0.0921117	2.99274	0.00276487	0.0418504
Plcb2	96.267	0.275137	0.0904925	3.04044	0.00236235	0.0369609
Ctsb	18714	0.275035	0.0235552	11.6762	1.69e-31	1.86e-28
Cnn3	3973.55	0.274585	0.0619875	4.42968	9.44e-06	0.00041033
Fgr	26.7937	0.274497	0.0876155	3.13298	0.00173043	0.0293232
Dna2	89.0109	0.274172	0.0896792	3.05726	0.00223373	0.0353502
Wdfy4	101.284	0.273886	0.0899958	3.04332	0.00233983	0.0366433
Was	41.8284	0.273002	0.0910043	2.99988	0.00270088	0.0409393
Nfya	431.104	0.272697	0.0642263	4.24588	2.18e-05	0.000846474
Naprt	210.027	0.272463	0.0737175	3.69604	0.000218987	0.00581658
Btk	42.8923	0.272411	0.0901182	3.02282	0.00250432	0.0387419
Tiam2	219.504	0.272283	0.075441	3.60922	0.000307123	0.00767154
Col5a3	590.174	0.271577	0.0853015	3.18373	0.00145391	0.0259973
Pla2g15	393.419	0.271416	0.0613987	4.42055	9.85e-06	0.000425816
Ildr2	1140.45	0.270271	0.0521921	5.17839	2.24e-07	1.52e-05
Smoc1	431.021	0.270266	0.0891097	3.03296	0.00242166	0.0376748
Neurl1b	47.7545	0.270112	0.0905217	2.98395	0.00284557	0.0425086
Mcm3	114.8	0.269995	0.0845239	3.1943	0.00140168	0.02531
Sla	79.8134	0.269961	0.0913353	2.95572	0.00311942	0.0456906
Bub1b	130.955	0.2697	0.0920667	2.92939	0.00339625	0.0486246
Dhrs3	258.415	0.268993	0.0750932	3.58212	0.000340823	0.00824374
Efemp2	413.121	0.268902	0.0693214	3.87907	0.000104858	0.00319055
Vamp8	200.989	0.268753	0.0787046	3.41471	0.000638511	0.0137126
Adgrg2	110.14	0.268526	0.0908316	2.95631	0.00311346	0.0456438
Slamf8	11.2563	0.268295	0.0720024	3.7262	0.000194388	0.00529107
Dab2	385.794	0.268149	0.0880048	3.04698	0.00231151	0.0363029
Rnft1	269.043	0.267816	0.07154	3.74358	0.000181414	0.00497068
Ppp1r18	288.787	0.26762	0.0683569	3.91505	9.04e-05	0.00282836
Gpr179	187.824	0.267155	0.0895188	2.98434	0.0028419	0.0424921
Ms4a6d	22.788	0.266492	0.0851376	3.13014	0.00174724	0.0295173
Ifit3	267.144	0.266252	0.0905504	2.94037	0.00327822	0.04737
Dock7	1148.88	0.266172	0.0608736	4.37254	1.23e-05	0.000508525
Skap2	631.122	0.26606	0.0646379	4.11617	3.85e-05	0.00139577
Fxyd5	196.254	0.264513	0.083898	3.1528	0.00161715	0.0281058
St14	37.3565	0.263543	0.0902803	2.91916	0.00350971	0.0496043
Prrx2	24.765	0.26268	0.0808778	3.24786	0.00116275	0.0219304
St6galnac5	152.326	0.262352	0.082719	3.17161	0.00151598	0.0268457
Tgif2	138.807	0.261802	0.0871476	3.00413	0.00266346	0.0405209
Lrrc75a	199.763	0.261285	0.0775784	3.36801	0.000757122	0.0155975
Fam129b	1326.19	0.260973	0.0596675	4.37379	1.22e-05	0.000507655
Gbp2	167.776	0.260036	0.0885814	2.93556	0.0033295	0.0479182
Ppp1r1a	326.594	0.259635	0.0876863	2.96095	0.00306687	0.0451209
Slc44a3	22.0117	0.259094	0.0819411	3.16196	0.00156711	0.0275153
Mustn1	32.1707	0.258838	0.08193	3.15925	0.00158175	0.0276546
Stom	302.738	0.258402	0.0793859	3.255	0.00113391	0.0215338
Kcnn3	412.289	0.258128	0.0710454	3.63328	0.000279842	0.00708049
Atp13a5	382.101	0.257184	0.0744549	3.45423	0.000551873	0.0121736
Hmgn1	967.137	0.256455	0.0568678	4.50967	6.49e-06	0.00029882
Srl	190.944	0.256339	0.0808136	3.17198	0.00151405	0.0268403
Dusp27	11.5927	0.255459	0.0694609	3.67774	0.000235312	0.00616138
Klf6	716.98	0.25448	0.0640256	3.97466	7.05e-05	0.00230576
Zc3hav1	296.786	0.254207	0.067656	3.75735	0.000171722	0.00476839
Flna	2979.3	0.253757	0.0736692	3.44455	0.00057202	0.0124847
Amotl1	1930.6	0.253667	0.0596295	4.25405	2.1e-05	0.000821945
Pld2	917.471	0.25305	0.0489499	5.16957	2.35e-07	1.56e-05
Vsir	1045.06	0.252227	0.0539072	4.67891	2.88e-06	0.000144831
Tm4sf1	300.599	0.251722	0.079051	3.1843	0.00145104	0.0259866
Tmem198b	388.724	0.25079	0.0756247	3.31625	0.000912347	0.0182491
Hs3st3b1	155.478	0.250472	0.0781083	3.20672	0.00134257	0.024349
Cmtm6	879.205	0.250168	0.0592658	4.22112	2.43e-05	0.000925432
Nectin2	168.841	0.250086	0.0814308	3.07115	0.00213239	0.0342052
Pclaf	14.0742	0.249779	0.0731531	3.41447	0.00063907	0.0137126
Pros1	612.412	0.249639	0.0568453	4.39155	1.13e-05	0.000475561
Parp3	338.28	0.249578	0.0813543	3.06779	0.00215651	0.0344917
Slc1a3	3958.71	0.248825	0.0722672	3.44312	0.00057504	0.0125341
Tmem100	375.12	0.248787	0.0756647	3.28802	0.00100895	0.0196579
Adcy7	789.739	0.248372	0.0512306	4.84813	1.25e-06	6.86e-05
Ptbp1	844.885	0.248203	0.0630902	3.93409	8.35e-05	0.00263823
Pald1	611.421	0.247907	0.0666465	3.71973	0.000199434	0.00539289
Entpd2	429.386	0.24769	0.0821436	3.01533	0.00256701	0.0393434
Apoe	32922.9	0.247523	0.0478241	5.1757	2.27e-07	1.52e-05
Mafb	344.857	0.247412	0.0742531	3.33201	0.000862217	0.0175007
Atp7b	177.859	0.244774	0.0777546	3.14803	0.00164373	0.0282012
Prkcd	621.957	0.244501	0.0750731	3.25684	0.0011266	0.0214444
Ccnd2	742.117	0.244213	0.0760047	3.21313	0.00131297	0.0239496
Hspb6	297.966	0.243679	0.0809048	3.01192	0.00259604	0.0397146
Gabra4	398.337	0.243676	0.0662661	3.67724	0.000235776	0.00616374
Ptk2b	224.734	0.241903	0.0797075	3.03488	0.00240628	0.0374708
Alpk1	190.693	0.241563	0.0827065	2.92073	0.00349216	0.0494528
Klhdc8b	390.371	0.240568	0.0738805	3.25617	0.00112925	0.02147
Ccnb2	16.507	0.240172	0.079867	3.00715	0.00263707	0.0401935
Galnt4	223.956	0.239814	0.0732105	3.27567	0.00105411	0.0202513
Il6st	4049.86	0.239088	0.0546678	4.37347	1.22e-05	0.000507655
AI504432	432.407	0.238137	0.0771761	3.08564	0.00203116	0.0329978
Cd72	144.278	0.238131	0.0808823	2.94417	0.0032382	0.0469724
Mtmr11	443.19	0.237833	0.0678522	3.50516	0.000456335	0.0103994
Ntrk1	37.273	0.237693	0.0729815	3.2569	0.00112637	0.0214444
Sh2d4a	11.5157	0.237187	0.0699873	3.38901	0.000701463	0.0145964
Slc16a9	171.944	0.236862	0.0788893	3.00247	0.00267801	0.0407048
Knl1	12.7013	0.236799	0.074192	3.19171	0.00141434	0.0254273
Cacnb3	911.06	0.236553	0.0749638	3.15556	0.00160188	0.0279181
Syt1	5255.37	0.236046	0.0731542	3.22669	0.0012523	0.0231587
Irf5	305.449	0.235384	0.0682519	3.44875	0.000563198	0.0123411
Lcat	836.291	0.234836	0.0650228	3.6116	0.000304317	0.00761808
Flvcr1	564.313	0.233952	0.0567793	4.12038	3.78e-05	0.00137351
Rgs20	223.113	0.233932	0.0785668	2.97749	0.00290622	0.0432192
Ecm2	280.312	0.233831	0.0790364	2.95852	0.00309123	0.0454389
Tgfbr2	694.202	0.233197	0.0703993	3.31249	0.00092471	0.0184518
Bmp2k	934.149	0.232914	0.0499812	4.66002	3.16e-06	0.000157343
Ngfr	156.349	0.232841	0.0773652	3.00963	0.00261565	0.0399038
Serpinf2	8.3612	0.231605	0.0551963	4.19602	2.72e-05	0.00102235
Sik1	315.368	0.231518	0.0709281	3.26412	0.00109804	0.0209976
Siglech	283.505	0.230874	0.0743624	3.10471	0.00190465	0.0315316
Kctd12	1473.92	0.227928	0.0556861	4.09308	4.26e-05	0.00152233
Gpam	3281.29	0.227653	0.0419631	5.42507	5.79e-08	4.33e-06
Xirp1	10.0372	0.227003	0.0628993	3.609	0.000307382	0.00767154
Siglec1	26.5163	0.226324	0.0749459	3.01984	0.00252911	0.0389432
Ptpn7	7.69956	0.225822	0.0638108	3.53893	0.000401746	0.0094151
Naglu	268.07	0.225797	0.072681	3.10669	0.00189198	0.0313734
Msn	2645.82	0.225318	0.0715883	3.14742	0.0016472	0.0282314
Plat	1161.3	0.224768	0.0762178	2.94903	0.00318777	0.046363
Mob1a	334.931	0.224105	0.0623645	3.59347	0.000326304	0.00798695
Zc3h12c	460.531	0.22371	0.0612571	3.652	0.000260211	0.00667578
Chdh	335.958	0.22371	0.0718519	3.11349	0.00184887	0.0308244
Dock6	714.087	0.223151	0.0763839	2.92144	0.00348414	0.0494528
Herc6	195.057	0.22258	0.0759361	2.93114	0.00337719	0.0484357
Odc1	2348.38	0.222026	0.0495053	4.4849	7.29e-06	0.000328406
9930111J21Rik1	13.4705	0.221183	0.0757243	2.92089	0.00349028	0.0494528
1700017B05Rik	330.889	0.221022	0.0718237	3.07729	0.00208895	0.03387
Prss30	15.8978	0.220155	0.0682466	3.22587	0.00125591	0.0231587
Afap1l2	316.453	0.219444	0.0750318	2.92467	0.00344818	0.0490705
Lonrf3	600.949	0.219019	0.0605618	3.61646	0.000298656	0.00749907
Iqgap1	854.086	0.216091	0.05664	3.81516	0.000136094	0.00393101
Stat3	2436.12	0.215374	0.0440011	4.89474	9.84e-07	5.53e-05
Pbk	12.8561	0.215045	0.0696259	3.08857	0.0020112	0.0327702
Parvb	751.431	0.214845	0.0609191	3.52673	0.000420725	0.00979608
Erlin1	330.984	0.214528	0.0678154	3.16341	0.00155933	0.0274731
Tpm4	1015.41	0.213324	0.0704522	3.02792	0.00246244	0.0382013
Als2cl	1188.64	0.213064	0.0690061	3.08761	0.00201774	0.0328445
Chl1	2692.2	0.212934	0.0533515	3.99115	6.58e-05	0.00218585
Tspan4	387.253	0.212856	0.0624805	3.40675	0.000657408	0.0139611
Ccl12	10.7839	0.212376	0.068433	3.10341	0.00191305	0.0316074
Mmgt2	348.817	0.21193	0.0601807	3.52157	0.000429005	0.00991331
Arsb	2184.32	0.211782	0.0453513	4.66981	3.01e-06	0.00015094
Fnip2	475.346	0.211598	0.0557027	3.7987	0.000145455	0.00414346
Pcdhgc3	1356.46	0.210665	0.0454013	4.64008	3.48e-06	0.00017075
Idh2	710.678	0.21063	0.0575131	3.6623	0.000249961	0.006463
Fzd1	519.314	0.210506	0.0671192	3.1363	0.00171097	0.029053
Tjp1	3496.58	0.210308	0.0392442	5.35895	8.37e-08	6.15e-06
Fkbp9	1013.21	0.210297	0.0593447	3.54365	0.000394625	0.00928774
Pbxip1	2994.38	0.209597	0.0401965	5.21431	1.85e-07	1.27e-05
Ampd3	1043.47	0.20932	0.0425638	4.9178	8.75e-07	4.99e-05
Rasa4	317.767	0.20904	0.0703996	2.96933	0.00298448	0.0441447
Gpr65	11.7236	0.208633	0.0706361	2.95364	0.00314051	0.0459181
Arl4a	395.469	0.203915	0.0674958	3.02115	0.00251816	0.0388107
Ddit3	459.698	0.20223	0.0608147	3.32534	0.000883099	0.0177934
Pan3	651.034	0.201856	0.0543641	3.71305	0.000204777	0.00551931
Cav2	821.937	0.201213	0.0656697	3.06401	0.00218391	0.0347616
Zfp281	837.17	0.199157	0.0548022	3.6341	0.000278957	0.00706891
Tab2	1688.9	0.198981	0.0395518	5.03091	4.88e-07	2.99e-05
Ndst1	3379.19	0.198059	0.0392733	5.0431	4.58e-07	2.83e-05
Cttnbp2nl	1132.9	0.197148	0.055956	3.52328	0.000426249	0.00987101
Lmo2	378.914	0.197074	0.0663505	2.97019	0.00297618	0.0440613
Zfp90	380.743	0.19668	0.0628913	3.12731	0.00176417	0.0297424
Galnt6	1592.53	0.196227	0.0546603	3.58993	0.000330761	0.00804835
Tspan6	407.285	0.194887	0.0624328	3.12155	0.00179901	0.0302374
Inppl1	1169.23	0.194663	0.052484	3.709	0.000208081	0.00556843
Luzp2	2800.73	0.194456	0.0493281	3.9421	8.08e-05	0.00257628
Necap2	966.872	0.194372	0.0522011	3.72351	0.000196471	0.00533898
Slc12a4	846.644	0.193864	0.0568492	3.41014	0.000649287	0.0138598
Hvcn1	411.381	0.193607	0.0622792	3.10869	0.00187916	0.0312035
Nfe2l2	781.604	0.193561	0.0606384	3.19206	0.00141264	0.0254245
Agtrap	540.822	0.193511	0.0544003	3.55716	0.000374889	0.00888655
Srgap1	1142.11	0.1933	0.0464028	4.1657	3.1e-05	0.00115061
Syngr2	476.955	0.192508	0.0617655	3.11675	0.00182855	0.0305783
Sgcg	13.3739	0.192205	0.0645071	2.9796	0.00288624	0.0430383
Suclg2	631.146	0.191954	0.0489003	3.92542	8.66e-05	0.00272464
Tmsb4x	9630.74	0.189977	0.060294	3.15085	0.00162797	0.0281058
Hmgn2	1016.83	0.188929	0.0567454	3.32941	0.000870298	0.017643
D2hgdh	291.239	0.188419	0.0645899	2.91716	0.00353239	0.0498396
Cotl1	1676.71	0.187195	0.039821	4.70092	2.59e-06	0.000133306
Clk1	2077.54	0.187093	0.06086	3.07415	0.00211105	0.0339608
Elmsan1	714.495	0.186952	0.0519765	3.59687	0.000322074	0.0079186
Lgi4	1693.06	0.186534	0.0528115	3.53208	0.000412309	0.00963531
Cd300lb	8.17103	0.185831	0.0552299	3.36469	0.000766304	0.015767
0610030E20Rik	592.179	0.185726	0.0578034	3.21306	0.0013133	0.0239496
Mef2c	519.015	0.184687	0.0595915	3.09923	0.00194028	0.0319295
Slc44a2	1426.86	0.184178	0.0411111	4.48001	7.46e-06	0.000334319
Rgma	1537.08	0.183964	0.0478815	3.84206	0.000122005	0.00359957
Peg10	1952.85	0.183652	0.0607865	3.02126	0.00251727	0.0388107
Shisa5	897.5	0.182256	0.0523353	3.48246	0.000496825	0.0111681
Slc22a4	724.672	0.18205	0.0476279	3.82234	0.000132193	0.00383849
Morc3	635.961	0.179851	0.0506408	3.5515	0.000383041	0.00904086
Tmed3	627.319	0.179813	0.0551317	3.26151	0.0011082	0.0211672
Septin11	1017.29	0.179604	0.0479737	3.74379	0.000181262	0.00497068
Gls	4554.53	0.179463	0.0588521	3.04939	0.00229306	0.0360818
Arhgef26	1244.48	0.179458	0.0550473	3.26007	0.00111386	0.0212508
Cd151	1041.67	0.178899	0.0536261	3.33604	0.000849817	0.0172915
Ifnar2	418.718	0.177868	0.0595168	2.98854	0.00280316	0.0421034
Tcn2	746.935	0.17776	0.0548571	3.24042	0.00119355	0.0223054
Pabpc1	2527.21	0.176333	0.0406873	4.33386	1.47e-05	0.000599208
Chst11	1172.37	0.176296	0.0435145	4.05144	5.09e-05	0.00177543
Itprid2	2495.99	0.176036	0.0484362	3.6344	0.000278634	0.00706891
Naga	614.82	0.175482	0.0564888	3.1065	0.00189319	0.0313734
Rgs10	693.498	0.173992	0.055261	3.14855	0.00164084	0.0281982
Sirpa	4280.53	0.173983	0.0404484	4.30136	1.7e-05	0.000679081
Tle3	1094.48	0.173435	0.057128	3.0359	0.00239821	0.0373805
Pkd2	1158.53	0.171159	0.0546024	3.13464	0.00172064	0.0291873
Gja1	7423.55	0.170759	0.0485338	3.51836	0.000434221	0.0100067
Rap1b	1003.83	0.168646	0.0531248	3.17453	0.00150079	0.0266624
Mcl1	1838.7	0.168377	0.0487229	3.45581	0.000548641	0.0121347
Wsb1	2688.31	0.167403	0.0515791	3.24556	0.0011722	0.0220582
Lix1l	667.497	0.167118	0.0547908	3.05011	0.00228756	0.0360296
Stk40	967.455	0.165126	0.0490011	3.36984	0.000752111	0.015533
Rapgef3	1749.64	0.165029	0.0560185	2.94598	0.00321938	0.0467404
Edem1	740.542	0.164597	0.0510393	3.22491	0.00126012	0.0232103
Ak4	678.367	0.164504	0.0554636	2.96599	0.00301713	0.0445081
Rnf111	778.476	0.164295	0.0526377	3.12124	0.00180092	0.0302386
Rps6ka3	977.156	0.164139	0.050526	3.2486	0.00115975	0.0218988
Ano6	960.704	0.164136	0.0465475	3.52621	0.00042156	0.00979608
Wasf2	857.153	0.162808	0.0436232	3.73214	0.000189863	0.00517644
Rb1	988.315	0.162385	0.0494409	3.28443	0.00102189	0.0197701
Vcl	1502.57	0.161303	0.043726	3.68895	0.00022518	0.00592425
Scn4a	6.46947	0.160423	0.0520415	3.08261	0.00205197	0.0333031
Celf1	2026.09	0.159816	0.0480381	3.32686	0.000878312	0.0177619
Sft2d2	1079.23	0.158856	0.0481034	3.30239	0.000958642	0.0188556
Lats2	955.575	0.158111	0.0472388	3.34705	0.000816764	0.0167219
Tulp3	715.654	0.156091	0.0504856	3.09179	0.00198953	0.0325134
Ccl2	5.8712	0.15574	0.0496256	3.1383	0.00169929	0.0288845
Sun2	2410.4	0.155074	0.0396866	3.90746	9.33e-05	0.00289667
Tmem47	3422.13	0.154562	0.0343317	4.50203	6.73e-06	0.000307136
Sike1	545.054	0.154495	0.0525904	2.9377	0.00330656	0.047646
Atp1b3	3990.4	0.154427	0.0514662	3.00055	0.00269496	0.0408872
Laptm4a	5030.38	0.153616	0.0410589	3.74136	0.000183025	0.00500653
Scg3	7050.89	0.153265	0.0425436	3.60253	0.000315136	0.00778277
Eef1a1	33640.8	0.152858	0.0382202	3.99941	6.35e-05	0.0021238
Asah1	1496.87	0.151596	0.0398059	3.80838	0.000139878	0.00401228
Pag1	1016.23	0.151514	0.0496713	3.05034	0.00228582	0.0360296
Mlc1	5326.51	0.15114	0.0444405	3.40095	0.000671511	0.0142058
Trpv1	14.8992	0.149644	0.0471087	3.17656	0.00149031	0.0265047
Sec61a1	1341.11	0.147159	0.0413597	3.55804	0.000373633	0.00886949
Samd8	1493.01	0.146968	0.0431742	3.40406	0.000663914	0.0140631
Klhl24	1403.63	0.146553	0.0393783	3.72168	0.000197905	0.00536911
Lasp1	2137.72	0.146449	0.0420612	3.48182	0.000498021	0.0111756
Plpp3	3807.37	0.144739	0.0437648	3.30721	0.000942317	0.018646
Cpne1	1034.53	0.143353	0.045796	3.13025	0.0017466	0.0295173
Slf2	1268.39	0.143255	0.0414797	3.45363	0.000553095	0.0121843
Ctsa	3484.76	0.143138	0.0343622	4.16555	3.11e-05	0.00115061
Erlin2	1478.37	0.142808	0.0480123	2.97441	0.00293557	0.0435773
Frmd4a	1638.03	0.142303	0.0414886	3.42993	0.000603732	0.0130904
Igf2r	1334.22	0.142203	0.0434574	3.27223	0.00106703	0.0204756
Gns	2869.19	0.132933	0.0293344	4.53163	5.85e-06	0.000274725
Rnf38	1136.29	0.132771	0.045007	2.95002	0.00317753	0.0462547
Ccdc50	1506.78	0.132492	0.0421779	3.14128	0.00168211	0.028681
Add3	3319	0.129616	0.0286288	4.52747	5.97e-06	0.000278609
Hipk1	3049.71	0.125962	0.0376922	3.34185	0.000832227	0.0169964
Rps8	3940.19	0.124667	0.0352771	3.53393	0.000409424	0.00958145
Mindy2	2031.16	0.123936	0.0365833	3.38778	0.000704615	0.0146252
Cdk19	1899.14	0.12104	0.0377129	3.20951	0.0013296	0.0241934
Cst3	16707.6	0.118756	0.0358698	3.31076	0.000930441	0.0184991
Rps4x	4220.88	0.11561	0.0395836	2.92065	0.003493	0.0494528
Slc25a23	5212.19	0.103169	0.0317331	3.25116	0.00114935	0.0217771
Oat	2273.02	0.101946	0.034773	2.93177	0.00337034	0.0484356
Wdr1	3556.02	0.0834177	0.0272278	3.0637	0.00218617	0.0347641
Nedd4	12633	0.0801562	0.0261379	3.06667	0.00216461	0.0345877
Rundc3a	4861.64	-0.0865535	0.028247	-3.06416	0.0021828	0.0347616
Abr	9023.66	-0.0883376	0.0302513	-2.92013	0.00349891	0.049494
Ppp1r9b	7804.2	-0.0913038	0.030539	-2.98974	0.00279212	0.0419758
Ap3b2	4282.03	-0.0927801	0.0295067	-3.14437	0.00166444	0.028409
Cacnb4	3744.53	-0.0928212	0.0301842	-3.07516	0.00210392	0.0339459
Map7d1	7031.7	-0.0960359	0.0321719	-2.98509	0.00283494	0.0424649
Atp9a	9486.89	-0.096384	0.029302	-3.28933	0.00100428	0.01959
Cbx6	6247.4	-0.0969144	0.0310392	-3.12232	0.00179432	0.0301891
Fam120b	2555.41	-0.0977874	0.0320979	-3.04653	0.00231496	0.0363226
Mast2	3580.72	-0.100371	0.0342365	-2.93168	0.00337132	0.0484356
Gabra3	3063.3	-0.100917	0.0325446	-3.10088	0.00192949	0.0317837
Cdk16	6393.94	-0.101424	0.0332651	-3.04895	0.00229641	0.0361001
Napa	4356.15	-0.101474	0.0347767	-2.91788	0.00352415	0.0497658
Acot7	7966.7	-0.10289	0.0348417	-2.95308	0.00314624	0.0459522
Ppfia3	2654.23	-0.103951	0.0344832	-3.01453	0.00257377	0.0394103
Ap2a1	6771.45	-0.104002	0.0341613	-3.04443	0.00233121	0.0365429
Spock1	7263.25	-0.104234	0.0283035	-3.68273	0.00023075	0.0060515
Sptbn2	6631.58	-0.106289	0.0322258	-3.29827	0.000972837	0.019087
Myl12b	4557.01	-0.106963	0.0330226	-3.2391	0.00119908	0.0223603
Pygb	10819.1	-0.107699	0.0345467	-3.11748	0.00182404	0.0305338
Myh10	10072	-0.107947	0.0343283	-3.14456	0.00166338	0.028409
Gpx4	3978.45	-0.108627	0.0343797	-3.15962	0.00157973	0.0276486
Apba2	3641.28	-0.108701	0.0308956	-3.51834	0.000434256	0.0100067
Dynlrb1	1904.94	-0.10899	0.036803	-2.96144	0.00306201	0.0450897
Fnbp1	9167.89	-0.109578	0.0345667	-3.17006	0.00152409	0.0269604
Atp13a2	5369.41	-0.109686	0.034188	-3.2083	0.0013352	0.0242419
Wbp2	8601.14	-0.109703	0.0348135	-3.15116	0.00162621	0.0281058
Sms	3054.11	-0.109918	0.0369898	-2.97159	0.00296267	0.04394
Calm1	48700.7	-0.111873	0.0376646	-2.97025	0.00297555	0.0440613
Csnk1g2	2756.35	-0.112232	0.0328642	-3.41502	0.000637774	0.0137126
Mapk6	2919.58	-0.112303	0.0355124	-3.16237	0.00156493	0.0275153
Mapre3	3801.96	-0.113576	0.035139	-3.23219	0.00122846	0.0228052
Scamp1	5749.37	-0.114314	0.0360154	-3.17404	0.00150331	0.0266784
Tmtc1	2685.99	-0.114494	0.0380208	-3.01134	0.00260096	0.039753
Camta2	4716.17	-0.115858	0.03601	-3.21738	0.00129369	0.0236966
Insyn1	2334.8	-0.116232	0.0388518	-2.99167	0.00277453	0.0419019
Hint1	2919.29	-0.118078	0.0402829	-2.93122	0.00337634	0.0484357
Snn	5941.77	-0.118326	0.0357717	-3.30781	0.000940272	0.018646
Copg2	2564.02	-0.118936	0.0381409	-3.11832	0.00181885	0.0304777
Tle5	10816.3	-0.118961	0.0338792	-3.51134	0.00044586	0.0102171
Slc27a4	2865.46	-0.119028	0.039898	-2.98331	0.00285153	0.0425592
Mcf2l	3519.06	-0.119091	0.0364787	-3.26468	0.00109588	0.0209804
Dnm3	8555.65	-0.120234	0.0369868	-3.25073	0.00115109	0.021785
Fxr2	3783.06	-0.120319	0.0372909	-3.22649	0.00125317	0.0231587
Ndufa13	2594.24	-0.120463	0.0367624	-3.27679	0.00104994	0.020218
Lrp3	2589.63	-0.121572	0.0370091	-3.28492	0.00102011	0.0197589
Gphn	1864.46	-0.122079	0.0376362	-3.24365	0.0011801	0.0221061
Rab4b	1529.56	-0.122096	0.04179	-2.92165	0.00348178	0.0494528
Kif5a	57503.5	-0.122413	0.0326712	-3.74682	0.000179094	0.00493164
Sptan1	25737.7	-0.122551	0.0387573	-3.162	0.0015669	0.0275153
Cope	1767	-0.122678	0.0406034	-3.02137	0.00251633	0.0388107
Ggt7	3124.14	-0.123464	0.0413396	-2.98659	0.00282108	0.0422957
Rims1	2462.4	-0.123524	0.0347927	-3.55029	0.000384808	0.0090696
Tmem150c	1700.07	-0.123835	0.0400287	-3.09366	0.00197704	0.0324375
Tbc1d9b	7714.34	-0.123938	0.036018	-3.44101	0.000579539	0.0126155
Sez6l2	16208.1	-0.123939	0.0387018	-3.2024	0.00136286	0.0246899
Tecr	10836.1	-0.124711	0.0344221	-3.623	0.000291203	0.00733424
Ccdc136	2532.44	-0.125044	0.0425289	-2.94021	0.00327995	0.04737
Plbd2	3413.69	-0.125139	0.0411824	-3.03866	0.00237629	0.0371439
Emc10	4078.63	-0.12533	0.0334222	-3.7499	0.000176902	0.00488758
Fbxo44	2948.86	-0.125533	0.0409493	-3.06557	0.00217258	0.0346816
Tln2	5332.25	-0.125611	0.0360202	-3.48725	0.000488021	0.0110227
Kcnh2	3551.98	-0.125654	0.040398	-3.11041	0.00186827	0.0310851
Asph	3503.59	-0.126372	0.0425814	-2.96777	0.00299973	0.0443305
Wdtc1	2163.86	-0.127828	0.0433016	-2.95204	0.00315684	0.0459942
Prkaca	6294.06	-0.128177	0.0385085	-3.32855	0.000873002	0.0176762
Copg1	9817.75	-0.128322	0.0345998	-3.70875	0.000208285	0.00556843
Hdlbp	7063.99	-0.128326	0.0357381	-3.59073	0.000329759	0.00804421
Agl	2463.1	-0.128588	0.0440867	-2.91671	0.0035375	0.0498691
Map6	3912.81	-0.129073	0.0388597	-3.32151	0.000895308	0.0179736
Prkcz	3612.99	-0.129291	0.0361477	-3.57675	0.00034789	0.00835442
Dhdds	2329.44	-0.129648	0.0434409	-2.98447	0.0028407	0.0424921
Tnk2	10081.4	-0.129869	0.0382497	-3.3953	0.000685535	0.0143919
Acss2	2184.64	-0.130071	0.0435302	-2.98807	0.00280745	0.0421297
Agtpbp1	4018.88	-0.130355	0.0416235	-3.13175	0.00173765	0.0294154
Reep2	2470.99	-0.130679	0.0397528	-3.28728	0.00101159	0.019663
Cltb	4400.42	-0.130792	0.0341199	-3.8333	0.000126438	0.00369082
Fkbp8	5853.83	-0.130924	0.0329685	-3.97118	7.15e-05	0.00232148
Gm15612	2331.73	-0.131001	0.0439772	-2.97884	0.00289346	0.0430692
Usp5	5644.14	-0.131318	0.0364351	-3.60417	0.00031315	0.00775691
Ppp1r13b	1940.59	-0.131546	0.043828	-3.00141	0.00268731	0.0408085
Micu1	2181.83	-0.131604	0.0415774	-3.16527	0.00154938	0.0273784
Kcnab3	2682.47	-0.132132	0.0448985	-2.9429	0.00325155	0.0471247
Yipf3	1096.52	-0.132338	0.0433358	-3.05377	0.00225985	0.0356953
Ube2o	5265.87	-0.13297	0.0326159	-4.07686	4.56e-05	0.00161168
Uchl1	11872	-0.13311	0.0400749	-3.32154	0.000895228	0.0179736
Creld1	1761.78	-0.133429	0.0423137	-3.15333	0.00161417	0.0281026
Ncoa7	2217.11	-0.133447	0.0393668	-3.38984	0.000699334	0.0145889
Lgi1	2090.11	-0.133698	0.034278	-3.9004	9.6e-05	0.00296569
Rtl8c	3103.77	-0.133928	0.0355408	-3.76829	0.000164367	0.00460284
Atp5d	3485.95	-0.133984	0.044123	-3.03659	0.00239269	0.0373295
H1f0	2496.81	-0.134901	0.0415533	-3.24644	0.00116857	0.0220149
Creg2	2018.64	-0.134917	0.0390911	-3.45136	0.000557766	0.0122708
Sacs	3325.52	-0.134978	0.0462871	-2.9161	0.00354439	0.0499236
Mapk8ip1	10052.8	-0.13499	0.0357585	-3.77505	0.000159973	0.00449503
Zdhhc3	2716.96	-0.135074	0.0396076	-3.4103	0.000648921	0.0138598
Ina	8131.53	-0.135094	0.0419145	-3.22309	0.00126817	0.0233067
Fam219a	4172.63	-0.135225	0.0344091	-3.92993	8.5e-05	0.00267913
Aplp1	35841	-0.135254	0.0443247	-3.05144	0.00227749	0.0359395
Npdc1	3229.43	-0.135329	0.0427806	-3.16334	0.00155973	0.0274731
Dmtn	4516	-0.135425	0.0357301	-3.79023	0.000150505	0.00427212
Sh3glb2	3907.18	-0.136051	0.0393419	-3.45817	0.000543863	0.0120705
Scn1b	6803.02	-0.136296	0.0438271	-3.10986	0.00187178	0.0311123
Dpysl3	3112.18	-0.136425	0.0427271	-3.19295	0.00140828	0.0253737
Slc6a9	7932.54	-0.136905	0.0463633	-2.95286	0.0031484	0.0459522
Ache	5192.54	-0.137522	0.0374095	-3.67613	0.000236802	0.00618079
Ccdc91	1521.89	-0.138362	0.0462779	-2.98981	0.0027915	0.0419758
Kndc1	9329.52	-0.138588	0.0350091	-3.95862	7.54e-05	0.00242318
Map1lc3a	2701.67	-0.139121	0.0452151	-3.07687	0.0020919	0.0338846
Dst	21402	-0.13952	0.0352368	-3.95949	7.51e-05	0.00241906
Ipo11	1148.32	-0.139598	0.0473743	-2.94671	0.00321178	0.046671
Smyd2	1873.15	-0.139718	0.046334	-3.01546	0.00256589	0.0393434
Faim2	20202.6	-0.139773	0.035907	-3.89265	9.92e-05	0.00304505
Camk2g	11083.8	-0.139824	0.0351488	-3.97806	6.95e-05	0.00227765
Nsg1	6681.41	-0.140011	0.0478507	-2.926	0.00343353	0.0489549
Ppp1r3f	958.416	-0.140182	0.0479226	-2.92518	0.00344253	0.0490323
Ndufs7	1996.3	-0.140538	0.0391421	-3.59045	0.000330104	0.00804421
Clasp1	4220.24	-0.141178	0.0417572	-3.38092	0.000722426	0.0149573
Podxl2	5537.46	-0.141257	0.0396177	-3.5655	0.00036316	0.00867071
Tubg1	983.331	-0.141509	0.0475048	-2.97883	0.00289352	0.0430692
Lgi3	8438.22	-0.142127	0.0443891	-3.20185	0.00136548	0.0247103
Ndufb6	1111.13	-0.142152	0.045943	-3.09409	0.00197414	0.0324223
Rph3a	22025.7	-0.142435	0.0451938	-3.15165	0.00162353	0.0281058
Dok7	904.729	-0.142794	0.0472269	-3.02358	0.00249803	0.0386808
Slc25a27	1924.71	-0.143513	0.0467361	-3.0707	0.00213557	0.0342229
Akap6	6703.41	-0.143589	0.0379859	-3.78006	0.000156791	0.00441312
Klc1	15499.7	-0.143605	0.0317592	-4.52169	6.13e-06	0.000285524
Nfic	6826.56	-0.14407	0.0374419	-3.84784	0.000119163	0.00352202
Limk1	6238.29	-0.144118	0.048196	-2.99024	0.00278754	0.0419758
4933431E20Rik	3822.6	-0.144154	0.0445648	-3.23471	0.00121767	0.0226558
Pde8b	1101.19	-0.144349	0.0466663	-3.09322	0.00197996	0.0324533
Tmem132b	1663.41	-0.14435	0.0492982	-2.92811	0.00341033	0.0487418
Maneal	1392.83	-0.144469	0.0411746	-3.5087	0.00045031	0.0103047
Magi3	1585.49	-0.144622	0.0491555	-2.94214	0.00325956	0.0471994
Ywhag	32774.5	-0.146019	0.0350201	-4.16958	3.05e-05	0.00113952
Tomm7	901.275	-0.146055	0.0476997	-3.06197	0.00219886	0.0348987
Nacc2	13017.3	-0.146331	0.0369049	-3.96509	7.34e-05	0.00237254
Rtn2	2108.57	-0.146349	0.0424563	-3.44704	0.000566755	0.0124026
Ptpn5	2956.29	-0.146381	0.040894	-3.57952	0.00034423	0.00829063
Trpm2	2118.16	-0.146384	0.0402681	-3.63523	0.000277737	0.00705964
Kcna1	15708.6	-0.146499	0.0474237	-3.08915	0.0020073	0.0327389
Gas6	4315.56	-0.148062	0.0450928	-3.28349	0.00102529	0.0198126
Bnip3	2482.6	-0.148104	0.0478904	-3.09257	0.00198432	0.0324604
Rbfox3	3498.38	-0.148242	0.0437419	-3.38903	0.000701414	0.0145964
Bcan	9965.53	-0.148293	0.0370032	-4.00756	6.13e-05	0.00207779
Tvp23a	1325.55	-0.149208	0.0494168	-3.01937	0.00253301	0.0389669
Nacad	2980.93	-0.149446	0.0475898	-3.14029	0.00168779	0.0287184
5730409E04Rik	2837.92	-0.149939	0.0385407	-3.8904	0.000100079	0.00306774
Ndufb8	3958.52	-0.150051	0.0446889	-3.35768	0.000786009	0.0161523
Thsd7a	1797	-0.150075	0.0513232	-2.92413	0.00345425	0.0491146
Dock9	7074.32	-0.150082	0.04634	-3.23871	0.00120073	0.0223658
Ctnnbip1	1143.89	-0.150193	0.0476634	-3.15111	0.0016265	0.0281058
Cpt1a	1761.29	-0.151022	0.0474641	-3.18182	0.0014635	0.0261123
Slc9a1	1839.35	-0.151214	0.0412846	-3.66273	0.000249545	0.00646236
Mast1	4623.77	-0.151885	0.0421138	-3.60653	0.000310318	0.00770988
Dnaja4	1279.45	-0.152076	0.0519751	-2.92594	0.00343413	0.0489549
Ak1	2469.21	-0.152735	0.0449214	-3.40004	0.000673748	0.0142348
Thoc3	699.064	-0.152833	0.0480256	-3.18232	0.00146099	0.0260957
Cplx1	28388.9	-0.152998	0.0507317	-3.01583	0.00256277	0.0393434
Slc25a1	1712.65	-0.153238	0.0473936	-3.2333	0.00122371	0.0227425
Pgs1	2162.52	-0.153362	0.0488326	-3.14057	0.00168618	0.0287184
Gls2	1112.99	-0.153517	0.0494729	-3.10306	0.00191531	0.0316131
Ppa2	879.823	-0.153685	0.0493353	-3.11511	0.00183879	0.0307183
Gne	1149.85	-0.153789	0.0488473	-3.14837	0.00164185	0.0281982
Arhgdig	957.024	-0.154002	0.0497971	-3.09259	0.00198416	0.0324604
Mllt11	4386.09	-0.154158	0.0373133	-4.13145	3.6e-05	0.00131476
Spred2	1053.44	-0.155046	0.0491083	-3.15722	0.00159281	0.0277892
Parva	4175.1	-0.155176	0.0362918	-4.27578	1.9e-05	0.000751051
Uqcrq	1646.22	-0.155499	0.0507689	-3.06288	0.0021922	0.0348265
Stk39	2990.33	-0.155869	0.0458754	-3.39766	0.000679643	0.0143045
Cadm3	8459.92	-0.156047	0.0368277	-4.23721	2.26e-05	0.000869587
Nckipsd	2407.43	-0.156424	0.0461159	-3.39198	0.000693899	0.0145305
Omg	3081.84	-0.156785	0.0406091	-3.86083	0.000113002	0.00339426
Ap1b1	5974.17	-0.157693	0.0538503	-2.92837	0.00340747	0.0487418
Slitrk1	1597.78	-0.158256	0.0378746	-4.17842	2.94e-05	0.00109972
Camkk1	3881.59	-0.158482	0.0427042	-3.71114	0.000206325	0.00554293
Megf10	2015.96	-0.158565	0.0495734	-3.19858	0.00138105	0.0249646
Apbb1	8706.07	-0.158784	0.0360664	-4.40254	1.07e-05	0.000456774
Kcnc4	1824.18	-0.158799	0.0403384	-3.93666	8.26e-05	0.00262016
Sh3bp5l	1731.62	-0.15942	0.0436139	-3.65526	0.00025692	0.00660159
Tmem150b	2696.25	-0.159472	0.0544192	-2.93043	0.00338489	0.048504
Vxn	1310.08	-0.159533	0.0527843	-3.02235	0.00250817	0.0387652
Stx18	1402.91	-0.159602	0.0447604	-3.56568	0.000362909	0.00867071
Atl1	1869.22	-0.159999	0.0434442	-3.68286	0.00023063	0.0060515
Clec2l	1107.52	-0.160509	0.0522151	-3.074	0.00211209	0.0339608
Tomm40	1304.34	-0.160711	0.0409661	-3.92302	8.74e-05	0.00274674
Ncs1	9875.37	-0.160781	0.0386782	-4.15689	3.23e-05	0.0011871
Ptch1	3268.51	-0.160844	0.0494914	-3.24993	0.00115433	0.0218213
Eme2	579.907	-0.160911	0.0505023	-3.18621	0.00144152	0.0258597
Mdp1	801.948	-0.161559	0.0459831	-3.51344	0.000442349	0.0101507
Calm3	28524	-0.161586	0.0413036	-3.91216	9.15e-05	0.00285017
Herc3	3133.7	-0.161622	0.0416038	-3.8848	0.000102414	0.00313349
Nkiras1	3194.11	-0.162797	0.0485453	-3.3535	0.000797963	0.0163776
Kif5c	22025.4	-0.16334	0.0403469	-4.0484	5.16e-05	0.00178452
Slc45a4	2250.01	-0.163591	0.0423467	-3.86314	0.000111941	0.00337497
Lrrc4b	3336.79	-0.163739	0.0518115	-3.16028	0.00157617	0.0276156
Phactr1	4333.66	-0.16381	0.0321768	-5.09093	3.56e-07	2.27e-05
Psmc5	5657.61	-0.164091	0.0529174	-3.10089	0.00192939	0.0317837
Sult4a1	10021.4	-0.164261	0.0420941	-3.90223	9.53e-05	0.00295296
Habp4	6199.3	-0.164558	0.0405637	-4.05677	4.98e-05	0.00174169
Lpcat4	1991.78	-0.164819	0.042676	-3.8621	0.000112416	0.00338312
Eps8l3	1397.15	-0.164855	0.0510804	-3.22736	0.00124939	0.0231417
Hecw1	2228.67	-0.164949	0.045072	-3.65967	0.000252537	0.00650923
Grid1	1196.48	-0.165661	0.0410063	-4.0399	5.35e-05	0.00183682
Borcs5	614.051	-0.166792	0.0557695	-2.99075	0.00278295	0.0419524
Mapk8ip2	7831.62	-0.167141	0.0439433	-3.80355	0.000142639	0.00407336
D430041D05Rik	2084.74	-0.167592	0.043413	-3.86041	0.000113197	0.00339426
Dpcd	1071.71	-0.168473	0.0556757	-3.02597	0.0024784	0.0384129
Sipa1l3	1896.97	-0.168484	0.0459648	-3.66551	0.000246849	0.00640257
Tmem250-ps	2411.79	-0.168632	0.0450175	-3.74593	0.000179727	0.00494085
Brsk1	8400.84	-0.169066	0.0385273	-4.3882	1.14e-05	0.000481722
Slc7a14	4557.24	-0.169085	0.0512594	-3.29861	0.000971636	0.019087
Chga	8709.11	-0.169333	0.0483917	-3.49921	0.000466637	0.0106049
Tigar	1068.41	-0.169396	0.0573816	-2.9521	0.00315624	0.0459942
Sigmar1	949.841	-0.169415	0.0510417	-3.31915	0.00090291	0.0181042
Klhl4	1113.64	-0.169813	0.0574384	-2.95644	0.00311217	0.0456438
Mpi	981.007	-0.169979	0.0449582	-3.78082	0.000156315	0.00441312
Stard4	1252.57	-0.170103	0.0512031	-3.32212	0.000893373	0.0179736
Selenom	1865.36	-0.170526	0.0474624	-3.59287	0.000327051	0.00799341
Nxpe3	1461.47	-0.170703	0.0496514	-3.43803	0.00058596	0.0127385
Cntn4	919.313	-0.171266	0.0475827	-3.59934	0.000319024	0.00786703
Mypop	1230.04	-0.171308	0.044516	-3.84823	0.000118975	0.00352202
Abcb9	1467.39	-0.171448	0.0545039	-3.14562	0.00165737	0.0283469
Laptm4b	3838.66	-0.171992	0.0413112	-4.16333	3.14e-05	0.00115926
P4htm	1628.84	-0.172093	0.0427154	-4.02882	5.61e-05	0.00190962
Guk1	1542.78	-0.172336	0.0466322	-3.69565	0.000219327	0.00581658
Pou3f3	1315.93	-0.173082	0.0562746	-3.07567	0.00210033	0.0339459
Cox6a1	3712.31	-0.173522	0.0484579	-3.58088	0.000342441	0.00825959
Dkk3	2973.47	-0.173738	0.052544	-3.30653	0.000944603	0.018646
Metrn	2094.08	-0.173742	0.0540682	-3.21338	0.00131181	0.0239496
Lrrtm3	638.219	-0.174334	0.0579008	-3.0109	0.00260474	0.0397741
Cd7	6.53848	-0.174824	0.0597256	-2.92712	0.00342117	0.0488545
Stmn3	9496.57	-0.174825	0.0443263	-3.94405	8.01e-05	0.00256033
Septin9	1231.09	-0.17536	0.0530255	-3.3071	0.000942687	0.018646
Gpr137	2610.24	-0.175399	0.0385702	-4.54752	5.43e-06	0.000256243
Plcb1	2457.49	-0.1754	0.0498708	-3.5171	0.000436294	0.0100396
Fam189b	1353.31	-0.175633	0.0528109	-3.3257	0.000881961	0.0177921
Lamp5	6013.08	-0.175815	0.05985	-2.93759	0.00330771	0.047646
Rasal2	1998.41	-0.175894	0.042765	-4.11303	3.9e-05	0.00141177
Iscu	2034.81	-0.175973	0.0558883	-3.14865	0.00164026	0.0281982
Ano4	1383.85	-0.176116	0.0444315	-3.96377	7.38e-05	0.00238074
Klc2	8844.1	-0.177611	0.0395006	-4.4964	6.91e-06	0.000312842
Arhgap24	583.846	-0.177798	0.0576105	-3.08621	0.00202722	0.0329663
Ndufb7	1479.72	-0.178044	0.0494207	-3.60262	0.000315028	0.00778277
Syt2	20458.7	-0.17832	0.0487665	-3.65661	0.000255569	0.00657712
Uqcr11	1429.11	-0.178422	0.0455803	-3.91446	9.06e-05	0.00282991
Zmat5	1412.58	-0.17886	0.0581684	-3.07487	0.00210595	0.0339459
Ckb	41655.7	-0.178904	0.0311264	-5.74766	9.05e-09	8.12e-07
Parm1	882.945	-0.179426	0.0599751	-2.99168	0.00277451	0.0419019
Mmp17	817.963	-0.179773	0.052624	-3.41618	0.000635063	0.0136978
Lrrc75b	1861.21	-0.179826	0.0470834	-3.8193	0.000133831	0.00387241
Jak1	5294.74	-0.18049	0.0384314	-4.69643	2.65e-06	0.000135003
Syt3	2581.25	-0.180515	0.0473969	-3.80859	0.000139761	0.00401228
Pcdh11x	455.529	-0.180817	0.059894	-3.01895	0.00253652	0.0389845
Gria4	4720.19	-0.181238	0.0477187	-3.79805	0.000145836	0.00414717
Asah2	2194.28	-0.181444	0.0548937	-3.30536	0.000948531	0.0187012
Sfrp1	734.806	-0.182358	0.0609669	-2.99111	0.00277969	0.0419417
Arhgef4	8318.69	-0.182412	0.0324254	-5.62558	1.85e-08	1.53e-06
Hsd17b11	1112.4	-0.182751	0.0595427	-3.06924	0.00214604	0.0343575
Insig1	2895.81	-0.183136	0.0543368	-3.37039	0.000750617	0.0155215
A830018L16Rik	867.49	-0.183626	0.0496944	-3.6951	0.000219803	0.00581984
Ccdc124	1212.48	-0.183763	0.0417577	-4.40069	1.08e-05	0.0004595
Gpc1	3002.37	-0.183767	0.04102	-4.47993	7.47e-06	0.000334319
Rgs7bp	3241.14	-0.184403	0.0537055	-3.43359	0.00059564	0.0129319
Rell2	4794.02	-0.184638	0.0463228	-3.98591	6.72e-05	0.00223019
Dync1i1	3803.94	-0.185032	0.0465582	-3.9742	7.06e-05	0.00230576
Cdk5r2	1888.25	-0.185211	0.0543452	-3.40805	0.000654289	0.0139271
B3galt5	5417.78	-0.185289	0.0559638	-3.31087	0.000930072	0.0184991
Trnp1	2434.51	-0.185716	0.0600028	-3.09513	0.00196726	0.0323414
Clmp	846.645	-0.186226	0.0630366	-2.95426	0.00313422	0.0458667
Vegfa	2320.5	-0.186469	0.0567195	-3.28756	0.00101059	0.019663
Kcnab2	13933.9	-0.186794	0.0461418	-4.04825	5.16e-05	0.00178452
Dnajc15	608.87	-0.187354	0.0629762	-2.975	0.00292989	0.0435321
Lnx1	767.553	-0.187814	0.0463646	-4.0508	5.1e-05	0.00177543
Cend1	8598.86	-0.188545	0.0489361	-3.85288	0.000116737	0.00347519
Crtac1	2311.94	-0.189152	0.0460074	-4.11133	3.93e-05	0.00141913
Ppp4r1l-ps	487.691	-0.189706	0.0609549	-3.11224	0.00185675	0.0309247
Gabra5	1293.71	-0.189721	0.0459612	-4.12785	3.66e-05	0.00133259
Slc32a1	4261.79	-0.189837	0.052623	-3.6075	0.000309161	0.00769393
Timm8b	1176.74	-0.190094	0.0490128	-3.87845	0.000105126	0.0031928
Lypd6	429.816	-0.19045	0.0628258	-3.0314	0.00243422	0.0378346
Pdk3	680.696	-0.190773	0.0548276	-3.47951	0.000502323	0.0112306
Diras2	3431.63	-0.19091	0.0351988	-5.42376	5.84e-08	4.34e-06
Cabp1	1844.72	-0.190929	0.0546729	-3.4922	0.000479056	0.0108424
Prrt3	997.929	-0.191169	0.0582455	-3.28212	0.00103028	0.0198859
Mcu	661.11	-0.191465	0.0560543	-3.41571	0.000636166	0.0137037
Unc5b	3090.44	-0.19175	0.055448	-3.45818	0.00054383	0.0120705
Plekhm2	4419.41	-0.191867	0.0445163	-4.31004	1.63e-05	0.000654551
Kcnip1	1105.91	-0.192288	0.0582213	-3.30271	0.000957545	0.0188556
Pgp	1831.89	-0.193091	0.05575	-3.46351	0.000533175	0.0118881
Chst12	604.214	-0.193136	0.0543372	-3.5544	0.000378844	0.00896742
Spire2	933.26	-0.19335	0.0499813	-3.86845	0.000109528	0.00330828
Kcnh1	746.341	-0.193425	0.0521695	-3.70762	0.000209216	0.00558428
Nos1ap	1367.27	-0.193752	0.0588028	-3.29495	0.00098439	0.0192478
Peli3	1485.56	-0.194057	0.0509396	-3.80956	0.000139215	0.00400716
Myh14	3712.91	-0.194162	0.0493028	-3.93816	8.21e-05	0.00260882
Clstn2	1595.31	-0.194351	0.052535	-3.69947	0.000216052	0.00574816
Abi3	1347.05	-0.194816	0.0615825	-3.16349	0.0015589	0.0274731
Paqr9	1772.57	-0.197117	0.0394047	-5.00239	5.66e-07	3.41e-05
BC034090	631.425	-0.197297	0.0530993	-3.71563	0.0002027	0.00547223
Scn4b	14182.1	-0.197473	0.0554837	-3.55912	0.000372103	0.00884588
Tdrp	729.701	-0.198677	0.0656018	-3.02853	0.00245748	0.0381603
Mcam	2026.29	-0.198693	0.0559361	-3.55214	0.000382113	0.00903187
Hecw2	1191.68	-0.198861	0.0463505	-4.29039	1.78e-05	0.000710101
Cmpk2	894.331	-0.200401	0.047819	-4.19082	2.78e-05	0.00104369
Fgf9	852.075	-0.2005	0.0617908	-3.24481	0.00117528	0.0220798
Prune2	7080.89	-0.202344	0.0362871	-5.5762	2.46e-08	1.94e-06
Kctd17	2674.25	-0.202415	0.046075	-4.39317	1.12e-05	0.000473254
Acat2	962.039	-0.202704	0.0501547	-4.04158	5.31e-05	0.00182749
Syndig1	1194.55	-0.202735	0.0538996	-3.76134	0.000169006	0.00470087
Tubb3	12706	-0.203932	0.0575964	-3.54072	0.000399044	0.00937839
Etv1	1419.72	-0.20402	0.0616992	-3.30669	0.000944041	0.018646
Capn1	1213.19	-0.204155	0.0536425	-3.80584	0.000141322	0.00404667
Tns1	3999.38	-0.204696	0.0600472	-3.40892	0.000652202	0.0139041
Nat8l	22163.6	-0.205245	0.0496611	-4.13291	3.58e-05	0.00131225
Mcf2	637.915	-0.205709	0.0693241	-2.96735	0.0030038	0.044351
Sap30l	796.735	-0.206041	0.0670301	-3.07387	0.00211305	0.0339608
Gpd1	4566.79	-0.206334	0.0635988	-3.24431	0.00117736	0.0220798
Cdr2	1657.65	-0.206384	0.0470636	-4.38522	1.16e-05	0.000487123
Tubb4b	8657.74	-0.208741	0.0430383	-4.85013	1.23e-06	6.82e-05
Hspa12a	7430.66	-0.209452	0.0360479	-5.81039	6.23e-09	5.69e-07
Fam57b	2672.58	-0.20967	0.0497547	-4.21407	2.51e-05	0.0009526
St3gal5	1693.64	-0.209819	0.0394531	-5.31819	1.05e-07	7.63e-06
Fam43b	544.354	-0.209964	0.0685248	-3.06406	0.00218358	0.0347616
Zfyve28	1115.82	-0.210987	0.0601479	-3.50781	0.000451808	0.0103247
Slc7a10	3001.24	-0.211392	0.062231	-3.39689	0.000681575	0.014327
Asic1	2355.75	-0.211982	0.0409875	-5.17186	2.32e-07	1.55e-05
Pygm	3807.08	-0.212562	0.064183	-3.31181	0.000926953	0.0184742
Slit2	1556.49	-0.212848	0.0502258	-4.23781	2.26e-05	0.000869587
Cacna2d3	2114.45	-0.213123	0.0577032	-3.69344	0.00022124	0.00583921
Bcas1os2	1018.57	-0.213172	0.0725293	-2.93911	0.00329154	0.047496
Acan	916.021	-0.213681	0.0620228	-3.4452	0.000570628	0.0124708
Stmn2	8896.97	-0.213706	0.048191	-4.43456	9.23e-06	0.000402203
Tmem125	859.912	-0.214086	0.0596518	-3.58892	0.000332047	0.00806776
Vstm5	413.259	-0.214576	0.0615349	-3.48706	0.000488357	0.0110227
Cabp7	5817.03	-0.214587	0.0653234	-3.285	0.00101984	0.0197589
Ppip5k2	1821.46	-0.21592	0.0526385	-4.10195	4.1e-05	0.00147471
Olig1	5696.53	-0.216605	0.0549582	-3.94127	8.11e-05	0.00258023
Pacrg	345.016	-0.216679	0.061951	-3.49759	0.000469475	0.0106548
Lgr5	645.074	-0.217412	0.0682791	-3.18416	0.00145174	0.0259866
Entpd3	1302.66	-0.218536	0.0533385	-4.09715	4.18e-05	0.00149903
Cptp	853.272	-0.219222	0.0550539	-3.98196	6.83e-05	0.00224956
Rnasel	311.476	-0.21961	0.0730775	-3.00517	0.00265436	0.0404197
Ankrd55	580.097	-0.219782	0.0554297	-3.96505	7.34e-05	0.00237254
Epb41l3	15663.8	-0.220285	0.0415541	-5.30117	1.15e-07	8.33e-06
Nexn	363.039	-0.220797	0.0684847	-3.22403	0.00126399	0.0232558
Cgnl1	3411.15	-0.220883	0.0425866	-5.18668	2.14e-07	1.46e-05
Glra1	2804.41	-0.221183	0.0707487	-3.12632	0.00177008	0.0298117
Rerg	463.447	-0.222036	0.0589568	-3.76608	0.000165829	0.0046281
Ppp2r2b	2483.17	-0.222236	0.0457911	-4.85325	1.21e-06	6.73e-05
Mtap	743.661	-0.222398	0.063123	-3.52325	0.000426284	0.00987101
Sppl2b	1305.41	-0.222414	0.069102	-3.21863	0.00128805	0.0236195
Tmem229b	2284.86	-0.223994	0.0559582	-4.00287	6.26e-05	0.00210574
Pcp4l1	6027.34	-0.224123	0.0364435	-6.14988	7.75e-10	8.72e-08
Efna3	589.732	-0.224208	0.0526813	-4.25593	2.08e-05	0.000818942
Slc25a29	307.954	-0.224557	0.0672932	-3.33699	0.000846908	0.0172535
Them6	1645.74	-0.225446	0.0563335	-4.00199	6.28e-05	0.00210933
Vamp1	32648	-0.226102	0.0585847	-3.85941	0.00011366	0.00340198
Olig2	1277.59	-0.226915	0.0767414	-2.95689	0.00310764	0.0456395
Mgst3	1495.07	-0.227266	0.0570671	-3.98243	6.82e-05	0.00224956
Slc29a4	1067.61	-0.227653	0.0505497	-4.50354	6.68e-06	0.00030586
Ccdc88c	1145.52	-0.228012	0.045913	-4.96616	6.83e-07	3.99e-05
Atp10b	244.355	-0.228097	0.0769244	-2.96521	0.00302479	0.0445813
Ankrd6	1157.83	-0.228311	0.0463	-4.93113	8.18e-07	4.72e-05
Cacng2	1567.64	-0.228454	0.0635636	-3.59411	0.000325505	0.00797923
Gmpr	1454.03	-0.228816	0.0607377	-3.76728	0.000165034	0.00461369
Hapln2	3732.75	-0.229034	0.0493732	-4.63883	3.5e-06	0.000171272
Prima1	413.862	-0.230243	0.0672031	-3.42608	0.000612354	0.0132426
Birc7	11.7343	-0.230613	0.07177	-3.21323	0.00131252	0.0239496
Adam23	7607.71	-0.230757	0.0462275	-4.99177	5.98e-07	3.58e-05
Phospho1	1374.02	-0.23177	0.0633121	-3.66075	0.000251477	0.00649203
Camk1d	4146.62	-0.232008	0.0471925	-4.9162	8.82e-07	5.01e-05
Pigz	661.069	-0.232021	0.0512212	-4.52979	5.9e-06	0.000276351
Ttc39a	391.503	-0.232153	0.0723058	-3.21071	0.00132408	0.0241195
Fbxo31	3493.44	-0.232446	0.0441244	-5.26798	1.38e-07	9.7e-06
Abhd17a	2094.22	-0.232892	0.0586221	-3.97276	7.1e-05	0.00231518
Atp8a2	1615.91	-0.233038	0.0739207	-3.15255	0.00161854	0.0281058
Cldn10	1135.25	-0.233348	0.0793252	-2.94166	0.00326453	0.0472299
Esyt1	2995.32	-0.234227	0.0421218	-5.56071	2.69e-08	2.11e-06
Dexi	1296.75	-0.234533	0.0540141	-4.34206	1.41e-05	0.000580129
Nell1	1040.24	-0.234978	0.0586609	-4.0057	6.18e-05	0.00208492
Adam19	1272.34	-0.235432	0.065071	-3.61809	0.000296789	0.00746355
Gjc2	1911.42	-0.235842	0.077626	-3.03818	0.00238015	0.037169
Frmpd3	1622.61	-0.23654	0.0433665	-5.45444	4.91e-08	3.72e-06
Hcn2	8705.98	-0.237424	0.0594455	-3.99397	6.5e-05	0.00216434
Dusp15	1664.83	-0.237447	0.058169	-4.08201	4.46e-05	0.00158979
Apln	1698.19	-0.238027	0.0698812	-3.40616	0.000658824	0.0139732
Carmil2	1743.08	-0.239088	0.0515184	-4.64082	3.47e-06	0.00017064
Map1b	44100.2	-0.239269	0.0484706	-4.93638	7.96e-07	4.61e-05
Nphs1os	8.19826	-0.240195	0.0666359	-3.60459	0.000312651	0.00775619
Pgr	509.31	-0.241279	0.0636648	-3.78983	0.000150747	0.00427212
1700003D09Rik	297.712	-0.241557	0.0766838	-3.15004	0.00163248	0.0281249
Aard	223.511	-0.241817	0.0724536	-3.33755	0.000845218	0.0172404
Ar	683.49	-0.242141	0.0597722	-4.05106	5.1e-05	0.00177543
Aldh1a7	22.4777	-0.243012	0.0786177	-3.09106	0.00199444	0.0325615
Plekhd1	852.729	-0.243186	0.0546778	-4.44762	8.68e-06	0.000383564
Hddc2	261.263	-0.2444	0.0708308	-3.45048	0.0005596	0.0122785
Fbxo2	3066.88	-0.244861	0.0497578	-4.92107	8.61e-07	4.94e-05
Lrsam1	1759.11	-0.24493	0.0493102	-4.96713	6.8e-07	3.98e-05
Vit	213.315	-0.245495	0.0787163	-3.11873	0.00181631	0.0304661
Necab3	1188.15	-0.245612	0.0549058	-4.47334	7.7e-06	0.000342939
Mchr1	192.627	-0.245737	0.0760544	-3.23107	0.00123329	0.0228691
Kif5b	13981.9	-0.246364	0.0482604	-5.1049	3.31e-07	2.14e-05
Fndc4	2716.85	-0.246893	0.0423145	-5.83471	5.39e-09	5.01e-07
Asb16	319.011	-0.247459	0.0761033	-3.25162	0.00114749	0.0217668
Btbd17	478.571	-0.248501	0.0794411	-3.12811	0.00175935	0.0296914
Slc35f3	787.959	-0.248605	0.0659287	-3.77082	0.00016271	0.00456416
Adra1a	301.45	-0.249728	0.0754446	-3.31008	0.000932701	0.0185217
Alox8	281.146	-0.250382	0.0794619	-3.15097	0.00162731	0.0281058
Car7	295.663	-0.250385	0.0702002	-3.56673	0.000361465	0.00865526
Htr7	599.226	-0.250397	0.05834	-4.29204	1.77e-05	0.000706542
Kcnk3	883.322	-0.251092	0.0520983	-4.81959	1.44e-06	7.77e-05
P2rx6	460.206	-0.251163	0.0664417	-3.78021	0.000156698	0.00441312
Flrt2	585.149	-0.251416	0.059259	-4.24266	2.21e-05	0.000856688
Anxa6	4682.22	-0.251745	0.047525	-5.29711	1.18e-07	8.45e-06
Kcnab1	3360.74	-0.251846	0.0494064	-5.09743	3.44e-07	2.2e-05
Acy3	227.367	-0.252862	0.0826306	-3.06015	0.00221224	0.0350775
Caln1	1520.2	-0.252931	0.0784865	-3.22261	0.0012703	0.0233198
Lcp1	1035.53	-0.254001	0.0661808	-3.83798	0.000124052	0.00364047
P2rx5	386.963	-0.254667	0.0625986	-4.06825	4.74e-05	0.00166867
Acly	11839.9	-0.255031	0.053212	-4.79274	1.65e-06	8.77e-05
Rcor2	189.065	-0.256446	0.0769305	-3.33347	0.000857687	0.0174301
Cpne6	1942.1	-0.256738	0.0522085	-4.91755	8.76e-07	4.99e-05
Kcnc3	17027.2	-0.256857	0.0579953	-4.42893	9.47e-06	0.000410675
Olfr287	337.382	-0.257281	0.0733832	-3.50599	0.000454918	0.0103814
Pacsin3	1184.18	-0.258005	0.0557342	-4.62921	3.67e-06	0.000177847
Aox4	33.2878	-0.258857	0.0841827	-3.07494	0.00210546	0.0339459
Ppp1r1b	1224.52	-0.261115	0.0600857	-4.3457	1.39e-05	0.000572013
Smco3	289.708	-0.262152	0.0765157	-3.42612	0.000612272	0.0132426
Cdh22	1077.59	-0.262941	0.05963	-4.40954	1.04e-05	0.000444545
Calb2	3719.7	-0.26467	0.0666361	-3.97186	7.13e-05	0.00231934
Tfrc	3397.69	-0.265201	0.0673973	-3.9349	8.32e-05	0.00263443
Hr	1635.64	-0.265266	0.069186	-3.8341	0.000126025	0.00369021
Impdh1	1347.42	-0.265529	0.0462863	-5.73667	9.66e-09	8.58e-07
H1f2	301.264	-0.270104	0.0770983	-3.50337	0.000459416	0.0104552
Trhr	286.896	-0.270421	0.0850009	-3.18138	0.00146574	0.026124
Mccc1os	111.46	-0.270776	0.0880481	-3.07532	0.00210279	0.0339459
Hhipl1	269.292	-0.272347	0.0697987	-3.9019	9.54e-05	0.00295296
Robo4	281.829	-0.273591	0.0691793	-3.95481	7.66e-05	0.00245731
Clvs1	1761.55	-0.277351	0.0508211	-5.45741	4.83e-08	3.68e-06
Rimkla	2792.31	-0.278216	0.0495059	-5.61985	1.91e-08	1.56e-06
Fam135b	558.48	-0.278249	0.0812845	-3.42314	0.000619013	0.0133691
Slc35d3	236.378	-0.279022	0.0765902	-3.64305	0.000269423	0.00686946
Hsd11b1	629.057	-0.279228	0.0819386	-3.40777	0.000654966	0.0139271
Lsm11	1354.06	-0.280725	0.0463315	-6.05906	1.37e-09	1.48e-07
Ccdc92	4056.09	-0.281122	0.0388733	-7.23176	4.77e-13	9.49e-11
A2ml1	113.674	-0.28116	0.0860581	-3.26709	0.00108659	0.0208267
Galnt9	1520.59	-0.281323	0.0522384	-5.38538	7.23e-08	5.33e-06
Gna14	150.945	-0.282794	0.092053	-3.07208	0.00212572	0.0341313
Ccdc85c	2335.72	-0.282938	0.0437971	-6.46021	1.05e-10	1.44e-08
Tmprss5	720.669	-0.284235	0.0808638	-3.51498	0.000439779	0.0101057
Vsx2	171.96	-0.284497	0.0816809	-3.48303	0.000495778	0.0111597
Ifitm10	1105.74	-0.284795	0.0551534	-5.1637	2.42e-07	1.6e-05
Patj	2288.09	-0.285151	0.0465121	-6.13067	8.75e-10	9.77e-08
Etnppl	1112.73	-0.28663	0.0906944	-3.1604	0.00157554	0.0276156
Atp1a1	10632.8	-0.289675	0.054218	-5.34278	9.15e-08	6.69e-06
Lhx3	50.5749	-0.29085	0.092329	-3.15014	0.0016319	0.0281249
Nkx2-9	147.355	-0.291374	0.0916349	-3.17973	0.00147412	0.0262451
Rab3b	636.471	-0.293346	0.0566569	-5.17759	2.25e-07	1.52e-05
A730020M07Rik	93.394	-0.295169	0.0919838	-3.20892	0.00133232	0.0242163
Gm16596	800.627	-0.295741	0.0684189	-4.3225	1.54e-05	0.000623201
Mmp15	1481.32	-0.296083	0.0579264	-5.11137	3.2e-07	2.07e-05
Cfap99	77.4457	-0.298215	0.0905424	-3.29365	0.000988972	0.0193142
Hoxd8	885.839	-0.298763	0.0865786	-3.45077	0.000558988	0.0122785
Kcnk9	4237.41	-0.298808	0.0600166	-4.97875	6.4e-07	3.8e-05
Nrg1	1167.82	-0.302676	0.0541876	-5.5857	2.33e-08	1.85e-06
Fgf1	7506.7	-0.302996	0.0667561	-4.53885	5.66e-06	0.000266237
Itpr3	583.068	-0.303138	0.0790704	-3.83377	0.000126193	0.00369021
Chrm2	619.108	-0.305136	0.0700491	-4.35603	1.32e-05	0.000547056
Gstm7	1260.02	-0.305647	0.0537374	-5.68778	1.29e-08	1.11e-06
1110008P14Rik	1326.75	-0.308539	0.0526258	-5.86289	4.55e-09	4.27e-07
Dhcr24	5438.77	-0.309101	0.043807	-7.05599	1.71e-12	3.11e-10
Lingo4	936.46	-0.311664	0.073807	-4.22269	2.41e-05	0.000921126
Prss12	262.128	-0.314679	0.0739569	-4.2549	2.09e-05	0.000820788
Tmem63c	1301.49	-0.317288	0.0476635	-6.65685	2.8e-11	4.36e-09
1700040D17Rik	367.552	-0.31733	0.0682967	-4.64634	3.38e-06	0.000166752
Trim17	181.608	-0.317346	0.0818783	-3.87582	0.000106266	0.00322151
Hebp2	432.321	-0.317394	0.067626	-4.69337	2.69e-06	0.0001362
Ism1	78.6554	-0.319767	0.0914358	-3.49718	0.000470208	0.0106568
Eml1	4420.13	-0.320052	0.0630338	-5.07747	3.82e-07	2.4e-05
Pkd2l1	447.239	-0.320404	0.0891022	-3.59592	0.000323248	0.00793567
Cdh6	794.197	-0.321349	0.0653896	-4.91438	8.91e-07	5.04e-05
Stk32a	813.708	-0.32299	0.0849224	-3.80336	0.000142748	0.00407336
Syndig1l	439.673	-0.323696	0.0642742	-5.03617	4.75e-07	2.92e-05
H2bc6	148.108	-0.324053	0.0909419	-3.5633	0.000366221	0.00873118
Kcns3	552.2	-0.326005	0.0552505	-5.9005	3.62e-09	3.54e-07
Nphs1	27.2208	-0.328027	0.0841943	-3.89607	9.78e-05	0.00300802
Arhgap36	850.083	-0.330459	0.0799789	-4.13182	3.6e-05	0.00131476
Vdr	115.652	-0.331435	0.0910027	-3.64204	0.00027049	0.00688604
Grid2ip	412.32	-0.335119	0.067465	-4.9673	6.79e-07	3.98e-05
Prph	1423.93	-0.335149	0.0919337	-3.64555	0.000266819	0.00681357
Vwa7	717.09	-0.336461	0.0634775	-5.30048	1.15e-07	8.33e-06
Layn	177.601	-0.338443	0.087486	-3.86854	0.00010949	0.00330828
Arl16	653.544	-0.339585	0.0603866	-5.62352	1.87e-08	1.55e-06
Lrrc49	3036.42	-0.341598	0.0493027	-6.92858	4.25e-12	7.55e-10
Plxdc1	658.035	-0.345081	0.0560108	-6.16097	7.23e-10	8.24e-08
Chat	735.256	-0.346096	0.0846256	-4.08973	4.32e-05	0.00154116
Pcyt1b	2377	-0.347557	0.0434324	-8.00224	1.22e-15	3.2e-13
Palm3	251.267	-0.3557	0.0822345	-4.32544	1.52e-05	0.000616455
Lgr6	167.267	-0.355964	0.0841194	-4.23165	2.32e-05	0.00088722
Ankrd35	918.66	-0.363842	0.055335	-6.57525	4.86e-11	7.1e-09
Polr3g	254.14	-0.365006	0.0791532	-4.61138	4e-06	0.000191559
Sh3bgr	520.762	-0.368343	0.0771803	-4.7725	1.82e-06	9.57e-05
Glyat	51.9472	-0.374746	0.0922926	-4.06041	4.9e-05	0.00171839
Calcb	147.787	-0.375654	0.0920411	-4.08137	4.48e-05	0.00159074
Tpd52l1	376.229	-0.37965	0.0676665	-5.6106	2.02e-08	1.62e-06
Kcng4	2836.37	-0.380579	0.0754708	-5.04273	4.59e-07	2.83e-05
Mrvi1	248.585	-0.383754	0.0863767	-4.44279	8.88e-06	0.000389966
Uts2b	71.7595	-0.38689	0.0919868	-4.20593	2.6e-05	0.000983025
Mest	605.594	-0.388977	0.0551015	-7.05929	1.67e-12	3.07e-10
Npb	59.9155	-0.391996	0.0922456	-4.24949	2.14e-05	0.000834914
Tacr1	443.794	-0.396999	0.0594158	-6.68171	2.36e-11	3.75e-09
Lhx4	67.815	-0.407595	0.0911363	-4.47237	7.74e-06	0.00034357
Itih3	3957.39	-0.410738	0.07112	-5.77528	7.68e-09	6.97e-07
Dffa	2456.28	-0.421397	0.0618017	-6.81853	9.2e-12	1.58e-09
Susd2	1902.72	-0.423458	0.0534659	-7.92014	2.37e-15	6.02e-13
Mnx1	37.3289	-0.424382	0.0903515	-4.69701	2.64e-06	0.000135003
Aqp6	69.434	-0.425959	0.0921795	-4.62097	3.82e-06	0.000184521
Tesc	427.611	-0.432802	0.0729924	-5.9294	3.04e-09	3.04e-07
Fxyd7	1021.23	-0.4357	0.060339	-7.22086	5.17e-13	1.02e-10
Slco4a1	191.987	-0.437966	0.0845726	-5.17859	2.24e-07	1.52e-05
Kirrel2	114.666	-0.467047	0.0918478	-5.08501	3.68e-07	2.33e-05
Pdgfd	666.541	-0.471472	0.0687165	-6.86112	6.83e-12	1.19e-09
Slc18a3	1169.78	-0.487295	0.0759145	-6.41899	1.37e-10	1.83e-08
Nefl	47471.9	-0.497544	0.05662	-8.78742	1.53e-18	5.16e-16
Grin3b	260.858	-0.515788	0.0832358	-6.19671	5.77e-10	6.76e-08
Nefm	43689	-0.518644	0.0660714	-7.84975	4.17e-15	1.01e-12
Rspo2	179.149	-0.520729	0.0882253	-5.90227	3.59e-09	3.53e-07
Vipr2	127.659	-0.541534	0.09199	-5.88688	3.94e-09	3.8e-07
Slc10a4	479.569	-0.567703	0.0838585	-6.76978	1.29e-11	2.1e-09
Nefh	24729.6	-0.582775	0.0668177	-8.72187	2.74e-18	9.04e-16
A230070E04Rik	13275.5	-0.598977	0.0581454	-10.3014	6.95e-25	3.19e-22
Kcnj14	486.893	-0.64979	0.0869556	-7.47267	7.86e-14	1.63e-11
Mmp9	270.23	-0.741697	0.0800869	-9.26116	2.02e-20	7.42e-18
Chodl	483.172	-1.27548	0.0841214	-15.1623	6.28e-52	1.73e-48

## Sheet: Up_degs
GeneID	Base mean	log2FC	StdErr	Wald-Stats	P-value	P-adj
Itgax	78.2734	1.58357	0.0923031	17.1562	5.64e-66	4.66e-62
Serpina3n	2582.99	1.44345	0.0549314	26.2773	3.48e-152	5.75e-148
Clec7a	105.06	1.37481	0.0922668	14.9003	3.28e-50	6.77e-47
Gpnmb	182.754	1.3378	0.0890405	15.0246	5.07e-51	1.2e-47
Lpl	367.532	1.27789	0.0831916	15.3608	3e-53	9.91e-50
Atf3	85.2104	1.15901	0.0923499	12.5502	3.96e-36	4.68e-33
Cd68	270.511	1.14652	0.0775899	14.7766	2.07e-49	3.8e-46
C4b	4742.83	1.12883	0.0689009	16.3834	2.51e-60	1.38e-56
Ccl3	34.8519	1.01654	0.0881163	11.5363	8.65e-31	7.94e-28
Mpeg1	1272.26	1.00668	0.0639322	15.746	7.32e-56	3.02e-52
Lgals3	226.296	0.997318	0.0922518	10.8108	3.06e-27	1.81e-24
Tyrobp	441.392	0.99546	0.0715228	13.9181	4.92e-44	7.39e-41
Timp1	51.0925	0.979297	0.0922074	10.6206	2.39e-26	1.27e-23
Cst7	32.4717	0.977852	0.0850981	11.4909	1.47e-30	1.21e-27
C3ar1	92.6712	0.921573	0.088686	10.3914	2.71e-25	1.32e-22
Sprr1a	45.7677	0.90726	0.0844405	10.7444	6.3e-27	3.47e-24
Fcrls	533.026	0.869685	0.0785716	11.0687	1.78e-28	1.28e-25
Itgb2	273.42	0.855079	0.0778134	10.9888	4.32e-28	2.98e-25
Mmp12	24.0034	0.844555	0.0797188	10.5942	3.17e-26	1.64e-23
Ly86	339.611	0.842019	0.0776774	10.8399	2.23e-27	1.41e-24
Ccl6	76.8818	0.824863	0.0922168	8.94482	3.73e-19	1.28e-16
Ptprc	183.799	0.808475	0.0861402	9.38557	6.26e-21	2.4e-18
Osmr	226.749	0.806039	0.0793631	10.1564	3.1e-24	1.35e-21
Cd84	124.57	0.801352	0.0861023	9.30698	1.32e-20	4.94e-18
Myo1f	157.904	0.79242	0.0864102	9.17044	4.71e-20	1.69e-17
Lag3	205.102	0.788025	0.0819262	9.61872	6.67e-22	2.69e-19
S100a6	586.398	0.776424	0.0893057	8.694	3.5e-18	1.11e-15
C1qc	1225.44	0.758279	0.0576392	13.1556	1.58e-39	2.18e-36
Cd180	119.922	0.757785	0.0910024	8.32709	8.29e-17	2.36e-14
Cd109	179.423	0.74845	0.0858698	8.7161	2.88e-18	9.33e-16
Trem2	328.329	0.744837	0.0764893	9.7378	2.08e-22	8.59e-20
Nckap1l	375.838	0.741185	0.0635908	11.6555	2.15e-31	2.22e-28
C1qb	1442.5	0.727072	0.0571008	12.7331	3.87e-37	4.92e-34
Ccl9	60.0593	0.721464	0.0921491	7.82931	4.91e-15	1.16e-12
Fcgr2b	97.2024	0.716888	0.0905332	7.91851	2.4e-15	6.02e-13
Olfml3	671.942	0.709227	0.0686563	10.3301	5.15e-25	2.43e-22
C1qa	1516.38	0.694159	0.0612729	11.329	9.43e-30	7.42e-27
Grn	1578.26	0.679239	0.0485206	13.999	1.58e-44	2.61e-41
Laptm5	1033.44	0.670594	0.0582089	11.5205	1.04e-30	9.05e-28
Slc11a1	104.807	0.659881	0.0918428	7.18489	6.73e-13	1.29e-10
Cd52	72.862	0.658182	0.0908608	7.24385	4.36e-13	8.79e-11
S1pr3	238.489	0.656861	0.0838257	7.83603	4.65e-15	1.11e-12
Csf3r	304.311	0.655977	0.0786178	8.34387	7.19e-17	2.08e-14
Ctss	2520.75	0.642698	0.0586859	10.9515	6.54e-28	4.32e-25
Fyb	188.961	0.642331	0.0803355	7.99561	1.29e-15	3.33e-13
Plek	496.983	0.635827	0.0607081	10.4735	1.14e-25	5.72e-23
Ggta1	176.024	0.63563	0.0850682	7.472	7.9e-14	1.63e-11
Fcer1g	179.382	0.627396	0.0829462	7.56388	3.91e-14	8.5e-12
Ctsz	1351.78	0.62661	0.0614903	10.1904	2.19e-24	9.77e-22
Rasal3	124.837	0.625183	0.0845149	7.39731	1.39e-13	2.83e-11
Dock2	182.069	0.623155	0.082768	7.52895	5.12e-14	1.1e-11
Capg	156.943	0.622999	0.0906844	6.86997	6.42e-12	1.13e-09
Itga5	114.657	0.603333	0.0917814	6.57359	4.91e-11	7.12e-09
Fcgr3	315.59	0.593936	0.0775847	7.65532	1.93e-14	4.36e-12
Slc14a1	1035.63	0.592945	0.0513974	11.5365	8.64e-31	7.94e-28
Irf8	187.404	0.591852	0.0893268	6.62569	3.46e-11	5.24e-09
Cyba	126.152	0.58995	0.0865652	6.8151	9.42e-12	1.6e-09
Cd9	1488.6	0.586362	0.0710169	8.25665	1.5e-16	4.2e-14
Hexb	3074.79	0.586196	0.0541849	10.8184	2.82e-27	1.72e-24
Plau	86.1361	0.582605	0.092307	6.3116	2.76e-10	3.46e-08
Cd22	21.0395	0.579878	0.085663	6.7693	1.29e-11	2.1e-09
Top2a	57.3601	0.579425	0.0904511	6.40594	1.49e-10	1.98e-08
Cybb	50.7359	0.577121	0.0898817	6.42089	1.35e-10	1.83e-08
Hk2	136.73	0.575506	0.0862444	6.67297	2.51e-11	3.94e-09
Tlr7	98.1584	0.571113	0.0902968	6.32483	2.54e-10	3.22e-08
Aspg	154.947	0.570898	0.0889373	6.4191	1.37e-10	1.83e-08
Lyz2	527.428	0.569215	0.0903713	6.29863	3e-10	3.7e-08
Naip2	58.7197	0.567968	0.0922104	6.15948	7.3e-10	8.26e-08
Ccl4	14.0602	0.565645	0.0754098	7.50095	6.34e-14	1.34e-11
Lilrb4a	34.3373	0.565326	0.0809736	6.98161	2.92e-12	5.24e-10
Bcl3	48.9919	0.563713	0.0904624	6.23146	4.62e-10	5.49e-08
Slamf9	35.7435	0.563234	0.0911887	6.17658	6.55e-10	7.57e-08
Pik3ap1	137.475	0.557152	0.084119	6.62337	3.51e-11	5.27e-09
P2ry6	62.7859	0.555616	0.0920835	6.03383	1.6e-09	1.71e-07
Ptx3	30.063	0.555161	0.085001	6.53122	6.52e-11	9.13e-09
Hcls1	156.97	0.553871	0.0871577	6.35482	2.09e-10	2.71e-08
Aldh1l2	713.028	0.551783	0.0710023	7.77134	7.77e-15	1.81e-12
Adgre1	143.937	0.551233	0.0870127	6.33509	2.37e-10	3.06e-08
Cebpd	84.1699	0.551167	0.0923137	5.97058	2.36e-09	2.41e-07
Spi1	83.4145	0.551024	0.0890938	6.18476	6.22e-10	7.24e-08
A2m	2868.42	0.549036	0.087477	6.27635	3.47e-10	4.24e-08
Ccn1	138.875	0.546711	0.0922351	5.92737	3.08e-09	3.06e-07
Itgam	756.776	0.544137	0.0570511	9.53771	1.46e-21	5.74e-19
Flnc	997.517	0.542601	0.0923552	5.87516	4.22e-09	4.03e-07
Tent5c	61.9422	0.542213	0.0918636	5.90237	3.58e-09	3.53e-07
Pdpn	219.534	0.540526	0.0823994	6.55982	5.39e-11	7.74e-09
Vav1	123.474	0.54023	0.0838151	6.44549	1.15e-10	1.57e-08
Arpc1b	596.808	0.53677	0.0751774	7.14005	9.33e-13	1.77e-10
Cd14	88.0936	0.535569	0.0908881	5.89262	3.8e-09	3.69e-07
S100a4	47.5245	0.533896	0.0880198	6.06563	1.31e-09	1.43e-07
Csf1r	3041.39	0.533111	0.0493906	10.7938	3.68e-27	2.1e-24
Elf4	57.3433	0.532005	0.0922229	5.76869	7.99e-09	7.21e-07
Cyth4	320.1	0.531702	0.0785489	6.76906	1.3e-11	2.1e-09
Tlr2	140.947	0.529934	0.0880626	6.0177	1.77e-09	1.85e-07
Vim	2602.14	0.529618	0.090921	5.82504	5.71e-09	5.27e-07
Bin2	165.673	0.523329	0.0820708	6.37655	1.81e-10	2.37e-08
Slc15a3	129.449	0.522333	0.0825062	6.33084	2.44e-10	3.12e-08
Tmem176a	410.704	0.521914	0.0797781	6.54207	6.07e-11	8.57e-09
Ctsh	366.3	0.521506	0.0855168	6.09828	1.07e-09	1.18e-07
Crym	20.6914	0.518671	0.0834867	6.21262	5.21e-10	6.15e-08
Blnk	61.1277	0.518467	0.0923303	5.61535	1.96e-08	1.6e-06
Stbd1	80.3938	0.517503	0.0914765	5.65722	1.54e-08	1.31e-06
D17H6S56E-5	82.8882	0.517077	0.0916376	5.64263	1.67e-08	1.41e-06
Pld4	323.744	0.516732	0.0778306	6.63919	3.15e-11	4.87e-09
Tmem176b	875.774	0.51569	0.0601414	8.57463	9.94e-18	3.1e-15
Gpr84	35.3437	0.515227	0.0913693	5.63895	1.71e-08	1.43e-06
Ikzf1	121.871	0.515224	0.0854934	6.02647	1.68e-09	1.76e-07
Tlr13	79.373	0.511001	0.0907295	5.63215	1.78e-08	1.49e-06
Ctsc	295.347	0.51026	0.0834213	6.11666	9.56e-10	1.06e-07
Ggt5	166.392	0.504825	0.0894689	5.64246	1.68e-08	1.41e-06
Cd86	58.4744	0.503631	0.0919903	5.47482	4.38e-08	3.35e-06
Rbp1	222.805	0.502262	0.0922688	5.44347	5.23e-08	3.92e-06
Ppl	28.3582	0.501871	0.0844555	5.94243	2.81e-09	2.85e-07
Ptpn6	155.094	0.501457	0.0825477	6.07476	1.24e-09	1.36e-07
Ctsd	14100.3	0.500615	0.0444354	11.2661	1.93e-29	1.45e-26
Dhrs1	2267.29	0.500472	0.0546545	9.15701	5.34e-20	1.88e-17
Anxa3	315.491	0.497393	0.0733084	6.78494	1.16e-11	1.96e-09
Hmox1	185.177	0.497043	0.0749092	6.63528	3.24e-11	4.95e-09
Arhgap25	81.7569	0.495892	0.0910254	5.44784	5.1e-08	3.85e-06
Arhgap45	308.831	0.4945	0.0816525	6.05615	1.39e-09	1.5e-07
Arhgdib	169.33	0.490021	0.0793617	6.17452	6.64e-10	7.61e-08
Inpp5d	380.393	0.487096	0.0620214	7.85369	4.04e-15	9.96e-13
Lat2	111.049	0.485569	0.0853427	5.68964	1.27e-08	1.1e-06
Aif1	110.625	0.483806	0.0877724	5.51205	3.55e-08	2.74e-06
Ncf1	209.996	0.48294	0.0829754	5.82028	5.88e-09	5.39e-07
Hpgd	250.842	0.478983	0.0799302	5.99251	2.07e-09	2.13e-07
Cd53	170.164	0.477421	0.083522	5.71612	1.09e-08	9.53e-07
Cx3cr1	1278.33	0.476818	0.0582303	8.1885	2.65e-16	7.16e-14
Cd63	1284.13	0.476478	0.0617252	7.71935	1.17e-14	2.68e-12
Cd300c2	89.9335	0.476382	0.0908402	5.24418	1.57e-07	1.1e-05
Ssc5d	162.469	0.474139	0.090481	5.2402	1.6e-07	1.12e-05
Hk3	73.6968	0.472003	0.0905391	5.21325	1.86e-07	1.27e-05
Runx1	51.8067	0.47101	0.0911339	5.16832	2.36e-07	1.57e-05
Emp3	81.8708	0.470739	0.0923435	5.0977	3.44e-07	2.2e-05
Egr1	810.932	0.4699	0.0664718	7.06916	1.56e-12	2.89e-10
Csf2rb	54.7706	0.468427	0.0921403	5.08385	3.7e-07	2.33e-05
Casp12	86.4923	0.46387	0.0923406	5.02347	5.07e-07	3.09e-05
Capn3	140.431	0.461893	0.0833076	5.54444	2.95e-08	2.3e-06
Lcp2	78.5228	0.459463	0.0891877	5.15164	2.58e-07	1.7e-05
Tagln2	419.274	0.459026	0.0809882	5.66781	1.45e-08	1.24e-06
Ifi30	99.9646	0.456528	0.0890635	5.12586	2.96e-07	1.93e-05
Siglecf	28.2494	0.455145	0.0861504	5.28314	1.27e-07	9.04e-06
Hspb1	619.413	0.454681	0.0779303	5.83446	5.4e-09	5.01e-07
Cd44	510.529	0.454622	0.0922146	4.93004	8.22e-07	4.73e-05
Fos	367.61	0.45281	0.0763649	5.92955	3.04e-09	3.04e-07
Dock8	185.825	0.452449	0.081522	5.55002	2.86e-08	2.24e-06
Tifab	93.5689	0.447736	0.0900063	4.9745	6.54e-07	3.87e-05
Emp1	215.346	0.446876	0.0899027	4.97066	6.67e-07	3.94e-05
Hck	80.6225	0.445341	0.0899827	4.94919	7.45e-07	4.34e-05
Socs3	91.1498	0.443032	0.088907	4.9831	6.26e-07	3.73e-05
Sash3	59.5733	0.442631	0.0918291	4.82016	1.43e-06	7.77e-05
Bcl2a1b	22.1251	0.441253	0.0859691	5.13269	2.86e-07	1.87e-05
Naip5	60.0144	0.440402	0.0916384	4.80587	1.54e-06	8.29e-05
Col27a1	702.406	0.440054	0.0749129	5.87421	4.25e-09	4.03e-07
Lyn	201.472	0.439534	0.0801066	5.48686	4.09e-08	3.14e-06
Csf2rb2	39.8111	0.439084	0.0909162	4.82955	1.37e-06	7.44e-05
Gfap	56289.5	0.436406	0.0908255	4.80488	1.55e-06	8.31e-05
Pdlim4	250.918	0.435501	0.0776334	5.60971	2.03e-08	1.63e-06
Ly9	22.9254	0.430996	0.0849167	5.07551	3.86e-07	2.42e-05
Fgf21	12.2514	0.430449	0.065702	6.55155	5.69e-11	8.11e-09
Tgfbr1	949.196	0.429835	0.0521552	8.24147	1.7e-16	4.68e-14
Spint1	37.6634	0.429741	0.0899714	4.77642	1.78e-06	9.42e-05
Tbxas1	85.4201	0.427974	0.090399	4.73428	2.2e-06	0.000114579
Rac2	87.7291	0.426957	0.0909533	4.69424	2.68e-06	0.000136038
Fcgr1	88.7467	0.426717	0.0891125	4.78851	1.68e-06	8.93e-05
Tnfrsf1a	568.17	0.424833	0.0598416	7.09929	1.25e-12	2.35e-10
Mki67	66.8478	0.424089	0.0868294	4.88416	1.04e-06	5.8e-05
Unc93b1	477.353	0.424007	0.0671772	6.31177	2.76e-10	3.46e-08
Cd37	97.938	0.421537	0.087203	4.83398	1.34e-06	7.3e-05
Arhgap30	129.791	0.421118	0.0834534	5.04614	4.51e-07	2.8e-05
Sulf1	533.441	0.417711	0.0633186	6.59697	4.2e-11	6.19e-09
Ccn5	23.2481	0.417178	0.0709319	5.88139	4.07e-09	3.91e-07
Ctsl	2671.5	0.416241	0.041751	9.96959	2.07e-23	8.77e-21
Fabp7	743.646	0.414652	0.0740923	5.59642	2.19e-08	1.75e-06
Fmo1	122.567	0.413524	0.091743	4.50742	6.56e-06	0.000301161
Gusb	555.814	0.413402	0.0545549	7.57773	3.52e-14	7.75e-12
Clic1	279.667	0.41271	0.08447	4.88588	1.03e-06	5.77e-05
Lgals3bp	810.596	0.412671	0.0719038	5.7392	9.51e-09	8.5e-07
Cd33	143.4	0.410592	0.0859402	4.77764	1.77e-06	9.39e-05
Palld	326.225	0.41043	0.0731034	5.61438	1.97e-08	1.6e-06
Tgm1	17.0055	0.409872	0.0740035	5.53855	3.05e-08	2.37e-06
Cxcl16	94.9249	0.405249	0.091224	4.44235	8.9e-06	0.000389966
Fblim1	81.8292	0.404294	0.0915678	4.41524	1.01e-05	0.000435253
Pcdhgc5	295.114	0.403712	0.0870754	4.63635	3.55e-06	0.00017283
Pycard	61.6842	0.402432	0.0920006	4.37423	1.22e-05	0.000507655
Xpo1	2578.09	0.40032	0.0494337	8.09812	5.58e-16	1.49e-13
Hpgds	162.402	0.399175	0.0825265	4.83692	1.32e-06	7.21e-05
Ednrb	2351.19	0.397057	0.0692261	5.73565	9.71e-09	8.58e-07
Npnt	167.582	0.396523	0.0842336	4.70742	2.51e-06	0.000129934
Car5b	222.51	0.3963	0.0832642	4.75955	1.94e-06	0.00010177
Sel1l3	981.892	0.395875	0.046548	8.50466	1.82e-17	5.57e-15
Pik3cg	112.264	0.395091	0.0863614	4.57485	4.77e-06	0.000227564
Apbb1ip	175.696	0.391429	0.088791	4.40843	1.04e-05	0.000445669
Ccdc190	408.236	0.389782	0.0737432	5.28567	1.25e-07	8.96e-06
Lair1	268.336	0.389359	0.0680621	5.72064	1.06e-08	9.33e-07
Cd48	22.4025	0.389094	0.0827162	4.70396	2.55e-06	0.000131741
C5ar1	24.228	0.388817	0.0872467	4.45653	8.33e-06	0.00036896
Iqgap3	25.714	0.385546	0.0829809	4.6462	3.38e-06	0.000166752
Parvg	94.0164	0.381952	0.0916105	4.1693	3.06e-05	0.00113952
Glipr2	265.972	0.37843	0.083017	4.55846	5.15e-06	0.000243945
Met	177.425	0.377689	0.0827749	4.56284	5.05e-06	0.000239601
S100a11	123.64	0.376137	0.0922113	4.07908	4.52e-05	0.00160307
P4ha3	457.329	0.374558	0.0773554	4.84204	1.29e-06	7.05e-05
Plcg2	191.597	0.373617	0.0747215	5.00013	5.73e-07	3.44e-05
B4galt1	171.401	0.372173	0.0831007	4.47858	7.51e-06	0.000335534
Apobec1	83.3479	0.372131	0.0920746	4.04162	5.31e-05	0.00182749
Mlxipl	141.353	0.371724	0.0849581	4.37538	1.21e-05	0.000507044
Il10ra	210.326	0.370487	0.0803104	4.61319	3.97e-06	0.000191011
Ms4a6c	26.2698	0.369844	0.0832978	4.44002	9e-06	0.000393163
Fes	149.864	0.369449	0.0839902	4.39871	1.09e-05	0.000462508
Tec	93.4865	0.369322	0.0923556	3.99891	6.36e-05	0.00212399
F11r	278.097	0.368881	0.0698932	5.27779	1.31e-07	9.27e-06
Ch25h	24.8158	0.368491	0.0784273	4.69851	2.62e-06	0.000134467
Syk	128.523	0.368077	0.0912124	4.03538	5.45e-05	0.00186477
Fermt3	180.517	0.36655	0.0817065	4.48618	7.25e-06	0.000327338
Lsp1	104.745	0.36507	0.0908179	4.0198	5.82e-05	0.00198018
Prss23	202.972	0.364582	0.0859683	4.24089	2.23e-05	0.000861463
Slc5a3	1128.99	0.364105	0.0551818	6.59827	4.16e-11	6.19e-09
Slc43a3	45.3293	0.362563	0.0861958	4.20627	2.6e-05	0.000983025
Trib1	227.728	0.361899	0.0826633	4.37799	1.2e-05	0.00050228
Gpr183	31.7137	0.361609	0.0893273	4.04813	5.16e-05	0.00178452
Tlr1	25.1174	0.361183	0.0837287	4.31373	1.61e-05	0.000645294
Plin2	429.57	0.360626	0.0708869	5.08734	3.63e-07	2.31e-05
Zmynd15	46.9066	0.358726	0.0920597	3.89666	9.75e-05	0.00300625
C3	2967.72	0.357709	0.08943	3.99988	6.34e-05	0.0021238
Mdfic	90.2279	0.35768	0.089869	3.98001	6.89e-05	0.00226353
Csf1	1580.02	0.355093	0.0589073	6.028	1.66e-09	1.76e-07
Tnfrsf1b	185.743	0.35492	0.0766266	4.63181	3.62e-06	0.000176142
Ifi204	20.266	0.35475	0.0798124	4.4448	8.8e-06	0.000387596
Sbno2	781.616	0.353095	0.0703113	5.02187	5.12e-07	3.11e-05
Klhl6	82.4184	0.352598	0.0914159	3.85708	0.000114752	0.00342226
Stat6	292.177	0.351014	0.0811123	4.3275	1.51e-05	0.000612208
Renbp	123.677	0.350328	0.0915873	3.82507	0.000130737	0.00380288
Golm1	521.976	0.349915	0.0561412	6.23278	4.58e-10	5.49e-08
Ecm1	176.568	0.349574	0.0907649	3.85142	0.000117435	0.00348342
Ptgs1	339.048	0.349512	0.0832899	4.19633	2.71e-05	0.00102235
Gcnt1	74.551	0.349098	0.0909354	3.83897	0.000123552	0.00363225
Sgpl1	1193.85	0.348879	0.0414307	8.42079	3.74e-17	1.12e-14
Sspo	269.411	0.347852	0.0910459	3.82062	0.000133116	0.00385849
Clcf1	63.0089	0.347531	0.0923423	3.76351	0.000167546	0.00466811
Sh3bp2	204.092	0.347407	0.0860196	4.0387	5.37e-05	0.00184237
Gpr34	226.572	0.345949	0.0797645	4.33713	1.44e-05	0.000591816
Hbegf	449.968	0.34483	0.074777	4.61144	4e-06	0.000191559
Mylk	451.004	0.344691	0.0845486	4.07684	4.57e-05	0.00161168
Rab29	156.728	0.344333	0.0839885	4.09976	4.14e-05	0.00148544
Mvp	455.002	0.343942	0.070548	4.87529	1.09e-06	6.04e-05
Tnfrsf11b	93.3277	0.343701	0.0920577	3.73354	0.000188806	0.00515612
Hcar2	9.8253	0.343425	0.0685558	5.00942	5.46e-07	3.3e-05
Gch1	82.4325	0.342686	0.0912204	3.75669	0.000172177	0.00477301
Igsf1	453.096	0.342408	0.0912333	3.7531	0.00017466	0.00483372
Sp110	45.6616	0.342266	0.092331	3.70694	0.000209775	0.00559016
Tcirg1	668.754	0.342203	0.0547709	6.2479	4.16e-10	5.02e-08
B2m	2300.5	0.341601	0.0545335	6.26406	3.75e-10	4.56e-08
Serinc2	45.0865	0.341586	0.092031	3.71164	0.00020592	0.00554105
Itgb5	1804.45	0.341023	0.0473988	7.19477	6.26e-13	1.22e-10
Clu	17680.8	0.340458	0.0407473	8.35536	6.52e-17	1.92e-14
Dnase2a	121.002	0.340181	0.0822543	4.13573	3.54e-05	0.00129911
Tspo	126.101	0.340126	0.088295	3.85216	0.000117081	0.00347916
Apobr	45.7938	0.338542	0.0921824	3.67253	0.000240161	0.00623889
Itpripl2	282.814	0.336506	0.0844752	3.98349	6.79e-05	0.00224855
Fam102b	731.593	0.335687	0.0663262	5.06115	4.17e-07	2.6e-05
Steap3	158.278	0.335015	0.0868248	3.85852	0.000114078	0.0034083
Man2b1	1433.04	0.3348	0.0438004	7.64376	2.11e-14	4.71e-12
Nnat	2054.01	0.334759	0.0787047	4.25335	2.11e-05	0.00082256
Arhgef5	103.986	0.334599	0.0921876	3.62955	0.000283917	0.0071726
Fam129a	169.479	0.334511	0.092196	3.62826	0.000285341	0.00719758
Tead1	758.807	0.333069	0.0585156	5.69198	1.26e-08	1.09e-06
Fgfr4	26.919	0.332082	0.0796966	4.16683	3.09e-05	0.00114933
Ccr5	116.696	0.331917	0.0855285	3.88078	0.000104124	0.0031799
Themis2	39.0815	0.331827	0.0919835	3.60746	0.00030921	0.00769393
Treml2	14.3496	0.331779	0.0752162	4.41101	1.03e-05	0.000442693
Myom1	78.7091	0.330725	0.0900395	3.67311	0.000239619	0.00623562
Irf9	351.051	0.330209	0.0687861	4.80052	1.58e-06	8.46e-05
Tmem119	479.967	0.32972	0.0695349	4.74179	2.12e-06	0.000110757
Ltbr	340.215	0.32891	0.0727592	4.52052	6.17e-06	0.000285779
Trim14	36.8812	0.328827	0.091806	3.58176	0.000341286	0.00824374
Rcsd1	188.149	0.328737	0.0838842	3.91894	8.89e-05	0.00278833
Lpxn	35.7398	0.327836	0.0907419	3.61284	0.000302865	0.00759323
Hexa	1390.17	0.32588	0.0480715	6.77908	1.21e-11	2.02e-09
Cd34	735.786	0.325453	0.066491	4.89469	9.85e-07	5.53e-05
Havcr2	106.685	0.324773	0.0906201	3.5839	0.000338507	0.00821266
Plaur	20.9863	0.324265	0.0809149	4.00748	6.14e-05	0.00207779
Rnase4	328.546	0.323954	0.0764476	4.23759	2.26e-05	0.000869587
Selplg	745.471	0.323244	0.061932	5.21934	1.8e-07	1.25e-05
Slco2b1	702.374	0.322999	0.0695013	4.64738	3.36e-06	0.000166752
Sugct	90.064	0.322868	0.0884624	3.64978	0.000262469	0.00672328
Aqp4	16064.3	0.320825	0.0595532	5.3872	7.16e-08	5.3e-06
Tmc3	106.587	0.317642	0.0897474	3.53928	0.000401214	0.0094151
Thbs2	757.32	0.317424	0.082671	3.83961	0.00012323	0.00362925
Cebpa	205.324	0.317235	0.0869665	3.64779	0.000264507	0.006765
Gm45916	353.738	0.316955	0.0704343	4.50001	6.8e-06	0.000308431
Sting1	110.577	0.316893	0.0857988	3.69344	0.000221241	0.00583921
Ticam2	22.1695	0.316163	0.0814879	3.87988	0.000104508	0.00318575
Arl11	18.4162	0.316047	0.0784348	4.02943	5.59e-05	0.00190864
Ccdc162	121.475	0.315604	0.0882096	3.57788	0.000346386	0.0083304
Cyp4v3	247.424	0.315037	0.0727125	4.33264	1.47e-05	0.000599567
Tlr4	53.7528	0.314775	0.092302	3.41027	0.000648983	0.0138598
Cdsn	27.8465	0.31422	0.0824165	3.81258	0.000137522	0.00396534
Slc39a14	1187.41	0.313818	0.0522559	6.00541	1.91e-09	1.98e-07
Kcnk6	95.8993	0.313767	0.0901227	3.48155	0.000498513	0.0111756
Mmp19	192.965	0.313756	0.0850485	3.68914	0.00022501	0.00592425
Plscr2	107.248	0.313348	0.0889418	3.52307	0.000426577	0.00987101
Lix1	341.227	0.313186	0.0870291	3.59864	0.000319886	0.00787654
Rab32	58.2193	0.312514	0.091926	3.39963	0.000674773	0.0142348
Lpar5	21.0596	0.312263	0.0824649	3.78662	0.000152713	0.00432043
Grm2	126.491	0.312185	0.0902802	3.45796	0.000544278	0.0120705
Ncf2	142.043	0.312115	0.0871151	3.58279	0.000339945	0.00823544
Il1rn	6.90776	0.31141	0.0606706	5.1328	2.85e-07	1.87e-05
Ptafr	44.7863	0.310971	0.0923029	3.36903	0.000754344	0.0155596
Gfpt2	120.819	0.310275	0.0868437	3.5728	0.000353186	0.0084693
Endou	45.331	0.309403	0.0913197	3.38813	0.000703707	0.0146247
Il13ra1	187.47	0.308923	0.0782914	3.9458	7.95e-05	0.0025466
Il21r	57.9745	0.30889	0.0908674	3.39935	0.000675468	0.0142348
Myof	165.825	0.307658	0.0918201	3.35066	0.000806198	0.0165261
Lrrk1	182.022	0.307369	0.0886362	3.46776	0.000524812	0.0117175
Trim47	109.722	0.307251	0.0881715	3.48469	0.000492703	0.0111056
Tgfb1	141.485	0.307202	0.0825824	3.71995	0.000199266	0.00539289
Ccdc88b	171.973	0.307199	0.0801651	3.83208	0.000127066	0.00370261
Prelp	955.065	0.306401	0.076485	4.00603	6.17e-05	0.00208492
Milr1	33.8449	0.306393	0.0902671	3.3943	0.000688047	0.0144263
Itih5	2273.38	0.306291	0.0709391	4.31766	1.58e-05	0.000635463
Gmip	294.248	0.304908	0.0779453	3.91182	9.16e-05	0.00285017
Slc39a1	860.743	0.304476	0.0519058	5.86594	4.47e-09	4.22e-07
Slc7a8	551.274	0.304195	0.0541065	5.62215	1.89e-08	1.55e-06
S100a10	689.563	0.304138	0.066558	4.56952	4.89e-06	0.000232751
Ehd2	297.406	0.303989	0.0890975	3.41186	0.000645201	0.0138262
Adamtsl3	118.805	0.303891	0.0921448	3.29797	0.000973876	0.019087
Rhoc	380.23	0.303378	0.0707463	4.28825	1.8e-05	0.000715233
Ifi207	14.9503	0.303093	0.0761081	3.9824	6.82e-05	0.00224956
Slc16a6	806.454	0.302323	0.05796	5.21607	1.83e-07	1.26e-05
Rasl11a	35.3919	0.302203	0.090856	3.32617	0.00088048	0.017784
Cdk6	91.6509	0.301923	0.092122	3.27743	0.00104758	0.0201962
Cmtm7	49.9602	0.301799	0.0918391	3.28617	0.0010156	0.0197177
Pdcd1	10.397	0.301128	0.0643204	4.68168	2.85e-06	0.000143325
St8sia2	175.705	0.301074	0.0871203	3.45585	0.000548566	0.0121347
Nfam1	78.6434	0.300732	0.0906405	3.31786	0.000907106	0.0181663
Glis3	107.475	0.299846	0.0905138	3.31271	0.000923969	0.0184518
Prdx6	7155.16	0.299793	0.050161	5.97662	2.28e-09	2.34e-07
Arhgap4	156.275	0.299747	0.0865689	3.46253	0.000535123	0.0119155
Bst2	98.0974	0.298728	0.0921964	3.24012	0.00119479	0.0223054
Fxyd1	1033.8	0.296862	0.0685139	4.33287	1.47e-05	0.000599567
Rims4	267.955	0.296407	0.0914506	3.24117	0.00119039	0.0222736
Zfp185	35.5138	0.296345	0.0873868	3.39119	0.000695893	0.0145539
Axl	2149.21	0.295364	0.0454769	6.49482	8.31e-11	1.15e-08
Fgd2	143.857	0.294053	0.0844704	3.48114	0.000499292	0.0111779
Gna15	51.377	0.293933	0.0922195	3.18732	0.00143599	0.0257885
Masp1	491.1	0.293199	0.0628118	4.6679	3.04e-06	0.000151888
Ecel1	1176.24	0.291264	0.0645563	4.51178	6.43e-06	0.000296678
Stab1	494.99	0.290606	0.0841188	3.45471	0.000550889	0.0121682
Gpx8	94.6751	0.290533	0.0923274	3.14677	0.00165083	0.0282642
Adap2	159.634	0.289902	0.082206	3.52653	0.000421036	0.00979608
Shisal1	841.737	0.289684	0.0712655	4.06486	4.81e-05	0.00168952
Rgs1	9.06102	0.289317	0.0611942	4.72785	2.27e-06	0.000117896
Rnf122	245.595	0.286827	0.0773249	3.70937	0.000207774	0.00556843
Ftl1	5286.1	0.286477	0.0454624	6.30141	2.95e-10	3.66e-08
Plxnb2	2000.24	0.285968	0.0609548	4.69147	2.71e-06	0.000137053
Erbin	4530.61	0.285931	0.0426978	6.69662	2.13e-11	3.42e-09
Abca1	1331.33	0.28584	0.0632346	4.52031	6.17e-06	0.000285779
Synpo	643.959	0.285351	0.0633903	4.50149	6.75e-06	0.000307136
Rhoj	204.933	0.284907	0.0869637	3.27616	0.00105229	0.0202398
Acrbp	204.304	0.284443	0.0839096	3.38987	0.00069925	0.0145889
Lrrc3	195.329	0.284046	0.0838641	3.38697	0.000706681	0.0146497
Cchcr1	236.603	0.283631	0.0756863	3.74746	0.000178634	0.0049272
Mcm5	107.449	0.282967	0.0908602	3.11431	0.00184374	0.03077
Trim25	288.137	0.2826	0.0660702	4.27726	1.89e-05	0.000749654
Marcks	2047.16	0.281914	0.0659261	4.27621	1.9e-05	0.000751051
Neto2	951.969	0.281657	0.0677193	4.15919	3.19e-05	0.00117786
Ddr2	265.775	0.281426	0.0920093	3.05866	0.00222326	0.0352183
Ncf4	29.5518	0.281226	0.0871774	3.2259	0.00125577	0.0231587
Galnt15	331.358	0.280911	0.0891374	3.15143	0.0016247	0.0281058
Il6ra	122.653	0.280887	0.0865717	3.24456	0.00117634	0.0220798
Kank2	454.872	0.280801	0.0795782	3.52862	0.000417732	0.00974825
Fosl2	226.67	0.280537	0.0763769	3.67307	0.000239657	0.00623562
Slc13a3	761.853	0.280276	0.0838114	3.34413	0.00082541	0.016878
Gcnt2	306.926	0.280254	0.0887457	3.15794	0.00158888	0.02775
Bmp4	64.3582	0.279181	0.0899442	3.10394	0.00190964	0.0315826
Fbln2	157.707	0.2787	0.091202	3.05586	0.00224416	0.0354813
Lars2	1706.02	0.27805	0.0781121	3.55963	0.000371381	0.00884142
Cxcl10	25.096	0.277991	0.084369	3.29495	0.000984408	0.0192478
Mrps6	410.915	0.277386	0.0655093	4.2343	2.29e-05	0.00087887
Kctd11	102.169	0.2765	0.0865747	3.19378	0.00140425	0.0253286
Gfm2	1444.96	0.276112	0.0523616	5.27317	1.34e-07	9.47e-06
Casp1	53.8575	0.275796	0.092159	2.99261	0.00276605	0.0418504
Cybrd1	109.818	0.275666	0.0921117	2.99274	0.00276487	0.0418504
Plcb2	96.267	0.275137	0.0904925	3.04044	0.00236235	0.0369609
Ctsb	18714	0.275035	0.0235552	11.6762	1.69e-31	1.86e-28
Cnn3	3973.55	0.274585	0.0619875	4.42968	9.44e-06	0.00041033
Fgr	26.7937	0.274497	0.0876155	3.13298	0.00173043	0.0293232
Dna2	89.0109	0.274172	0.0896792	3.05726	0.00223373	0.0353502
Wdfy4	101.284	0.273886	0.0899958	3.04332	0.00233983	0.0366433
Was	41.8284	0.273002	0.0910043	2.99988	0.00270088	0.0409393
Nfya	431.104	0.272697	0.0642263	4.24588	2.18e-05	0.000846474
Naprt	210.027	0.272463	0.0737175	3.69604	0.000218987	0.00581658
Btk	42.8923	0.272411	0.0901182	3.02282	0.00250432	0.0387419
Tiam2	219.504	0.272283	0.075441	3.60922	0.000307123	0.00767154
Col5a3	590.174	0.271577	0.0853015	3.18373	0.00145391	0.0259973
Pla2g15	393.419	0.271416	0.0613987	4.42055	9.85e-06	0.000425816
Ildr2	1140.45	0.270271	0.0521921	5.17839	2.24e-07	1.52e-05
Smoc1	431.021	0.270266	0.0891097	3.03296	0.00242166	0.0376748
Neurl1b	47.7545	0.270112	0.0905217	2.98395	0.00284557	0.0425086
Mcm3	114.8	0.269995	0.0845239	3.1943	0.00140168	0.02531
Sla	79.8134	0.269961	0.0913353	2.95572	0.00311942	0.0456906
Bub1b	130.955	0.2697	0.0920667	2.92939	0.00339625	0.0486246
Dhrs3	258.415	0.268993	0.0750932	3.58212	0.000340823	0.00824374
Efemp2	413.121	0.268902	0.0693214	3.87907	0.000104858	0.00319055
Vamp8	200.989	0.268753	0.0787046	3.41471	0.000638511	0.0137126
Adgrg2	110.14	0.268526	0.0908316	2.95631	0.00311346	0.0456438
Slamf8	11.2563	0.268295	0.0720024	3.7262	0.000194388	0.00529107
Dab2	385.794	0.268149	0.0880048	3.04698	0.00231151	0.0363029
Rnft1	269.043	0.267816	0.07154	3.74358	0.000181414	0.00497068
Ppp1r18	288.787	0.26762	0.0683569	3.91505	9.04e-05	0.00282836
Gpr179	187.824	0.267155	0.0895188	2.98434	0.0028419	0.0424921
Ms4a6d	22.788	0.266492	0.0851376	3.13014	0.00174724	0.0295173
Ifit3	267.144	0.266252	0.0905504	2.94037	0.00327822	0.04737
Dock7	1148.88	0.266172	0.0608736	4.37254	1.23e-05	0.000508525
Skap2	631.122	0.26606	0.0646379	4.11617	3.85e-05	0.00139577
Fxyd5	196.254	0.264513	0.083898	3.1528	0.00161715	0.0281058
St14	37.3565	0.263543	0.0902803	2.91916	0.00350971	0.0496043
Prrx2	24.765	0.26268	0.0808778	3.24786	0.00116275	0.0219304
St6galnac5	152.326	0.262352	0.082719	3.17161	0.00151598	0.0268457
Tgif2	138.807	0.261802	0.0871476	3.00413	0.00266346	0.0405209
Lrrc75a	199.763	0.261285	0.0775784	3.36801	0.000757122	0.0155975
Fam129b	1326.19	0.260973	0.0596675	4.37379	1.22e-05	0.000507655
Gbp2	167.776	0.260036	0.0885814	2.93556	0.0033295	0.0479182
Ppp1r1a	326.594	0.259635	0.0876863	2.96095	0.00306687	0.0451209
Slc44a3	22.0117	0.259094	0.0819411	3.16196	0.00156711	0.0275153
Mustn1	32.1707	0.258838	0.08193	3.15925	0.00158175	0.0276546
Stom	302.738	0.258402	0.0793859	3.255	0.00113391	0.0215338
Kcnn3	412.289	0.258128	0.0710454	3.63328	0.000279842	0.00708049
Atp13a5	382.101	0.257184	0.0744549	3.45423	0.000551873	0.0121736
Hmgn1	967.137	0.256455	0.0568678	4.50967	6.49e-06	0.00029882
Srl	190.944	0.256339	0.0808136	3.17198	0.00151405	0.0268403
Dusp27	11.5927	0.255459	0.0694609	3.67774	0.000235312	0.00616138
Klf6	716.98	0.25448	0.0640256	3.97466	7.05e-05	0.00230576
Zc3hav1	296.786	0.254207	0.067656	3.75735	0.000171722	0.00476839
Flna	2979.3	0.253757	0.0736692	3.44455	0.00057202	0.0124847
Amotl1	1930.6	0.253667	0.0596295	4.25405	2.1e-05	0.000821945
Pld2	917.471	0.25305	0.0489499	5.16957	2.35e-07	1.56e-05
Vsir	1045.06	0.252227	0.0539072	4.67891	2.88e-06	0.000144831
Tm4sf1	300.599	0.251722	0.079051	3.1843	0.00145104	0.0259866
Tmem198b	388.724	0.25079	0.0756247	3.31625	0.000912347	0.0182491
Hs3st3b1	155.478	0.250472	0.0781083	3.20672	0.00134257	0.024349
Cmtm6	879.205	0.250168	0.0592658	4.22112	2.43e-05	0.000925432
Nectin2	168.841	0.250086	0.0814308	3.07115	0.00213239	0.0342052
Pclaf	14.0742	0.249779	0.0731531	3.41447	0.00063907	0.0137126
Pros1	612.412	0.249639	0.0568453	4.39155	1.13e-05	0.000475561
Parp3	338.28	0.249578	0.0813543	3.06779	0.00215651	0.0344917
Slc1a3	3958.71	0.248825	0.0722672	3.44312	0.00057504	0.0125341
Tmem100	375.12	0.248787	0.0756647	3.28802	0.00100895	0.0196579
Adcy7	789.739	0.248372	0.0512306	4.84813	1.25e-06	6.86e-05
Ptbp1	844.885	0.248203	0.0630902	3.93409	8.35e-05	0.00263823
Pald1	611.421	0.247907	0.0666465	3.71973	0.000199434	0.00539289
Entpd2	429.386	0.24769	0.0821436	3.01533	0.00256701	0.0393434
Apoe	32922.9	0.247523	0.0478241	5.1757	2.27e-07	1.52e-05
Mafb	344.857	0.247412	0.0742531	3.33201	0.000862217	0.0175007
Atp7b	177.859	0.244774	0.0777546	3.14803	0.00164373	0.0282012
Prkcd	621.957	0.244501	0.0750731	3.25684	0.0011266	0.0214444
Ccnd2	742.117	0.244213	0.0760047	3.21313	0.00131297	0.0239496
Hspb6	297.966	0.243679	0.0809048	3.01192	0.00259604	0.0397146
Gabra4	398.337	0.243676	0.0662661	3.67724	0.000235776	0.00616374
Ptk2b	224.734	0.241903	0.0797075	3.03488	0.00240628	0.0374708
Alpk1	190.693	0.241563	0.0827065	2.92073	0.00349216	0.0494528
Klhdc8b	390.371	0.240568	0.0738805	3.25617	0.00112925	0.02147
Ccnb2	16.507	0.240172	0.079867	3.00715	0.00263707	0.0401935
Galnt4	223.956	0.239814	0.0732105	3.27567	0.00105411	0.0202513
Il6st	4049.86	0.239088	0.0546678	4.37347	1.22e-05	0.000507655
AI504432	432.407	0.238137	0.0771761	3.08564	0.00203116	0.0329978
Cd72	144.278	0.238131	0.0808823	2.94417	0.0032382	0.0469724
Mtmr11	443.19	0.237833	0.0678522	3.50516	0.000456335	0.0103994
Ntrk1	37.273	0.237693	0.0729815	3.2569	0.00112637	0.0214444
Sh2d4a	11.5157	0.237187	0.0699873	3.38901	0.000701463	0.0145964
Slc16a9	171.944	0.236862	0.0788893	3.00247	0.00267801	0.0407048
Knl1	12.7013	0.236799	0.074192	3.19171	0.00141434	0.0254273
Cacnb3	911.06	0.236553	0.0749638	3.15556	0.00160188	0.0279181
Syt1	5255.37	0.236046	0.0731542	3.22669	0.0012523	0.0231587
Irf5	305.449	0.235384	0.0682519	3.44875	0.000563198	0.0123411
Lcat	836.291	0.234836	0.0650228	3.6116	0.000304317	0.00761808
Flvcr1	564.313	0.233952	0.0567793	4.12038	3.78e-05	0.00137351
Rgs20	223.113	0.233932	0.0785668	2.97749	0.00290622	0.0432192
Ecm2	280.312	0.233831	0.0790364	2.95852	0.00309123	0.0454389
Tgfbr2	694.202	0.233197	0.0703993	3.31249	0.00092471	0.0184518
Bmp2k	934.149	0.232914	0.0499812	4.66002	3.16e-06	0.000157343
Ngfr	156.349	0.232841	0.0773652	3.00963	0.00261565	0.0399038
Serpinf2	8.3612	0.231605	0.0551963	4.19602	2.72e-05	0.00102235
Sik1	315.368	0.231518	0.0709281	3.26412	0.00109804	0.0209976
Siglech	283.505	0.230874	0.0743624	3.10471	0.00190465	0.0315316
Kctd12	1473.92	0.227928	0.0556861	4.09308	4.26e-05	0.00152233
Gpam	3281.29	0.227653	0.0419631	5.42507	5.79e-08	4.33e-06
Xirp1	10.0372	0.227003	0.0628993	3.609	0.000307382	0.00767154
Siglec1	26.5163	0.226324	0.0749459	3.01984	0.00252911	0.0389432
Ptpn7	7.69956	0.225822	0.0638108	3.53893	0.000401746	0.0094151
Naglu	268.07	0.225797	0.072681	3.10669	0.00189198	0.0313734
Msn	2645.82	0.225318	0.0715883	3.14742	0.0016472	0.0282314
Plat	1161.3	0.224768	0.0762178	2.94903	0.00318777	0.046363
Mob1a	334.931	0.224105	0.0623645	3.59347	0.000326304	0.00798695
Zc3h12c	460.531	0.22371	0.0612571	3.652	0.000260211	0.00667578
Chdh	335.958	0.22371	0.0718519	3.11349	0.00184887	0.0308244
Dock6	714.087	0.223151	0.0763839	2.92144	0.00348414	0.0494528
Herc6	195.057	0.22258	0.0759361	2.93114	0.00337719	0.0484357
Odc1	2348.38	0.222026	0.0495053	4.4849	7.29e-06	0.000328406
9930111J21Rik1	13.4705	0.221183	0.0757243	2.92089	0.00349028	0.0494528
1700017B05Rik	330.889	0.221022	0.0718237	3.07729	0.00208895	0.03387
Prss30	15.8978	0.220155	0.0682466	3.22587	0.00125591	0.0231587
Afap1l2	316.453	0.219444	0.0750318	2.92467	0.00344818	0.0490705
Lonrf3	600.949	0.219019	0.0605618	3.61646	0.000298656	0.00749907
Iqgap1	854.086	0.216091	0.05664	3.81516	0.000136094	0.00393101
Stat3	2436.12	0.215374	0.0440011	4.89474	9.84e-07	5.53e-05
Pbk	12.8561	0.215045	0.0696259	3.08857	0.0020112	0.0327702
Parvb	751.431	0.214845	0.0609191	3.52673	0.000420725	0.00979608
Erlin1	330.984	0.214528	0.0678154	3.16341	0.00155933	0.0274731
Tpm4	1015.41	0.213324	0.0704522	3.02792	0.00246244	0.0382013
Als2cl	1188.64	0.213064	0.0690061	3.08761	0.00201774	0.0328445
Chl1	2692.2	0.212934	0.0533515	3.99115	6.58e-05	0.00218585
Tspan4	387.253	0.212856	0.0624805	3.40675	0.000657408	0.0139611
Ccl12	10.7839	0.212376	0.068433	3.10341	0.00191305	0.0316074
Mmgt2	348.817	0.21193	0.0601807	3.52157	0.000429005	0.00991331
Arsb	2184.32	0.211782	0.0453513	4.66981	3.01e-06	0.00015094
Fnip2	475.346	0.211598	0.0557027	3.7987	0.000145455	0.00414346
Pcdhgc3	1356.46	0.210665	0.0454013	4.64008	3.48e-06	0.00017075
Idh2	710.678	0.21063	0.0575131	3.6623	0.000249961	0.006463
Fzd1	519.314	0.210506	0.0671192	3.1363	0.00171097	0.029053
Tjp1	3496.58	0.210308	0.0392442	5.35895	8.37e-08	6.15e-06
Fkbp9	1013.21	0.210297	0.0593447	3.54365	0.000394625	0.00928774
Pbxip1	2994.38	0.209597	0.0401965	5.21431	1.85e-07	1.27e-05
Ampd3	1043.47	0.20932	0.0425638	4.9178	8.75e-07	4.99e-05
Rasa4	317.767	0.20904	0.0703996	2.96933	0.00298448	0.0441447
Gpr65	11.7236	0.208633	0.0706361	2.95364	0.00314051	0.0459181
Arl4a	395.469	0.203915	0.0674958	3.02115	0.00251816	0.0388107
Ddit3	459.698	0.20223	0.0608147	3.32534	0.000883099	0.0177934
Pan3	651.034	0.201856	0.0543641	3.71305	0.000204777	0.00551931
Cav2	821.937	0.201213	0.0656697	3.06401	0.00218391	0.0347616
Zfp281	837.17	0.199157	0.0548022	3.6341	0.000278957	0.00706891
Tab2	1688.9	0.198981	0.0395518	5.03091	4.88e-07	2.99e-05
Ndst1	3379.19	0.198059	0.0392733	5.0431	4.58e-07	2.83e-05
Cttnbp2nl	1132.9	0.197148	0.055956	3.52328	0.000426249	0.00987101
Lmo2	378.914	0.197074	0.0663505	2.97019	0.00297618	0.0440613
Zfp90	380.743	0.19668	0.0628913	3.12731	0.00176417	0.0297424
Galnt6	1592.53	0.196227	0.0546603	3.58993	0.000330761	0.00804835
Tspan6	407.285	0.194887	0.0624328	3.12155	0.00179901	0.0302374
Inppl1	1169.23	0.194663	0.052484	3.709	0.000208081	0.00556843
Luzp2	2800.73	0.194456	0.0493281	3.9421	8.08e-05	0.00257628
Necap2	966.872	0.194372	0.0522011	3.72351	0.000196471	0.00533898
Slc12a4	846.644	0.193864	0.0568492	3.41014	0.000649287	0.0138598
Hvcn1	411.381	0.193607	0.0622792	3.10869	0.00187916	0.0312035
Nfe2l2	781.604	0.193561	0.0606384	3.19206	0.00141264	0.0254245
Agtrap	540.822	0.193511	0.0544003	3.55716	0.000374889	0.00888655
Srgap1	1142.11	0.1933	0.0464028	4.1657	3.1e-05	0.00115061
Syngr2	476.955	0.192508	0.0617655	3.11675	0.00182855	0.0305783
Sgcg	13.3739	0.192205	0.0645071	2.9796	0.00288624	0.0430383
Suclg2	631.146	0.191954	0.0489003	3.92542	8.66e-05	0.00272464
Tmsb4x	9630.74	0.189977	0.060294	3.15085	0.00162797	0.0281058
Hmgn2	1016.83	0.188929	0.0567454	3.32941	0.000870298	0.017643
D2hgdh	291.239	0.188419	0.0645899	2.91716	0.00353239	0.0498396
Cotl1	1676.71	0.187195	0.039821	4.70092	2.59e-06	0.000133306
Clk1	2077.54	0.187093	0.06086	3.07415	0.00211105	0.0339608
Elmsan1	714.495	0.186952	0.0519765	3.59687	0.000322074	0.0079186
Lgi4	1693.06	0.186534	0.0528115	3.53208	0.000412309	0.00963531
Cd300lb	8.17103	0.185831	0.0552299	3.36469	0.000766304	0.015767
0610030E20Rik	592.179	0.185726	0.0578034	3.21306	0.0013133	0.0239496
Mef2c	519.015	0.184687	0.0595915	3.09923	0.00194028	0.0319295
Slc44a2	1426.86	0.184178	0.0411111	4.48001	7.46e-06	0.000334319
Rgma	1537.08	0.183964	0.0478815	3.84206	0.000122005	0.00359957
Peg10	1952.85	0.183652	0.0607865	3.02126	0.00251727	0.0388107
Shisa5	897.5	0.182256	0.0523353	3.48246	0.000496825	0.0111681
Slc22a4	724.672	0.18205	0.0476279	3.82234	0.000132193	0.00383849
Morc3	635.961	0.179851	0.0506408	3.5515	0.000383041	0.00904086
Tmed3	627.319	0.179813	0.0551317	3.26151	0.0011082	0.0211672
Septin11	1017.29	0.179604	0.0479737	3.74379	0.000181262	0.00497068
Gls	4554.53	0.179463	0.0588521	3.04939	0.00229306	0.0360818
Arhgef26	1244.48	0.179458	0.0550473	3.26007	0.00111386	0.0212508
Cd151	1041.67	0.178899	0.0536261	3.33604	0.000849817	0.0172915
Ifnar2	418.718	0.177868	0.0595168	2.98854	0.00280316	0.0421034
Tcn2	746.935	0.17776	0.0548571	3.24042	0.00119355	0.0223054
Pabpc1	2527.21	0.176333	0.0406873	4.33386	1.47e-05	0.000599208
Chst11	1172.37	0.176296	0.0435145	4.05144	5.09e-05	0.00177543
Itprid2	2495.99	0.176036	0.0484362	3.6344	0.000278634	0.00706891
Naga	614.82	0.175482	0.0564888	3.1065	0.00189319	0.0313734
Rgs10	693.498	0.173992	0.055261	3.14855	0.00164084	0.0281982
Sirpa	4280.53	0.173983	0.0404484	4.30136	1.7e-05	0.000679081
Tle3	1094.48	0.173435	0.057128	3.0359	0.00239821	0.0373805
Pkd2	1158.53	0.171159	0.0546024	3.13464	0.00172064	0.0291873
Gja1	7423.55	0.170759	0.0485338	3.51836	0.000434221	0.0100067
Rap1b	1003.83	0.168646	0.0531248	3.17453	0.00150079	0.0266624
Mcl1	1838.7	0.168377	0.0487229	3.45581	0.000548641	0.0121347
Wsb1	2688.31	0.167403	0.0515791	3.24556	0.0011722	0.0220582
Lix1l	667.497	0.167118	0.0547908	3.05011	0.00228756	0.0360296
Stk40	967.455	0.165126	0.0490011	3.36984	0.000752111	0.015533
Rapgef3	1749.64	0.165029	0.0560185	2.94598	0.00321938	0.0467404
Edem1	740.542	0.164597	0.0510393	3.22491	0.00126012	0.0232103
Ak4	678.367	0.164504	0.0554636	2.96599	0.00301713	0.0445081
Rnf111	778.476	0.164295	0.0526377	3.12124	0.00180092	0.0302386
Rps6ka3	977.156	0.164139	0.050526	3.2486	0.00115975	0.0218988
Ano6	960.704	0.164136	0.0465475	3.52621	0.00042156	0.00979608
Wasf2	857.153	0.162808	0.0436232	3.73214	0.000189863	0.00517644
Rb1	988.315	0.162385	0.0494409	3.28443	0.00102189	0.0197701
Vcl	1502.57	0.161303	0.043726	3.68895	0.00022518	0.00592425
Scn4a	6.46947	0.160423	0.0520415	3.08261	0.00205197	0.0333031
Celf1	2026.09	0.159816	0.0480381	3.32686	0.000878312	0.0177619
Sft2d2	1079.23	0.158856	0.0481034	3.30239	0.000958642	0.0188556
Lats2	955.575	0.158111	0.0472388	3.34705	0.000816764	0.0167219
Tulp3	715.654	0.156091	0.0504856	3.09179	0.00198953	0.0325134
Ccl2	5.8712	0.15574	0.0496256	3.1383	0.00169929	0.0288845
Sun2	2410.4	0.155074	0.0396866	3.90746	9.33e-05	0.00289667
Tmem47	3422.13	0.154562	0.0343317	4.50203	6.73e-06	0.000307136
Sike1	545.054	0.154495	0.0525904	2.9377	0.00330656	0.047646
Atp1b3	3990.4	0.154427	0.0514662	3.00055	0.00269496	0.0408872
Laptm4a	5030.38	0.153616	0.0410589	3.74136	0.000183025	0.00500653
Scg3	7050.89	0.153265	0.0425436	3.60253	0.000315136	0.00778277
Eef1a1	33640.8	0.152858	0.0382202	3.99941	6.35e-05	0.0021238
Asah1	1496.87	0.151596	0.0398059	3.80838	0.000139878	0.00401228
Pag1	1016.23	0.151514	0.0496713	3.05034	0.00228582	0.0360296
Mlc1	5326.51	0.15114	0.0444405	3.40095	0.000671511	0.0142058
Trpv1	14.8992	0.149644	0.0471087	3.17656	0.00149031	0.0265047
Sec61a1	1341.11	0.147159	0.0413597	3.55804	0.000373633	0.00886949
Samd8	1493.01	0.146968	0.0431742	3.40406	0.000663914	0.0140631
Klhl24	1403.63	0.146553	0.0393783	3.72168	0.000197905	0.00536911
Lasp1	2137.72	0.146449	0.0420612	3.48182	0.000498021	0.0111756
Plpp3	3807.37	0.144739	0.0437648	3.30721	0.000942317	0.018646
Cpne1	1034.53	0.143353	0.045796	3.13025	0.0017466	0.0295173
Slf2	1268.39	0.143255	0.0414797	3.45363	0.000553095	0.0121843
Ctsa	3484.76	0.143138	0.0343622	4.16555	3.11e-05	0.00115061
Erlin2	1478.37	0.142808	0.0480123	2.97441	0.00293557	0.0435773
Frmd4a	1638.03	0.142303	0.0414886	3.42993	0.000603732	0.0130904
Igf2r	1334.22	0.142203	0.0434574	3.27223	0.00106703	0.0204756
Gns	2869.19	0.132933	0.0293344	4.53163	5.85e-06	0.000274725
Rnf38	1136.29	0.132771	0.045007	2.95002	0.00317753	0.0462547
Ccdc50	1506.78	0.132492	0.0421779	3.14128	0.00168211	0.028681
Add3	3319	0.129616	0.0286288	4.52747	5.97e-06	0.000278609
Hipk1	3049.71	0.125962	0.0376922	3.34185	0.000832227	0.0169964
Rps8	3940.19	0.124667	0.0352771	3.53393	0.000409424	0.00958145
Mindy2	2031.16	0.123936	0.0365833	3.38778	0.000704615	0.0146252
Cdk19	1899.14	0.12104	0.0377129	3.20951	0.0013296	0.0241934
Cst3	16707.6	0.118756	0.0358698	3.31076	0.000930441	0.0184991
Rps4x	4220.88	0.11561	0.0395836	2.92065	0.003493	0.0494528
Slc25a23	5212.19	0.103169	0.0317331	3.25116	0.00114935	0.0217771
Oat	2273.02	0.101946	0.034773	2.93177	0.00337034	0.0484356
Wdr1	3556.02	0.0834177	0.0272278	3.0637	0.00218617	0.0347641
Nedd4	12633	0.0801562	0.0261379	3.06667	0.00216461	0.0345877

## Sheet: Down_degs
Chodl	483.172	-1.27548	0.0841214	-15.1623	6.28e-52	1.73e-48
Mmp9	270.23	-0.741697	0.0800869	-9.26116	2.02e-20	7.42e-18
Kcnj14	486.893	-0.64979	0.0869556	-7.47267	7.86e-14	1.63e-11
A230070E04Rik	13275.5	-0.598977	0.0581454	-10.3014	6.95e-25	3.19e-22
Nefh	24729.6	-0.582775	0.0668177	-8.72187	2.74e-18	9.04e-16
Slc10a4	479.569	-0.567703	0.0838585	-6.76978	1.29e-11	2.1e-09
Vipr2	127.659	-0.541534	0.09199	-5.88688	3.94e-09	3.8e-07
Rspo2	179.149	-0.520729	0.0882253	-5.90227	3.59e-09	3.53e-07
Nefm	43689	-0.518644	0.0660714	-7.84975	4.17e-15	1.01e-12
Grin3b	260.858	-0.515788	0.0832358	-6.19671	5.77e-10	6.76e-08
Nefl	47471.9	-0.497544	0.05662	-8.78742	1.53e-18	5.16e-16
Slc18a3	1169.78	-0.487295	0.0759145	-6.41899	1.37e-10	1.83e-08
Pdgfd	666.541	-0.471472	0.0687165	-6.86112	6.83e-12	1.19e-09
Kirrel2	114.666	-0.467047	0.0918478	-5.08501	3.68e-07	2.33e-05
Slco4a1	191.987	-0.437966	0.0845726	-5.17859	2.24e-07	1.52e-05
Fxyd7	1021.23	-0.4357	0.060339	-7.22086	5.17e-13	1.02e-10
Tesc	427.611	-0.432802	0.0729924	-5.9294	3.04e-09	3.04e-07
Aqp6	69.434	-0.425959	0.0921795	-4.62097	3.82e-06	0.000184521
Mnx1	37.3289	-0.424382	0.0903515	-4.69701	2.64e-06	0.000135003
Susd2	1902.72	-0.423458	0.0534659	-7.92014	2.37e-15	6.02e-13
Dffa	2456.28	-0.421397	0.0618017	-6.81853	9.2e-12	1.58e-09
Itih3	3957.39	-0.410738	0.07112	-5.77528	7.68e-09	6.97e-07
Lhx4	67.815	-0.407595	0.0911363	-4.47237	7.74e-06	0.00034357
Tacr1	443.794	-0.396999	0.0594158	-6.68171	2.36e-11	3.75e-09
Npb	59.9155	-0.391996	0.0922456	-4.24949	2.14e-05	0.000834914
Mest	605.594	-0.388977	0.0551015	-7.05929	1.67e-12	3.07e-10
Uts2b	71.7595	-0.38689	0.0919868	-4.20593	2.6e-05	0.000983025
Mrvi1	248.585	-0.383754	0.0863767	-4.44279	8.88e-06	0.000389966
Kcng4	2836.37	-0.380579	0.0754708	-5.04273	4.59e-07	2.83e-05
Tpd52l1	376.229	-0.37965	0.0676665	-5.6106	2.02e-08	1.62e-06
Calcb	147.787	-0.375654	0.0920411	-4.08137	4.48e-05	0.00159074
Glyat	51.9472	-0.374746	0.0922926	-4.06041	4.9e-05	0.00171839
Sh3bgr	520.762	-0.368343	0.0771803	-4.7725	1.82e-06	9.57e-05
Polr3g	254.14	-0.365006	0.0791532	-4.61138	4e-06	0.000191559
Ankrd35	918.66	-0.363842	0.055335	-6.57525	4.86e-11	7.1e-09
Lgr6	167.267	-0.355964	0.0841194	-4.23165	2.32e-05	0.00088722
Palm3	251.267	-0.3557	0.0822345	-4.32544	1.52e-05	0.000616455
Pcyt1b	2377	-0.347557	0.0434324	-8.00224	1.22e-15	3.2e-13
Chat	735.256	-0.346096	0.0846256	-4.08973	4.32e-05	0.00154116
Plxdc1	658.035	-0.345081	0.0560108	-6.16097	7.23e-10	8.24e-08
Lrrc49	3036.42	-0.341598	0.0493027	-6.92858	4.25e-12	7.55e-10
Arl16	653.544	-0.339585	0.0603866	-5.62352	1.87e-08	1.55e-06
Layn	177.601	-0.338443	0.087486	-3.86854	0.00010949	0.00330828
Vwa7	717.09	-0.336461	0.0634775	-5.30048	1.15e-07	8.33e-06
Prph	1423.93	-0.335149	0.0919337	-3.64555	0.000266819	0.00681357
Grid2ip	412.32	-0.335119	0.067465	-4.9673	6.79e-07	3.98e-05
Vdr	115.652	-0.331435	0.0910027	-3.64204	0.00027049	0.00688604
Arhgap36	850.083	-0.330459	0.0799789	-4.13182	3.6e-05	0.00131476
Nphs1	27.2208	-0.328027	0.0841943	-3.89607	9.78e-05	0.00300802
Kcns3	552.2	-0.326005	0.0552505	-5.9005	3.62e-09	3.54e-07
H2bc6	148.108	-0.324053	0.0909419	-3.5633	0.000366221	0.00873118
Syndig1l	439.673	-0.323696	0.0642742	-5.03617	4.75e-07	2.92e-05
Stk32a	813.708	-0.32299	0.0849224	-3.80336	0.000142748	0.00407336
Cdh6	794.197	-0.321349	0.0653896	-4.91438	8.91e-07	5.04e-05
Pkd2l1	447.239	-0.320404	0.0891022	-3.59592	0.000323248	0.00793567
Eml1	4420.13	-0.320052	0.0630338	-5.07747	3.82e-07	2.4e-05
Ism1	78.6554	-0.319767	0.0914358	-3.49718	0.000470208	0.0106568
Hebp2	432.321	-0.317394	0.067626	-4.69337	2.69e-06	0.0001362
Trim17	181.608	-0.317346	0.0818783	-3.87582	0.000106266	0.00322151
1700040D17Rik	367.552	-0.31733	0.0682967	-4.64634	3.38e-06	0.000166752
Tmem63c	1301.49	-0.317288	0.0476635	-6.65685	2.8e-11	4.36e-09
Prss12	262.128	-0.314679	0.0739569	-4.2549	2.09e-05	0.000820788
Lingo4	936.46	-0.311664	0.073807	-4.22269	2.41e-05	0.000921126
Dhcr24	5438.77	-0.309101	0.043807	-7.05599	1.71e-12	3.11e-10
1110008P14Rik	1326.75	-0.308539	0.0526258	-5.86289	4.55e-09	4.27e-07
Gstm7	1260.02	-0.305647	0.0537374	-5.68778	1.29e-08	1.11e-06
Chrm2	619.108	-0.305136	0.0700491	-4.35603	1.32e-05	0.000547056
Itpr3	583.068	-0.303138	0.0790704	-3.83377	0.000126193	0.00369021
Fgf1	7506.7	-0.302996	0.0667561	-4.53885	5.66e-06	0.000266237
Nrg1	1167.82	-0.302676	0.0541876	-5.5857	2.33e-08	1.85e-06
Kcnk9	4237.41	-0.298808	0.0600166	-4.97875	6.4e-07	3.8e-05
Hoxd8	885.839	-0.298763	0.0865786	-3.45077	0.000558988	0.0122785
Cfap99	77.4457	-0.298215	0.0905424	-3.29365	0.000988972	0.0193142
Mmp15	1481.32	-0.296083	0.0579264	-5.11137	3.2e-07	2.07e-05
Gm16596	800.627	-0.295741	0.0684189	-4.3225	1.54e-05	0.000623201
A730020M07Rik	93.394	-0.295169	0.0919838	-3.20892	0.00133232	0.0242163
Rab3b	636.471	-0.293346	0.0566569	-5.17759	2.25e-07	1.52e-05
Nkx2-9	147.355	-0.291374	0.0916349	-3.17973	0.00147412	0.0262451
Lhx3	50.5749	-0.29085	0.092329	-3.15014	0.0016319	0.0281249
Atp1a1	10632.8	-0.289675	0.054218	-5.34278	9.15e-08	6.69e-06
Etnppl	1112.73	-0.28663	0.0906944	-3.1604	0.00157554	0.0276156
Patj	2288.09	-0.285151	0.0465121	-6.13067	8.75e-10	9.77e-08
Ifitm10	1105.74	-0.284795	0.0551534	-5.1637	2.42e-07	1.6e-05
Vsx2	171.96	-0.284497	0.0816809	-3.48303	0.000495778	0.0111597
Tmprss5	720.669	-0.284235	0.0808638	-3.51498	0.000439779	0.0101057
Ccdc85c	2335.72	-0.282938	0.0437971	-6.46021	1.05e-10	1.44e-08
Gna14	150.945	-0.282794	0.092053	-3.07208	0.00212572	0.0341313
Galnt9	1520.59	-0.281323	0.0522384	-5.38538	7.23e-08	5.33e-06
A2ml1	113.674	-0.28116	0.0860581	-3.26709	0.00108659	0.0208267
Ccdc92	4056.09	-0.281122	0.0388733	-7.23176	4.77e-13	9.49e-11
Lsm11	1354.06	-0.280725	0.0463315	-6.05906	1.37e-09	1.48e-07
Hsd11b1	629.057	-0.279228	0.0819386	-3.40777	0.000654966	0.0139271
Slc35d3	236.378	-0.279022	0.0765902	-3.64305	0.000269423	0.00686946
Fam135b	558.48	-0.278249	0.0812845	-3.42314	0.000619013	0.0133691
Rimkla	2792.31	-0.278216	0.0495059	-5.61985	1.91e-08	1.56e-06
Clvs1	1761.55	-0.277351	0.0508211	-5.45741	4.83e-08	3.68e-06
Robo4	281.829	-0.273591	0.0691793	-3.95481	7.66e-05	0.00245731
Hhipl1	269.292	-0.272347	0.0697987	-3.9019	9.54e-05	0.00295296
Mccc1os	111.46	-0.270776	0.0880481	-3.07532	0.00210279	0.0339459
Trhr	286.896	-0.270421	0.0850009	-3.18138	0.00146574	0.026124
H1f2	301.264	-0.270104	0.0770983	-3.50337	0.000459416	0.0104552
Impdh1	1347.42	-0.265529	0.0462863	-5.73667	9.66e-09	8.58e-07
Hr	1635.64	-0.265266	0.069186	-3.8341	0.000126025	0.00369021
Tfrc	3397.69	-0.265201	0.0673973	-3.9349	8.32e-05	0.00263443
Calb2	3719.7	-0.26467	0.0666361	-3.97186	7.13e-05	0.00231934
Cdh22	1077.59	-0.262941	0.05963	-4.40954	1.04e-05	0.000444545
Smco3	289.708	-0.262152	0.0765157	-3.42612	0.000612272	0.0132426
Ppp1r1b	1224.52	-0.261115	0.0600857	-4.3457	1.39e-05	0.000572013
Aox4	33.2878	-0.258857	0.0841827	-3.07494	0.00210546	0.0339459
Pacsin3	1184.18	-0.258005	0.0557342	-4.62921	3.67e-06	0.000177847
Olfr287	337.382	-0.257281	0.0733832	-3.50599	0.000454918	0.0103814
Kcnc3	17027.2	-0.256857	0.0579953	-4.42893	9.47e-06	0.000410675
Cpne6	1942.1	-0.256738	0.0522085	-4.91755	8.76e-07	4.99e-05
Rcor2	189.065	-0.256446	0.0769305	-3.33347	0.000857687	0.0174301
Acly	11839.9	-0.255031	0.053212	-4.79274	1.65e-06	8.77e-05
P2rx5	386.963	-0.254667	0.0625986	-4.06825	4.74e-05	0.00166867
Lcp1	1035.53	-0.254001	0.0661808	-3.83798	0.000124052	0.00364047
Caln1	1520.2	-0.252931	0.0784865	-3.22261	0.0012703	0.0233198
Acy3	227.367	-0.252862	0.0826306	-3.06015	0.00221224	0.0350775
Kcnab1	3360.74	-0.251846	0.0494064	-5.09743	3.44e-07	2.2e-05
Anxa6	4682.22	-0.251745	0.047525	-5.29711	1.18e-07	8.45e-06
Flrt2	585.149	-0.251416	0.059259	-4.24266	2.21e-05	0.000856688
P2rx6	460.206	-0.251163	0.0664417	-3.78021	0.000156698	0.00441312
Kcnk3	883.322	-0.251092	0.0520983	-4.81959	1.44e-06	7.77e-05
Htr7	599.226	-0.250397	0.05834	-4.29204	1.77e-05	0.000706542
Car7	295.663	-0.250385	0.0702002	-3.56673	0.000361465	0.00865526
Alox8	281.146	-0.250382	0.0794619	-3.15097	0.00162731	0.0281058
Adra1a	301.45	-0.249728	0.0754446	-3.31008	0.000932701	0.0185217
Slc35f3	787.959	-0.248605	0.0659287	-3.77082	0.00016271	0.00456416
Btbd17	478.571	-0.248501	0.0794411	-3.12811	0.00175935	0.0296914
Asb16	319.011	-0.247459	0.0761033	-3.25162	0.00114749	0.0217668
Fndc4	2716.85	-0.246893	0.0423145	-5.83471	5.39e-09	5.01e-07
Kif5b	13981.9	-0.246364	0.0482604	-5.1049	3.31e-07	2.14e-05
Mchr1	192.627	-0.245737	0.0760544	-3.23107	0.00123329	0.0228691
Necab3	1188.15	-0.245612	0.0549058	-4.47334	7.7e-06	0.000342939
Vit	213.315	-0.245495	0.0787163	-3.11873	0.00181631	0.0304661
Lrsam1	1759.11	-0.24493	0.0493102	-4.96713	6.8e-07	3.98e-05
Fbxo2	3066.88	-0.244861	0.0497578	-4.92107	8.61e-07	4.94e-05
Hddc2	261.263	-0.2444	0.0708308	-3.45048	0.0005596	0.0122785
Plekhd1	852.729	-0.243186	0.0546778	-4.44762	8.68e-06	0.000383564
Aldh1a7	22.4777	-0.243012	0.0786177	-3.09106	0.00199444	0.0325615
Ar	683.49	-0.242141	0.0597722	-4.05106	5.1e-05	0.00177543
Aard	223.511	-0.241817	0.0724536	-3.33755	0.000845218	0.0172404
1700003D09Rik	297.712	-0.241557	0.0766838	-3.15004	0.00163248	0.0281249
Pgr	509.31	-0.241279	0.0636648	-3.78983	0.000150747	0.00427212
Nphs1os	8.19826	-0.240195	0.0666359	-3.60459	0.000312651	0.00775619
Map1b	44100.2	-0.239269	0.0484706	-4.93638	7.96e-07	4.61e-05
Carmil2	1743.08	-0.239088	0.0515184	-4.64082	3.47e-06	0.00017064
Apln	1698.19	-0.238027	0.0698812	-3.40616	0.000658824	0.0139732
Dusp15	1664.83	-0.237447	0.058169	-4.08201	4.46e-05	0.00158979
Hcn2	8705.98	-0.237424	0.0594455	-3.99397	6.5e-05	0.00216434
Frmpd3	1622.61	-0.23654	0.0433665	-5.45444	4.91e-08	3.72e-06
Gjc2	1911.42	-0.235842	0.077626	-3.03818	0.00238015	0.037169
Adam19	1272.34	-0.235432	0.065071	-3.61809	0.000296789	0.00746355
Nell1	1040.24	-0.234978	0.0586609	-4.0057	6.18e-05	0.00208492
Dexi	1296.75	-0.234533	0.0540141	-4.34206	1.41e-05	0.000580129
Esyt1	2995.32	-0.234227	0.0421218	-5.56071	2.69e-08	2.11e-06
Cldn10	1135.25	-0.233348	0.0793252	-2.94166	0.00326453	0.0472299
Atp8a2	1615.91	-0.233038	0.0739207	-3.15255	0.00161854	0.0281058
Abhd17a	2094.22	-0.232892	0.0586221	-3.97276	7.1e-05	0.00231518
Fbxo31	3493.44	-0.232446	0.0441244	-5.26798	1.38e-07	9.7e-06
Ttc39a	391.503	-0.232153	0.0723058	-3.21071	0.00132408	0.0241195
Pigz	661.069	-0.232021	0.0512212	-4.52979	5.9e-06	0.000276351
Camk1d	4146.62	-0.232008	0.0471925	-4.9162	8.82e-07	5.01e-05
Phospho1	1374.02	-0.23177	0.0633121	-3.66075	0.000251477	0.00649203
Adam23	7607.71	-0.230757	0.0462275	-4.99177	5.98e-07	3.58e-05
Birc7	11.7343	-0.230613	0.07177	-3.21323	0.00131252	0.0239496
Prima1	413.862	-0.230243	0.0672031	-3.42608	0.000612354	0.0132426
Hapln2	3732.75	-0.229034	0.0493732	-4.63883	3.5e-06	0.000171272
Gmpr	1454.03	-0.228816	0.0607377	-3.76728	0.000165034	0.00461369
Cacng2	1567.64	-0.228454	0.0635636	-3.59411	0.000325505	0.00797923
Ankrd6	1157.83	-0.228311	0.0463	-4.93113	8.18e-07	4.72e-05
Atp10b	244.355	-0.228097	0.0769244	-2.96521	0.00302479	0.0445813
Ccdc88c	1145.52	-0.228012	0.045913	-4.96616	6.83e-07	3.99e-05
Slc29a4	1067.61	-0.227653	0.0505497	-4.50354	6.68e-06	0.00030586
Mgst3	1495.07	-0.227266	0.0570671	-3.98243	6.82e-05	0.00224956
Olig2	1277.59	-0.226915	0.0767414	-2.95689	0.00310764	0.0456395
Vamp1	32648	-0.226102	0.0585847	-3.85941	0.00011366	0.00340198
Them6	1645.74	-0.225446	0.0563335	-4.00199	6.28e-05	0.00210933
Slc25a29	307.954	-0.224557	0.0672932	-3.33699	0.000846908	0.0172535
Efna3	589.732	-0.224208	0.0526813	-4.25593	2.08e-05	0.000818942
Pcp4l1	6027.34	-0.224123	0.0364435	-6.14988	7.75e-10	8.72e-08
Tmem229b	2284.86	-0.223994	0.0559582	-4.00287	6.26e-05	0.00210574
Sppl2b	1305.41	-0.222414	0.069102	-3.21863	0.00128805	0.0236195
Mtap	743.661	-0.222398	0.063123	-3.52325	0.000426284	0.00987101
Ppp2r2b	2483.17	-0.222236	0.0457911	-4.85325	1.21e-06	6.73e-05
Rerg	463.447	-0.222036	0.0589568	-3.76608	0.000165829	0.0046281
Glra1	2804.41	-0.221183	0.0707487	-3.12632	0.00177008	0.0298117
Cgnl1	3411.15	-0.220883	0.0425866	-5.18668	2.14e-07	1.46e-05
Nexn	363.039	-0.220797	0.0684847	-3.22403	0.00126399	0.0232558
Epb41l3	15663.8	-0.220285	0.0415541	-5.30117	1.15e-07	8.33e-06
Ankrd55	580.097	-0.219782	0.0554297	-3.96505	7.34e-05	0.00237254
Rnasel	311.476	-0.21961	0.0730775	-3.00517	0.00265436	0.0404197
Cptp	853.272	-0.219222	0.0550539	-3.98196	6.83e-05	0.00224956
Entpd3	1302.66	-0.218536	0.0533385	-4.09715	4.18e-05	0.00149903
Lgr5	645.074	-0.217412	0.0682791	-3.18416	0.00145174	0.0259866
Pacrg	345.016	-0.216679	0.061951	-3.49759	0.000469475	0.0106548
Olig1	5696.53	-0.216605	0.0549582	-3.94127	8.11e-05	0.00258023
Ppip5k2	1821.46	-0.21592	0.0526385	-4.10195	4.1e-05	0.00147471
Cabp7	5817.03	-0.214587	0.0653234	-3.285	0.00101984	0.0197589
Vstm5	413.259	-0.214576	0.0615349	-3.48706	0.000488357	0.0110227
Tmem125	859.912	-0.214086	0.0596518	-3.58892	0.000332047	0.00806776
Stmn2	8896.97	-0.213706	0.048191	-4.43456	9.23e-06	0.000402203
Acan	916.021	-0.213681	0.0620228	-3.4452	0.000570628	0.0124708
Bcas1os2	1018.57	-0.213172	0.0725293	-2.93911	0.00329154	0.047496
Cacna2d3	2114.45	-0.213123	0.0577032	-3.69344	0.00022124	0.00583921
Slit2	1556.49	-0.212848	0.0502258	-4.23781	2.26e-05	0.000869587
Pygm	3807.08	-0.212562	0.064183	-3.31181	0.000926953	0.0184742
Asic1	2355.75	-0.211982	0.0409875	-5.17186	2.32e-07	1.55e-05
Slc7a10	3001.24	-0.211392	0.062231	-3.39689	0.000681575	0.014327
Zfyve28	1115.82	-0.210987	0.0601479	-3.50781	0.000451808	0.0103247
Fam43b	544.354	-0.209964	0.0685248	-3.06406	0.00218358	0.0347616
St3gal5	1693.64	-0.209819	0.0394531	-5.31819	1.05e-07	7.63e-06
Fam57b	2672.58	-0.20967	0.0497547	-4.21407	2.51e-05	0.0009526
Hspa12a	7430.66	-0.209452	0.0360479	-5.81039	6.23e-09	5.69e-07
Tubb4b	8657.74	-0.208741	0.0430383	-4.85013	1.23e-06	6.82e-05
Cdr2	1657.65	-0.206384	0.0470636	-4.38522	1.16e-05	0.000487123
Gpd1	4566.79	-0.206334	0.0635988	-3.24431	0.00117736	0.0220798
Sap30l	796.735	-0.206041	0.0670301	-3.07387	0.00211305	0.0339608
Mcf2	637.915	-0.205709	0.0693241	-2.96735	0.0030038	0.044351
Nat8l	22163.6	-0.205245	0.0496611	-4.13291	3.58e-05	0.00131225
Tns1	3999.38	-0.204696	0.0600472	-3.40892	0.000652202	0.0139041
Capn1	1213.19	-0.204155	0.0536425	-3.80584	0.000141322	0.00404667
Etv1	1419.72	-0.20402	0.0616992	-3.30669	0.000944041	0.018646
Tubb3	12706	-0.203932	0.0575964	-3.54072	0.000399044	0.00937839
Syndig1	1194.55	-0.202735	0.0538996	-3.76134	0.000169006	0.00470087
Acat2	962.039	-0.202704	0.0501547	-4.04158	5.31e-05	0.00182749
Kctd17	2674.25	-0.202415	0.046075	-4.39317	1.12e-05	0.000473254
Prune2	7080.89	-0.202344	0.0362871	-5.5762	2.46e-08	1.94e-06
Fgf9	852.075	-0.2005	0.0617908	-3.24481	0.00117528	0.0220798
Cmpk2	894.331	-0.200401	0.047819	-4.19082	2.78e-05	0.00104369
Hecw2	1191.68	-0.198861	0.0463505	-4.29039	1.78e-05	0.000710101
Mcam	2026.29	-0.198693	0.0559361	-3.55214	0.000382113	0.00903187
Tdrp	729.701	-0.198677	0.0656018	-3.02853	0.00245748	0.0381603
Scn4b	14182.1	-0.197473	0.0554837	-3.55912	0.000372103	0.00884588
BC034090	631.425	-0.197297	0.0530993	-3.71563	0.0002027	0.00547223
Paqr9	1772.57	-0.197117	0.0394047	-5.00239	5.66e-07	3.41e-05
Abi3	1347.05	-0.194816	0.0615825	-3.16349	0.0015589	0.0274731
Clstn2	1595.31	-0.194351	0.052535	-3.69947	0.000216052	0.00574816
Myh14	3712.91	-0.194162	0.0493028	-3.93816	8.21e-05	0.00260882
Peli3	1485.56	-0.194057	0.0509396	-3.80956	0.000139215	0.00400716
Nos1ap	1367.27	-0.193752	0.0588028	-3.29495	0.00098439	0.0192478
Kcnh1	746.341	-0.193425	0.0521695	-3.70762	0.000209216	0.00558428
Spire2	933.26	-0.19335	0.0499813	-3.86845	0.000109528	0.00330828
Chst12	604.214	-0.193136	0.0543372	-3.5544	0.000378844	0.00896742
Pgp	1831.89	-0.193091	0.05575	-3.46351	0.000533175	0.0118881
Kcnip1	1105.91	-0.192288	0.0582213	-3.30271	0.000957545	0.0188556
Plekhm2	4419.41	-0.191867	0.0445163	-4.31004	1.63e-05	0.000654551
Unc5b	3090.44	-0.19175	0.055448	-3.45818	0.00054383	0.0120705
Mcu	661.11	-0.191465	0.0560543	-3.41571	0.000636166	0.0137037
Prrt3	997.929	-0.191169	0.0582455	-3.28212	0.00103028	0.0198859
Cabp1	1844.72	-0.190929	0.0546729	-3.4922	0.000479056	0.0108424
Diras2	3431.63	-0.19091	0.0351988	-5.42376	5.84e-08	4.34e-06
Pdk3	680.696	-0.190773	0.0548276	-3.47951	0.000502323	0.0112306
Lypd6	429.816	-0.19045	0.0628258	-3.0314	0.00243422	0.0378346
Timm8b	1176.74	-0.190094	0.0490128	-3.87845	0.000105126	0.0031928
Slc32a1	4261.79	-0.189837	0.052623	-3.6075	0.000309161	0.00769393
Gabra5	1293.71	-0.189721	0.0459612	-4.12785	3.66e-05	0.00133259
Ppp4r1l-ps	487.691	-0.189706	0.0609549	-3.11224	0.00185675	0.0309247
Crtac1	2311.94	-0.189152	0.0460074	-4.11133	3.93e-05	0.00141913
Cend1	8598.86	-0.188545	0.0489361	-3.85288	0.000116737	0.00347519
Lnx1	767.553	-0.187814	0.0463646	-4.0508	5.1e-05	0.00177543
Dnajc15	608.87	-0.187354	0.0629762	-2.975	0.00292989	0.0435321
Kcnab2	13933.9	-0.186794	0.0461418	-4.04825	5.16e-05	0.00178452
Vegfa	2320.5	-0.186469	0.0567195	-3.28756	0.00101059	0.019663
Clmp	846.645	-0.186226	0.0630366	-2.95426	0.00313422	0.0458667
Trnp1	2434.51	-0.185716	0.0600028	-3.09513	0.00196726	0.0323414
B3galt5	5417.78	-0.185289	0.0559638	-3.31087	0.000930072	0.0184991
Cdk5r2	1888.25	-0.185211	0.0543452	-3.40805	0.000654289	0.0139271
Dync1i1	3803.94	-0.185032	0.0465582	-3.9742	7.06e-05	0.00230576
Rell2	4794.02	-0.184638	0.0463228	-3.98591	6.72e-05	0.00223019
Rgs7bp	3241.14	-0.184403	0.0537055	-3.43359	0.00059564	0.0129319
Gpc1	3002.37	-0.183767	0.04102	-4.47993	7.47e-06	0.000334319
Ccdc124	1212.48	-0.183763	0.0417577	-4.40069	1.08e-05	0.0004595
A830018L16Rik	867.49	-0.183626	0.0496944	-3.6951	0.000219803	0.00581984
Insig1	2895.81	-0.183136	0.0543368	-3.37039	0.000750617	0.0155215
Hsd17b11	1112.4	-0.182751	0.0595427	-3.06924	0.00214604	0.0343575
Arhgef4	8318.69	-0.182412	0.0324254	-5.62558	1.85e-08	1.53e-06
Sfrp1	734.806	-0.182358	0.0609669	-2.99111	0.00277969	0.0419417
Asah2	2194.28	-0.181444	0.0548937	-3.30536	0.000948531	0.0187012
Gria4	4720.19	-0.181238	0.0477187	-3.79805	0.000145836	0.00414717
Pcdh11x	455.529	-0.180817	0.059894	-3.01895	0.00253652	0.0389845
Syt3	2581.25	-0.180515	0.0473969	-3.80859	0.000139761	0.00401228
Jak1	5294.74	-0.18049	0.0384314	-4.69643	2.65e-06	0.000135003
Lrrc75b	1861.21	-0.179826	0.0470834	-3.8193	0.000133831	0.00387241
Mmp17	817.963	-0.179773	0.052624	-3.41618	0.000635063	0.0136978
Parm1	882.945	-0.179426	0.0599751	-2.99168	0.00277451	0.0419019
Ckb	41655.7	-0.178904	0.0311264	-5.74766	9.05e-09	8.12e-07
Zmat5	1412.58	-0.17886	0.0581684	-3.07487	0.00210595	0.0339459
Uqcr11	1429.11	-0.178422	0.0455803	-3.91446	9.06e-05	0.00282991
Syt2	20458.7	-0.17832	0.0487665	-3.65661	0.000255569	0.00657712
Ndufb7	1479.72	-0.178044	0.0494207	-3.60262	0.000315028	0.00778277
Arhgap24	583.846	-0.177798	0.0576105	-3.08621	0.00202722	0.0329663
Klc2	8844.1	-0.177611	0.0395006	-4.4964	6.91e-06	0.000312842
Ano4	1383.85	-0.176116	0.0444315	-3.96377	7.38e-05	0.00238074
Iscu	2034.81	-0.175973	0.0558883	-3.14865	0.00164026	0.0281982
Rasal2	1998.41	-0.175894	0.042765	-4.11303	3.9e-05	0.00141177
Lamp5	6013.08	-0.175815	0.05985	-2.93759	0.00330771	0.047646
Fam189b	1353.31	-0.175633	0.0528109	-3.3257	0.000881961	0.0177921
Plcb1	2457.49	-0.1754	0.0498708	-3.5171	0.000436294	0.0100396
Gpr137	2610.24	-0.175399	0.0385702	-4.54752	5.43e-06	0.000256243
Septin9	1231.09	-0.17536	0.0530255	-3.3071	0.000942687	0.018646
Stmn3	9496.57	-0.174825	0.0443263	-3.94405	8.01e-05	0.00256033
Cd7	6.53848	-0.174824	0.0597256	-2.92712	0.00342117	0.0488545
Lrrtm3	638.219	-0.174334	0.0579008	-3.0109	0.00260474	0.0397741
Metrn	2094.08	-0.173742	0.0540682	-3.21338	0.00131181	0.0239496
Dkk3	2973.47	-0.173738	0.052544	-3.30653	0.000944603	0.018646
Cox6a1	3712.31	-0.173522	0.0484579	-3.58088	0.000342441	0.00825959
Pou3f3	1315.93	-0.173082	0.0562746	-3.07567	0.00210033	0.0339459
Guk1	1542.78	-0.172336	0.0466322	-3.69565	0.000219327	0.00581658
P4htm	1628.84	-0.172093	0.0427154	-4.02882	5.61e-05	0.00190962
Laptm4b	3838.66	-0.171992	0.0413112	-4.16333	3.14e-05	0.00115926
Abcb9	1467.39	-0.171448	0.0545039	-3.14562	0.00165737	0.0283469
Mypop	1230.04	-0.171308	0.044516	-3.84823	0.000118975	0.00352202
Cntn4	919.313	-0.171266	0.0475827	-3.59934	0.000319024	0.00786703
Nxpe3	1461.47	-0.170703	0.0496514	-3.43803	0.00058596	0.0127385
Selenom	1865.36	-0.170526	0.0474624	-3.59287	0.000327051	0.00799341
Stard4	1252.57	-0.170103	0.0512031	-3.32212	0.000893373	0.0179736
Mpi	981.007	-0.169979	0.0449582	-3.78082	0.000156315	0.00441312
Klhl4	1113.64	-0.169813	0.0574384	-2.95644	0.00311217	0.0456438
Sigmar1	949.841	-0.169415	0.0510417	-3.31915	0.00090291	0.0181042
Tigar	1068.41	-0.169396	0.0573816	-2.9521	0.00315624	0.0459942
Chga	8709.11	-0.169333	0.0483917	-3.49921	0.000466637	0.0106049
Slc7a14	4557.24	-0.169085	0.0512594	-3.29861	0.000971636	0.019087
Brsk1	8400.84	-0.169066	0.0385273	-4.3882	1.14e-05	0.000481722
Tmem250-ps	2411.79	-0.168632	0.0450175	-3.74593	0.000179727	0.00494085
Sipa1l3	1896.97	-0.168484	0.0459648	-3.66551	0.000246849	0.00640257
Dpcd	1071.71	-0.168473	0.0556757	-3.02597	0.0024784	0.0384129
D430041D05Rik	2084.74	-0.167592	0.043413	-3.86041	0.000113197	0.00339426
Mapk8ip2	7831.62	-0.167141	0.0439433	-3.80355	0.000142639	0.00407336
Borcs5	614.051	-0.166792	0.0557695	-2.99075	0.00278295	0.0419524
Grid1	1196.48	-0.165661	0.0410063	-4.0399	5.35e-05	0.00183682
Hecw1	2228.67	-0.164949	0.045072	-3.65967	0.000252537	0.00650923
Eps8l3	1397.15	-0.164855	0.0510804	-3.22736	0.00124939	0.0231417
Lpcat4	1991.78	-0.164819	0.042676	-3.8621	0.000112416	0.00338312
Habp4	6199.3	-0.164558	0.0405637	-4.05677	4.98e-05	0.00174169
Sult4a1	10021.4	-0.164261	0.0420941	-3.90223	9.53e-05	0.00295296
Psmc5	5657.61	-0.164091	0.0529174	-3.10089	0.00192939	0.0317837
Phactr1	4333.66	-0.16381	0.0321768	-5.09093	3.56e-07	2.27e-05
Lrrc4b	3336.79	-0.163739	0.0518115	-3.16028	0.00157617	0.0276156
Slc45a4	2250.01	-0.163591	0.0423467	-3.86314	0.000111941	0.00337497
Kif5c	22025.4	-0.16334	0.0403469	-4.0484	5.16e-05	0.00178452
Nkiras1	3194.11	-0.162797	0.0485453	-3.3535	0.000797963	0.0163776
Herc3	3133.7	-0.161622	0.0416038	-3.8848	0.000102414	0.00313349
Calm3	28524	-0.161586	0.0413036	-3.91216	9.15e-05	0.00285017
Mdp1	801.948	-0.161559	0.0459831	-3.51344	0.000442349	0.0101507
Eme2	579.907	-0.160911	0.0505023	-3.18621	0.00144152	0.0258597
Ptch1	3268.51	-0.160844	0.0494914	-3.24993	0.00115433	0.0218213
Ncs1	9875.37	-0.160781	0.0386782	-4.15689	3.23e-05	0.0011871
Tomm40	1304.34	-0.160711	0.0409661	-3.92302	8.74e-05	0.00274674
Clec2l	1107.52	-0.160509	0.0522151	-3.074	0.00211209	0.0339608
Atl1	1869.22	-0.159999	0.0434442	-3.68286	0.00023063	0.0060515
Stx18	1402.91	-0.159602	0.0447604	-3.56568	0.000362909	0.00867071
Vxn	1310.08	-0.159533	0.0527843	-3.02235	0.00250817	0.0387652
Tmem150b	2696.25	-0.159472	0.0544192	-2.93043	0.00338489	0.048504
Sh3bp5l	1731.62	-0.15942	0.0436139	-3.65526	0.00025692	0.00660159
Kcnc4	1824.18	-0.158799	0.0403384	-3.93666	8.26e-05	0.00262016
Apbb1	8706.07	-0.158784	0.0360664	-4.40254	1.07e-05	0.000456774
Megf10	2015.96	-0.158565	0.0495734	-3.19858	0.00138105	0.0249646
Camkk1	3881.59	-0.158482	0.0427042	-3.71114	0.000206325	0.00554293
Slitrk1	1597.78	-0.158256	0.0378746	-4.17842	2.94e-05	0.00109972
Ap1b1	5974.17	-0.157693	0.0538503	-2.92837	0.00340747	0.0487418
Omg	3081.84	-0.156785	0.0406091	-3.86083	0.000113002	0.00339426
Nckipsd	2407.43	-0.156424	0.0461159	-3.39198	0.000693899	0.0145305
Cadm3	8459.92	-0.156047	0.0368277	-4.23721	2.26e-05	0.000869587
Stk39	2990.33	-0.155869	0.0458754	-3.39766	0.000679643	0.0143045
Uqcrq	1646.22	-0.155499	0.0507689	-3.06288	0.0021922	0.0348265
Parva	4175.1	-0.155176	0.0362918	-4.27578	1.9e-05	0.000751051
Spred2	1053.44	-0.155046	0.0491083	-3.15722	0.00159281	0.0277892
Mllt11	4386.09	-0.154158	0.0373133	-4.13145	3.6e-05	0.00131476
Arhgdig	957.024	-0.154002	0.0497971	-3.09259	0.00198416	0.0324604
Gne	1149.85	-0.153789	0.0488473	-3.14837	0.00164185	0.0281982
Ppa2	879.823	-0.153685	0.0493353	-3.11511	0.00183879	0.0307183
Gls2	1112.99	-0.153517	0.0494729	-3.10306	0.00191531	0.0316131
Pgs1	2162.52	-0.153362	0.0488326	-3.14057	0.00168618	0.0287184
Slc25a1	1712.65	-0.153238	0.0473936	-3.2333	0.00122371	0.0227425
Cplx1	28388.9	-0.152998	0.0507317	-3.01583	0.00256277	0.0393434
Thoc3	699.064	-0.152833	0.0480256	-3.18232	0.00146099	0.0260957
Ak1	2469.21	-0.152735	0.0449214	-3.40004	0.000673748	0.0142348
Dnaja4	1279.45	-0.152076	0.0519751	-2.92594	0.00343413	0.0489549
Mast1	4623.77	-0.151885	0.0421138	-3.60653	0.000310318	0.00770988
Slc9a1	1839.35	-0.151214	0.0412846	-3.66273	0.000249545	0.00646236
Cpt1a	1761.29	-0.151022	0.0474641	-3.18182	0.0014635	0.0261123
Ctnnbip1	1143.89	-0.150193	0.0476634	-3.15111	0.0016265	0.0281058
Dock9	7074.32	-0.150082	0.04634	-3.23871	0.00120073	0.0223658
Thsd7a	1797	-0.150075	0.0513232	-2.92413	0.00345425	0.0491146
Ndufb8	3958.52	-0.150051	0.0446889	-3.35768	0.000786009	0.0161523
5730409E04Rik	2837.92	-0.149939	0.0385407	-3.8904	0.000100079	0.00306774
Nacad	2980.93	-0.149446	0.0475898	-3.14029	0.00168779	0.0287184
Tvp23a	1325.55	-0.149208	0.0494168	-3.01937	0.00253301	0.0389669
Bcan	9965.53	-0.148293	0.0370032	-4.00756	6.13e-05	0.00207779
Rbfox3	3498.38	-0.148242	0.0437419	-3.38903	0.000701414	0.0145964
Bnip3	2482.6	-0.148104	0.0478904	-3.09257	0.00198432	0.0324604
Gas6	4315.56	-0.148062	0.0450928	-3.28349	0.00102529	0.0198126
Kcna1	15708.6	-0.146499	0.0474237	-3.08915	0.0020073	0.0327389
Trpm2	2118.16	-0.146384	0.0402681	-3.63523	0.000277737	0.00705964
Ptpn5	2956.29	-0.146381	0.040894	-3.57952	0.00034423	0.00829063
Rtn2	2108.57	-0.146349	0.0424563	-3.44704	0.000566755	0.0124026
Nacc2	13017.3	-0.146331	0.0369049	-3.96509	7.34e-05	0.00237254
Tomm7	901.275	-0.146055	0.0476997	-3.06197	0.00219886	0.0348987
Ywhag	32774.5	-0.146019	0.0350201	-4.16958	3.05e-05	0.00113952
Magi3	1585.49	-0.144622	0.0491555	-2.94214	0.00325956	0.0471994
Maneal	1392.83	-0.144469	0.0411746	-3.5087	0.00045031	0.0103047
Tmem132b	1663.41	-0.14435	0.0492982	-2.92811	0.00341033	0.0487418
Pde8b	1101.19	-0.144349	0.0466663	-3.09322	0.00197996	0.0324533
4933431E20Rik	3822.6	-0.144154	0.0445648	-3.23471	0.00121767	0.0226558
Limk1	6238.29	-0.144118	0.048196	-2.99024	0.00278754	0.0419758
Nfic	6826.56	-0.14407	0.0374419	-3.84784	0.000119163	0.00352202
Klc1	15499.7	-0.143605	0.0317592	-4.52169	6.13e-06	0.000285524
Akap6	6703.41	-0.143589	0.0379859	-3.78006	0.000156791	0.00441312
Slc25a27	1924.71	-0.143513	0.0467361	-3.0707	0.00213557	0.0342229
Dok7	904.729	-0.142794	0.0472269	-3.02358	0.00249803	0.0386808
Rph3a	22025.7	-0.142435	0.0451938	-3.15165	0.00162353	0.0281058
Ndufb6	1111.13	-0.142152	0.045943	-3.09409	0.00197414	0.0324223
Lgi3	8438.22	-0.142127	0.0443891	-3.20185	0.00136548	0.0247103
Tubg1	983.331	-0.141509	0.0475048	-2.97883	0.00289352	0.0430692
Podxl2	5537.46	-0.141257	0.0396177	-3.5655	0.00036316	0.00867071
Clasp1	4220.24	-0.141178	0.0417572	-3.38092	0.000722426	0.0149573
Ndufs7	1996.3	-0.140538	0.0391421	-3.59045	0.000330104	0.00804421
Ppp1r3f	958.416	-0.140182	0.0479226	-2.92518	0.00344253	0.0490323
Nsg1	6681.41	-0.140011	0.0478507	-2.926	0.00343353	0.0489549
Camk2g	11083.8	-0.139824	0.0351488	-3.97806	6.95e-05	0.00227765
Faim2	20202.6	-0.139773	0.035907	-3.89265	9.92e-05	0.00304505
Smyd2	1873.15	-0.139718	0.046334	-3.01546	0.00256589	0.0393434
Ipo11	1148.32	-0.139598	0.0473743	-2.94671	0.00321178	0.046671
Dst	21402	-0.13952	0.0352368	-3.95949	7.51e-05	0.00241906
Map1lc3a	2701.67	-0.139121	0.0452151	-3.07687	0.0020919	0.0338846
Kndc1	9329.52	-0.138588	0.0350091	-3.95862	7.54e-05	0.00242318
Ccdc91	1521.89	-0.138362	0.0462779	-2.98981	0.0027915	0.0419758
Ache	5192.54	-0.137522	0.0374095	-3.67613	0.000236802	0.00618079
Slc6a9	7932.54	-0.136905	0.0463633	-2.95286	0.0031484	0.0459522
Dpysl3	3112.18	-0.136425	0.0427271	-3.19295	0.00140828	0.0253737
Scn1b	6803.02	-0.136296	0.0438271	-3.10986	0.00187178	0.0311123
Sh3glb2	3907.18	-0.136051	0.0393419	-3.45817	0.000543863	0.0120705
Dmtn	4516	-0.135425	0.0357301	-3.79023	0.000150505	0.00427212
Npdc1	3229.43	-0.135329	0.0427806	-3.16334	0.00155973	0.0274731
Aplp1	35841	-0.135254	0.0443247	-3.05144	0.00227749	0.0359395
Fam219a	4172.63	-0.135225	0.0344091	-3.92993	8.5e-05	0.00267913
Ina	8131.53	-0.135094	0.0419145	-3.22309	0.00126817	0.0233067
Zdhhc3	2716.96	-0.135074	0.0396076	-3.4103	0.000648921	0.0138598
Mapk8ip1	10052.8	-0.13499	0.0357585	-3.77505	0.000159973	0.00449503
Sacs	3325.52	-0.134978	0.0462871	-2.9161	0.00354439	0.0499236
Creg2	2018.64	-0.134917	0.0390911	-3.45136	0.000557766	0.0122708
H1f0	2496.81	-0.134901	0.0415533	-3.24644	0.00116857	0.0220149
Atp5d	3485.95	-0.133984	0.044123	-3.03659	0.00239269	0.0373295
Rtl8c	3103.77	-0.133928	0.0355408	-3.76829	0.000164367	0.00460284
Lgi1	2090.11	-0.133698	0.034278	-3.9004	9.6e-05	0.00296569
Ncoa7	2217.11	-0.133447	0.0393668	-3.38984	0.000699334	0.0145889
Creld1	1761.78	-0.133429	0.0423137	-3.15333	0.00161417	0.0281026
Uchl1	11872	-0.13311	0.0400749	-3.32154	0.000895228	0.0179736
Ube2o	5265.87	-0.13297	0.0326159	-4.07686	4.56e-05	0.00161168
Yipf3	1096.52	-0.132338	0.0433358	-3.05377	0.00225985	0.0356953
Kcnab3	2682.47	-0.132132	0.0448985	-2.9429	0.00325155	0.0471247
Micu1	2181.83	-0.131604	0.0415774	-3.16527	0.00154938	0.0273784
Ppp1r13b	1940.59	-0.131546	0.043828	-3.00141	0.00268731	0.0408085
Usp5	5644.14	-0.131318	0.0364351	-3.60417	0.00031315	0.00775691
Gm15612	2331.73	-0.131001	0.0439772	-2.97884	0.00289346	0.0430692
Fkbp8	5853.83	-0.130924	0.0329685	-3.97118	7.15e-05	0.00232148
Cltb	4400.42	-0.130792	0.0341199	-3.8333	0.000126438	0.00369082
Reep2	2470.99	-0.130679	0.0397528	-3.28728	0.00101159	0.019663
Agtpbp1	4018.88	-0.130355	0.0416235	-3.13175	0.00173765	0.0294154
Acss2	2184.64	-0.130071	0.0435302	-2.98807	0.00280745	0.0421297
Tnk2	10081.4	-0.129869	0.0382497	-3.3953	0.000685535	0.0143919
Dhdds	2329.44	-0.129648	0.0434409	-2.98447	0.0028407	0.0424921
Prkcz	3612.99	-0.129291	0.0361477	-3.57675	0.00034789	0.00835442
Map6	3912.81	-0.129073	0.0388597	-3.32151	0.000895308	0.0179736
Agl	2463.1	-0.128588	0.0440867	-2.91671	0.0035375	0.0498691
Hdlbp	7063.99	-0.128326	0.0357381	-3.59073	0.000329759	0.00804421
Copg1	9817.75	-0.128322	0.0345998	-3.70875	0.000208285	0.00556843
Prkaca	6294.06	-0.128177	0.0385085	-3.32855	0.000873002	0.0176762
Wdtc1	2163.86	-0.127828	0.0433016	-2.95204	0.00315684	0.0459942
Asph	3503.59	-0.126372	0.0425814	-2.96777	0.00299973	0.0443305
Kcnh2	3551.98	-0.125654	0.040398	-3.11041	0.00186827	0.0310851
Tln2	5332.25	-0.125611	0.0360202	-3.48725	0.000488021	0.0110227
Fbxo44	2948.86	-0.125533	0.0409493	-3.06557	0.00217258	0.0346816
Emc10	4078.63	-0.12533	0.0334222	-3.7499	0.000176902	0.00488758
Plbd2	3413.69	-0.125139	0.0411824	-3.03866	0.00237629	0.0371439
Ccdc136	2532.44	-0.125044	0.0425289	-2.94021	0.00327995	0.04737
Tecr	10836.1	-0.124711	0.0344221	-3.623	0.000291203	0.00733424
Sez6l2	16208.1	-0.123939	0.0387018	-3.2024	0.00136286	0.0246899
Tbc1d9b	7714.34	-0.123938	0.036018	-3.44101	0.000579539	0.0126155
Tmem150c	1700.07	-0.123835	0.0400287	-3.09366	0.00197704	0.0324375
Rims1	2462.4	-0.123524	0.0347927	-3.55029	0.000384808	0.0090696
Ggt7	3124.14	-0.123464	0.0413396	-2.98659	0.00282108	0.0422957
Cope	1767	-0.122678	0.0406034	-3.02137	0.00251633	0.0388107
Sptan1	25737.7	-0.122551	0.0387573	-3.162	0.0015669	0.0275153
Kif5a	57503.5	-0.122413	0.0326712	-3.74682	0.000179094	0.00493164
Rab4b	1529.56	-0.122096	0.04179	-2.92165	0.00348178	0.0494528
Gphn	1864.46	-0.122079	0.0376362	-3.24365	0.0011801	0.0221061
Lrp3	2589.63	-0.121572	0.0370091	-3.28492	0.00102011	0.0197589
Ndufa13	2594.24	-0.120463	0.0367624	-3.27679	0.00104994	0.020218
Fxr2	3783.06	-0.120319	0.0372909	-3.22649	0.00125317	0.0231587
Dnm3	8555.65	-0.120234	0.0369868	-3.25073	0.00115109	0.021785
Mcf2l	3519.06	-0.119091	0.0364787	-3.26468	0.00109588	0.0209804
Slc27a4	2865.46	-0.119028	0.039898	-2.98331	0.00285153	0.0425592
Tle5	10816.3	-0.118961	0.0338792	-3.51134	0.00044586	0.0102171
Copg2	2564.02	-0.118936	0.0381409	-3.11832	0.00181885	0.0304777
Snn	5941.77	-0.118326	0.0357717	-3.30781	0.000940272	0.018646
Hint1	2919.29	-0.118078	0.0402829	-2.93122	0.00337634	0.0484357
Insyn1	2334.8	-0.116232	0.0388518	-2.99167	0.00277453	0.0419019
Camta2	4716.17	-0.115858	0.03601	-3.21738	0.00129369	0.0236966
Tmtc1	2685.99	-0.114494	0.0380208	-3.01134	0.00260096	0.039753
Scamp1	5749.37	-0.114314	0.0360154	-3.17404	0.00150331	0.0266784
Mapre3	3801.96	-0.113576	0.035139	-3.23219	0.00122846	0.0228052
Mapk6	2919.58	-0.112303	0.0355124	-3.16237	0.00156493	0.0275153
Csnk1g2	2756.35	-0.112232	0.0328642	-3.41502	0.000637774	0.0137126
Calm1	48700.7	-0.111873	0.0376646	-2.97025	0.00297555	0.0440613
Sms	3054.11	-0.109918	0.0369898	-2.97159	0.00296267	0.04394
Wbp2	8601.14	-0.109703	0.0348135	-3.15116	0.00162621	0.0281058
Atp13a2	5369.41	-0.109686	0.034188	-3.2083	0.0013352	0.0242419
Fnbp1	9167.89	-0.109578	0.0345667	-3.17006	0.00152409	0.0269604
Dynlrb1	1904.94	-0.10899	0.036803	-2.96144	0.00306201	0.0450897
Apba2	3641.28	-0.108701	0.0308956	-3.51834	0.000434256	0.0100067
Gpx4	3978.45	-0.108627	0.0343797	-3.15962	0.00157973	0.0276486
Myh10	10072	-0.107947	0.0343283	-3.14456	0.00166338	0.028409
Pygb	10819.1	-0.107699	0.0345467	-3.11748	0.00182404	0.0305338
Myl12b	4557.01	-0.106963	0.0330226	-3.2391	0.00119908	0.0223603
Sptbn2	6631.58	-0.106289	0.0322258	-3.29827	0.000972837	0.019087
Spock1	7263.25	-0.104234	0.0283035	-3.68273	0.00023075	0.0060515
Ap2a1	6771.45	-0.104002	0.0341613	-3.04443	0.00233121	0.0365429
Ppfia3	2654.23	-0.103951	0.0344832	-3.01453	0.00257377	0.0394103
Acot7	7966.7	-0.10289	0.0348417	-2.95308	0.00314624	0.0459522
Napa	4356.15	-0.101474	0.0347767	-2.91788	0.00352415	0.0497658
Cdk16	6393.94	-0.101424	0.0332651	-3.04895	0.00229641	0.0361001
Gabra3	3063.3	-0.100917	0.0325446	-3.10088	0.00192949	0.0317837
Mast2	3580.72	-0.100371	0.0342365	-2.93168	0.00337132	0.0484356
Fam120b	2555.41	-0.0977874	0.0320979	-3.04653	0.00231496	0.0363226
Cbx6	6247.4	-0.0969144	0.0310392	-3.12232	0.00179432	0.0301891
Atp9a	9486.89	-0.096384	0.029302	-3.28933	0.00100428	0.01959
Map7d1	7031.7	-0.0960359	0.0321719	-2.98509	0.00283494	0.0424649
Cacnb4	3744.53	-0.0928212	0.0301842	-3.07516	0.00210392	0.0339459
Ap3b2	4282.03	-0.0927801	0.0295067	-3.14437	0.00166444	0.028409
Ppp1r9b	7804.2	-0.0913038	0.030539	-2.98974	0.00279212	0.0419758
Abr	9023.66	-0.0883376	0.0302513	-2.92013	0.00349891	0.049494
Rundc3a	4861.64	-0.0865535	0.028247	-3.06416	0.0021828	0.0347616
