# Supplementary material for: A Transcriptomic Meta-Analysis Shows Lipid Metabolism Dysregulation as an Early Pathological Mechanism in the Spinal Cord of SOD1 Mice
Source: Int J Mol Sci. 2021 Sep 2;22(17):9553. doi: 10.3390/ijms22179553 (PMC8431303; doi:10.3390/ijms22179553)
Supplement: Supplementary file 1 [file ijms-22-09553-s001.zip › Supplementary Files/Table S2 List of lipid genes.xlsx]

## Sheet: Lipid genes
Table S2. List of lipid genes . It was created by the merge of genes annotated with the GO terms "lipid metabolic process" and "lipid transport".
lipid metabolic process (GO:0006629)	lipid transport (GO:0006869)	List lipid genes
NR1D1	SLC27A1	NR1D1
GPAA1	PLSCR2	GPAA1
A0A1B0GV83	PLSCR3	A0A1B0GV83
SLC27A1	BDKRB2	AGPAT3
AGPAT3	LRAT	LDAH
LDAH	SLC51A	ATG14
ATG14	FZD4	ALG9
ALG9	PRKAA2	SERINC1
SERINC1	MAP2K6	TSPOAP1
TSPOAP1	SIRT1	VAPB
VAPB	GRAMD1A	SBF1
SBF1	ATP11B	ADTRP
LRAT	ANO9	NFE2L1
ADTRP	ABCA11P	MT3
NFE2L1	AKR1C4	ATP5F1A
MT3	PRKAB2	FGF1
ATP5F1A	OSBPL5	PIGH
FGF1	TRIAP1	FDX2
PIGH	ABCG4	PDE3A
FDX2	STARD10	CSNK2B
PDE3A	LCN12	GK2
CSNK2B	GOT2	GK3P
GK2	ATP8A1	PLBD1
GK3P	RFT1	HMGCL
PLBD1	SLC27A5	HPGD
HMGCL	SLC27A6	PDXDC2P
PRKAA2	ABCA1	FAR2
HPGD	NFKBIA	ACSM6
PDXDC2P	APOM	PLCXD2
FAR2	APOBR	CACNA1H
ACSM6	PROCA1	MTM1
PLCXD2	PSAP	HSD17B2
CACNA1H	SCP2D1	HSD17B3
MTM1	TAC1	ANGPTL3
HSD17B2	CLN8	CYP7B1
HSD17B3	SLC10A4	PTGR1
ANGPTL3	ATP8B1	ADH1A
SIRT1	TTC39B	ACSF2
CYP7B1	AKR1C1	MAPK3
PTGR1	ATP9B	HACD1
ADH1A	TMEM256-PLSCR3	INPP5B
ACSF2	PRKAG2	PDXDC1
MAPK3	NCOR1	NRBF2
HACD1	VPS4B	PLIN5
INPP5B	vapa-osbp_human	IMPAD1
PDXDC1	anxa2-pcsk9_human	CDS2
NRBF2	GHRL	SIN3B
PLIN5	POMC	PLD4
IMPAD1	OXT	DGAT1
CDS2	EGF	APPL2
SIN3B	LDLR	ACHE
PLD4	PRKCD	SOCS5
DGAT1	P2RX7	IP6K2
APPL2	ATP8B4	NAGA
ACHE	GRAMD1C	B4GALT5
SOCS5	ADIPOQ	INPP1
IP6K2	ABCD3	GRHL1
NAGA	PITPNB	INPP5F
B4GALT5	CD36	COQ2
INPP1	XKR4	ALDH1A3
GRHL1	APOA5	THRA
INPP5F	LIPG	LIAS
COQ2	NCOA2	LYPLA1
ALDH1A3	ANO7	CRLS1
THRA	CPTP	ACSBG1
LIAS	ABCA3	PNPLA2
AKR1C4	SIGMAR1	PIK3R3
LYPLA1	SLCO2B1	SULT1B1
CRLS1	ABCC2	TPTE2
ACSBG1	ABCA8	PLPPR2
PRKAB2	P2RX4	PIK3CB
OSBPL5	PLIN2	HACL1
PNPLA2	SLCO3A1	OLAH
PIK3R3	SFTPA1	EGFR
SULT1B1	LCN1	G0S2
TPTE2	TEX2	HACD2
PLPPR2	GRAMD1B	GPX1
PIK3CB	RPS6KB1	CRYL1
STARD10	OSBPL11	VAPA
HACL1	SLC5A8	ACER2
OLAH	INHBA	CTDNEP1
EGFR	OSBPL1A	SGPL1
G0S2	STOML1	LARGE1
HACD2	CPT2	LPIN1
GPX1	C2CD2L	NCOA6
CRYL1	AGTR2	EFR3B
VAPA	PRELID2	SLC44A5
ACER2	PNLIP	INPP5A
SLC27A5	DISP3	PIGL
SLC27A6	ABCD1	FDXR
ABCA1	SLCO1C1	PDPR
CTDNEP1	LBP	GDPD4
SGPL1	PQLC1	GAL3ST3
LARGE1	ABCB1	SLC16A11
APOM	DRD4	RAB5A
LPIN1	VPS4A	RAB4A
NCOA6	HNRNPK	B4GALT6
APOBR	HDLBP	DAGLB
EFR3B	CPT1C	VAV2
SLC44A5	AGT	CCR7
INPP5A	SLCO2A1	CYP2A7
PROCA1	AKT1	CYB5R3
PSAP	NCOA1	CCKBR
PIGL	ABCA5	LIPF
FDXR	SHH	ALDH1A1
PDPR	ABCA7	CYP3A5
GDPD4	PITPNM1	CERS1
GAL3ST3	K7EP34	EDN2
SCP2D1	SCARB1	IGFBP7
SLC16A11	SSTR4	ADH1C
CLN8	CETP	ADH1B
RAB5A	SORL1	MTMR8
RAB4A	CYP19A1	CYP2R1
B4GALT6	CRH	GPC6
DAGLB	MSR1	ABHD16A
VAV2	ACSL1	FADS2
ATP8B1	ABCA6	SNAI1
CCR7	THRSP	BPNT1
CYP2A7	APOL5	IPMK
CYB5R3	APOL6	NDUFS6
CCKBR	CRHR1	PRKAG3
TTC39B	STRA6	H2AFY
LIPF	GLTP	MLYCD
ALDH1A1	PLSCR5	MPDU1
CYP3A5	CAV1	URS00005BBC98_9606
CERS1	PLA2G10	URS00004E4AD0_9606
EDN2	PLA2G3	URS000075D261_9606
IGFBP7	APOB	URS00001F4E81_9606
ADH1C	ABCA12	pik3c3-atg14_human
ADH1B	PLA2G2F	etfa-etfb_human
MTMR8	PLA2G12A	pik3c3-uvrag_human
CYP2R1	ABCA9	GBA3
AKR1C1	OSBPL6	DKKL1
GPC6	OSBPL7	SEL1L
ABHD16A	OSBPL8	MTMR14
FADS2	PRKN	ST3GAL6
SNAI1	ABCA2	PLA2G15
BPNT1	ATP5PF	TRPV1
IPMK	ESYT2	HTR2C
PRKAG2	ANO3	ADH6
NDUFS6	RXRA	ACADL
PRKAG3	NMUR2	TGFB1
NCOR1	NR1H4	CHAT
H2AFY	SLC10A7	PEX2
MLYCD	NR1H3	PDGFB
MPDU1	MIF	SEC14L2
URS00005BBC98_9606	ATP8B2	PIGO
URS00004E4AD0_9606	VLDLR	EEF1A2
URS000075D261_9606	CHKA	PIK3R5
URS00001F4E81_9606	RBP4	GHSR
pik3c3-atg14_human	APOH	GDPD3
etfa-etfb_human	SLC4A1	DHCR24
vapa-osbp_human	PLSCR1	LIPA
pik3c3-uvrag_human	ACACA	FGFR1
GBA3	NPC1	ACOT12
DKKL1	PLA2R1	ENHO
SEL1L	SPX	ALOX12
MTMR14	APOC3	AOAH
ST3GAL6	APOC2	ACADM
PLA2G15	APOC1	FA2H
TRPV1	APOA2	MSMO1
HTR2C	APOE	CNR1
ADH6	PLA2G4F	PLCG2
ACADL	RELCH	PIK3CG
TGFB1	OSBPL9	HSD17B12
LDLR	NFKB1	AGK
CHAT	CEL	UGT2B7
PEX2	GPS2	PTK2
PDGFB	SPNS2	FAR1
SEC14L2	CPT1B	SF1
PRKCD	SLC22A9	ST8SIA1
PIGO	SLCO1A2	CPNE1
EEF1A2	LEP	B3GALT1
PIK3R5	CFHR4	ORMDL2
GHSR	APOF	TYSND1
P2RX7	ABCA4	LGALS12
GDPD3	FABP6	ALDH3B2
DHCR24	CYP4F2	PIP4K2A
LIPA	PLA2G2A	CCN1
FGFR1	C1QTNF1	SIRT4
ACOT12	ABCC1	FUT6
ENHO	PITPNM2	GNB3
ALOX12	MTTP	PIP5K1A
AOAH	LRP10	SDR42E1
ACADM	NME4	NPAS2
ADIPOQ	IL1B	CCL19
FA2H	UCN	CGA
MSMO1	NPC2	CES3
ABCD3	STX12	ANKRD1
CNR1	APOC4	ENPP7
PLCG2	SLC27A2	NR5A2
PITPNB	FABP4	FLT3
PIK3CG	PTCH1	ENPP6
HSD17B12	STARD5	AGRN
CD36	CPT1A	PIK3R2
AGK	ATP8A2	LCLAT1
UGT2B7	OSBP2	DHRS11
PTK2	ABCC3	PIK3C2A
FAR1	ABCC4	ERLIN2
APOA5	OC90	LPCAT2
SF1	DRD3	CLCN2
ST8SIA1	SREBF2	PIK3R4
LIPG	SLCO1B3	PLCZ1
CPNE1	SERPINA5	RHO
B3GALT1	MFSD2A	LGMN
NCOA2	CYP4A11	CLPSL2
ORMDL2	PLA2G12B	GPER1
CPTP	GALR1	NEU1
TYSND1	APOD	DOLPP1
LGALS12	PLA2G2D	SERPINA6
ALDH3B2	ESYT3	SRD5A2
PIP4K2A	SLC27A4	THNSL2
CCN1	XKR8	NKX1-1
SIRT4	ITGB3	PDSS2
FUT6	SCARB2	COMT
GNB3	SOAT1	CBR1
PIP5K1A	APOL1	SULT2B1
SDR42E1	TNFSF11	PTGS1
NPAS2	PLA2G1B	CYP2J2
CCL19	ANXA1	ACAD11
CGA	ATP10B	P2RX1
CES3	LRP1	RUBCN
ANKRD1	CEACAM1	ADH4
ENPP7	ABCA13	CARM1
NR5A2	NMB	THEM5
FLT3	PLSCR4	LSR
ENPP6	EPRS	GDPD2
AGRN	GDF9	ACOX1
PIK3R2	ATP10A	SLC44A2
LCLAT1	APOLD1	SNX17
DHRS11	STARD7	PNPLA4
PIK3C2A	SPNS3	APOBEC1
ERLIN2	TMEM30CP	LONP2
LPCAT2	CLU	PTGDS
CLCN2	LAMTOR1	PLCB2
PIK3R4	SLC25A17	C1QTNF2
PLCZ1	ABCG5	ALAS1
RHO	ABCG8	A0A087X0B3
PLIN2	OSBPL2	ACBD5
LGMN	ANXA2	ALDH1A2
CLPSL2	PLA2G2C	DHH
GPER1	CRY1	IDI2
NEU1	SYT7	PECR
DOLPP1	ATP9A	ANGPTL4
SERPINA6	SERAC1	LPCAT4
SRD5A2	MID1IP1	PPARGC1A
THNSL2	SOAT2	GBGT1
NKX1-1	PNPLA8	WDTC1
PDSS2	ANO4	CERS5
COMT	AQP9	UGT2B10
CBR1	LOC400499	TMEM150A
SULT2B1	PLEKHA8	PRKD3
PTGS1	STAR	PIGF
CYP2J2	ATP11C	HELZ2
ACAD11	GAL	PLCH1
P2RX1	TTPA	ACOT4
RUBCN	REN	NDUFAB1
ADH4	XKR6	FADS6
CARM1	XKR7	SOCS6
THEM5	XKR9	SOCS3
LSR	FABP2	DGKA
GDPD2	PCTP	SOCS7
TEX2	APOL2	SOCS2
ACOX1	APOL3	CLN6
SLC44A2	PLA2G5	PLAAT2
SNX17	THBS1	CNEP1R1
PNPLA4	ACSL4	PIGS
APOBEC1	ATP8B3	TRIB3
LONP2	IRS2	DPM3
PTGDS	GM2A	ELOVL2
PLCB2	APOL4	PNPLA1
C1QTNF2	AGTR1	ALG12
ALAS1	TNFAIP8L3	PRKCE
A0A087X0B3	OSBPL3	SERINC2
ACBD5	FABP3	PTGR2
ALDH1A2	ATP10D	PLPP3
DHH	PPARD	PLPP1
IDI2	ERFE	PLP1
PECR	MFSD2B	PDP2
ANGPTL4	TMEM30B	PI4KAP1
OSBPL1A	PLA2G2E	GPC1
LPCAT4	LPA	SMPD3
PPARGC1A	SGPP1	FIG4
GBGT1	ABCB4	B4GALNT1
WDTC1	ABCA10	PM20D1
CERS5	SELENOM	ALG8
UGT2B10	ATP11A	SRD5A1
TMEM150A	AKT2	HIBCH
PRKD3	SLC25A20	TIPARP
PIGF	LIPC	AASDH
HELZ2	NKX3-1	PLAAT3
PLCH1	ACACB	PIAS4
ACOT4	PITPNA	PLPPR1
CPT2	ITGAV	GATA6
NDUFAB1	A0A0A6YYJ9	GPD1L
FADS6	APOA4	PEX7
SOCS6	SLCO1B7	GPLD1
SOCS3	ANO6	PIGB
DGKA	SLC10A6	TMEM86A
SOCS7	PLTP	PIGC
SOCS2	NR1H2	LPIN2
CLN6	CES1	MYO5A
PLAAT2	NUS1	INPP5D
CNEP1R1	NTSR1	ABHD12
PIGS	STARD4	NR4A3
TRIB3	COL4A3BP	PPP4R3B
DPM3	SPP1	ETNK1
ELOVL2	SLC10A1	PLD6
PNPLA1	KDM5B	NFYC
ALG12	GLTPD2	PLPPR4
PNLIP	PDZD8	CYP2C19
PRKCE	SLCO1B1	CYP2C18
SERINC2	PLA2G4A	PI4K2B
PTGR2	TNFRSF11A	WDR91
PLPP3	ACSL3	PLCL1
PLPP1	MYB	HTR2A
PLP1	STARD6	C3
DISP3	PON1	SERPINA3
PDP2	FABP1	CDS1
PI4KAP1	OSBP	GDPD5
GPC1	BMP6	CYP4A22
SMPD3	NPC1L1	MPPE1
FIG4	LIMA1	CRAT
B4GALNT1	U3KQG8	GCDH
PM20D1	U3KQE9	GFI1
ABCD1	TMF1	MGLL
ALG8	NOS2	PEX13
SRD5A1	LCAT	TM7SF2
HIBCH	PPARA	ATP5F1B
TIPARP	DRD2	ACLY
AASDH	CFTR	NSDHL
PLAAT3	PRELID3B	INPP5J
PIAS4	LRP6	ETFB
PLPPR1	SLC27A3	PTDSS1
GATA6	VPS51	HSD17B10
GPD1L	PTPN11	FSHB
PEX7	PRELID3A	GAL3ST1
GPLD1	SLC10A2	SDC4
PIGB	ANXA2P2	CEPT1
TMEM86A	ABCG1	PTPMT1
PIGC	APOA1	GLA
LPIN2	PLA2G6	RGN
MYO5A	ESYT1	PLCXD3
INPP5D	TMEM30A	NR0B2
ABHD12	ACE	AWAT2
NR4A3	SYK	CHPT1
PPP4R3B	VAMP7	ABHD15
ETNK1	RETN	GPAT3
HDLBP	APOO	PIK3C2G
PLD6	PLEKHA3	LEPR
NFYC	SLC51B	GPX4
PLPPR4	LDLRAP1	SREBF1
CYP2C19	KCNN4	RDH10
CYP2C18	OSBPL10	PRLR
PI4K2B	ARV1	DGKB
CPT1C	PITPNC1	FAAH
WDR91	SCP2	ABHD3
PLCL1	STARD3	PTPRN2
HTR2A	PRELID1	ANGPTL8
C3	GULP1	RACK1
AGT	PLEKHA8P1	ABHD5
SERPINA3	TSPO	NR0B1
CDS1	ABCB11	MORC2
GDPD5	PPARG	EBP
CYP4A22	CROT	PMVK
MPPE1	PCSK9	SP1
CRAT	EDN1	GBA2
GCDH	UGCG	INS
GFI1	SPNS1	CES2
MGLL		NSMAF
AKT1		PHOSPHO1
PEX13		PIGK
TM7SF2		GPAM
ATP5F1B		POR
NCOA1		SGPP2
ACLY		HEXA
NSDHL		LPL
INPP5J		AKR1D1
ETFB		CYP2A6
PTDSS1		ZP3
HSD17B10		MVD
FSHB		CRPPA
GAL3ST1		NR1I2
SDC4		GPC2
CEPT1		LHB
PTPMT1		ORMDL3
GLA		ACOX2
RGN		ALDH3B1
PLCXD3		PC
NR0B2		PAFAH2
SHH		VDR
AWAT2		INSIG1
CHPT1		CD74
ABHD15		PDP1
GPAT3		RGL1
PIK3C2G		ACOT7L
PITPNM1		STS
LEPR		PNPLA7
GPX4		ORMDL1
SREBF1		EPHX2
RDH10		WWOX
PRLR		GDE1
DGKB		FGR
FAAH		PHYH
SCARB1		ARF3
ABHD3		CAV3
PTPRN2		EIF6
ANGPTL8		ACAT2
RACK1		ST8SIA5
ABHD5		MGST3
NR0B1		PLD1
MORC2		A0A286YEZ7
EBP		PDE3B
PMVK		CYP26C1
SP1		PLCB3
GBA2		OCRL
INS		HAO2
CES2		ELOVL5
NSMAF		TECR
PHOSPHO1		NCEH1
PIGK		CLPS
GPAM		A0A286YES4
CETP		A0A286YF41
SORL1		ADIPOR2
POR		AACS
SGPP2		SESN2
HEXA		GPAT4
LPL		PRKD2
CYP19A1		TBL1XR1
CRH		MVK
AKR1D1		CYP2D7
CYP2A6		ACSM5
ZP3		CERS3
MVD		RETSAT
ACSL1		PSAPL1
CRPPA		GPAT2
NR1I2		RBL2
GPC2		ACOT1
LHB		CYP2F1
ORMDL3		TTC7B
ACOX2		LACTB
ALDH3B1		MTMR3
THRSP		MTMR2
PC		MTMR1
PAFAH2		MBOAT2
VDR		ASPG
INSIG1		PIP5KL1
CD74		ALG10
PDP1		TBL1X
APOL5		SMPD2
RGL1		TGS1
STRA6		ALOX15B
ACOT7L		GAL3ST4
STS		LMF1
PNPLA7		FGF23
ORMDL1		SPTLC2
EPHX2		SPTLC1
GLTP		NR2F2
WWOX		CYP3A7
GDE1		GDPD1
FGR		BBS4
CAV1		ELOVL4
PHYH		CSNK2A2
PLA2G10		OXSM
ARF3		GNPAT
CAV3		DHRS4
EIF6		PRKAA1
ACAT2		REST
ST8SIA5		GK5
MGST3		PI4K2A
PLD1		EHHADH
A0A286YEZ7		UCP3
PDE3B		GC
CYP26C1		AFP
PLCB3		EDF1
OCRL		MCEE
HAO2		INPP4A
PLA2G3		DGAT2
ELOVL5		ACER3
TECR		IP6K3
NCEH1		PLCXD1
CLPS		DECR2
APOB		PLPPR3
A0A286YES4		PRLH
A0A286YF41		CRABP1
ADIPOR2		PIGV
AACS		UGT1A9
SESN2		SLC35C1
GPAT4		PNLIPRP3
PLA2G2F		GSTP1
PLA2G12A		DGAT2L6
PRKD2		ECHDC1
TBL1XR1		PLCD4
MVK		PIGQ
OSBPL6		CYP4F8
OSBPL7		FAM3A
OSBPL8		LRP2
CYP2D7		HSPG2
ABCA2		SRD5A3
ACSM5		FABP5
CERS3		GGT1
RETSAT		TNFRSF1A
PSAPL1		HMGCS2
ESYT2		THEM4
GPAT2		CYP17A1
RBL2		CIDEA
ACOT1		PIKFYVE
CYP2F1		RBP1
TTC7B		AIG1
LACTB		PLA2G7
MTMR3		CPNE7
MTMR2		DEGS1
MTMR1		AGPAT2
MBOAT2		PRPF19
ASPG		SRC
PIP5KL1		MTMR9
ALG10		ECH1
TBL1X		ALKBH7
SMPD2		LIPI
TGS1		ETNK2
ALOX15B		HSD17B1
GAL3ST4		HSD3B1
LMF1		DPM1
FGF23		HPGDS
SPTLC2		ATM
SPTLC1		CYP39A1
NR2F2		ELOVL1
CYP3A7		SCT
GDPD1		GIP
RXRA		FDPS
BBS4		MTMR4
ELOVL4		SPHK1
CSNK2A2		CREM
OXSM		SIN3A
GNPAT		RUFY1
NR1H4		ST6GALNAC5
DHRS4		DLD
NR1H3		PTDSS2
PRKAA1		PDGFRB
REST		CYP2S1
GK5		GSTM4
PI4K2A		RAB14
EHHADH		HDAC3
UCP3		INPPL1
MIF		TBXAS1
GC		PDGFA
AFP		CLN3
EDF1		NR5A1
MCEE		FUCA1
INPP4A		DHRS2
DGAT2		CAT
ACER3		HMGCR
IP6K3		ABHD1
PLCXD1		ACSM2B
DECR2		ACOT7
PLPPR3		CSNK2A1
PRLH		SERPINA12
CRABP1		NOD2
PIGV		PIP4K2C
UGT1A9		AGPS
SLC35C1		ALOX15
PNLIPRP3		MCAT
GSTP1		JAZF1
DGAT2L6		SGMS1
ECHDC1		IP6K1
PLCD4		AUH
PIGQ		ENPP2
CYP4F8		RORC
FAM3A		CYP4F11
LRP2		RDH11
HSPG2		TPRA1
SRD5A3		RDH14
VLDLR		MMAA
FABP5		TIAM2
GGT1		ETNPPL
TNFRSF1A		PIGX
HMGCS2		PRXL2B
THEM4		MOGAT3
CHKA		ST8SIA6
CYP17A1		SERINC5
CIDEA		PIGZ
PIKFYVE		BCO1
RBP4		PIGG
APOH		UGT1A8
RBP1		UGT1A7
PLSCR1		CYP3A43
AIG1		ACOT11
PLA2G7		ITGB8
CPNE7		LTA4H
ACACA		CYP4V2
DEGS1		ALOXE3
AGPAT2		FAM126A
PRPF19		ALPI
NPC1		ALOX5
SRC		B3GNT5
MTMR9		GGT5
ECH1		WNT4
ALKBH7		HSD17B13
LIPI		DGKZ
ETNK2		FADS2P1
HSD17B1		PLCD1
HSD3B1		CSNK1G2
DPM1		SERINC3
HPGDS		PIP4K2B
APOC3		ASAH1
APOC2		CECR5
APOC1		RAB7A
APOA2		UGT2B28
APOE		DHDDS
ATM		PIP4P1
CYP39A1		TMEM86B
ELOVL1		HACD3
PLA2G4F		EBPL
SCT		SCD5
GIP		HSD11B2
FDPS		PAFAH1B2
MTMR4		HSD11B1
SPHK1		CBR4
CREM		BTN2A1
OSBPL9		ZADH2
SIN3A		ABO
RUFY1		PITPNM3
ST6GALNAC5		BCO2
DLD		FITM1
PTDSS2		SLC44A3
PDGFRB		B3GALT4
CYP2S1		PIP4P2
GSTM4		PGP
RAB14		GLT6D1
HDAC3		CDK4
INPPL1		SLC16A1
TBXAS1		RDH5
PDGFA		CERS4
CLN3		IL1RN
NR5A1		AKR1B15
FUCA1		WNT10B
DHRS2		SDR16C5
CAT		ECHDC2
HMGCR		IFNG
NFKB1		RBL1
CEL		ALG11
ABHD1		IAH1
ACSM2B		NKX2-1
GPS2		LRCOL1
ACOT7		ME1
SPNS2		GLB1
CSNK2A1		DDHD2
SERPINA12		PIK3CD
NOD2		FAM126B
PIP4K2C		AGAP2
AGPS		ETFBKMT
ALOX15		PDGFRA
MCAT		PLPP6
JAZF1		PNPLA6
SGMS1		CREB1
PIK3R3		AVP
IP6K1		ACADS
CPT1B		HCAR2
AUH		HSD17B4
ENPP2		GPC3
RORC		PCYT2
CYP4F11		ALDH5A1
RDH11		SIRT2
TPRA1		DGKH
RDH14		PLA2G4D
MMAA		MECP2
TIAM2		GSTA1
ETNPPL		AWAT1
PIGX		PLAAT1
PRXL2B		IVD
MOGAT3		PTGES3
ST8SIA6		HSD3B2
SERINC5		PPP2R5A
PIGZ		PON3
BCO1		PON2
PIGG		PLCB4
LEP		G6PC
UGT1A8		IRS1
UGT1A7		PCK1
CYP3A43		ZBTB20
ACOT11		PLD2
APOF		UGT1A3
ITGB8		ACER1
LTA4H		CCDC3
CYP4V2		PANK2
ALOXE3		TTR
FAM126A		SULT4A1
ALPI		ST6GALNAC6
ALOX5		SPTSSA
B3GNT5		NFYB
GGT5		ETFA
WNT4		SACM1L
HSD17B13		CHD9
DGKZ		PIGT
FADS2P1		PGAP1
PLCD1		SCAP
CSNK1G2		FBXW7
ABCA4		CYP2E1
SERINC3		CYP1A2
FABP6		ZNF202
PIP4K2B		TFCP2L1
ASAH1		PCCB
CECR5		PCCA
RAB7A		LPGAT1
CYP4F2		ISYNA1
UGT2B28		ST6GALNAC4
DHDDS		PPP2CA
PIP4P1		IL4
TMEM86B		CYP11A1
HACD3		CD19
EBPL		SFTPB
PLA2G2A		PLCB1
SCD5		ANG
HSD11B2		PLAAT5
PAFAH1B2		APP
HSD11B1		ATP6V1B1
CBR4		ST8SIA2
BTN2A1		PTK2B
ZADH2		ATP1A1
ABO		ELOVL6
PITPNM3		PBX1
PITPNM2		GALC
BCO2		ARSA
FITM1		ELOVL7
MTTP		PIPSL
SLC44A3		CLPSL1
B3GALT4		ASAH2
PIP4P2		UGT2B15
PGP		AMBRA1
GLT6D1		DEGS2
CDK4		PPP2R1A
SLC16A1		ACADSB
RDH5		BCL11B
CERS4		WDR81
IL1RN		SPHK2
AKR1B15		FAM135A
LRP10		FHL2
WNT10B		PLB1
SDR16C5		SCARF1
IL1B		EFR3A
ECHDC2		TEK
IFNG		ADH7
RBL1		LRP8
ALG11		OPA3
IAH1		ACOX3
NKX2-1		LPCAT3
LRCOL1		INPP5E
NPC2		CWH43
ME1		SIK1
GLB1		PIGP
DDHD2		ACSS1
PIK3CD		HNF4A
FAM126B		SDR42E2
AGAP2		ACSBG2
ETFBKMT		CYP27B1
PDGFRA		RORA
PLPP6		SDC2
PNPLA6		MOGAT1
CREB1		TPP1
AVP		HSD17B6
ACADS		PTGS2
HCAR2		GBA
HSD17B4		CERK
GPC3		CDIPT
PCYT2		IMPA2
ALDH5A1		ADM
SIRT2		CYP24A1
DGKH		SULT1A2
PLA2G4D		SULT1A1
MECP2		FPR2
GSTA1		PTEN
AWAT1		ACOD1
PLAAT1		INPP5K
IVD		ID2
PTGES3		TM6SF2
HSD3B2		ADRA2A
PPP2R5A		CHRM5
APOC4		MBOAT1
PON3		AGMO
PON2		KLF4
PLCB4		RUBCNL
SLC27A2		PLA2G4C
G6PC		SLA2
IRS1		PPT1
FABP4		PRKAG1
PCK1		AADAC
ZBTB20		PIP5K1C
PLD2		DGAT2L7P
UGT1A3		AGPAT4
ACER1		FAAH2
CCDC3		SAMD8
PI4K2B		MTMR12
CPT1A		CERS6
PANK2		PIGN
TTR		SELENOI
SULT4A1		CYP26B1
ST6GALNAC6		PLCG1
SPTSSA		FGF21
NFYB		CYP8B1
ETFA		ACSS2
SACM1L		PIK3R6
OC90		ST3GAL5
CHD9		PLAGL2
PIGT		SULT1E1
DRD3		ST8SIA3
PGAP1		CYP7A1
SREBF2		TYRP1
SCAP		ALOX12B
FBXW7		GPX5
CYP2E1		PEMT
CYP1A2		DHCR7
ZNF202		PYURF
TFCP2L1		B3GALT2
PCCB		DKK3
PCCA		CYB5R2
LPGAT1		STOML2
ISYNA1		SH3YL1
ST6GALNAC4		PLAA
MFSD2A		P2RY12
PPP2CA		DAB2IP
IL4		FMC1
CYP11A1		CSF1R
CYP4A11		MAPK14
PLA2G12B		ESR1
CD19		ACAA2
SFTPB		RPE65
PLCB1		ADIPOR1
ANG		HAO1
PLAAT5		HACD4
APP		ACOT2
ATP6V1B1		ACP6
ST8SIA2		ACADVL
APOD		FDX1
PTK2B		XBP1
PLA2G2D		CEBPA
ATP1A1		A4GALT
ELOVL6		CPNE3
PBX1		GPCPD1
ESYT3		IMPA1
GALC		SLC45A3
ARSA		DGKI
ELOVL7		DHRS3
PIPSL		LIPM
CLPSL1		ST3GAL4
ASAH2		PLA2G4B
UGT2B15		ASAH2B
AMBRA1		PEX11A
DEGS2		PIGU
PPP2R1A		SULT2A1
ACADSB		RLBP1
BCL11B		PIGM
WDR81		ALG13
SPHK2		MLXIPL
FAM135A		ACSM4
SLC27A4		GAL3ST2
FHL2		ACBD3
PLB1		TTC7A
SCARF1		DGKD
EFR3A		MALRD1
TEK		DPAGT1
ADH7		PNLIPRP2
LRP8		PNLIPRP1
OPA3		FGFR4
ACOX3		A0A0G2JQS4
LPCAT3		IDH1
INPP5E		SULT1A4
CWH43		DGKG
SOAT1		SC5D
SIK1		FAXDC2
PIGP		FUT7
ACSS1		ACSL5
HNF4A		FUT5
SDR42E2		A0A1B0GU76
ACSBG2		PIK3R1
CYP27B1		DECR1
RORA		CYP2A13
SDC2		F2
APOL1		CYP1B1
MOGAT1		AJUBA
TPP1		PDK4
HSD17B6		PTGIS
PTGS2		LIPK
PLA2G1B		TAZ
GBA		LIPN
CERK		HTRA2
CDIPT		PCYT1A
IMPA2		DHRS7B
ANXA1		HSD3B7
ADM		UGT2B17
CYP24A1		LPIN3
LRP1		CREBL2
SULT1A2		B4GALT4
SULT1A1		B4GALT3
FPR2		PTGES2
CEACAM1		RDH12
PTEN		ACAA1
ACOD1		ACAD9
INPP5K		TREX1
ID2		BMP2
TM6SF2		PNPLA3
ADRA2A		OPN1SW
CHRM5		LYN
MBOAT1		PLCL2
AGMO		DOLK
KLF4		HSD17B14
RUBCNL		DHRS9
PLA2G4C		PIBF1
SLA2		V9GYW3
PPT1		CUBN
PRKAG1		FADS1
AADAC		FGF2
PIP5K1C		CRABP2
DGAT2L7P		PGS1
AGPAT4		FGFR3
FAAH2		FLT1
SAMD8		STUB1
MTMR12		AKR1B10
CERS6		PLPP4
PIGN		CERKL
STARD7		ALG2
SELENOI		CYP11B2
CYP26B1		HTD2
PLCG1		HEXB
FGF21		NEU3
CYP8B1		TXNRD1
ACSS2		UGT8
PIK3R6		LTC4S
ST3GAL5		PLEKHA4
PLAGL2		CYP51A1
SULT1E1		PAM
ST8SIA3		ST3GAL2
CYP7A1		HADH
TYRP1		PCK2
ALOX12B		SERINC4
CLU		CYP21A2
GPX5		CYP3A4
PEMT		NAAA
DHCR7		ACSF3
LAMTOR1		PLCE1
PYURF		CYP27C1
B3GALT2		IDI1
DKK3		RDH8
CYB5R2		PI4KAP2
SLC25A17		NFYA
STOML2		SDC1
SH3YL1		A0A087X1B8
PLAA		PIGW
P2RY12		PLA2G4E
DAB2IP		PLEK
FMC1		PNPLA5
OSBPL2		SORBS1
CSF1R		HINT2
PLA2G2C		CD81
MAPK14		FITM2
ESR1		FABP12
ACAA2		GSTM2
RPE65		GPC5
ADIPOR1		LIPH
HAO1		EPHX3
HACD4		LIPE
ACOT2		RARRES2
ACP6		MGST2
ACADVL		AGPAT1
FDX1		NCOR2
XBP1		NEU4
CEBPA		BRCA1
SERAC1		PAFAH1B1
A4GALT		CYGB
CPNE3		VAC14
GPCPD1		ACSM3
MID1IP1		SLC44A1
IMPA1		TWIST1
SLC45A3		ACSM2A
DGKI		ACSM1
DHRS3		MED1
SOAT2		RB1
LIPM		SLC44A4
ST3GAL4		PLA1A
PLA2G4B		SCD
ASAH2B		INSIG2
PEX11A		PIK3C2B
PIGU		PROX1
SULT2A1		CREBBP
RLBP1		FUT3
PNPLA8		EGR1
PIGM		G6PD
ALG13		GPD1
MLXIPL		LSS
ACSM4		NKX2-3
GAL3ST2		CCL21
ACBD3		ADH5
TTC7A		DGKK
DGKD		PLEKHA1
MALRD1		V9GY18
PLEKHA8		PLCD3
DPAGT1		SCPEP1
STAR		ALDH3A2
GAL		CYP2C9
PNLIPRP2		SYNJ1
PNLIPRP1		TECRL
FGFR4		ALG6
TTPA		PISD
A0A0G2JQS4		DNAJC15
IDH1		ETFDH
SULT1A4		ACOT6
DGKG		FADS3
SC5D		RAN
FAXDC2		PI4KA
FUT7		OMA1
ACSL5		MTOR
FUT5		PIK3CA
A0A1B0GU76		STARD3NL
PIK3R1		AKR1C3
DECR1		FGF19
CYP2A13		PCYT1B
F2		GGPS1
CYP1B1		CPNE6
AJUBA		NR1D2
FABP2		KPNB1
PDK4		ZMPSTE24
PTGIS		SPTSSB
LIPK		PIK3IP1
TAZ		DDHD1
LIPN		DGKE
HTRA2		ACAD10
PCYT1A		CYB5R1
DHRS7B		NUDT7
PCTP		E9PAM4
HSD3B7		PGAP3
UGT2B17		PRKAB1
LPIN3		PIK3C3
CREBL2		PLPP5
B4GALT4		CERS2
B4GALT3		NEU2
PTGES2		CNBP
RDH12		ECI1
ACAA1		BSCL2
APOL2		SULT1A3
PLA2G5		ST6GALNAC3
ACAD9		PLIN1
TREX1		SDC3
BMP2		HSD17B8
PNPLA3		PLCH2
OPN1SW		CYP26A1
LYN		ALG10B
PLCL2		LBR
DOLK		MBTPS1
HSD17B14		HADHA
DHRS9		GALR2
PIBF1		LGALS13
V9GYW3		SLC22A4
CUBN		SOD1
ACSL4		CYP2B6
FADS1		GSTZ1
FGF2		DBI
IRS2		TH
CRABP2		CH25H
PGS1		YWHAH
FGFR3		PPM1L
FLT1		ALG1
STUB1		AMACR
AKR1B10		TAMM41
PLPP4		B4GALNT2
GM2A		PGAP2
APOL4		GPC4
AGTR1		DDX20
CERKL		SNCA
ALG2		ERLIN1
CYP11B2		MMUT
HTD2		CYP2D6
HEXB		CYP2C8
NEU3		SGMS2
TXNRD1		RDH16
UGT8		CTSA
LTC4S		BMP5
TNFAIP8L3		PLBD2
PLEKHA4		FABP9
CYP51A1		ALG14
OSBPL3		ABHD2
PAM		CYP27A1
ST3GAL2		PTGES
HADH		CYP1A1
PCK2		TMEM38B
FABP3		CYP4F3
SERINC4		RBP2
CYP21A2		BAX
CYP3A4		CCDC71L
NAAA		RBP3
ACSF3		FASN
PLCE1		KIT
PPARD		PLPP2
CYP27C1		AKR1C2
IDI1		ECI2
ERFE		TNFRSF21
RDH8		SMPD1
PI4KAP2		KDSR
NFYA		SNAI2
SDC1		DGKQ
A0A087X1B8		AKR1B1
PIGW		PTPN13
PLA2G4E		ECHS1
PLEK		MBOAT7
PNPLA5		PRDX6
SORBS1		CISH
HINT2		HSD17B7
CD81		NUDT19
PLA2G2E		BAAT
LPA		INPP4B
SGPP1		PIP5K1B
FITM2		QKI
FABP12		SMARCD3
ABCB4		SMG1
GSTM2		ACOXL
GPC5		TRERF1
LIPH		PDSS1
EPHX3		SYNJ2
LIPE		PER2
RARRES2		SPTLC3
MGST2		HMGCS1
AGPAT1		AKR1C8P
NCOR2		AGPAT5
NEU4		BMX
BRCA1		GLYATL2
AKT2		CPS1
PAFAH1B1		PRKAR2B
CYGB		ADGRF5
VAC14		A0A0G2JRU3
LIPC		MOGAT2
ACSM3		TNF
SLC44A1		WASHC1
TWIST1		FAM57B
ACSM2A		HTR2B
ACSM1		A3GALT2
MED1		HADHB
RB1		PRKD1
SLC44A4		CRTC3
PLA1A		PDK3
SCD		PDK2
ACACB		PDK1
INSIG2		PAFAH1B3
PIK3C2B		DPM2
PROX1		GLIPR1
CREBBP		CYP4F12
FUT3		ALG3
PITPNA		OPN1MW
EGR1		OPN1LW
G6PD		MECR
APOA4		CYP2G1P
GPD1		BDH2
LSS		ABHD6
PLTP		SMPD4
NR1H2		CRKL
NKX2-3		CRK
CCL21		SMPDL3B
ADH5		HMGCLL1
CES1		PLEKHA2
DGKK		NAA40
PLEKHA1		ELOVL3
V9GY18		CYP2U1
PLCD3		GPIHBP1
SCPEP1		PLD3
ALDH3A2		ABHD4
CYP2C9		NAPEPLD
SYNJ1		PLPPR5
TECRL		CES5A
ALG6		ACOT8
PISD		PLAAT4
DNAJC15		FABP7
NUS1		ACAT1
ETFDH		ST8SIA4
STARD4		SOCS1
ACOT6		PI4KB
FADS3		ALDH8A1
RAN		B3GALNT1
COL4A3BP		CAPN2
PI4KA		UGT1A1
OMA1		URS000075B66E_9606
MTOR		LPCAT1
PIK3CA		DAGLA
STARD3NL		MBTPS2
AKR1C3		UGT2B11
FGF19		GK
PCYT1B		CYP46A1
GGPS1		CHKB
SPP1		PIGY
CPNE6		LIPT1
NR1D2		CES4A
KPNB1		MTMR6
ZMPSTE24		MTMR7
SPTSSB		AVPR1A
PIK3IP1		PIGA
DDHD1		LYPLA2
DGKE		ADORA1
ACAD10		FDFT1
CYB5R1		RAB38
NUDT7		ABCD2
E9PAM4		SCCPDH
PLA2G4A		ARF1
PGAP3		EPHA8
PRKAB1		CYP3A7-CYP3A51P
PIK3C3		HSD17B11
PLPP5		SQLE
CERS2		RDH13
NEU2		ALOX5AP
CNBP		LIPJ
ACSL3		FAM135B
ECI1		SUMF1
BSCL2		ERG28
SULT1A3		SUMF2
ST6GALNAC3		GOLM1
PLIN1		ACSL6
SDC3		ACAD8
HSD17B8		VAV3
PLCH2		CYP11B1
CYP26A1		A0A0G2JPK8
ALG10B		CES1P1
LBR		ZFP69
MBTPS1		SLC27A1
HADHA		LRAT
PON1		PRKAA2
GALR2		SIRT1
LGALS13		AKR1C4
SLC22A4		PRKAB2
SOD1		OSBPL5
CYP2B6		STARD10
GSTZ1		SLC27A5
FABP1		SLC27A6
DBI		ABCA1
TH		APOM
CH25H		APOBR
YWHAH		PROCA1
PPM1L		PSAP
ALG1		SCP2D1
AMACR		CLN8
TAMM41		ATP8B1
OSBP		TTC39B
B4GALNT2		AKR1C1
PGAP2		PRKAG2
GPC4		NCOR1
DDX20		vapa-osbp_human
SNCA		LDLR
ERLIN1		PRKCD
MMUT		P2RX7
CYP2D6		ADIPOQ
CYP2C8		ABCD3
SGMS2		PITPNB
RDH16		CD36
CTSA		APOA5
BMP6		LIPG
BMP5		NCOA2
NPC1L1		CPTP
LIMA1		PLIN2
PLBD2		TEX2
FABP9		OSBPL1A
ALG14		CPT2
ABHD2		PNLIP
CYP27A1		DISP3
PTGES		ABCD1
CYP1A1		HDLBP
LCAT		CPT1C
TMEM38B		AGT
CYP4F3		AKT1
PPARA		NCOA1
RBP2		SHH
BAX		PITPNM1
CCDC71L		SCARB1
CFTR		CETP
SLC27A3		SORL1
RBP3		CYP19A1
FASN		CRH
KIT		ACSL1
PLPP2		THRSP
AKR1C2		APOL5
ECI2		STRA6
TNFRSF21		GLTP
SMPD1		CAV1
KDSR		PLA2G10
SNAI2		PLA2G3
PTPN11		APOB
DGKQ		PLA2G2F
AKR1B1		PLA2G12A
PTPN13		OSBPL6
ECHS1		OSBPL7
MBOAT7		OSBPL8
PRDX6		ABCA2
ABCG1		ESYT2
CISH		RXRA
HSD17B7		NR1H4
NUDT19		NR1H3
BAAT		MIF
INPP4B		VLDLR
PIP5K1B		CHKA
APOA1		RBP4
PLA2G6		APOH
QKI		PLSCR1
ESYT1		ACACA
SMARCD3		NPC1
SMG1		APOC3
ACOXL		APOC2
TRERF1		APOC1
PDSS1		APOA2
SYNJ2		APOE
PER2		PLA2G4F
SPTLC3		OSBPL9
HMGCS1		NFKB1
AKR1C8P		CEL
AGPAT5		GPS2
BMX		SPNS2
GLYATL2		CPT1B
CPS1		LEP
PRKAR2B		APOF
ADGRF5		ABCA4
A0A0G2JRU3		FABP6
MOGAT2		CYP4F2
TNF		PLA2G2A
WASHC1		PITPNM2
FAM57B		MTTP
HTR2B		LRP10
A3GALT2		IL1B
HADHB		NPC2
PRKD1		APOC4
CRTC3		SLC27A2
PDK3		FABP4
PDK2		CPT1A
PDK1		OC90
PAFAH1B3		DRD3
DPM2		SREBF2
GLIPR1		MFSD2A
CYP4F12		CYP4A11
ALG3		PLA2G12B
OPN1MW		APOD
OPN1LW		PLA2G2D
MECR		ESYT3
CYP2G1P		SLC27A4
BDH2		SOAT1
ABHD6		APOL1
SMPD4		PLA2G1B
CRKL		ANXA1
CRK		LRP1
SMPDL3B		CEACAM1
PLEKHA3		STARD7
HMGCLL1		CLU
PLEKHA2		LAMTOR1
NAA40		SLC25A17
ELOVL3		OSBPL2
CYP2U1		PLA2G2C
GPIHBP1		SERAC1
PLD3		MID1IP1
ABHD4		SOAT2
NAPEPLD		PNPLA8
PLPPR5		PLEKHA8
LDLRAP1		STAR
CES5A		GAL
ACOT8		TTPA
PLAAT4		FABP2
OSBPL10		PCTP
FABP7		APOL2
ACAT1		PLA2G5
ST8SIA4		ACSL4
SOCS1		IRS2
ARV1		GM2A
PI4KB		APOL4
ALDH8A1		AGTR1
B3GALNT1		TNFAIP8L3
CAPN2		OSBPL3
UGT1A1		FABP3
SCP2		PPARD
URS000075B66E_9606		ERFE
LPCAT1		PLA2G2E
STARD3		LPA
DAGLA		SGPP1
MBTPS2		ABCB4
UGT2B11		AKT2
GK		LIPC
CYP46A1		ACACB
CHKB		PITPNA
PIGY		APOA4
LIPT1		PLTP
CES4A		NR1H2
MTMR6		CES1
MTMR7		NUS1
AVPR1A		STARD4
PIGA		COL4A3BP
LYPLA2		SPP1
ADORA1		PLA2G4A
FDFT1		ACSL3
TSPO		PON1
RAB38		FABP1
ABCD2		OSBP
SCCPDH		BMP6
ABCB11		NPC1L1
PPARG		LIMA1
ARF1		LCAT
EPHA8		PPARA
CROT		CFTR
CYP3A7-CYP3A51P		SLC27A3
HSD17B11		PTPN11
SQLE		ABCG1
PCSK9		APOA1
EDN1		PLA2G6
RDH13		ESYT1
ALOX5AP		PLEKHA3
LIPJ		LDLRAP1
FAM135B		OSBPL10
SUMF1		ARV1
ERG28		SCP2
SUMF2		STARD3
GOLM1		TSPO
ACSL6		ABCB11
ACAD8		PPARG
VAV3		CROT
CYP11B1		PCSK9
A0A0G2JPK8		EDN1
CES1P1		UGCG
ZFP69		PLSCR2
UGCG		PLSCR3
		BDKRB2
		SLC51A
		FZD4
		MAP2K6
		GRAMD1A
		ATP11B
		ANO9
		ABCA11P
		TRIAP1
		ABCG4
		LCN12
		GOT2
		ATP8A1
		RFT1
		NFKBIA
		TAC1
		SLC10A4
		ATP9B
		TMEM256-PLSCR3
		VPS4B
		anxa2-pcsk9_human
		GHRL
		POMC
		OXT
		EGF
		ATP8B4
		GRAMD1C
		XKR4
		ANO7
		ABCA3
		SIGMAR1
		SLCO2B1
		ABCC2
		ABCA8
		P2RX4
		SLCO3A1
		SFTPA1
		LCN1
		GRAMD1B
		RPS6KB1
		OSBPL11
		SLC5A8
		INHBA
		STOML1
		C2CD2L
		AGTR2
		PRELID2
		SLCO1C1
		LBP
		PQLC1
		ABCB1
		DRD4
		VPS4A
		HNRNPK
		SLCO2A1
		ABCA5
		ABCA7
		K7EP34
		SSTR4
		MSR1
		ABCA6
		APOL6
		CRHR1
		PLSCR5
		ABCA12
		ABCA9
		PRKN
		ATP5PF
		ANO3
		NMUR2
		SLC10A7
		ATP8B2
		SLC4A1
		PLA2R1
		SPX
		RELCH
		SLC22A9
		SLCO1A2
		CFHR4
		C1QTNF1
		ABCC1
		NME4
		UCN
		STX12
		PTCH1
		STARD5
		ATP8A2
		OSBP2
		ABCC3
		ABCC4
		SLCO1B3
		SERPINA5
		GALR1
		XKR8
		ITGB3
		SCARB2
		TNFSF11
		ATP10B
		ABCA13
		NMB
		PLSCR4
		EPRS
		GDF9
		ATP10A
		APOLD1
		SPNS3
		TMEM30CP
		ABCG5
		ABCG8
		ANXA2
		CRY1
		SYT7
		ATP9A
		ANO4
		AQP9
		LOC400499
		ATP11C
		REN
		XKR6
		XKR7
		XKR9
		APOL3
		THBS1
		ATP8B3
		ATP10D
		MFSD2B
		TMEM30B
		ABCA10
		SELENOM
		ATP11A
		SLC25A20
		NKX3-1
		ITGAV
		A0A0A6YYJ9
		SLCO1B7
		ANO6
		SLC10A6
		NTSR1
		SLC10A1
		KDM5B
		GLTPD2
		PDZD8
		SLCO1B1
		TNFRSF11A
		MYB
		STARD6
		U3KQG8
		U3KQE9
		TMF1
		NOS2
		DRD2
		PRELID3B
		LRP6
		VPS51
		PRELID3A
		SLC10A2
		ANXA2P2
		TMEM30A
		ACE
		SYK
		VAMP7
		RETN
		APOO
		SLC51B
		KCNN4
		PITPNC1
		PRELID1
		GULP1
		PLEKHA8P1
		SPNS1
