# Supplementary material for: A Transcriptomic Meta-Analysis Shows Lipid Metabolism Dysregulation as an Early Pathological Mechanism in the Spinal Cord of SOD1 Mice
Source: Int J Mol Sci. 2021 Sep 2;22(17):9553. doi: 10.3390/ijms22179553 (PMC8431303; doi:10.3390/ijms22179553)
Supplement: Supplementary file 1 [file ijms-22-09553-s001.zip › Supplementary Files/Table S3 List of genes found in the Early-MA and Late-Ma .xlsx]

## Sheet: Early-MA
Table S3. List of genes found in the Early symptomatic and Late symptomatic meta-analysis.
1110008P14Rik
1700003M07Rik
1700017B05Rik
1700040D17Rik
1810037I17Rik
2610507I01Rik
2810001G20Rik
4933431E20Rik
5430427O19Rik
6330403K07Rik
9930104L06Rik
9930111J21Rik1
A230070E04Rik
A2m
A330049N07Rik
A730020M07Rik
Aars
AB124611
Abca1
Abca9
Abcb1b
Abcc3
Abcd3
Abhd14b
Abhd17a
Abhd4
Abi3
Acat2
Ache
Acly
Acot11
Acot7
Acss2
Adam19
Adam23
Adamts2
Adamts5
Adamtsl3
Adap2
Adcy7
Add3
Adgre1
Adgrg6
Adm2
Adora3
Afap1l2
Aff1
Agt
Ahi1
Ahnak
Aif1
Ajuba
Akap6
Akna
Akr1b8
Alad
Aldh1a7
Aldh1l1
Aldh1l2
Aldh9a1
Alg14
Alox5ap
Alox8
Alpk1
Als2cl
Amotl1
Ampd3
Amz1
Ang
Angpt1
Angptl4
Ankrd13a
Ankrd35
Ankrd55
Ankrd6
Ano4
Ano6
Anxa2
Anxa3
Anxa5
Anxa6
Apba2
Apbb1
Apbb1ip
Apcdd1
Apln
Apobec1
Apobec3
Apobr
Apoc1
Apoe
Apol9a
Apol9b
Aqp4
Aqp6
Ar
Arc
Arhgap22
Arhgap25
Arhgap29
Arhgap30
Arhgap31
Arhgap36
Arhgap45
Arhgdib
Arhgdig
Arhgef19
Arhgef26
Arhgef4
Arl11
Arl16
Arpc1b
Arsb
Art3
Asah1
Asb16
Asic1
Aspg
Asph
Atf3
Atp10b
Atp1a1
Atp2b2
Atp8a2
Axl
B2m
B4galt1
Baiap3
Baz1a
Bcan
Bcar3
Bcl2a1b
Bcl2a1d
Bcl2l1
Bcl3
Bgn
Bhlhe40
Bin2
Blnk
Bmf
Bmp1
Bmp2k
Bmp6
Bmpr1b
Bpifc
Brsk1
Bst2
Btbd17
Btk
Bub1b
C1qa
C1qb
C1qc
C1ra
C2
C3
C3ar1
C4b
C5ar1
Cabp1
Cacna2d3
Cacnb3
Cacng2
Cadm3
Calb2
Calca
Calcb
Caln1
Camk1d
Camk2d
Camkk1
Capg
Capn2
Capn3
Car14
Car4
Car5b
Carmil2
Casp1
Casp12
Casp4
Casp8
Cavin1
Cbs
Ccdc124
Ccdc162
Ccdc190
Ccdc3
Ccdc50
Ccdc71l
Ccdc85c
Ccdc88b
Ccdc88c
Ccdc92
Ccl12
Ccl2
Ccl3
Ccl4
Ccl5
Ccl6
Ccl7
Ccl9
Ccn1
Ccn5
Ccnb1
Ccnb2
Ccnd1
Ccnd2
Ccng1
Ccr1
Ccr5
Cd109
Cd14
Cd151
Cd180
Cd22
Cd274
Cd300a
Cd300c2
Cd300lb
Cd300lf
Cd33
Cd34
Cd37
Cd38
Cd44
Cd48
Cd52
Cd53
Cd63
Cd68
Cd72
Cd74
Cd81
Cd84
Cd86
Cd9
Cdc42se1
Cdh19
Cdh22
Cdh6
Cdk1
Cdk6
Cdkl2
Cdr2
Cdsn
Cebpa
Cebpb
Cebpd
Celf6
Cend1
Cenpf
Cfh
Cflar
Cgnl1
Ch25h
Chac1
Chat
Chdh
Chga
Chil1
Chl1
Chodl
Chrm2
Chst11
Cited2
Ckb
Ckmt1
Clcf1
Cldn10
Cldn11
Clec4a3
Clec5a
Clec7a
Clic1
Cltb
Clu
Clvs1
Cmklr1
Cmpk2
Cmtm3
Cmtm6
Cmtm7
Cnn3
Cnr2
Cntfr
Cntn4
Col12a1
Col16a1
Col27a1
Col4a6
Col5a3
Colec10
Colec12
Coro1a
Cotl1
Cox7c
Cp
Cpe
Cplx1
Cpne3
Cpne6
Cpox
Cpxm2
Creb5
Creg1
Crem
Crip2
Crispld2
Crlf1
Crtac1
Crym
Csf1
Csf1r
Csf2rb
Csf2rb2
Csf3r
Cst3
Cst7
Ctdsp2
Ctla2b
Ctnnb1
Ctnnbip1
Ctsa
Ctsb
Ctsc
Ctsd
Ctse
Ctsh
Ctsl
Ctso
Ctss
Ctsz
Cttnbp2nl
Ctxn1
Cx3cr1
Cxcl10
Cxcl13
Cxcl16
Cyba
Cybb
Cyp1b1
Cyp27a1
Cyp39a1
Cyp4v3
Cyth4
D17H6S56E-5
D430019H16Rik
D430041D05Rik
Dab2
Dag1
Ddah1
Ddit3
Ddr2
Ddx58
Ddx60
Dexi
Dffa
Dhcr24
Dhcr7
Dhrs1
Dhrs3
Dhx58
Diras2
Dlk2
Dmtn
Dna2
Dnah1
Dnajc21
Dnase2a
Dnm3
Dnttip2
Doc2a
Dock2
Dock5
Dock7
Dock8
Dock9
Dok1
Dpcd
Dpy19l1
Dpyd
Dst
Dtna
Dtx3l
Dusp15
Dusp27
Dusp6
Dync1i1
Dynll2
Dzip1
Ecel1
Ecm1
Ecm2
Edem1
Ednrb
Eef1a1
Efemp2
Efhd2
Efna3
Efnb3
Egfl6
Egfr
Egr1
Egr2
Ehd2
Eif2ak2
Eif4ebp1
Elf4
Elk3
Elmsan1
Eme2
Eml1
Emp1
Emp2
Emp3
Endou
Eno2
Enpp1
Entpd1
Entpd2
Entpd3
Entpd5
Epb41l2
Epb41l3
Epsti1
Erap1
Erbin
Erlin2
Errfi1
Esyt1
Etnppl
Extl1
Extl3
Ezr
F11r
F3
F830016B08Rik
F9
Fabp7
Faim2
Fam102b
Fam111a
Fam129a
Fam129b
Fam131c
Fam135b
Fam167a
Fam227b
Fam57b
Farp1
Fas
Fblim1
Fbln1
Fbln2
Fbxo2
Fbxo31
Fcer1g
Fcgr1
Fcgr2b
Fcgr3
Fcgr4
Fcrls
Fdps
Fermt3
Fes
Fgd2
Fgf1
Fgf11
Fgf18
Fgf2
Fgf21
Fgf9
Fgfr2
Fgfr3
Fgfr4
Fgl2
Fgr
Fkbp1b
Fkbp9
Flna
Flnc
Flrt2
Fmnl3
Fmo1
Fmod
Fn1
Fn3k
Fnbp1
Fnbp1l
Fndc3b
Fndc4
Fndc5
Fnip2
Folh1
Fos
Fosl1
Fosl2
Frmd4a
Frmpd3
Ftl1
Fxyd1
Fxyd5
Fxyd6
Fxyd7
Fyb
Fzd1
Gabra2
Gabrq
Gadd45a
Gadd45g
Gadl1
Gal3st4
Galnt15
Galnt4
Galnt7
Galnt9
Gbp10
Gbp2
Gbp3
Gbp5
Gbp6
Gbp7
Gbp9
Gch1
Gclm
Gcnt1
Gcnt2
Gdf15
Gfap
Gfm2
Gfpt2
Gfra1
Ggt5
Ggt7
Ggta1
Gja1
Gjb6
Gjc2
Gjc3
Glb1
Glipr1
Glipr2
Glis3
Glra1
Gls2
Glyat
Gm15663
Gm16596
Gm1966
Gm45916
Gm4841
Gm4951
Gm8909
Gmip
Gna13
Gna14
Gna15
Gnai2
Gnb4
Gne
Gng11
Gng8
Gngt2
Gns
Golm1
Gpam
Gpc1
Gpnmb
Gpr137
Gpr146
Gpr17
Gpr176
Gpr179
Gpr183
Gpr34
Gpr35
Gpr37
Gpr65
Gpr84
Gprasp2
Gpsm3
Gria4
Grid2ip
Grin3b
Grn
Grrp1
Gsap
Gsdmd
Gstm7
Gucy1a2
Guk1
Gusb
H1f2
H2-D1
H2-DMa
H2-DMb1
H2-K1
H2-Oa
H2-Q1
H2-Q4
H2-T-ps
H2-T23
H2-T24
Habp4
Hacd2
Hacd4
Hap1
Hapln2
Havcr2
Hbegf
Hcar2
Hck
Hcls1
Hcn2
Hdac11
Hebp2
Hecw1
Hecw2
Herc6
Hexa
Hexb
Heyl
Hgf
Hif1a
Hipk1
Hk2
Hk3
Hmgn1
Hmox1
Hnrnph3
Hoxd8
Hpcal1
Hpcal4
Hpgd
Hpgds
Hr
Hspa12a
Hspa2
Hspb1
Hspb6
Hspb8
Htr7
Htra1
Htra3
Hvcn1
Icam1
Icosl
Id1
Idh2
Ifi204
Ifi207
Ifi209
Ifi27
Ifi27l2a
Ifi30
Ifi44
Ifi47
Ifih1
Ifit1
Ifit2
Ifit3
Ifit3b
Ifitm10
Ifitm3
Ifnar2
Ifngr1
Igf2r
Igfbp3
Igfbp5
Igfbpl1
Igsf10
Igsf21
Igsf6
Igtp
Iigp1
Ikzf1
Il10ra
Il10rb
Il13ra1
Il17ra
Il1a
Il1b
Il1r1
Il1rl2
Il1rn
Il21r
Il2rg
Il4ra
Il6ra
Il6st
Ildr2
Impdh1
Inka2
Inpp5d
Inppl1
Insig1
Ip6k3
Ipo8
Iqgap1
Iqgap2
Iqgap3
Irf1
Irf5
Irf7
Irf8
Irf9
Irgm1
Irgm2
Isg15
Itga5
Itga6
Itga7
Itgam
Itgav
Itgax
Itgb1
Itgb2
Itgb5
Itgb8
Itih2
Itih3
Itih5
Itpk1
Itpkb
Itpr2
Itprid2
Itprip
Itpripl1
Itpripl2
Jade2
Jak1
Junb
Kank2
Kcna1
Kcnab1
Kcnab2
Kcnc3
Kcnc4
Kcne1l
Kcng4
Kcnj14
Kcnj2
Kcnk3
Kcnk6
Kcnk9
Kcns1
Kcns3
Kctd12
Kctd17
Kif2c
Kif3a
Kif5b
Kif5c
Kirrel2
Klc1
Klc2
Klf13
Klf15
Klf6
Klhdc8b
Klhl24
Klhl4
Klhl6
Klk8
Klrb1b
Knl1
Lag3
Lair1
Lamb2
Lamc1
Lamp2
Laptm4a
Laptm5
Lat2
Lats2
Lcat
Lcp1
Lcp2
Lgals3
Lgals3bp
Lgals9
Lgi1
Lgi4
Lgmn
Lgr6
Lhfp
Lhx4
Lilr4b
Lilrb4a
Limd2
Lin7b
Lingo4
Lix1
Lix1l
Lnpep
Lnx1
LOC115487184
Lonrf3
Lox
Loxl2
Lpar5
Lpcat1
Lpcat3
Lpcat4
Lpl
Lpxn
Lrig1
Lrmp
Lrp1
Lrp5
Lrrc3
Lrrc49
Lrrc75b
Lrrc8a
Lrrk1
Lrsam1
Lsm11
Lsp1
Ltbr
Luzp2
Lxn
Ly6e
Ly86
Ly9
Lyn
Lyz2
Mafb
Maff
Mafk
Man1a
Man2a1
Man2b1
Man2b2
Map1b
Map3k6
Map6d1
Mapk4
Mapk8ip1
Mapk8ip2
Mapkapk2
Marcks
Masp1
Mat2a
Mcam
Mcl1
Mcm3
Mcm5
Mdfic
Mef2c
Mertk
Mest
Met
Mettl14
Mfhas1
Mfsd12
Mfsd2a
Mgst3
Mical1
Micos10
Milr1
Mki67
Mlc1
Mllt11
Mlxipl
Mmp12
Mmp15
Mmp19
Mmp9
Mnx1
Mob1a
Mpeg1
Mrc1
Mrc2
Mrgprf
Mrps6
Mrvi1
Ms4a4c
Ms4a6b
Ms4a6c
Ms4a6d
Ms4a7
Msn
Msr1
Mt1
Mt2
Mthfsd
Mtmr11
Mtpn
Mustn1
Mvp
Mx1
Mx2
Mxra8
Myc
Myd88
Myh11
Myh14
Myh9
Myl12b
Mylk
Myo1c
Myo1d
Myo1f
Myof
Myom1
Mypop
Mzt1
Naalad2
Nab2
Nacad
Naga
Naglu
Naip2
Naip5
Naprt
Nat8
Nat8l
Nbl1
Ncan
Ncf1
Ncf2
Ncf4
Nckap1l
Ncoa7
Ncs1
Ndn
Ndrg2
Ndst1
Ndst3
Ndst4
Ndufa4
Ndufb3
Ndufb6
Ndufb8
Necab3
Necap2
Nectin2
Nefh
Nefl
Nefm
Nek6
Nell1
Nes
Neto2
Neurl3
Nexn
Nfam1
Nfatc1
Nfe2l2
Nfic
Nfkb2
Nfya
Ngb
Nhsl1
Nid2
Nipal4
Nkd1
Nkiras1
Nln
Nlrc5
Nlrp3
Nnat
Notch2
Notch3
Npb
Npl
Npnt
Nrcam
Nrg1
Nrp1
Nrros
Nsdhl
Nupr1
Nxn
Nxph4
Oas1a
Oas1b
Oas2
Oas3
Oasl1
Oasl2
Oat
Odc1
Olfml3
Olfr287
Olig1
Olr1
Omg
Oplah
Ormdl3
Osbpl7
Osmr
Otud1
Otulinl
P2rx6
P2ry6
P4ha3
P4htm
Pabpc1
Pacsin3
Pag1
Pald1
Palld
Palm3
Pank1
Pappa
Paqr8
Paqr9
Parp10
Parp12
Parp14
Parp3
Parp9
Parvg
Patj
Pbk
Pbxip1
Pcdh11x
Pcdhga10
Pcdhgc3
Pcdhgc5
Pclaf
Pcp4
Pcp4l1
Pcyt1b
Pdcd1
Pde3b
Pde5a
Pdgfd
Pdlim4
Pdlim5
Pdpn
Peli3
Per1
Pgghg
Pgm5
Pgr
Phactr1
Phf11b
Phf11d
Phkb
Phyhd1
Piezo1
Piezo2
Piga
Pigz
Pik3ap1
Pik3cg
Pimreg
Pink1
Pkd1l2
Pkd2l1
Pkn1
Pla2g15
Plat
Plau
Plaur
Plcb2
Plcb3
Plce1
Plcg2
Pld2
Pld4
Plek
Plekha1
Plekha4
Plekhd1
Plekhf2
Plekhh1
Plekhm2
Plekho1
Plin2
Plin3
Plscr2
Plxdc1
Plxnb1
Plxnb2
Plxnd1
Pml
Pnpla2
Pnpla3
Pnpla7
Podxl2
Polr3g
Pon3
Postn
Ppa2
Ppip5k2
Ppl
Ppm1e
Ppp1r14b
Ppp1r18
Ppp1r1b
Ppp1r3c
Ppp2r2b
Prc1
Prdx6
Prelp
Prima1
Prkaca
Prkcd
Prkcz
Pros1
Prrx2
Prss12
Prss23
Prune2
Psap
Psmb8
Psmb9
Psme1
Ptafr
Ptbp1
Ptbp2
Ptbp3
Ptgfrn
Ptgs1
Ptk2b
Ptpn18
Ptpn5
Ptpn6
Ptpn7
Ptprc
Ptprz1
Pttg1ip
Ptx3
Pum2
Pvr
Pycard
Rab29
Rab32
Rab37
Rab3a
Rab3b
Rab3il1
Rac2
Rac3
Rack1
Ralgds
Rap1b
Rap2b
Rapgef3
Rasa4
Rasal2
Rasal3
Rasl11a
Rb1
Rbm47
Rbp1
Rcor2
Rcsd1
Reep2
Renbp
Ret
Rflna
Rftn2
Rgma
Rgs1
Rgs20
Rgs7bp
Rhbdf1
Rhbdf2
Rhoc
Rhoh
Rhoj
Rhou
Rhpn2
Rian
Rimkla
Rims1
Rin2
Rin3
Ripk1
Rmc1
Rnase4
Rnd2
Rnf112
Rnf213
Rnft1
Robo4
Rpl21
Rps4l
Rps6ka3
Rras
Rsad2
Rspo2
Rtl8c
Rtp4
Runx1
Rwdd3
Ryk
S100a10
S100a11
S100a4
S100a6
S1pr3
S1pr5
Sacs
Samd9l
Samsn1
Sash3
Sat1
Sbno2
Scg3
Scimp
Scrg1
Sdc3
Sdc4
Sec24d
Sel1l3
Selplg
Septin11
Serinc2
Serinc3
Serpina3c
Serpina3f
Serpina3m
Serpinb1a
Serpinb5
Serpinb8
Serpine1
Serpinf2
Serping1
Sft2d2
Sgpl1
Sh2d4a
Sh3bgr
Sh3bp2
Sh3glb2
Shisa4
Shisa5
Shisal1
Siglec1
Siglecf
Siglech
Sipa1
Sirpa
Skap2
Sla
Slamf8
Slamf9
Slc10a4
Slc11a1
Slc12a4
Slc14a1
Slc15a3
Slc16a2
Slc16a3
Slc16a6
Slc18a3
Slc1a3
Slc1a4
Slc22a4
Slc23a2
Slc24a4
Slc25a27
Slc25a29
Slc29a4
Slc2a4
Slc34a3
Slc35d3
Slc35f3
Slc37a2
Slc39a1
Slc39a14
Slc41a1
Slc43a3
Slc44a2
Slc45a4
Slc5a3
Slc6a5
Slc7a1
Slc7a10
Slc7a14
Slc7a2
Slc7a5
Slc7a7
Slc7a8
Slc9a1
Slc9b2
Slco2b1
Slco4a1
Slfn2
Slfn5
Slfn8
Slfn9
Slit2
Slitrk6
Smco3
Smim10l2a
Smim17
Smo
Smox
Snf8
Snhg8
Soat1
Socs3
Sod1
Sorbs1
Sorcs2
Sowahc
Sox2ot
Sp100
Sp110
Sp140
Sp7
Sparc
Spi1
Spint1
Spire1
Spon1
Spp1
Sppl2b
Sprr1a
Sqle
Srgap1
Srgn
Ssc5d
Sspo
St14
St3gal5
St8sia6
Stab1
Stard4
Stat1
Stat2
Stat3
Stat6
Stbd1
Steap3
Sting1
Stk32a
Stk39
Stk40
Stmn2
Stmn3
Ston1
Stra6l
Suclg2
Sulf1
Sult4a1
Sun2
Susd2
Susd6
Sv2c
Syde1
Syk
Syn2
Syndig1l
Synpo
Synpo2
Syt2
Syt3
Szrd1
Tab2
Tacr1
Tagap
Tagln
Tagln2
Tap1
Tapbp
Tbxas1
Tcim
Tcirg1
Tcn2
Tead1
Tec
Tecr
Tent5c
Tes
Tesc
Tfrc
Tgfb1
Tgfbr1
Tgfbr2
Tgif1
Tgm1
Tgm2
Thbs2
Them6
Themis2
Thsd7a
Ticam2
Tifa
Tifab
Timeless
Timm8b
Timp1
Timp4
Tjap1
Tjp1
Tlcd4
Tle3
Tln1
Tlr1
Tlr13
Tlr2
Tlr3
Tlr4
Tlr7
Tlr9
Tm4sf1
Tm7sf2
Tmc7
Tmem106a
Tmem119
Tmem176a
Tmem176b
Tmem229b
Tmem25
Tmem250-ps
Tmem273
Tmem37
Tmem47
Tmem63a
Tmem63c
Tmem91
Tmprss5
Tmsb10
Tmsb4x
Tnfaip8l2
Tnfrsf11b
Tnfrsf12a
Tnfrsf1a
Tnfrsf1b
Tnfsf8
Tns3
Tns4
Top2a
Tor3a
Tor4a
Tpd52l1
Tpm4
Tpp1
Tpx2
Trafd1
Tram1l1
Trem2
Treml2
Trib1
Trib3
Trim12c
Trim14
Trim16
Trim21
Trim25
Trim30a
Trim30d
Trim47
Trim56
Tsc22d4
Tspan14
Tspan4
Tspan6
Tspo
Ttbk2
Ttc39a
Ttc39b
Ttyh1
Tubb3
Tubb4b
Tubb6
Twsg1
Txnip
Tyrobp
Uba7
Ube2o
Uchl1
Ucn
Ucp2
Ugt8a
Unc5b
Unc93b1
Uqcr11
Uqcrq
Usp18
Usp53
Vamp1
Vamp8
Vat1l
Vav1
Vcam1
Vcl
Vcp
Vdr
Vegfa
Vgf
Vim
Vipr2
Vsir
Vsx2
Vwa1
Vwa5a
Vwa5b1
Vwa7
Was
Wasf2
Wbp1l
Wdfy4
Wfs1
Wnt7b
Wsb1
Wwtr1
Xaf1
Xpo1
Yap1
Ywhag
Zbp1
Zc3h12c
Zc3hav1
Zcchc12
Zfas1
Zfp185
Zfp36
Zfp36l1
Zfp36l2
Zfp612
Znfx1
Zyx

## Sheet: Late-MA
Table S3. List of genes found in the Early-symptomatic and Late-symptomatic meta-analysis.
0610010F05Rik
0610030E20Rik
0610040J01Rik
1110004F10Rik
1110008P14Rik
1110032F04Rik
1110038B12Rik
1110051M20Rik
1110059G10Rik
1300002E11Rik
1500004A13Rik
1500009C09Rik
1500011B03Rik
1600012H06Rik
1700001K19Rik
1700003E16Rik
1700003M07Rik
1700007F19Rik
1700017B05Rik
1700019D03Rik
1700025G04Rik
1700029J07Rik
1700030J22Rik
1700037H04Rik
1700040D17Rik
1700063D05Rik
1700066M21Rik
1810030O07Rik
1810037I17Rik
1810058I24Rik
2010300C02Rik
2210016L21Rik
2310002F09Rik
2310022B05Rik
2310057M21Rik
2310061I04Rik
2410004B18Rik
2410004P03Rik
2410006H16Rik
2410018L13Rik
2510009E07Rik
2510039O18Rik
2610001J05Rik
2610002M06Rik
2610203C22Rik
2700081O15Rik
2810032G03Rik
2810049E08Rik
2810429I04Rik
2810459M11Rik
2900052N01Rik
2900097C17Rik
3110082I17Rik
3830403N18Rik
3930402G23Rik
4632428C04Rik
4831407H17Rik
4833411C07Rik
4833420G17Rik
4833438C02Rik
4930429B21Rik
4930447K03Rik
4930447M23Rik
4930452B06Rik
4930452G13Rik
4930486L24Rik
4930503L19Rik
4930506C21Rik
4930523C07Rik
4930556M19Rik
4930578M01Rik
4931406C07Rik
4931428F04Rik
4932438A13Rik
4932438H23Rik
4933431E20Rik
5330417C22Rik
5330434G04Rik
5430427O19Rik
5730409E04Rik
5830432E09Rik
5930403L14Rik
6330403K07Rik
6330409D20Rik
6430548M08Rik
6430571L13Rik
8030462N17Rik
9130023H24Rik
9330102E08Rik
9330104G04Rik
9330117O12Rik
9330158H04Rik
9330175E14Rik
9330182L06Rik
9330188P03Rik
9430021M05Rik
9430037G07Rik
9530053A07Rik
9530068E07Rik
9630013A20Rik
9930111J21Rik1
A130077B15Rik
A230001M10Rik
A230009B12Rik
A230056P14Rik
A230070E04Rik
A2m
A2ml1
A330015K06Rik
A330023F24Rik
A330048O09Rik
A330074K22Rik
A430093F15Rik
A530040E14Rik
A530058N18Rik
A630001G21Rik
A730020E08Rik
A730020M07Rik
A830010M20Rik
A830018L16Rik
A930006I01Rik
A930011G23Rik
A930017M01Rik
AA467197
AA986860
Aak1
Aard
Aars
Aars2
Aass
Aatk
AB124611
Abat
Abca1
Abca5
Abca6
Abca7
Abca9
Abcb10
Abcb1b
Abcb6
Abcb7
Abcb9
Abcc3
Abcc4
Abcc5
Abcc8
Abcd1
Abcd3
Abcf2
Abcf3
Abcg2
Abcg4
Abhd11os
Abhd14b
Abhd15
Abhd16a
Abhd17a
Abhd17c
Abhd2
Abhd4
Abhd6
Abhd8
Abi1
Abi2
Abi3
Abl1
Ablim1
Ablim2
Ablim3
Abr
Abtb2
Acaa1a
Acaa2
Acad10
Acad12
Acad8
Acad9
Acadl
Acadm
Acads
Acadsb
Acadvl
Acan
Acap1
Acat1
Acat2
Acat3
Accs
Ace
Acer3
Ache
Ackr1
Ackr3
Acly
Aco2
Acot1
Acot13
Acot2
Acot3
Acot7
Acox1
Acox3
Acp1
Acp2
Acp5
Acsbg1
Acsf2
Acsl1
Acsl6
Acss2
Acss3
Actb
Actl6b
Actn1
Actn4
Actr10
Actr1b
Actr3b
Actr8
Actrt3
Acvr1b
Acvr1c
Acyp1
Acyp2
Ada
Adam10
Adam11
Adam12
Adam15
Adam17
Adam19
Adam22
Adam23
Adam5
Adam8
Adam9
Adamts1
Adamts12
Adamts14
Adamts2
Adamts3
Adamts4
Adamts5
Adamts9
Adamtsl1
Adamtsl2
Adamtsl3
Adamtsl4
Adamtsl5
Adap1
Adap2
Adar
Adarb1
Adck2
Adcy1
Adcy2
Adcy3
Adcy5
Adcy7
Adcy8
Adcy9
Adcyap1
Add2
Add3
Adgb
Adgra1
Adgra3
Adgrb1
Adgrb2
Adgrb3
Adgre1
Adgre5
Adgrg3
Adgrg5
Adgrg6
Adgrl1
Adgrl2
Adgrl3
Adh1
Adh5
Adhfe1
Adipor1
Adk
Adm
Adm2
Ado
Adora2b
Adora3
Adra1a
Adra1b
Adra2a
Adra2c
Adrb1
Adrb2
Adss
Adssl1
Aebp1
AF357359
Afap1l2
Aff1
Aff2
Aff3
Afg3l1
Afg3l2
Afp
Aftph
Aga
Agap2
Agap3
Agbl2
Agbl3
Agbl4
Ager
Agk
Agl
Agmat
2001-08-01
2002-08-01
Agpat2
Agpat3
Agpat5
Agt
Agtpbp1
Agtr2
Agtrap
Ahcyl1
Ahi1
Ahnak
Ahsa1
AI427809
AI467606
AI506816
AI593442
AI597479
AI662270
AI837181
AI854703
Aif1
Aif1l
Aifm3
Aim2
Aip
Airn
Ajm1
Ajuba
Ak1
Ak2
Ak3
Ak5
Ak7
Akain1
Akap11
Akap12
Akap13
Akap6
Akap9
Akip1
Akirin1
Akna
Akr1b10
Akr1b8
Akr1c13
Akr1c14
Akr1e1
Akt1
Akt3
Aktip
Alad
Alas1
Alcam
Aldh16a1
Aldh1a1
Aldh1a7
Aldh1b1
Aldh1l1
Aldh1l2
Aldh3b1
Aldh4a1
Aldh5a1
Aldh6a1
Aldoa
Alg10b
Alg11
Alg2
Alg5
Alk
Alox5
Alox5ap
Alox8
Alpk1
Alpl
Als2cl
Alx4
Amdhd2
Amer1
Amer2
Amer3
Amfr
Amhr2
Amigo1
Ammecr1l
Amot
Amotl1
Ampd2
Ampd3
Amph
Amt
Amy1
Amz1
Amz2
Anapc15
Ang
Angel1
Angpt1
Angpt4
Angptl2
Angptl4
Angptl7
Ank1
Ank2
Ank3
Ankdd1b
Ankfy1
Ankle1
Ankle2
Ankmy2
Ankra2
Ankrd11
Ankrd13a
Ankrd13d
Ankrd16
Ankrd17
Ankrd23
Ankrd24
Ankrd26
Ankrd27
Ankrd28
Ankrd29
Ankrd34a
Ankrd34b
Ankrd34c
Ankrd35
Ankrd42
Ankrd44
Ankrd46
Ankrd49
Ankrd50
Ankrd52
Ankrd54
Ankrd55
Ankrd6
Ankrd9
Anks1b
Ankub1
Ano3
Ano4
Ano6
Ano8
Anp32a
Anp32b
Anp32e
Anpep
Antxr1
Antxr2
Anxa1
Anxa2
Anxa3
Anxa4
Anxa5
Anxa6
Anxa7
Aoah
Aox1
Ap1ar
Ap1b1
Ap1g1
Ap1g2
Ap1m1
Ap1s2
Ap2a1
Ap2b1
Ap2m1
Ap3b1
Ap3b2
Ap3d1
Ap3m2
Ap3s2
Ap4s1
Apaf1
Apba1
Apba2
Apbb1
Apbb1ip
Apbb3
Apc
Apc2
Apcdd1
Aph1a
Apln
Aplp1
Apobec1
Apobec3
Apobr
Apoc1
Apoc4
Apod
Apoe
Apol8
Apool
App
Appbp2
Appl1
Aprt
Aqp11
Aqp4
Aqp6
Aqp9
Ar
Araf
Arap1
Arap2
Arap3
Arc
Areg
Arel1
Arf3
Arf4
Arf6
Arfgap3
Arfgef1
Arfgef2
Arfgef3
Arfip1
Arfip2
Arglu1
Arhgap1
Arhgap11a
Arhgap17
Arhgap18
Arhgap19
Arhgap20
Arhgap23
Arhgap24
Arhgap25
Arhgap26
Arhgap30
Arhgap31
Arhgap32
Arhgap35
Arhgap36
Arhgap4
Arhgap44
Arhgap45
Arhgap9
Arhgdia
Arhgdib
Arhgdig
Arhgef10l
Arhgef11
Arhgef15
Arhgef17
Arhgef19
Arhgef2
Arhgef25
Arhgef26
Arhgef3
Arhgef37
Arhgef4
Arhgef40
Arhgef5
Arhgef9
Arid5a
Arl11
Arl13b
Arl16
Arl2bp
Arl3
Arl4c
Arl5b
Arl5c
Arl6ip6
Armc1
Armc10
Armc2
Armc3
Armc5
Armc6
Armc9
Armcx1
Armcx2
Armcx3
Armcx4
Armh2
Armh4
Arnt
Arpc1b
Arpc2
Arpc4
Arpc5
Arpp21
Arrb2
Arrdc1
Arrdc4
Arsa
Arsb
Arsg
Arsk
Arvcf
As3mt
Asah1
Asah2
Asap1
Asap3
Asb1
Asb10
Asb13
Asb16
Ascc2
Ash1l
Asic1
Asic2
Asna1
Asns
Asnsd1
Aspa
Aspg
Asphd1
Asphd2
Aspm
Astn1
Asxl3
Atad5
Atcay
Ate1
Atf1
Atf2
Atf3
Atf5
Atg13
Atg2a
Atg2b
Atg4a
Atg4b
Atg4c
Atg4d
Atg9a
Atg9b
Atl1
Atl2
Atl3
Atmin
Atn1
Atoh8
Atp10b
Atp11c
Atp13a2
Atp13a3
Atp13a4
Atp1a1
Atp1a3
Atp1b1
Atp1b2
Atp1b3
Atp23
Atp2a2
Atp2b1
Atp2b2
Atp2b3
Atp5a1
Atp5b
Atp5d
Atp5g1
Atp5g3
Atp5h
Atp5j2
Atp5k
Atp5l
Atp5md
Atp5mpl
Atp5o
Atp5pb
Atp6ap2
Atp6v0a1
Atp6v0a2
Atp6v0d1
Atp6v0d2
Atp6v0e
Atp6v0e2
Atp6v1a
Atp6v1b2
Atp6v1c1
Atp6v1d
Atp6v1e1
Atp6v1g1
Atp6v1g2
Atp7a
Atp7b
Atp8a1
Atp8a2
Atp8b2
Atp8b3
Atp8b4
Atp8b5
Atp9a
Atpaf1
Atpif1
Atraid
Atrn
Atrnl1
Atxn1
Atxn10
Atxn2
Atxn7l3
Atxn7l3b
AU022793
Auh
Aup1
Aurkb
Auts2
Aven
Avil
Avl9
Avpi1
AW112010
AW549877
AW551984
Axl
Azi2
Azin1
B230209E15Rik
B230217C12Rik
B230217O12Rik
B230312C02Rik
B2m
B3galt1
B3galt2
B3galt5
B3gat1
B3gat3
B3gnt5
B3gnt7
B3gnt8
B3gntl1
B430306N03Rik
B4galnt4
B4galt1
B4galt4
B4galt5
B4galt6
B4gat1
B630019K06Rik
Baalc
Babam1
Bace1
Bace2
Bach1
Bach2os
Bag2
Bag6
Bahcc1
Baiap2l2
Bak1
Bambi
Bap1
Barhl1
Basp1
Batf
Batf3
Bax
Baz1a
Bbc3
Bbs4
BC005537
BC005624
BC025920
BC030500
BC034090
BC035044
BC049352
BC064078
BC147527
Bcan
Bcar3
Bcas3
Bcat1
Bcat2
Bckdha
Bckdhb
Bcl10
Bcl11a
Bcl11b
Bcl2
Bcl2a1a
Bcl2a1b
Bcl2a1d
Bcl2l1
Bcl2l11
Bcl2l12
Bcl2l2
Bcl3
Bcl6b
Bcl7a
Bco2
Bdh1
Bdh2
Bean1
Begain
Bend6
Bend7
Bet1
Bex2
Bex3
Bgn
Bhlhb9
Bhlhe22
Bhlhe40
Bhlhe41
Bicc1
Bicd1
Bicdl1
Bicra
Bin1
Bin2
Bin3
Birc3
Birc5
Birc6
Bivm
Blnk
Bmerb1
Bmf
Bmi1
Bmp1
Bmp2
Bmp2k
Bmp4
Bmp6
Bmper
Bmpr1a
Bmpr1b
Bmpr2
Bmyc
Bnip2
Bnip3
Boc
Bod1l
Borcs5
Borcs6
Bpifc
Bpnt1
Bptf
Braf
Brat1
Brcc3
Brd2
Bri3
Bri3bp
Brinp1
Brinp2
Brip1
Brip1os
Brk1
Brms1l
Brsk1
Brsk2
Brwd1
Bscl2
Bsn
Bst2
Btbd10
Btbd11
Btbd16
Btbd17
Btbd2
Btbd3
Btbd6
Btd
Btg1
Btg2
Btk
Btrc
Bub1
Bub1b
C030034L19Rik
C130021I20Rik
C130046K22Rik
C130050O18Rik
C130074G19Rik
C1qa
C1qb
C1qc
C1qtnf1
C1qtnf3
C1qtnf4
C1qtnf6
C1ra
C1rl
C1s1
C1s2
C2
C2cd2l
C2cd5
C3
C330007P06Rik
C330018D20Rik
C330020E22Rik
C3ar1
C4a
C4b
C530005A16Rik
C530008M17Rik
C5ar1
C5ar2
C630043F03Rik
C7
C920009B18Rik
C9orf72
Cab39
Cables1
Cables2
Cabp1
Cabp7
Cacna1a
Cacna1b
Cacna1c
Cacna1e
Cacna1g
Cacna1i
Cacna1s
Cacna2d2
Cacna2d3
Cacnb1
Cacnb2
Cacnb4
Cacng2
Cacng5
Cacng7
Cacng8
Cacybp
Cadm3
Cadm4
Cadps
Cadps2
Calb2
Calca
Calcb
Calcrl
Cald1
Calhm2
Calhm6
Calm1
Calm2
Calm3
Calml4
Caln1
Calr
Calr4
Calu
Caly
Camk1
Camk1d
Camk1g
Camk2b
Camk2g
Camk2n1
Camk2n2
Camk4
Camkk1
Camkk2
Camkmt
Camkv
Camsap1
Camsap2
Camsap3
Camta1
Camta2
Cand1
Cand2
Cant1
Cap1
Cap2
Capg
Capn1
Capn10
Capn2
Capn3
Capns1
Caprin1
Caprin2
Capza2
Capzb
Car10
Car13
Car14
Car4
Car5b
Car7
Card10
Card11
Card19
Card6
Card9
Carhsp1
Carlr
Carmil2
Carmil3
Cask
Caskin1
Casp1
Casp12
Casp3
Casp4
Casp6
Casp7
Casp8
Cast
Castor1
Castor2
Catip
Cav1
Cav2
Cavin1
Cavin3
Cbarp
Cbfa2t2
Cbfb
Cbln1
Cbln2
Cbln4
Cbr1
Cbr2
Cbr3
Cbr4
Cbx4
Cbx6
Cbx7
Ccar2
Ccdc102a
Ccdc103
Ccdc106
Ccdc114
Ccdc122
Ccdc124
Ccdc126
Ccdc127
Ccdc134
Ccdc136
Ccdc141
Ccdc149
Ccdc158
Ccdc160
Ccdc162
Ccdc177
Ccdc184
Ccdc186
Ccdc187
Ccdc190
Ccdc25
Ccdc28a
Ccdc3
Ccdc32
Ccdc34
Ccdc50
Ccdc60
Ccdc62
Ccdc71l
Ccdc80
Ccdc85b
Ccdc85c
Ccdc86
Ccdc88b
Ccdc88c
Ccdc90b
Ccdc91
Ccdc92
Ccdc92b
Ccdc93
Ccdc9b
Cchcr1
Cck
Cckbr
Ccl11
Ccl12
Ccl2
Ccl3
Ccl4
Ccl5
Ccl6
Ccl7
Ccl8
Ccl9
Ccn1
Ccn3
Ccn5
Ccna2
Ccnb1
Ccnb2
Ccnd1
Ccnd2
Ccnd3
Ccne1
Ccng1
Ccnh
Ccnl1
Ccnl2
Ccny
Ccp110
Ccr1
Ccr5
Ccrl2
Ccser1
Ccser2
Cct7
Cct8
Cd101
Cd109
Cd14
Cd151
Cd163
Cd164
Cd164l2
Cd180
Cd200
Cd200r1
Cd200r4
Cd22
Cd244a
Cd24a
Cd274
Cd276
Cd28
Cd2ap
Cd300a
Cd300c2
Cd300lb
Cd300ld
Cd300ld3
Cd300lf
Cd302
Cd33
Cd34
Cd36
Cd37
Cd38
Cd4
Cd44
Cd47
Cd48
Cd5
Cd52
Cd53
Cd55
Cd5l
Cd63
Cd68
Cd69
Cd72
Cd74
Cd79b
Cd81
Cd82
Cd84
Cd86
Cd8a
Cd9
Cd99l2
Cdadc1
Cdc123
Cdc14a
Cdc20
Cdc40
Cdc42
Cdc42bpg
Cdc42se1
Cdc6
Cdca2
Cdca3
Cdca4
Cdca5
Cdca8
Cdh1
Cdh10
Cdh11
Cdh12
Cdh18
Cdh19
Cdh22
Cdh24
Cdh4
Cdh6
Cdh7
Cdh8
Cdh9
Cdhr5
Cdip1
Cdk1
Cdk10
Cdk14
Cdk16
Cdk18
Cdk2
Cdk2ap1
Cdk2ap2
Cdk4
Cdk5
Cdk5r1
Cdk5r2
Cdk5rap2
Cdk5rap3
Cdk6
Cdk7
Cdkl1
Cdkl2
Cdkl5
Cdkn1a
Cdkn1c
Cdkn2a
Cdkn2aipnl
Cdkn2c
Cdo1
Cdr1
Cdr1os
Cdr2
Cds1
Cds2
Cdsn
Cdt1
Cdyl
Cdyl2
Cebpa
Cebpb
Cebpd
Cebpg
Cebpz
Cela1
Celf1
Celf2
Celf4
Celsr2
Celsr3
Cend1
Cenpa
Cenpb
Cenpe
Cenpf
Cenpi
Cenpx
Cep112
Cep120
Cep126
Cep128
Cep170
Cep170b
Cep19
Cep192
Cep290
Cep350
Cep55
Cep83
Cep83os
Cep89
Cep97
Cers2
Cers5
Cetn2
Cetn3
Cetn4
Cfap126
Cfap43
Cfap44
Cfap46
Cfap97
Cfap99
Cfh
Cflar
Cgas
Cgn
Cgnl1
Ch25h
Chaf1b
Chat
Chchd10
Chchd6
Chd1
Chd3
Chd5
Chd6
Chd7
Chd8
Chdh
Chek2
Chga
Chgb
Chic1
Chic2
Chil1
Chil3
Chl1
Chml
Chmp1b
Chmp2a
Chmp5
Chn1
Chodl
Chordc1
Chp1
Chpf
Chpf2
Chpt1
Chrac1
Chrdl1
Chrm2
Chrm3
Chrna2
Chrna4
Chrna7
Chrnb2
Chst10
Chst11
Chst12
Chst14
Chst2
Chst8
Chsy1
Chsy3
Ciao1
Ciao2a
Cib1
Cib2
Cip2a
Cipc
Cisd1
Cit
Cited1
Ckap2
Ckap2l
Ckb
Ckmt1
Cks1b
Clasp1
Clasp2
Clba1
Clca3a1
Clcc1
Clcf1
Clcn4
Clcn5
Clcn6
Clcn7
Cldn1
Cldn10
Cldn11
Cldn19
Clec12a
Clec16a
Clec2d
Clec2l
Clec3b
Clec4a2
Clec4a3
Clec4d
Clec4e
Clec4n
Clec5a
Clec7a
Clgn
Clic1
Clic4
Clic5
Clip2
Clip4
Clk1
Clk4
Clmn
Clmp
Cln3
Cln5
Cln6
Cln8
Clptm1l
Clspn
Clstn1
Clstn2
Clstn3
Cltb
Cltc
Clu
Cluh
Clvs1
Clvs2
Cmas
Cmbl
Cmc2
Cmip
Cmklr1
Cmpk2
Cmtm3
Cmtm6
Cmtm7
Cmya5
Cndp2
Cnih4
Cnksr1
Cnksr2
Cnksr3
Cnn2
Cnn3
Cnnm1
Cnnm2
Cnot6
Cnppd1
Cnpy2
Cnpy4
Cnr1
Cnr2
Cnst
Cntfr
Cntn2
Cntn3
Cntn4
Cntn5
Cntn6
Cntnap1
Cntnap2
Cntnap4
Cntnap5a
Cntnap5b
Cntrl
Coa5
Coasy
Cobl
Cog5
Cog6
Col11a1
Col12a1
Col13a1
Col15a1
Col16a1
Col18a1
Col19a1
Col1a1
Col1a2
Col20a1
Col22a1
Col23a1
Col25a1
Col27a1
Col28a1
Col3a1
Col4a3bp
Col4a5
Col4a6
Col5a1
Col5a2
Col5a3
Col6a1
Col6a2
Col9a2
Col9a3
Colca2
Colec10
Colec12
Colgalt1
Commd6
Commd8
Comt
Copg1
Copg2
Coprs
Cops3
Cops4
Cops6
Cops7a
Cops7b
Cops8
Copz1
Copz2
Coq3
Coq8b
Coro1a
Coro1b
Coro1c
Coro2a
Coro2b
Coro6
Cotl1
Cox10
Cox11
Cox15
Cox4i1
Cox5a
Cox5b
Cox6a2
Cox6b1
Cox6b2
Cox6c
Cox7a1
Cox7a2
Cox7b
Cox7c
Cp
Cpe
Cpeb1
Cpeb3
Cplx1
Cplx2
Cpne1
Cpne2
Cpne3
Cpne4
Cpne6
Cpne8
Cpox
Cpped1
Cpq
Cpsf2
Cpt1a
Cpt2
Cptp
Cpxm1
Cpxm2
Cr1l
Crabp1
Cracr2a
Cracr2b
Crat
Crb2
Crbn
Creb3l1
Creb3l2
Creb3l4
Crebl2
Creg1
Creg2
Creld1
Creld2
Crem
Crh
Crhbp
Crhr1
Crim1
Crip1
Crip2
Crispld2
Crlf1
Crlf2
Crmp1
Crot
Crtac1
Crtap
Crtc1
Crtc2
Cryab
Cryba4
Cryl1
Crym
Cryz
Cryzl2
Cs
Csad
Csdc2
Csf1
Csf1r
Csf2ra
Csf2rb
Csf2rb2
Csf3r
Csgalnact1
Csgalnact2
Csmd1
Csmd2
Csmd3
Csn3
Csnk1g2
Cspg4
Csrnp1
Csrnp3
Cst3
Cst7
Cstb
Cstf2
Cstf2t
Ctbp1
Ctbs
Ctdnep1
Ctdsp1
Ctdsp2
Ctf1
Cthrc1
Ctif
Ctla2a
Ctla2b
Ctnna1
Ctnna2
Ctnna3
Ctnnal1
Ctnnb1
Ctnnbip1
Ctnnd1
Ctnnd2
Ctns
Ctps
Ctr9
Ctsa
Ctsb
Ctsc
Ctsd
Ctse
Ctsh
Ctsk
Ctsl
Ctso
Ctss
Ctsz
Cttn
Cttnbp2
Cttnbp2nl
Ctxn1
Ctxn2
Cul1
Cul2
Cul3
Cutal
Cux2
Cwc22
Cwc27
Cwf19l2
Cx3cl1
Cx3cr1
Cxadr
Cxcl1
Cxcl10
Cxcl13
Cxcl14
Cxcl16
Cxcr4
Cxxc4
Cyb561
Cyb561a3
Cyb5a
Cyb5b
Cyb5r1
Cyb5r2
Cyb5r3
Cyba
Cybb
Cybrd1
Cyc1
Cycs
Cyfip1
Cyfip2
Cygb
Cyhr1
Cyld
Cyp1b1
Cyp20a1
Cyp26b1
Cyp2d22
Cyp2j12
Cyp2j6
Cyp2j9
Cyp2s1
Cyp2u1
Cyp39a1
Cyp3a13
Cyp46a1
Cyp4f13
Cyp4f14
Cyp4f16
Cyp4f18
Cyp4v3
Cyp4x1
Cyp51
Cyp7b1
Cys1
Cysltr1
Cyth4
Cytip
D030028A08Rik
D030047H15Rik
D130017N08Rik
D130043K22Rik
D16Ertd472e
D17H6S56E-5
D2hgdh
D430041D05Rik
D630045J12Rik
D730005E14Rik
D7Ertd443e
D830031N03Rik
Daam2
Dab1
Dab2
Dab2ip
Dach1
Dact1
Dact2
Dact3
Dag1
Dagla
Daglb
Dao
Dap
Dap3
Dapp1
Dars
Daxx
Dazap2
Dbf4
Dbi
Dbn1
Dbndd1
Dbndd2
Dbt
Dbx2
Dcaf1
Dcaf12
Dcaf12l1
Dcaf12l2
Dcaf5
Dcbld1
Dcc
Dchs2
Dck
Dclk1
Dclk2
Dclre1a
Dclre1b
Dclre1c
Dcn
Dcp2
Dctn1
Dctn2
Dctn3
Dcun1d2
Dcun1d3
Dcun1d4
Dcxr
Ddah1
Ddah2
Ddhd2
Ddias
Ddit3
Ddit4l
Ddo
Ddost
Ddr1
Ddr2
Ddx1
Ddx19a
Ddx19b
Ddx21
Ddx24
Ddx25
Ddx39b
Ddx5
Ddx58
Ddx60
Decr1
Decr2
Def6
Def8
Dek
Dennd11
Dennd1c
Dennd2c
Dennd2d
Dennd4b
Dennd4c
Dennd5a
Dennd5b
Depdc5
Depdc7
Deptor
Dera
Derl1
Derl2
Desi1
Desi2
Dexi
Dffa
Dgcr2
Dgka
Dgkb
Dgke
Dgkg
Dgkk
Dgkq
Dgkz
Dhcr24
Dhcr7
Dhdds
Dhdh
Dhh
Dhrs1
Dhrs13
Dhrs3
Dhrs4
Dhx29
Dhx30
Dhx32
Dhx34
Dhx36
Dhx40
Dhx57
Dhx58
Dhx8
Diablo
Diaph2
Diaph3
Dip2a
Dip2b
Dip2c
Dipk1a
Dipk1b
Dipk1c
Diras1
Diras2
Dis3l
Disp2
Disp3
Dixdc1
Dkk2
Dkk3
Dlat
Dld
Dleu7
Dlg2
Dlg4
Dlg5
Dlgap1
Dlgap2
Dlgap3
Dlgap4
Dlgap5
Dlk1
Dll1
Dlst
Dmac2
Dmac2l
Dmd
Dmpk
Dmrt3
Dmtn
Dmxl1
Dmxl2
Dna2
Dnaaf3
Dnaaf5
Dnah11
Dnah12
Dnah8
Dnaic2
Dnaja1
Dnaja2
Dnaja4
Dnajb1
Dnajb13
Dnajb14
Dnajb2
Dnajb9
Dnajc1
Dnajc12
Dnajc13
Dnajc15
Dnajc18
Dnajc21
Dnajc25
Dnajc27
Dnajc3
Dnajc5
Dnajc6
Dnali1
Dnase1
Dnase1l1
Dnase2a
Dnlz
Dnm1
Dnm1l
Dnm2
Dnm3
Dnmbp
Doc2a
Dock1
Dock2
Dock3
Dock5
Dock6
Dock7
Dock8
Dock9
Dohh
Dok1
Dok6
Dop1a
Dop1b
Dpcd
Dpf3
Dpp10
Dpp6
Dpp7
Dpp8
Dpp9
Dpy19l1
Dpy19l3
Dpy19l4
Dpyd
Dpysl2
Dpysl3
Dpysl5
Dram1
Dram2
Drc7
Drd2
Drd5
Drosha
Drp2
Dscam
Dse
Dsn1
Dst
Dstyk
Dtd1
Dtl
Dtna
Dtnb
Dtnbp1
Dtx1
Dtx3l
Dtx4
Duoxa1
Dusp1
Dusp13
Dusp15
Dusp18
Dusp19
Dusp22
Dusp26
Dusp27
Dusp28
Dusp5
Dusp6
Dusp8
Dut
Dym
Dync1h1
Dync1i1
Dync1li1
Dync1li2
Dync2h1
Dync2li1
Dynll2
Dynlrb2
Dynlt3
Dysf
Dzank1
Dzip1
Dzip3
E130114P18Rik
E130317F20Rik
E230029C05Rik
E2f1
E2f2
E2f5
E2f6
E2f8
Ebi3
Ecel1
Ech1
Echdc1
Echdc2
Echdc3
Echs1
Eci2
Ecm1
Ecm2
Ecpas
Ecrg4
Ecscr
Ecsit
Ect2
Eda
Eda2r
Edem1
Edem2
Edil3
Edn2
Ednra
Ednrb
Edrf1
Eed
Eef1a1
Eef1a2
Eef1akmt4
Eef1b2
Eef2k
Eef2kmt
Efcab14
[truncated: 5,417 more rows]
