# Supplementary material for: A Transcriptomic Meta-Analysis Shows Lipid Metabolism Dysregulation as an Early Pathological Mechanism in the Spinal Cord of SOD1 Mice
Source: Int J Mol Sci. 2021 Sep 2;22(17):9553. doi: 10.3390/ijms22179553 (PMC8431303; doi:10.3390/ijms22179553)
Supplement: Supplementary file 1 [file ijms-22-09553-s001.zip › Supplementary Files/Table S4 List of lipid genes found in the Early-MA and Late-MA.xlsx]

## Sheet: Lipids Early-MA
Table S4. List of genes related to lipid metabolism found in the early-symptomatic and late-symptomatic meta-analysis
abca1
abca9
abcc3
abcd3
abhd4
acat2
ache
acly
acot11
acot7
acss2
agt
ajuba
alg14
alox5ap
ang
angptl4
ano4
ano6
anxa2
apobec1
apobr
apoc1
apoe
asah1
aspg
atp10b
atp1a1
atp8a2
bmp6
c3
capn2
ccdc3
ccdc71l
ccn1
cd74
cd81
cebpa
ch25h
chat
clu
cpne3
cpne6
crem
csf1r
ctsa
cyp1b1
cyp27a1
cyp39a1
dhcr24
dhcr7
dhrs3
egfr
egr1
erlin2
esyt1
etnppl
fabp7
fam135b
fam57b
fdps
fgf1
fgf2
fgf21
fgfr3
fgfr4
fgr
gal3st4
ggt5
glb1
glipr1
golm1
gpam
gpc1
hacd2
hacd4
hcar2
hexa
hexb
hpgd
hpgds
il1b
il1rn
inpp5d
inppl1
insig1
ip6k3
itgav
itgb8
lcat
lgmn
lpcat1
lpcat3
lpcat4
lpl
lrp1
lyn
mfsd2a
mgst3
mlxipl
msr1
naga
nfya
nsdhl
ormdl3
osbpl7
pcyt1b
pde3b
piga
pigz
pik3cg
pla2g15
plcb2
plcb3
plce1
plcg2
pld2
pld4
plek
plekha1
plekha4
plin2
plscr2
pnpla2
pnpla3
pnpla7
pon3
prdx6
prkcd
psap
ptgs1
ptk2b
rack1
rb1
rbp1
sdc3
sdc4
serinc2
serinc3
sgpl1
slc10a4
slc22a4
slc44a2
slco2b1
soat1
socs3
sod1
sorbs1
spp1
sqle
st3gal5
st8sia6
stard4
sult4a1
syk
tbxas1
tecr
tgfb1
tm7sf2
tnfrsf1a
tpp1
trib3
tspo
ttc39b
ucn
vdr

## Sheet: Lipids Late-MA
Table S4. List of genes related to lipid metabolism found in the early-symptomatic and late-symptomatic meta-analysis
abca1
abca5
abca6
abca7
abca9
abcc3
abcc4
abcd1
abcd3
abcg4
abhd15
abhd16a
abhd2
abhd4
abhd6
acaa2
acad10
acad8
acad9
acadl
acadm
acads
acadsb
acadvl
acat1
acat2
ace
acer3
ache
acly
acot1
acot2
acot7
acox1
acox3
acsbg1
acsf2
acsl1
acsl6
acss2
adh5
adipor1
adm
adra2a
afp
agap2
agk
agpat2
agpat3
agpat5
agt
agtr2
ajuba
akr1b10
akt1
alas1
aldh1a1
aldh3b1
aldh5a1
alg10b
alg11
alg2
alox5
alox5ap
ang
angptl4
ano3
ano4
ano6
anxa1
anxa2
aoah
apobec1
apobr
apoc1
apoc4
apod
apoe
app
aqp9
arf3
arsa
asah1
asah2
aspg
atp10b
atp11c
atp1a1
atp8a1
atp8a2
atp8b2
atp8b3
atp8b4
atp9a
auh
b3galt1
b3galt2
b3gnt5
b4galt4
b4galt5
b4galt6
bax
bbs4
bcl11b
bco2
bdh2
bmp2
bmp6
bpnt1
bscl2
c1qtnf1
c2cd2l
c3
capn2
cav1
cbr1
cbr4
ccdc3
ccdc71l
cckbr
ccn1
cd36
cd74
cd81
cdk4
cds1
cds2
cebpa
cers2
cers5
ch25h
chat
chpt1
cln3
cln6
cln8
clu
cnr1
col4a3bp
comt
cpne1
cpne3
cpne6
cpt1a
cpt2
cptp
crabp1
crat
crebl2
crem
crh
crhr1
crot
cryl1
csf1r
csnk1g2
ctdnep1
ctsa
cyb5r1
cyb5r2
cyb5r3
cygb
cyp1b1
cyp26b1
cyp2s1
cyp2u1
cyp39a1
cyp46a1
cyp7b1
dab2ip
dagla
daglb
dbi
ddhd2
decr1
decr2
dgka
dgkb
dgke
dgkg
dgkk
dgkq
dgkz
dhcr24
dhcr7
dhdds
dhh
dhrs3
dhrs4
disp3
dkk3
dld
dnajc15
drd2
ech1
echdc1
echdc2
echs1
eci2
edn2
eef1a2
efr3a
egfr
egr1
ehhadh
elovl4
elovl6
elovl7
enpp2
erlin1
erlin2
esyt1
etfa
etfdh
etnk1
fa2h
faah
fabp3
fabp4
fabp5
fabp7
fads1
fads2
fads3
fads6
fam126b
fam135b
fam3a
fam57b
far1
far2
fasn
fbxw7
fdft1
fdps
fdx1
fgf1
fgf2
fgf21
fgfr1
fgfr4
fgr
fig4
fitm2
flt3
fuca1
g0s2
gal3st1
gal3st3
gal3st4
galc
gba
gba2
gbgt1
gdpd1
gdpd2
ggps1
ggt5
ghsr
gla
glb1
glipr1
gltp
gm2a
golm1
got2
gpam
gpat3
gpat4
gpc1
gpc3
gpc4
gpc5
gpc6
gpcpd1
gpd1
gpld1
gps2
gpx1
gramd1b
gramd1c
gstm4
gulp1
hacd2
hacd4
hadh
hadha
hadhb
hcar2
hdlbp
helz2
hexa
hexb
hmgcl
hmgcll1
hmgcr
hmgcs1
hmgcs2
hpgd
hpgds
hsd11b1
hsd17b2
hsd17b4
hsd17b7
hsd3b7
hspg2
htr2a
htr2b
htr2c
idi1
igfbp7
il1b
il1rn
impa1
impa2
inhba
inpp1
inpp4a
inpp5d
inpp5e
inpp5f
inpp5j
inppl1
insig1
insig2
ip6k1
ip6k2
ip6k3
itgav
itgb8
jazf1
kcnn4
large1
lbp
lcat
ldlr
ldlrap1
lgmn
lima1
lipa
liph
lpcat1
lpcat2
lpcat3
lpcat4
lpgat1
lpin1
lpin3
lpl
lrp1
lrp10
lss
ltc4s
lyn
lypla2
map2k6
mapk14
mboat7
me1
mfsd2a
mgst3
mid1ip1
mif
mlxipl
mmut
mogat1
mpdu1
mppe1
msmo1
msr1
mt3
mtmr1
mtmr12
mtmr4
mtmr6
mtmr7
mtmr9
mtor
mvd
mvk
myo5a
naaa
naga
napepld
ncoa1
ndufab1
neu4
nfe2l1
nfkb1
nfkbia
nfya
npc2
nr1d2
nr1h3
nr5a2
nsdhl
nudt19
oma1
opa3
ormdl1
ormdl3
osbp2
osbpl10
osbpl11
osbpl1a
osbpl2
osbpl3
osbpl6
osbpl7
p2rx4
p2rx7
p2ry12
pafah1b1
pafah1b2
pafah1b3
pafah2
pccb
pck2
pcyt1a
pcyt1b
pcyt2
pde3b
pdgfb
pdgfra
pdgfrb
pdk3
pdk4
pdp1
pdzd8
pex11a
pex2
pgp
pgs1
phospho1
phyh
pi4k2a
pi4k2b
pi4ka
piga
pigm
pign
pigq
pigt
pigz
pik3c2a
pik3c2b
pik3c2g
pik3c3
pik3cb
pik3cd
pik3cg
pik3ip1
pik3r4
pik3r5
pik3r6
pip4k2a
pip4k2b
pip4p1
pip5k1a
pip5k1b
pip5k1c
pisd
pitpna
pitpnc1
pitpnm1
pitpnm2
pitpnm3
pla2g12a
pla2g15
pla2g2e
pla2g5
pla2g7
pla2r1
plaat1
plagl2
plb1
plbd2
plcb1
plcb2
plcb3
plcb4
plcd1
plcd4
plce1
plcg2
plch1
plcxd2
plcxd3
pld2
pld3
pld4
plek
plekha1
plekha2
plekha4
plekha8
plin2
plp1
plpp1
plpp3
plpp4
plpp5
plppr2
plppr3
plppr4
plppr5
plscr1
plscr2
plscr3
plscr4
pm20d1
pmvk
pnpla2
pnpla6
pnpla7
pon2
pon3
por
ppard
ppargc1a
ppm1l
ppp2ca
ppp2r1a
ppp2r5a
ppp4r3b
ppt1
prdx6
prelid1
prelid2
prkaa1
prkab1
prkab2
prkar2b
prkcd
prkce
prkd1
prkd3
prlr
proca1
prpf19
prxl2b
psap
ptch1
ptges2
ptgr1
ptgr2
ptgs1
ptk2b
ptpmt1
ptprn2
pyurf
rack1
rarres2
rb1
rbl1
rbp1
rdh10
relch
rest
retsat
rlbp1
rorc
rubcn
rubcnl
rufy1
sacm1l
sc5d
scarb2
sccpdh
scp2
scpep1
sdc1
sdc2
sdc3
sdc4
sdr42e1
selenoi
selenom
serinc1
serinc3
sgms2
sgpl1
sgpp2
shh
sigmar1
sirt1
sirt2
slc10a4
slc10a6
slc16a1
slc22a4
slc25a20
slc27a2
slc27a4
slc35c1
slc44a1
slc44a2
slc44a3
slc45a3
slco1c1
slco2b1
slco3a1
smarcd3
smpd2
snai1
snai2
snca
soat1
soat2
socs3
socs5
socs6
sorbs1
sorl1
sp1
sphk1
spns2
spp1
sptlc1
sptssa
sptssb
sqle
src
srd5a3
srebf1
srebf2
st3gal2
st3gal5
st6galnac3
st6galnac4
st6galnac5
st6galnac6
st8sia1
st8sia2
st8sia3
st8sia5
st8sia6
stard10
stard4
stard6
stoml1
stub1
sult1a1
sult2b1
sult4a1
sumf1
sumf2
syk
synj1
syt7
taz
tbxas1
tecr
tex2
tfcp2l1
tgfb1
thbs1
thnsl2
thrsp
tiam2
tiparp
tm7sf2
tmem150a
tmem30a
tmem38b
tmem86a
tnf
tnfaip8l3
tnfrsf11a
tnfrsf1a
tnfrsf21
tnfsf11
tpp1
trerf1
trib3
tspo
tspoap1
ttc39b
ttc7b
ttpa
ugcg
vapb
vav3
vdr
wdr81
wdtc1
wwox
xkr6
ywhah
zmpste24
