# Supplementary material for: A Transcriptomic Meta-Analysis Shows Lipid Metabolism Dysregulation as an Early Pathological Mechanism in the Spinal Cord of SOD1 Mice
Source: Int J Mol Sci. 2021 Sep 2;22(17):9553. doi: 10.3390/ijms22179553 (PMC8431303; doi:10.3390/ijms22179553)
Supplement: Supplementary file 1 [file ijms-22-09553-s001.zip › Supplementary Files/Table S5 List of primers used for qPCR validations.xlsx]

## Sheet: Hoja1
Table S5. List of primers
Primers used for qPCRs validations:
Gene	Fw primer	Reverse primer
Abca1	CTGACCTATGTGCTGCCGTA	GAGCCGGTCATCAATCTCAT
Ch25h	TGCTACAACGGTTCGGAGC	AGAAGCCCACGTAAGTGATGAT
Hexb	GCTGTTGGTGAGAGACTCTGGA	GAGGTTGTGCAGCTATTCCACG
Sgpl1	CTGAAGGACTTCGAGCCTTATTT	ACTCCACGCAATGAGCTGC
S16	TTCTGGGCAAGGAGCGATT	GATGGACTGTCGGATGGCA
Primers and probe used for genotyping:
Sod1-G93A Fw	CAGCCCTAATCCATCTGATGCTT
Sod1-G93A Rv	AGACACATCGGCCACAGCAT
Sod1-G93A probe (FAM)	TTCATTATTAGGCATGTTGGAGAC
